# Supplementary material for: Rational Design of Chiral Single-Benzene-Based Fluorophores via Enantioselective Twofold C−H Activation: Solid-State and Circular Polarization Luminescence, and Cellular Imaging Application
Source: Research Square preprint supplement (doi:10.21203/rs.3.rs-3409815/v1), 2023-10-11
Supplement: Supplementary file 1 [file f77980feb33d232e9861b475.pdf]

# **Rational Design of Chiral Single-Benzene-Based Fluorophores via Enantioselective Twofold C–H Activation: Solid-State and Circular Polarization Luminescence, and Cellular Imaging Application**

Zhong-Yuan Li,<sup>\*,a</sup> Fang Liu,<sup>a</sup> Heng Li,<sup>a</sup> Xing Guo,<sup>a</sup> Qinghua Wu,<sup>\*,b</sup> Lijuan Jiao,<sup>a</sup> and

Erhong Hao<sup>\*,a</sup>

<sup>a</sup>Anhui Laboratory of Molecule-Based Materials; Key Laboratory of Functional Molecular Solids, Ministry of Education; School of Chemistry and Materials Science, Anhui Normal University, Wuhu, 241002, China.

<sup>b</sup>School of Pharmacy, Anhui University of Chinese Medicine, Hefei, 230012, China.

E-mail: [zhongyuanli@ahnu.edu.cn](mailto:zhongyuanli@ahnu.edu.cn); [qinghuaw@ahtcm.edu.cn](mailto:qinghuaw@ahtcm.edu.cn);

[haoehong@ahnu.edu.cn](mailto:haoehong@ahnu.edu.cn).

## **Table of Contents**

|                                                                                                                  |     |
|------------------------------------------------------------------------------------------------------------------|-----|
| 1. General.....                                                                                                  | S3  |
| 2. Preparation of Substrates.....                                                                                | S3  |
| 3. Characterization of Substrates.....                                                                           | S5  |
| 4. General Procedure for the Construction of SBBFs via Rh-Catalyzed Enantioselective Twofold C–H Activation..... | S14 |
| 5. Characterization of Products.....                                                                             | S14 |
| 6. Procedure for the Synthesis of <b>Int-1</b> .....                                                             | S34 |

|                                                                                                         |       |
|---------------------------------------------------------------------------------------------------------|-------|
| 7. Procedure for the Synthesis of <b>Int-1'</b> .....                                                   | S34   |
| 8. Procedure for Rh-Catalyzed C–H Activation with <b>Int-1</b> .....                                    | S35   |
| 9. Procedure for Rh-Catalyzed C–H Activation with <b>Int-1'</b> .....                                   | S36   |
| 10. Crude <sup>1</sup> H NMR with 1,3,5-Trimethoxybenzene as Internal Standard.....                     | S36   |
| 11. General Procedure for the Synthesis of <b>Int-2</b> .....                                           | S37   |
| 12. General Procedure for the Synthesis of <b>5</b> .....                                               | S38   |
| 13. General Procedure for the Synthesis of <b>6</b> .....                                               | S38   |
| 14. General Procedure for the Synthesis of <b>7</b> .....                                               | S39   |
| 15. General Procedure for the Synthesis of <b>8</b> .....                                               | S39   |
| 16. General Procedure for the Synthesis of <b>9</b> .....                                               | S40   |
| 17. General Procedure for the Synthesis of <b>10</b> .....                                              | S40   |
| 18. Cellular studies of <b>3al</b> and <b>3ao</b> .....                                                 | S41   |
| 19. NMR and HPLC Spectra of <b>1a-1za</b> , <b>3aa-3zaa</b> , <b>3ab-3ao</b> and <b>Int-1-10e</b> ..... | S42   |
| 20. Crystallographic Data of <b>3aa</b> .....                                                           | S161  |
| 21. Crystallographic Data of <b>Int-2</b> .....                                                         | S163  |
| 22. Photophysical Spectra of <b>3aa-3zaa</b> , <b>3ab-3ao</b> and <b>10a-10e</b> .....                  | S165  |
| 23. DFT Calculation of <b>10e</b> .....                                                                 | S174  |
| 24. References.....                                                                                     | S 176 |

## 1. General

**Experimental:** Unless otherwise noted, all the reactions were set up under N<sub>2</sub> atmosphere utilizing glassware that was flame-dried and cooled under vacuum. All non-aqueous manipulations were using standard Schlenk techniques. Reactions were monitored using thin-layer chromatography (TLC) on Silica Gel plates. Visualization of the developed plates was performed under UV light (254 nm) or KMnO<sub>4</sub> stain. Silica-gel flash column chromatography was performed using 200–300 mesh silica gel.

**Materials:** Unless otherwise indicated, starting catalysts and materials were obtained from Energy Chemicals, Bidepharm and J&K Scientific. Moreover, commercially available reagents were used without additional purification.

**Instrumentation:** <sup>1</sup>H NMR spectra were recorded at 400 MHz NMR spectrometers using TMS as an internal standard, <sup>13</sup>C NMR spectra were recorded at 101 MHz spectrometers using TMS as an internal standard, and were fully decoupled by broad band proton decoupling. <sup>1</sup>H NMR chemical shifts are reported in parts per million (ppm) and are referenced to residual protium in the NMR solvent ( $\delta$  0.00 for TMS). <sup>13</sup>C NMR chemical shifts are reported in parts per million (ppm) and are referenced to the carbon resonances of the solvent residual peak ( $\delta$  77.16 for CDCl<sub>3</sub>). Data for <sup>1</sup>H NMR and <sup>13</sup>C NMR are reported as follows: multiplicity (s = singlet, d = doublet, t = triplet, q = quartet, m = multiplet, br = broad), coupling constant (Hz) and integration. High-resolution mass spectra (HRMS) were obtained using ESI-TOF in positive or negative mode. Analytical HPLC was performed on Thermo Series or Angilent 1260 instrument using Daicel Chiralcel® columns as noted. Optical rotation values were measured on a Schmidt Haensch polarimeter.

**Photophysical studies:** UV-visible absorption and fluorescence emission spectra were recorded on a commercial spectrophotometer (Shimadzu UV-2450 and Edinburgh FS5 spectrometers, 190-900 nm scan range). Absolute fluorescence quantum yields were determined using a Hamamatsu Quantaurus spectrofluorometer equipped with an integrating sphere. The corresponding sample was measured at various dilutions to approach a value without self-quenching contributions. Each measurement was repeated three times and the average was calculated. Fluorescence lifetime ( $\tau$ ) were determined by Time-Correlated Single Photon Counting (TCSPC) technique with the FLS 1000 spectrometer by exciting the sample with pulsed laser diodes at 380 nm under magic angle conditions and using a fast PMT detector (R928P) for fluorescence detection. The fitting process was performed with the programs Fluoracle and FAST and completed when ca.  $\chi^2 < 1.2$  was reached. Radiative rate ( $k_r$ ) constant according to  $\Phi_F/\tau_F$ . Non-radiative rate constant ( $k_{nr}$ ) according to  $(1-\Phi_F)/\tau_F$ .

## 2. Preparation of Substrates

### General procedure A<sup>1a-b</sup>

The synthesis of allyl bromides (S1).

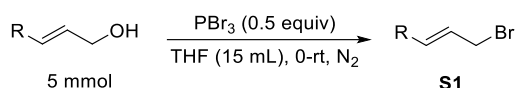

To a 50 mL Schlenk flask equipped with a stirring bar was added allyl alcohol (5 mmol). The mixture was then evacuated and backfilled with nitrogen for three times. After that, THF (15 mL) and PBr<sub>3</sub> (0.5 equiv.) were added by syringe at 0 °C. The mixture was then stirred at room temperature for another 1.5 h. the reaction was quenched by adding H<sub>2</sub>O (20 mL) and saturated NaHCO<sub>3</sub>, extracted with ethyl acetate (25 mL × 2). After removing all of the solvent, the product was used for the next step directly without further purification.

The synthesis of substrates **1**.

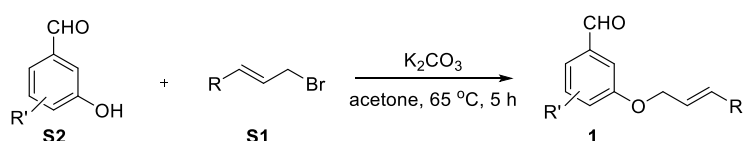

To a 50 mL one-neck round flask equipped with a stirring bar was added **S2** (3 mmol) and K<sub>2</sub>CO<sub>3</sub> (6 mmol) in acetone (20 mL), followed by allyl bromide (5 mmol). The mixture was stirred at 65 °C for 5 h. The solvent was removed and reaction mixture was extracted with H<sub>2</sub>O (20 mL) and ethyl acetate (40 mL). Dried over anhydrous Na<sub>2</sub>SO<sub>4</sub>, filtration and removed all of organic solvent. The residue was purified by flash chromatography (petroleum ether/ethyl acetate = 20 : 1) to get substrate **1**.

### General procedure B<sup>1c</sup>

The synthesis of allyl chlorides (**S1'**).

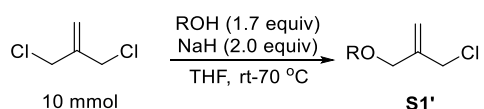

To a 50 mL one-neck round flask equipped with a stirring bar were added alcohol (17 mmol) and THF (20 mL). The mixture was added NaH (20 mmol) and stirred at room temperature for 0.5 h. After that, the solution of allyl chloride (10 mmol) in THF (5 mL) was added slowly at 0 °C. The mixture was then stirred at 70 °C for another 12 h. The reaction was quenched by adding H<sub>2</sub>O (20 mL) and saturated NaHCO<sub>3</sub>, extracted with CH<sub>2</sub>Cl<sub>2</sub> (25 mL × 2). After removing all of the solvent, the product **S1'** was used for the next step directly without further purification.

The synthesis of substrates **1**.

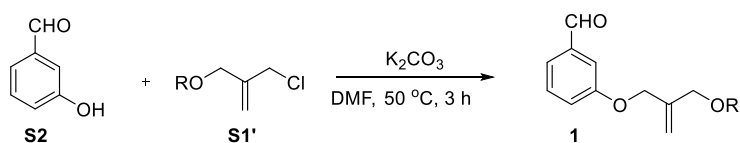

To a 50 mL one-neck round flask equipped with a stirring bar was added **S2** (4 mmol) and  $K_2CO_3$  (8 mmol) in DMF (15 mL), followed by **S1'** (4 mmol). The mixture was stirred at 50 °C for 3 h. The solvent was removed and reaction mixture was extracted with  $H_2O$  (20 mL) and  $CH_2Cl_2$  (40 mL). Dried over anhydrous  $Na_2SO_4$ , filtration and removed all of organic solvent. The residue was purified by flash chromatography (petroleum ether/ethyl acetate = 20 : 1) to get substrate **1**.

The synthesis of substrates **2**.<sup>2</sup>

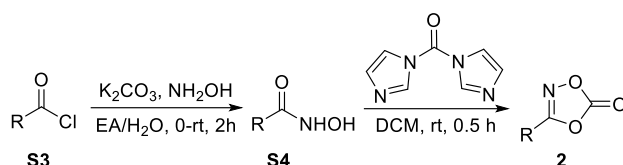

To a stirred biphasic mixture of  $\text{NH}_2\text{OH}\cdot\text{HCl}$  (10 mmol, 2.0 equiv.) in ethyl acetate (40 mL) and  $H_2O$  (20 mL) was added  $K_2CO_3$  (10 mmol, 2.0 equiv.). The solution was cooled to 0 °C followed by dropwise addition of acid chloride (5 mmol), and then warmed to room temperature and stirred for additional 1.5 h. The reaction mixture was extracted with ethyl acetate (25 mL  $\times$  2) and dried over anhydrous  $Na_2SO_4$ , filtered and removed all of organic solvent. The crude product (**S4**) was directly used for the next step without purification.

To a stirred mixture of hydroxamic acid (**S4**) in  $CH_2Cl_2$  (50 mL) was added 1,1'-carbonyldiimidazole (5.5 mmol, 1.1 equiv.). The residue was stirred for 0.5 h. The reaction was quenched with 1 M  $HCl$  (15 mL) and extracted with  $CH_2Cl_2$  (25 mL  $\times$  2). The combined organic phase was washed with  $H_2O$  (50 mL), dried over anhydrous  $Na_2SO_4$  and removed all of organic solvent to afford crude 3-substituted 1,4,2-dioxazol-5-ones. The crude product was purified through a short silica gel chromatography quickly (petroleum ether/ethyl acetate = 20 : 1) to get pure product of **2**.

### 3. Characterization of Substrates

#### (*E*)-3-(Cinnamyloxy)benzaldehyde

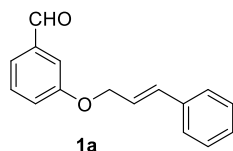

By following the general procedure **A**, the product **1a** was afforded (0.56 g, 78% yield). **<sup>1</sup>H NMR** (400 MHz,  $CDCl_3$ )  $\delta$  9.98 (s, 1H), 7.50–7.40 (m, 5H), 7.36–7.31 (m, 2H), 7.29–7.22 (m, 2H), 6.76 (d,  $J$  = 16.0 Hz, 1H), 6.42 (dt,  $J$  = 16.0, 5.8 Hz, 1H), 4.77 (dd,  $J$  = 5.8, 1.5 Hz, 2H); **<sup>13</sup>C NMR** (101 MHz,  $CDCl_3$ )  $\delta$  192.2, 159.3, 138.0, 136.4, 133.7, 130.3, 128.8 (2C), 128.2, 126.7 (2C), 123.81, 123.78, 122.3, 113.2, 69.0; **HRMS** (ESI) Calcd for  $C_{16}H_{15}O_2$   $[M+H]^+$  239.1067; found 239.1068.

**(E)-3-((3-(4-Tolyl)allyl)oxy)benzaldehyde**

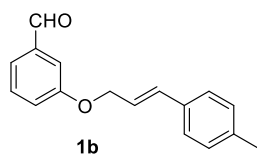

By following the general procedure **A**, the product **1b** was afforded (0.58 g, 76% yield). **<sup>1</sup>H NMR** (400 MHz, CDCl<sub>3</sub>)  $\delta$  9.98 (s, 1H), 7.50–7.43 (m, 3H), 7.32 (d,  $J$  = 8.2 Hz, 2H), 7.27–7.21 (m, 1H), 7.14 (d,  $J$  = 7.8 Hz, 2H), 6.72 (d,  $J$  = 16.0 Hz, 1H), 6.36 (dt,  $J$  = 15.9, 5.9 Hz, 1H), 4.74 (d,  $J$  = 5.7 Hz, 2H), 2.34 (s, 3H); **<sup>13</sup>C NMR** (101 MHz, CDCl<sub>3</sub>)  $\delta$  192.2, 159.3, 138.1, 137.9, 133.7, 133.5, 130.2, 129.4 (2C), 126.7 (2C), 123.7, 122.7, 122.3, 113.3, 69.1, 21.4; **HRMS** (ESI) Calcd for C<sub>17</sub>H<sub>17</sub>O<sub>2</sub> [M+H]<sup>+</sup> 253.1223; found 253.1223.

**(E)-3-((3-(4-Fluorophenyl)allyl)oxy)benzaldehyde**

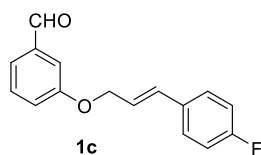

By following the general procedure **A**, the product **1c** was afforded (0.49 g, 64% yield). **<sup>1</sup>H NMR** (400 MHz, CDCl<sub>3</sub>)  $\delta$  9.98 (s, 1H), 7.51–7.42 (m, 3H), 7.42–7.35 (m, 2H), 7.23 (dt,  $J$  = 6.5, 2.7 Hz, 1H), 7.06–6.99 (m, 2H), 6.72 (d,  $J$  = 16.0 Hz, 1H), 6.33 (dt,  $J$  = 15.9, 5.8 Hz, 1H), 4.75 (dd,  $J$  = 5.9, 1.5 Hz, 2H); **<sup>13</sup>C NMR** (101 MHz, CDCl<sub>3</sub>)  $\delta$  192.2, 162.7 (d,  $J$  = 247.5 Hz), 159.3, 138.0, 132.6, 132.5, 130.3, 128.3 (d,  $J$  = 8.1 Hz, 2C), 123.9, 123.5 (d,  $J$  = 2.3 Hz), 122.3, 115.7 (d,  $J$  = 21.7 Hz, 2C), 113.1, 68.9; **HRMS** (ESI) Calcd for C<sub>16</sub>H<sub>14</sub>FO<sub>2</sub> [M+H]<sup>+</sup> 257.0972; found 257.0972.

**(E)-3-((3-(4-Chlorophenyl)allyl)oxy)benzaldehyde**

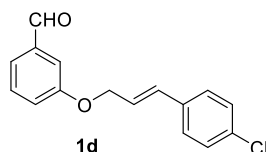

By following the general procedure **A**, the product **1d** was afforded (0.56 g, 68% yield). **<sup>1</sup>H NMR** (400 MHz, CDCl<sub>3</sub>)  $\delta$  9.98 (s, 1H), 7.50–7.41 (m, 3H), 7.36–7.27 (m, 4H), 7.23 (dt,  $J$  = 6.7, 2.6 Hz, 1H), 6.70 (d,  $J$  = 16.0 Hz, 1H), 6.38 (dt,  $J$  = 16.0, 5.7 Hz, 1H), 4.74 (dd,  $J$  = 5.7, 1.5 Hz, 2H); **<sup>13</sup>C NMR** (101 MHz, CDCl<sub>3</sub>)  $\delta$  192.2, 159.1, 137.8, 134.8, 133.7, 132.1, 130.2, 128.8 (2C), 127.9 (2C), 124.4, 123.9, 122.1, 113.0, 68.6; **HRMS** (ESI) Calcd for C<sub>16</sub>H<sub>14</sub>ClO<sub>2</sub> [M+H]<sup>+</sup> 273.0677; found 273.0677.

**(E)-3-((3-(4-(Trifluoromethyl)phenyl)allyl)oxy)benzaldehyde**

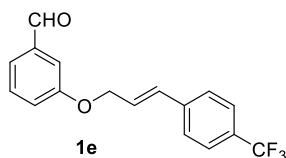

By following the general procedure **A**, the product **1e** was afforded (0.54 g, 59% yield). **<sup>1</sup>H NMR** (400 MHz, CDCl<sub>3</sub>)  $\delta$  9.99 (s, 1H), 7.59 (d,  $J$  = 8.2 Hz, 2H), 7.54–7.43 (m, 5H), 7.27–7.23 (m, 1H), 6.80 (d,  $J$  = 16.1 Hz, 1H), 6.51 (dt,  $J$  = 16.0, 5.5 Hz, 1H), 4.79 (dd,  $J$  = 5.5, 1.6 Hz, 2H); **<sup>13</sup>C NMR** (101 MHz, CDCl<sub>3</sub>)  $\delta$  192.2, 159.1, 139.9, 138.0, 131.8, 130.3, 129.9 (q,  $J$  = 32.4 Hz), 126.9 (2C), 126.6, 125.7 (q,  $J$  = 3.8 Hz, 2C), 124.2 (q,  $J$  = 273.1 Hz), 124.1, 122.3, 113.0, 68.5; **HRMS** (ESI) Calcd for C<sub>17</sub>H<sub>14</sub>F<sub>3</sub>O<sub>2</sub> [M+H]<sup>+</sup> 307.0940; found 307.0945.

**(E)-3-((3-(3-Methoxyphenyl)allyl)oxy)benzaldehyde**

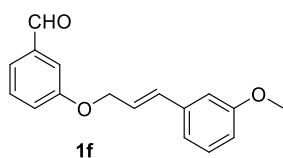

By following the general procedure **A**, the product **1f** was afforded (0.69 g, 86% yield). **<sup>1</sup>H NMR** (400 MHz, CDCl<sub>3</sub>)  $\delta$  9.98 (s, 1H), 7.51–7.42 (m, 3H), 7.28–7.21 (m, 2H), 7.01 (d,  $J$  = 7.6 Hz, 1H), 6.95 (s, 1H), 6.83 (dd,  $J$  = 7.9, 2.0 Hz, 1H), 6.73 (d,  $J$  = 16.0 Hz, 1H), 6.41 (dt,  $J$  = 15.9, 5.7 Hz, 1H), 4.76 (dd,  $J$  = 5.8, 1.5 Hz, 2H), 3.82 (s, 3H); **<sup>13</sup>C NMR** (101 MHz, CDCl<sub>3</sub>)  $\delta$  192.2, 159.9, 159.3, 138.0, 137.8, 133.5, 130.3, 129.8, 124.1, 123.8, 122.3, 119.4, 113.8, 113.2, 112.0, 68.9, 55.4; **HRMS** (ESI) Calcd for C<sub>17</sub>H<sub>17</sub>O<sub>3</sub> [M+H]<sup>+</sup> 269.1172; found 269.1174.

**(E)-3-((3-(3-Tolyl)allyl)oxy)benzaldehyde**

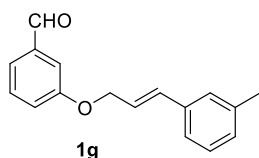

By following the general procedure **A**, the product **1g** was afforded (0.60 g, 79% yield). **<sup>1</sup>H NMR** (400 MHz, CDCl<sub>3</sub>)  $\delta$  9.96 (s, 1H), 7.48–7.41 (m, 3H), 7.25–7.19 (m, 4H), 7.11–7.04 (m, 1H), 6.71 (d,  $J$  = 16.0 Hz, 1H), 6.39 (dt,  $J$  = 15.9, 5.8 Hz, 1H), 4.73 (dd,  $J$  = 5.9, 1.5 Hz, 2H), 2.34 (s, 3H); **<sup>13</sup>C NMR** (101 MHz, CDCl<sub>3</sub>)  $\delta$  192.2, 159.3, 138.3, 137.9, 136.2, 133.7, 130.2, 128.9, 128.6, 127.4, 123.8, 123.7, 123.5, 122.2, 113.2, 68.9, 21.5; **HRMS** (ESI) Calcd for C<sub>17</sub>H<sub>17</sub>O<sub>2</sub> [M+H]<sup>+</sup> 253.1223; found 253.1224.

**(E)-3-((3-(3-Fluorophenyl)allyl)oxy)benzaldehyde**

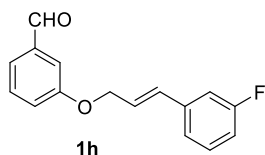

By following the general procedure **A**, the product **1h** was afforded (0.49 g, 63% yield). **<sup>1</sup>H NMR** (400 MHz, CDCl<sub>3</sub>)  $\delta$  9.98 (s, 1H), 7.51–7.43 (m, 3H), 7.33–7.22 (m, 2H), 7.17 (d,  $J$  = 7.7 Hz, 1H), 7.11 (d,  $J$  = 10.1 Hz, 1H), 6.96 (td,  $J$  = 8.4, 2.6 Hz, 1H), 6.72 (d,  $J$  = 16.0 Hz, 1H), 6.42 (dt,  $J$  = 15.9, 5.6 Hz, 1H), 4.76 (dd,  $J$  = 5.7, 1.6 Hz, 2H); **<sup>13</sup>C NMR** (101 MHz, CDCl<sub>3</sub>)  $\delta$  192.0, 163.1 (d,  $J$  = 245.5 Hz), 159.1, 138.6 (d,  $J$  = 7.7 Hz), 137.9, 132.0 (2.6 Hz), 130.2, 130.1 (d,  $J$  = 9.5 Hz), 125.2, 123.8, 122.6 (d,  $J$  = 2.8 Hz), 122.1, 114.8 (d,  $J$  = 21.1 Hz), 113.04, 113.03 (d,  $J$  = 21.9 Hz), 68.4; **HRMS** (ESI) Calcd for C<sub>16</sub>H<sub>14</sub>FO<sub>2</sub> [M+H]<sup>+</sup> 257.0972; found 257.0974.

**(E)-3-((3-(3-Chlorophenyl)allyl)oxy)benzaldehyde**

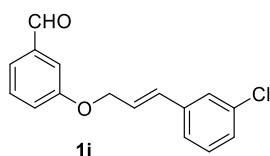

By following the general procedure **A**, the product **1i** was afforded (0.52 g, 65% yield). **<sup>1</sup>H NMR** (400 MHz, CDCl<sub>3</sub>)  $\delta$  9.98 (s, 1H), 7.51–7.41 (m, 3H), 7.39 (s, 1H), 7.30–7.19 (m, 4H), 6.69 (d,  $J$  = 16.0 Hz, 1H), 6.41 (dt,  $J$  = 15.8, 5.6 Hz, 1H), 4.78–4.70 (m, 2H); **<sup>13</sup>C NMR** (101 MHz, CDCl<sub>3</sub>)  $\delta$  192.2, 159.1, 138.2, 137.9, 134.7, 131.9, 130.3, 130.0, 128.0, 126.6, 125.4, 124.9, 123.9, 122.2, 113.1, 68.5; **HRMS** (ESI) Calcd for C<sub>16</sub>H<sub>14</sub>ClO<sub>2</sub> [M+H]<sup>+</sup> 273.0677; found 273.0678.

**(E)-3-((3-(3-(Trifluoromethyl)phenyl)allyl)oxy)benzaldehyde**

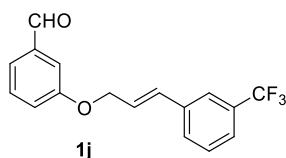

By following the general procedure **A**, the product **1j** was afforded (0.70 g, 76% yield). **<sup>1</sup>H NMR** (400 MHz, CDCl<sub>3</sub>)  $\delta$  9.99 (s, 1H), 7.66 (s, 1H), 7.58 (d,  $J$  = 7.7 Hz, 1H), 7.54–7.41 (m, 5H), 7.26–7.21 (m, 1H), 6.79 (d,  $J$  = 16.0 Hz, 1H), 6.49 (dt,  $J$  = 16.0, 5.5 Hz, 1H), 4.79 (d,  $J$  = 5.7 Hz, 2H); **<sup>13</sup>C NMR** (101 MHz, CDCl<sub>3</sub>)  $\delta$  192.1, 159.1, 137.9, 137.1, 131.6, 131.0 (q,  $J$  = 32.1 Hz), 130.3, 129.8, 129.2, 125.9, 124.6 (q,  $J$  = 3.8 Hz), 124.1 (q,  $J$  = 273.4 Hz), 123.9, 123.3 (q,  $J$  = 3.8 Hz), 122.1, 113.0, 68.4; **HRMS** (ESI) Calcd for C<sub>17</sub>H<sub>14</sub>F<sub>3</sub>O<sub>2</sub> [M+H]<sup>+</sup> 307.0940; found 307.0943.

**(E)-3-((3-(2-Methoxyphenyl)allyl)oxy)benzaldehyde**

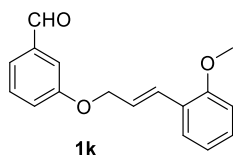

By following the general procedure **A**, the product **1k** was afforded (0.44 g, 55% yield). **<sup>1</sup>H NMR** (400 MHz, CDCl<sub>3</sub>)  $\delta$  9.98 (s, 1H), 7.50–7.42 (m, 4H), 7.28–7.22 (m, 2H), 7.08 (d,  $J$  = 16.0 Hz, 1H), 6.94 (t,  $J$  = 7.5 Hz, 1H), 6.89 (d,  $J$  = 8.2 Hz, 1H), 6.44 (dt,  $J$  = 16.1, 6.0 Hz, 1H), 4.77 (dd,  $J$  = 6.0, 1.5 Hz, 2H), 3.86 (s, 3H); **<sup>13</sup>C NMR** (101 MHz, CDCl<sub>3</sub>)  $\delta$  192.3, 159.4, 157.0, 137.9, 130.2, 129.3, 129.0, 127.4, 125.4, 124.4, 123.6, 122.3, 120.8, 113.5, 111.0, 69.6, 55.6; **HRMS** (ESI) Calcd for C<sub>17</sub>H<sub>17</sub>O<sub>3</sub> [M+H]<sup>+</sup> 269.1172; found 269.1174.

**(E)-3-((3-(2-Fluorophenyl)allyl)oxy)benzaldehyde**

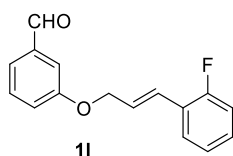

By following the general procedure **A**, the product **1l** was afforded (0.38 g, 49% yield). **<sup>1</sup>H NMR** (400 MHz, CDCl<sub>3</sub>)  $\delta$  9.98 (s, 1H), 7.53–7.42 (m, 4H), 7.28–7.20 (m, 2H), 7.11 (td,  $J$  = 7.6, 1.3 Hz, 1H), 7.05 (ddd,  $J$  = 10.9, 8.2, 1.2 Hz, 1H), 6.91 (d,  $J$  = 16.0 Hz, 1H), 6.51 (dt,  $J$  = 16.1, 5.7 Hz, 1H), 4.78 (dd,  $J$  = 5.7, 1.6 Hz, 2H); **<sup>13</sup>C NMR** (101 MHz, CDCl<sub>3</sub>)  $\delta$  192.2, 160.5 (d,  $J$  = 249.7 Hz), 159.2, 138.0, 130.3, 129.5 (d,  $J$  = 8.4 Hz), 127.8 (d,  $J$  = 3.6 Hz), 126.5 (d,  $J$  = 5.1 Hz), 126.0 (d,  $J$  = 3.5 Hz), 124.3 (d,  $J$  = 3.5 Hz), 124.2 (d,  $J$  = 12.0 Hz), 123.8, 122.2, 115.9 (d,  $J$  = 22.0 Hz), 113.3, 69.0; **HRMS** (ESI) Calcd for C<sub>16</sub>H<sub>14</sub>FO<sub>2</sub> [M+H]<sup>+</sup> 257.0972; found 257.0973.

**(E)-3-((3-(2-Bromophenyl)allyl)oxy)benzaldehyde**

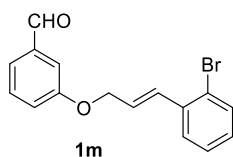

By following the general procedure **A**, the product **1m** was afforded (0.41 g, 43% yield). **<sup>1</sup>H NMR** (400 MHz, CDCl<sub>3</sub>)  $\delta$  9.99 (s, 1H), 7.58–7.53 (m, 2H), 7.51–7.44 (m, 3H), 7.32–7.23 (m, 2H), 7.16–7.08 (m, 2H), 6.35 (dt,  $J$  = 15.9, 5.7 Hz, 1H), 4.80 (dd,  $J$  = 5.7, 1.6 Hz, 2H); **<sup>13</sup>C NMR** (101 MHz, CDCl<sub>3</sub>)  $\delta$  192.2, 159.2, 138.0, 136.4, 133.1, 132.4, 130.3, 129.4, 127.7, 127.4, 126.9, 123.9, 123.8, 122.3, 113.4, 68.7; **HRMS** (ESI) Calcd for C<sub>16</sub>H<sub>14</sub>BrO<sub>2</sub> [M+H]<sup>+</sup> 317.0172; found 317.0171.

**(E)-3-((3-(3,4-Dimethylphenyl)allyl)oxy)benzaldehyde**

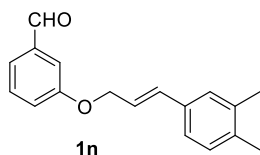

By following the general procedure **A**, the product **1n** was afforded (0.62 g, 77% yield). **<sup>1</sup>H NMR** (400 MHz, CDCl<sub>3</sub>)  $\delta$  9.93 (s, 1H), 7.46–7.38 (m, 3H), 7.24–7.16 (m, 2H), 7.14 (d,  $J$  = 8.0 Hz, 1H), 7.06 (d,  $J$  = 7.8 Hz, 1H), 6.66 (d,  $J$  = 15.9 Hz, 1H), 6.33 (dt,  $J$  = 16.0, 5.9 Hz, 1H), 4.69 (d,  $J$  = 5.8 Hz, 2H), 2.23 (s, 3H), 2.22 (s, 3H); **<sup>13</sup>C NMR** (101 MHz, CDCl<sub>3</sub>)  $\delta$  192.3, 159.4, 137.9, 136.9, 136.8, 134.0, 133.8, 130.2, 130.0, 128.0, 124.2, 123.7, 122.5, 122.3, 113.4, 69.2, 19.9, 19.7; **HRMS** (ESI) Calcd for C<sub>18</sub>H<sub>18</sub>NaO<sub>2</sub> [M+Na]<sup>+</sup> 289.1199; found 289.1199.

### 3-(Allyloxy)benzaldehyde

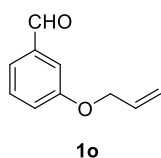

By following the general procedure **A**, the product **1o** was afforded (0.35 g, 71% yield). **<sup>1</sup>H NMR** (400 MHz, CDCl<sub>3</sub>)  $\delta$  9.96 (s, 1H), 7.50–7.36 (m, 3H), 7.23–7.15 (m,  $J$  = 7.0, 2.3 Hz, 1H), 6.12–5.99 (m, 1H), 5.43 (dd,  $J$  = 17.3, 1.8 Hz, 1H), 5.31 (dd,  $J$  = 10.6, 1.7 Hz, 1H), 4.62–4.56 (m, 2H); **<sup>13</sup>C NMR** (101 MHz, CDCl<sub>3</sub>)  $\delta$  192.1, 159.2, 137.8, 132.7, 130.1, 123.6, 122.1, 118.1, 113.2, 69.0; **HRMS** (ESI) Calcd for C<sub>10</sub>H<sub>11</sub>O<sub>2</sub> [M+H]<sup>+</sup> 163.0754; found 163.0737.

### (E)-3-((3-(Trimethylsilyl)allyl)oxy)benzaldehyde

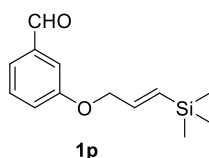

By following the general procedure **A**, the product **1p** was afforded (0.48 g, 68% yield). **<sup>1</sup>H NMR** (400 MHz, CDCl<sub>3</sub>)  $\delta$  9.96 (s, 1H), 7.47–7.40 (m, 2H), 7.38 (d,  $J$  = 2.2 Hz, 1H), 7.19 (dt,  $J$  = 6.7, 2.5 Hz, 1H), 6.21 (dt,  $J$  = 18.8, 4.4 Hz, 1H), 6.08 (d,  $J$  = 18.8 Hz, 1H), 4.60 (d,  $J$  = 4.5 Hz, 2H), 0.09 (s, 9H); **<sup>13</sup>C NMR** (101 MHz, CDCl<sub>3</sub>)  $\delta$  192.3, 159.4, 139.8, 137.9, 133.7, 130.2, 123.6, 122.2, 113.4, 70.9, -1.33 (3C); **HRMS** (ESI) Calcd for C<sub>13</sub>H<sub>17</sub>O<sub>2</sub>Si [M-H]<sup>-</sup> 233.1003; found 233.1033.

### 3-((2-((Benzyloxy)methyl)allyl)oxy)benzaldehyde

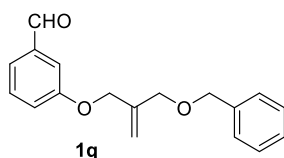

By following the general procedure **B**, the product **1q** was afforded (0.86 g, 76% yield). **<sup>1</sup>H NMR** (400 MHz, CDCl<sub>3</sub>)  $\delta$  9.95 (s, 1H), 7.48–7.40 (m, 3H), 7.36–7.26 (m, 5H), 7.19 (ddd,  $J$  = 7.6, 2.7, 1.7 Hz, 1H), 5.38–5.35 (m, 1H), 5.34–5.32 (m, 1H), 4.64 (s, 2H), 4.54 (s, 2H), 4.13 (s, 2H); **<sup>13</sup>C NMR** (101 MHz, CDCl<sub>3</sub>)  $\delta$  192.2, 159.3, 141.0, 138.1, 137.9, 130.2, 128.5 (2C), 127.8 (3C), 123.6, 122.1, 115.6, 113.5, 72.4, 70.8, 68.8; **HRMS** (ESI) Calcd for C<sub>18</sub>H<sub>19</sub>O<sub>3</sub> [M+H]<sup>+</sup> 283.1329; found 283.1328.

### 3-((2-(((1,1'-Biphenyl)-4-ylmethoxy)methyl)allyl)oxy)benzaldehyde

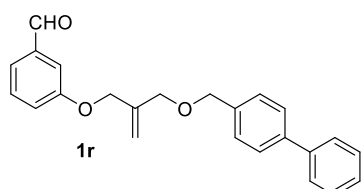

By following the general procedure **B**, the product **1r** was afforded (1.01 g, 71% yield). **<sup>1</sup>H NMR** (400 MHz, CDCl<sub>3</sub>)  $\delta$  9.96 (s, 1H), 7.61–7.55 (m, 4H), 7.48–7.39 (m, 7H), 7.37–7.32 (m, 1H), 7.23–7.18 (m, 1H), 5.38 (s, 1H), 5.36 (s, 1H), 4.66 (s, 2H), 4.59 (s, 2H), 4.16 (s, 2H); **<sup>13</sup>C NMR** (101 MHz, CDCl<sub>3</sub>)  $\delta$  192.2, 159.3, 141.1, 141.0, 140.8, 137.9, 137.2, 130.2, 128.9 (2C), 128.3 (2C), 127.4, 127.3 (2C), 127.2 (2C), 123.7, 122.1, 115.7, 113.5, 72.1, 70.9, 68.9; **HRMS** (ESI) Calcd for C<sub>24</sub>H<sub>23</sub>O<sub>3</sub> [M+H]<sup>+</sup> 359.1642; found 359.1648.

### 3-((2-(((4-Bromobenzyl)oxy)methyl)allyl)oxy)benzaldehyde

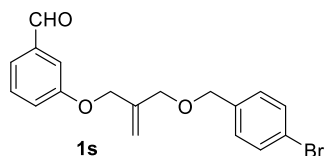

By following the general procedure **B**, the product **1s** was afforded (0.99 g, 69% yield). **<sup>1</sup>H NMR** (400 MHz, CDCl<sub>3</sub>)  $\delta$  9.96 (s, 1H), 7.49–7.40 (m, 5H), 7.23–7.17 (m, 3H), 5.37 (d,  $J$  = 1.6 Hz, 1H), 5.33 (d,  $J$  = 1.2 Hz, 1H), 4.63 (s, 2H), 4.48 (s, 2H), 4.12 (s, 2H); **<sup>13</sup>C NMR** (101 MHz, CDCl<sub>3</sub>)  $\delta$  192.2, 159.2, 140.8, 137.9, 137.1, 131.6 (2C), 130.2, 129.4 (2C), 123.8, 122.1, 121.7, 115.9, 113.3, 71.6, 70.9, 68.8; **HRMS** (ESI) Calcd for C<sub>18</sub>H<sub>18</sub>BrO<sub>3</sub> [M+H]<sup>+</sup> 361.0434; found 361.0433.

### 3-((2-((Naphthalen-2-ylmethoxy)methyl)allyl)oxy)benzaldehyde

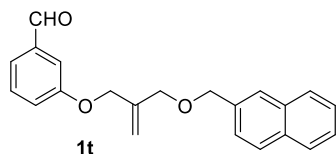

By following the general procedure **B**, the product **1t** was afforded (0.84 g, 63% yield). **<sup>1</sup>H NMR** (400 MHz, CDCl<sub>3</sub>)  $\delta$  9.93 (s, 1H), 7.84–7.75 (m, 4H), 7.50–7.37 (m, 6H), 7.17 (ddd,  $J$  = 7.8, 2.8, 1.4 Hz, 1H), 5.37 (d,  $J$  = 1.6 Hz, 1H), 5.35 (s, 1H), 4.69 (s, 2H),

4.64 (s, 2H), 4.16 (s, 2H);  $^{13}\text{C}$  NMR (101 MHz,  $\text{CDCl}_3$ )  $\delta$  192.2, 159.3, 141.0, 137.9, 135.6, 133.3, 133.1, 130.2, 128.3, 128.0, 127.8, 126.6, 126.3, 126.0, 125.8, 123.6, 122.0, 115.7, 113.6, 72.5, 70.8, 68.8; HRMS (ESI) Calcd for  $\text{C}_{22}\text{H}_{21}\text{O}_3$   $[\text{M}+\text{H}]^+$  333.1485; found 333.1487.

### 3-((2-((Thiophen-2-ylmethoxy)methyl)allyl)oxy)benzaldehyde

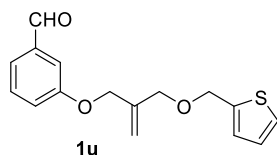

By following the general procedure **B**, the product **1u** was afforded (0.61 g, 52% yield).  $^1\text{H}$  NMR (400 MHz,  $\text{CDCl}_3$ )  $\delta$  9.96 (s, 1H), 7.49–7.39 (m, 3H), 7.28 (dd,  $J$  = 5.0, 1.3 Hz, 1H), 7.19 (ddd,  $J$  = 7.4, 2.7, 1.7 Hz, 1H), 7.02–6.95 (m, 2H), 5.37 (d,  $J$  = 1.6 Hz, 1H), 5.32 (d,  $J$  = 1.2 Hz, 1H), 4.70 (s, 2H), 4.62 (s, 2H), 4.13 (s, 2H);  $^{13}\text{C}$  NMR (101 MHz,  $\text{CDCl}_3$ )  $\delta$  192.2, 159.3, 140.8 (2C), 137.9, 130.2, 126.8, 126.7, 126.1, 123.6, 122.1, 115.8, 113.6, 70.4, 68.8, 66.7; HRMS (ESI) Calcd for  $\text{C}_{16}\text{H}_{17}\text{O}_3\text{S}$   $[\text{M}+\text{H}]^+$  289.0893; found 289.0891.

### 3-((2-((Cyclobutylmethoxy)methyl)allyl)oxy)benzaldehyde

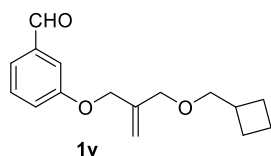

By following the general procedure **B**, the product **1v** was afforded (0.49 g, 47% yield).  $^1\text{H}$  NMR (400 MHz,  $\text{CDCl}_3$ )  $\delta$  9.97 (s, 1H), 7.49–7.39 (m, 3H), 7.24–7.18 (m, 1H), 5.35–5.31 (m, 1H), 5.30–5.26 (m, 1H), 4.61 (s, 2H), 4.07 (s, 2H), 3.42 (d,  $J$  = 6.8 Hz, 2H), 2.65–2.52 (m, 1H), 2.10–2.00 (m, 2H), 1.97–1.81 (m, 2H), 1.80–1.68 (m, 2H);  $^{13}\text{C}$  NMR (101 MHz,  $\text{CDCl}_3$ )  $\delta$  192.2, 159.3, 141.3, 137.8, 130.1, 123.6, 122.1, 115.1, 113.5, 75.1, 71.7, 68.8, 35.2, 25.2 (2C), 18.7; HRMS (ESI) Calcd for  $\text{C}_{16}\text{H}_{21}\text{O}_3$   $[\text{M}+\text{H}]^+$  261.1485; found 261.1488.

### (*E*)-3-(Cinnamyloxy)-4-fluorobenzaldehyde

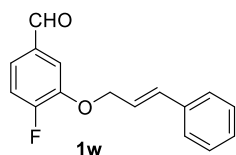

By following the general procedure **A**, the product **1w** was afforded (0.53 g, 69% yield).  $^1\text{H}$  NMR (400 MHz,  $\text{CDCl}_3$ )  $\delta$  9.91 (s, 1H), 7.57 (dd,  $J$  = 8.0, 2.0 Hz, 1H), 7.46 (ddd,  $J$  = 8.2, 4.5, 2.0 Hz, 1H), 7.42 (d,  $J$  = 7.2 Hz, 2H), 7.34 (t,  $J$  = 7.3 Hz, 2H), 7.30–7.22 (m, 2H), 6.78 (d,  $J$  = 15.9 Hz, 1H), 6.42 (dt,  $J$  = 15.9, 6.0 Hz, 1H), 4.84 (d,  $J$  = 5.6 Hz, 2H);  $^{13}\text{C}$  NMR (101 MHz,  $\text{CDCl}_3$ )  $\delta$  190.8, 156.9 (d,  $J$  = 257.5 Hz), 147.7 (d,  $J$  = 11.3

Hz), 136.2, 134.4, 133.3 (d,  $J = 3.2$  Hz), 128.8 (2C), 128.3, 126.8 (2C), 125.6 (d,  $J = 8.4$  Hz), 123.1, 116.9 (d,  $J = 19.7$  Hz), 113.7 (d,  $J = 3.6$  Hz), 70.1; **HRMS** (ESI) Calcd for  $C_{16}H_{14}FO_2$   $[M+H]^+$  257.0972; found 257.0970.

#### (*E*)-4-Chloro-3-(cinnamyloxy)benzaldehyde

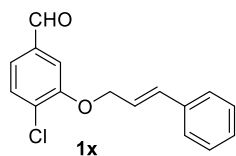

By following the general procedure **A**, the product **1x** was afforded (0.42 g, 51% yield).  **$^1H$  NMR** (400 MHz,  $CDCl_3$ )  $\delta$  9.94 (s, 1H), 7.57 (d,  $J = 7.9$  Hz, 1H), 7.49 (d,  $J = 1.7$  Hz, 1H), 7.45–7.39 (m, 3H), 7.34 (t,  $J = 7.4$  Hz, 2H), 7.30–7.24 (m, 1H), 6.81 (d,  $J = 16.0$  Hz, 1H), 6.43 (dt,  $J = 16.0, 5.7$  Hz, 1H), 4.86 (dd,  $J = 5.8, 1.6$  Hz, 2H);  **$^{13}C$  NMR** (101 MHz,  $CDCl_3$ )  $\delta$  191.1, 154.9, 136.3, 136.1, 134.0, 131.1, 130.4, 128.8 (2C), 128.3, 126.8 (2C), 124.6, 123.1, 111.9, 69.9; **HRMS** (ESI) Calcd for  $C_{16}H_{14}ClO_2$   $[M+H]^+$  273.0677; found 273.0669.

#### (*E*)-3-(Cinnamyloxy)-5-methoxybenzaldehyde

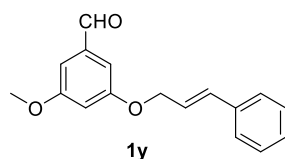

By following the general procedure **A**, the product **1y** was afforded (0.55 g, 68% yield).  **$^1H$  NMR** (400 MHz,  $CDCl_3$ )  $\delta$  9.91 (s, 1H), 7.41 (d,  $J = 6.8$  Hz, 2H), 7.33 (t,  $J = 7.4$  Hz, 2H), 7.30–7.23 (m, 1H), 7.09–7.05 (m, 1H), 7.04–7.01 (m, 1H), 6.79–6.71 (m, 2H), 6.40 (dt,  $J = 15.9, 5.8$  Hz, 1H), 4.73 (dd,  $J = 5.9, 1.5$  Hz, 2H), 3.84 (s, 3H);  **$^{13}C$  NMR** (101 MHz,  $CDCl_3$ )  $\delta$  192.1, 161.4, 160.3, 138.5, 136.3, 133.7, 128.8 (2C), 128.2, 126.7 (2C), 123.7, 108.1, 108.0, 107.4, 69.1, 55.8; **HRMS** (ESI) Calcd for  $C_{17}H_{17}O_3$   $[M+H]^+$  269.1172; found 269.1164.

#### (*E*)-3-(Cinnamyloxy)-5-fluorobenzaldehyde

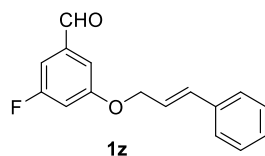

By following the general procedure **A**, the product **1z** was afforded (0.42 g, 54% yield).  **$^1H$  NMR** (400 MHz,  $CDCl_3$ )  $\delta$  9.90 (d,  $J = 1.6$  Hz, 1H), 7.43–7.38 (m, 2H), 7.33 (t,  $J = 7.4$  Hz, 2H), 7.29–7.23 (m, 2H), 7.16 (ddd,  $J = 7.9, 2.4, 1.3$  Hz, 1H), 6.92 (dt,  $J = 10.0, 2.4$  Hz, 1H), 6.74 (d,  $J = 15.9$  Hz, 1H), 6.37 (dt,  $J = 16.0, 5.8$  Hz, 1H), 4.72 (dd,  $J = 5.9, 1.5$  Hz, 2H);  **$^{13}C$  NMR** (101 MHz,  $CDCl_3$ )  $\delta$  190.8 (d,  $J = 2.8$  Hz), 163.8 (d,  $J$

= 248.8 Hz), 160.5 (d,  $J$  = 10.6 Hz), 138.8 (d,  $J$  = 8.0 Hz), 136.1, 134.0, 128.8 (2C), 128.3, 126.7 (2C), 123.1, 111.0 (d,  $J$  = 2.7 Hz), 109.1 (d,  $J$  = 22.5 Hz), 108.9 (d,  $J$  = 25.2 Hz), 69.4; **HRMS** (ESI) Calcd for C<sub>16</sub>H<sub>12</sub>FO<sub>2</sub> [M-H]<sup>-</sup> 255.0827; found 255.0834.

#### (*E*)-3-(Cinnamyloxy)-4,5-difluorobenzaldehyde

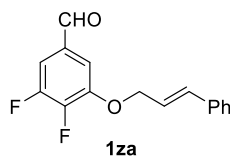

By following the general procedure **A**, the product **1za** was afforded (0.34 g, 41% yield). **<sup>1</sup>H NMR** (400 MHz, CDCl<sub>3</sub>)  $\delta$  9.86 (s, 1H), 7.42 (d,  $J$  = 6.9 Hz, 2H), 7.40–7.27 (m, 5H), 6.78 (d,  $J$  = 15.9 Hz, 1H), 6.41 (dt,  $J$  = 15.9, 6.0 Hz, 1H), 4.86 (d,  $J$  = 5.9 Hz, 2H); **<sup>13</sup>C NMR** (101 MHz, CDCl<sub>3</sub>)  $\delta$  189.7 (d,  $J$  = 2.5 Hz), 151.3 (dd,  $J$  = 251.0, 11.6 Hz), 149.13 (d,  $J$  = 5.5 Hz), 145.7 (dd,  $J$  = 257.1, 11.9 Hz), 136.0, 134.8, 131.8 (dd,  $J$  = 6.1, 3.9 Hz), 128.8 (2C), 128.5, 126.9 (2C), 122.6, 112.0 (d,  $J$  = 18.3 Hz), 110.0 (d,  $J$  = 2.5 Hz), 70.7; **HRMS** (ESI) Calcd for C<sub>16</sub>H<sub>11</sub>F<sub>2</sub>O<sub>2</sub> [M-H]<sup>-</sup> 273.0733; found 273.0736.

#### 4. General Procedure for the Construction via Rh-Catalyzed Enantioselective Twofold C–H Activation

To a 25 mL of Schlenk tube equipped with a magnetic stirring bar were added substrates **1** (0.15 mmol), **2** (0.375 mmol), [Cp\**Rh*Cl<sub>2</sub>]<sub>2</sub> (5 mol%), AgSbF<sub>6</sub> (20 mol%), KH<sub>2</sub>PO<sub>4</sub> (0.225 mmol) and acid (0.3 equiv.) under air. The mixture was then evacuated and backfilled with nitrogen for three times. After that, chiral amine (50 mol%), HFIP (0.9 mL) and DCE (0.9 mL) were added subsequently. After stirring at 60 °C for 36 h, the reaction mixture was cooled to room temperature. The solvent was removed under reduced pressure, and the residue was purified by flash chromatography on silica gel with petroleum ether/ethyl acetate (10 : 1) as the eluent to give the corresponding products **3**.

#### 5. Characterization of Products

##### (*S*)-*N*-(3-Benzyl-4-formyl-2,3-dihydrobenzofuran-5-yl)benzamide

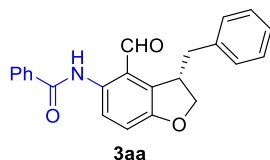

By following the general procedure, the reaction of **1a** (36.0 mg, 0.15 mmol) with **2a** (61.8 mg, 0.375 mmol), [Cp\**Rh*Cl<sub>2</sub>]<sub>2</sub> (4.5 mg, 0.0075 mmol), KH<sub>2</sub>PO<sub>4</sub> (30.6 mg, 0.225 mmol), AgSbF<sub>6</sub> (11.5 mg, 0.03 mmol), (*R*)-(+)-1-(1-naphthyl)ethylamine (12.0  $\mu$ L, 0.075 mmol), and *N*-Phthaloyl-L-Phenylalanine (13.5 mg, 0.045 mmol) afforded **3aa** (46.6 mg, 87% yield). Yellow solid; **<sup>1</sup>H NMR** (400 MHz, CDCl<sub>3</sub>)  $\delta$  11.88 (s, 1H), 9.57 (s, 1H), 8.82 (d,  $J$  = 9.0 Hz, 1H), 8.02 (d,  $J$  = 7.0 Hz, 2H), 7.60–7.47 (m, 3H), 7.36–

7.27 (m, 3H), 7.15 (d,  $J = 9.0$  Hz, 1H), 7.10–7.03 (m, 2H), 4.58–4.47 (m, 2H), 4.00–3.91 (m, 1H), 2.99 (dd,  $J = 13.6, 8.0$  Hz, 1H), 2.90 (dd,  $J = 13.6, 7.5$  Hz, 1H);  $^{13}\text{C}$  NMR (101 MHz,  $\text{CDCl}_3$ )  $\delta$  192.3, 165.8, 155.7, 137.9, 134.94, 134.85, 134.7, 132.0, 129.4 (2C), 129.0 (2C), 128.9 (2C), 127.5 (2C), 127.3, 120.9, 118.9, 117.7, 76.9, 43.0, 42.6; **HRMS** (ESI) Calcd for  $\text{C}_{23}\text{H}_{20}\text{NO}_3$   $[\text{M}+\text{H}]^+$  358.1438; found 358.1436;  $[\alpha]^{18}_{\text{D}} = -24.7$  ( $c = 0.4$ ,  $\text{CHCl}_3$ ); HPLC analysis: ee = 91%; CHIRALPAK®IC (70% hexanes: 30% isopropanol, 1 mL/min)  $t_{\text{minor}} = 13.3$  min,  $t_{\text{major}} = 18.4$  min.

**(S)-N-(4-Formyl-3-(4-methylbenzyl)-2,3-dihydrobenzofuran-5-yl)benzamide**

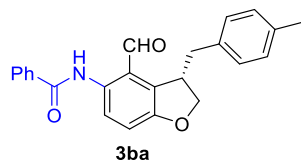

By following the general procedure, the reaction of **1b** (38.0 mg, 0.15 mmol) with **2a** (60.6 mg, 0.375 mmol),  $[\text{Cp}^*\text{RhCl}_2]_2$  (4.5 mg, 0.0075 mmol),  $\text{KH}_2\text{PO}_4$  (30.8 mg, 0.225 mmol),  $\text{AgSbF}_6$  (11.9 mg, 0.03 mmol), (R)-(+)-1-(1-naphthyl)ethylamine (12.0  $\mu\text{L}$ , 0.075 mmol), and *N*-Phthaloyl-L-Phenylalanine (13.2 mg, 0.045 mmol) afforded **3ba** (41.4 mg, 74% yield). Yellow solid;  $^1\text{H}$  NMR (400 MHz,  $\text{CDCl}_3$ )  $\delta$  11.90 (s, 1H), 9.70 (s, 1H), 8.82 (d,  $J = 8.9$  Hz, 1H), 8.07–8.03 (m, 2H), 7.59–7.49 (m, 3H), 7.15 (d,  $J = 9.0$  Hz, 1H), 7.12 (d,  $J = 7.8$  Hz, 2H), 6.97 (d,  $J = 7.9$  Hz, 2H), 4.54 (dd,  $J = 9.0, 2.1$  Hz, 1H), 4.49 (dd,  $J = 9.0, 7.1$  Hz, 1H), 3.96 (qd,  $J = 7.4, 2.0$  Hz, 1H), 2.97–2.85 (m, 2H), 2.34 (s, 3H);  $^{13}\text{C}$  NMR (101 MHz,  $\text{CDCl}_3$ )  $\delta$  192.5, 165.8, 155.7, 136.9, 135.2, 134.9, 134.8 (2C), 132.0, 129.7 (2C), 129.3 (2C), 128.9 (2C), 127.5 (2C), 120.9, 118.9, 117.7, 76.8, 43.0, 42.3, 21.2; **HRMS** (ESI) Calcd for  $\text{C}_{24}\text{H}_{22}\text{NO}_3$   $[\text{M}+\text{H}]^+$  372.1594; found 372.1623;  $[\alpha]^{18}_{\text{D}} = -52.0$  ( $c = 0.4$ ,  $\text{CHCl}_3$ ); HPLC analysis: ee = 90%; CHIRALPAK®IC (80% hexanes: 20% isopropanol, 1 mL/min)  $t_{\text{minor}} = 16.1$  min,  $t_{\text{major}} = 20.0$  min.

**(S)-N-(3-(4-Fluorobenzyl)-4-formyl-2,3-dihydrobenzofuran-5-yl)benzamide**

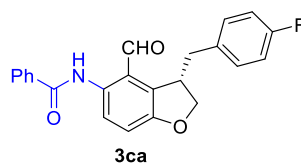

By following the general procedure, the reaction of **1c** (38.6 mg, 0.15 mmol) with **2a** (60.6 mg, 0.375 mmol),  $[\text{Cp}^*\text{RhCl}_2]_2$  (4.5 mg, 0.0075 mmol),  $\text{KH}_2\text{PO}_4$  (30.5 mg, 0.225 mmol),  $\text{AgSbF}_6$  (11.0 mg, 0.03 mmol), (R)-(+)-1-(1-naphthyl)ethylamine (12.0  $\mu\text{L}$ , 0.075 mmol), and *N*-Phthaloyl-L-Phenylalanine (13.2 mg, 0.045 mmol) afforded **3ca** (40.7 mg, 72% yield). Yellow solid;  $^1\text{H}$  NMR (400 MHz,  $\text{CDCl}_3$ )  $\delta$  11.86 (s, 1H), 9.70 (s, 1H), 8.82 (d,  $J = 9.0$  Hz, 1H), 8.03 (d,  $J = 7.4$  Hz, 2H), 7.60–7.49 (m, 3H), 7.15 (d,  $J = 9.0$  Hz, 1H), 7.07–6.96 (m, 4H), 4.56–4.46 (m, 2H), 4.01–3.91 (m, 1H), 3.00–2.86 (m, 2H);  $^{13}\text{C}$  NMR (101 MHz,  $\text{CDCl}_3$ )  $\delta$  192.2, 165.9, 162.1 (d,  $J = 246.1$  Hz), 155.7, 135.0, 134.71, 134.70, 133.6 (d,  $J = 3.3$  Hz), 132.1, 130.9 (d,  $J = 8.0$  Hz, 2C), 129.0

(2C), 127.5 (2C), 121.1, 118.8, 117.8, 115.9 (d,  $J = 21.4$  Hz, 2C), 76.7, 42.9, 41.7; **HRMS** (ESI) Calcd for  $C_{23}H_{19}FNO_3$   $[M+H]^+$  376.1343; found 376.1335;  $[\alpha]^{18}_D = -44.2$  ( $c = 0.4$ ,  $CHCl_3$ ); HPLC analysis: ee = 91%; CHIRALPAK®IC (80% hexanes: 20% isopropanol, 1 mL/min)  $t_{minor} = 17.0$  min,  $t_{major} = 21.5$  min.

**(S)-N-(3-(4-Chlorobenzyl)-4-formyl-2,3-dihydrobenzofuran-5-yl)benzamide**

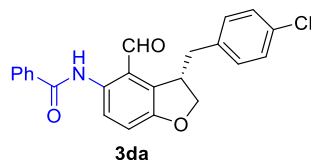

By following the general procedure, the reaction of **1d** (41.0 mg, 0.15 mmol) with **2a** (60.8 mg, 0.375 mmol),  $[Cp^*RhCl_2]_2$  (4.6 mg, 0.0075 mmol),  $KH_2PO_4$  (30.7 mg, 0.225 mmol),  $AgSbF_6$  (10.8 mg, 0.03 mmol), (R)-(+)-1-(1-naphthyl)ethylamine (12.0  $\mu$ L, 0.075 mmol), and *N*-Phthaloyl-L-Phenylalanine (13.5 mg, 0.045 mmol) afforded **3da** (45.4 mg, 77% yield). Yellow solid;  **$^1H$  NMR** (400 MHz,  $CDCl_3$ )  $\delta$  11.85 (s, 1H), 9.80 (s, 1H), 8.81 (d,  $J = 9.0$  Hz, 1H), 8.08–8.01 (m, 2H), 7.60–7.49 (m, 3H), 7.30–7.25 (m, 2H), 7.14 (d,  $J = 9.0$  Hz, 1H), 7.01 (d,  $J = 8.1$  Hz, 2H), 4.52–4.45 (m, 2H), 4.01–3.92 (m, 1H), 2.91 (d,  $J = 7.5$  Hz, 2H);  **$^{13}C$  NMR** (101 MHz,  $CDCl_3$ )  $\delta$  192.2, 165.8, 155.7, 136.3, 135.0, 134.7, 134.6, 133.2, 132.1, 130.7 (2C), 129.1 (2C), 129.0 (2C), 127.5 (2C), 121.2, 118.7, 117.9, 76.5, 42.6, 41.8; **HRMS** (ESI) Calcd for  $C_{23}H_{19}ClNO_3$   $[M+H]^+$  392.1048; found 392.1037;  $[\alpha]^{18}_D = -49.4$  ( $c = 0.4$ ,  $CHCl_3$ ); HPLC analysis: ee = 90%; CHIRALPAK®IC (80% hexanes: 20% isopropanol, 1 mL/min)  $t_{minor} = 17.2$  min,  $t_{major} = 21.3$  min.

**(S)-N-(4-Formyl-3-(4-(trifluoromethyl)benzyl)-2,3-dihydrobenzofuran-5-yl)benzamide**

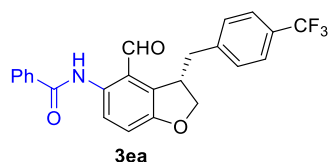

By following the general procedure, the reaction of **1e** (46.6 mg, 0.15 mmol) with **2a** (60.8 mg, 0.375 mmol),  $[Cp^*RhCl_2]_2$  (4.5 mg, 0.0075 mmol),  $KH_2PO_4$  (30.6 mg, 0.225 mmol),  $AgSbF_6$  (11.3 mg, 0.03 mmol), (R)-(+)-1-(1-naphthyl)ethylamine (12.0  $\mu$ L, 0.075 mmol), and *N*-Phthaloyl-L-Phenylalanine (13.1 mg, 0.045 mmol) afforded **3ea** (42.2 mg, 66% yield). Yellow solid;  **$^1H$  NMR** (400 MHz,  $CDCl_3$ )  $\delta$  11.83 (s, 1H), 9.88 (s, 1H), 8.82 (dd,  $J = 9.0, 1.5$  Hz, 1H), 8.06–8.00 (m, 2H), 7.61–7.49 (m, 5H), 7.22 (d,  $J = 7.9$  Hz, 2H), 7.15 (dd,  $J = 9.0, 1.6$  Hz, 1H), 4.52–4.44 (m, 2H), 4.08–3.99 (m, 1H), 3.07–2.94 (m, 2H);  **$^{13}C$  NMR** (101 MHz,  $CDCl_3$ )  $\delta$  192.0, 165.9, 155.7, 142.0, 135.1, 134.6, 134.4, 132.1, 129.7 (2C), 129.6 (q,  $J = 32.6$  Hz), 129.0 (2C), 127.5 (2C), 125.9 (q,  $J = 3.8$  Hz, 2C), 124.2 (q,  $J = 272.1$  Hz), 121.3, 118.6, 118.0, 76.2, 42.4, 42.2; **HRMS** (ESI) Calcd for  $C_{24}H_{19}F_3NO_3$   $[M+H]^+$  426.1312; found 426.1330;  $[\alpha]^{18}_D = -$

68.9 (c = 0.4, CHCl<sub>3</sub>); HPLC analysis: ee = 92%; CHIRALPAK®IC (80% hexanes: 20% isopropanol, 1 mL/min)  $t_{\text{minor}}$  = 12.1 min,  $t_{\text{major}}$  = 14.4 min.

**(S)-N-(4-Formyl-3-(3-methoxybenzyl)-2,3-dihydrobenzofuran-5-yl)benzamide**

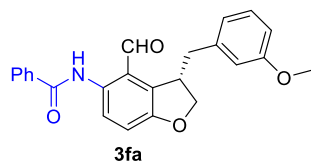

By following the general procedure, the reaction of **1f** (40.7 mg, 0.15 mmol) with **2a** (60.8 mg, 0.375 mmol), [Cp\*RhCl<sub>2</sub>]<sub>2</sub> (4.7 mg, 0.0075 mmol), KH<sub>2</sub>PO<sub>4</sub> (30.7 mg, 0.225 mmol), AgSbF<sub>6</sub> (11.1 mg, 0.03 mmol), (R)-(+)-1-(1-naphthyl)ethylamine (12.0 μL, 0.075 mmol), and *N*-Phthaloyl-L-Phenylalanine (13.3 mg, 0.045 mmol) afforded **3fa** (43.6 mg, 75% yield). Yellow solid; <sup>1</sup>H NMR (400 MHz, CDCl<sub>3</sub>) δ 11.90 (s, 1H), 9.62 (s, 1H), 8.83 (d, *J* = 9.0 Hz, 1H), 8.03 (d, *J* = 6.6 Hz, 2H), 7.60–7.48 (m, 3H), 7.23 (t, *J* = 7.9 Hz, 1H), 7.16 (d, *J* = 9.0 Hz, 1H), 6.83 (dd, *J* = 8.2, 2.6 Hz, 1H), 6.68 (d, *J* = 7.5 Hz, 1H), 6.59 (s, 1H), 4.58–4.48 (m, 2H), 3.96 (qd, *J* = 7.5, 2.3 Hz, 1H), 3.76 (s, 3H), 3.00–2.84 (m, 2H); <sup>13</sup>C NMR (101 MHz, CDCl<sub>3</sub>) δ 192.5, 165.8, 160.1, 155.7, 139.5, 135.0, 134.9, 134.8, 132.1, 130.1, 128.9 (2C), 127.5 (2C), 121.7, 121.0, 119.0, 117.7, 115.3, 112.5, 76.9, 55.3, 42.9, 42.7; HRMS (ESI) Calcd for C<sub>24</sub>H<sub>22</sub>NO<sub>4</sub> [M+H]<sup>+</sup> 388.1543; found 388.1542; [α]<sub>D</sub><sup>18</sup> = -52.0 (c = 0.4, CHCl<sub>3</sub>); HPLC analysis: ee = 90%; CHIRALPAK®IC (70% hexanes: 30% isopropanol, 1 mL/min)  $t_{\text{minor}}$  = 14.9 min,  $t_{\text{major}}$  = 21.2 min.

**(S)-N-(4-Formyl-3-(3-methylbenzyl)-2,3-dihydrobenzofuran-5-yl)benzamide**

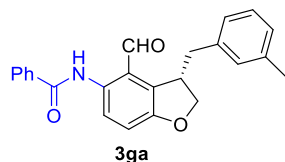

By following the general procedure, the reaction of **1g** (38.7 mg, 0.15 mmol) with **2a** (61.7 mg, 0.375 mmol), [Cp\*RhCl<sub>2</sub>]<sub>2</sub> (4.7 mg, 0.0075 mmol), KH<sub>2</sub>PO<sub>4</sub> (30.5 mg, 0.225 mmol), AgSbF<sub>6</sub> (11.0 mg, 0.03 mmol), (R)-(+)-1-(1-naphthyl)ethylamine (12.0 μL, 0.075 mmol), and *N*-Phthaloyl-L-Phenylalanine (13.2 mg, 0.045 mmol) afforded **3ga** (40.4 mg, 73% yield). Yellow solid; <sup>1</sup>H NMR (400 MHz, CDCl<sub>3</sub>) δ 11.90 (s, 1H), 9.58 (s, 1H), 8.82 (d, *J* = 9.0 Hz, 1H), 8.03 (d, *J* = 6.2 Hz, 2H), 7.59–7.47 (m, 3H), 7.20 (t, *J* = 7.7 Hz, 1H), 7.15 (d, *J* = 9.0 Hz, 1H), 7.09 (d, *J* = 7.6 Hz, 1H), 6.90–6.84 (m, 2H), 4.57–4.46 (m, 2H), 3.99–3.89 (m, 1H), 2.98–2.82 (m, 2H), 2.31 (s, 3H); <sup>13</sup>C NMR (101 MHz, CDCl<sub>3</sub>) δ 192.5, 165.8, 155.7, 138.7, 137.9, 135.1, 134.9, 134.8, 132.0, 130.2, 128.9 (3C), 128.0, 127.5 (2C), 126.4, 120.9, 119.0, 117.7, 76.9, 43.1, 42.6, 21.5; HRMS (ESI) Calcd for C<sub>24</sub>H<sub>22</sub>NO<sub>3</sub> [M+H]<sup>+</sup> 372.1594; found 372.1607; [α]<sub>D</sub><sup>18</sup> = -48.1 (c = 0.4, CHCl<sub>3</sub>); HPLC analysis: ee = 88%; CHIRALPAK®IC (80% hexanes: 20% isopropanol, 1 mL/min)  $t_{\text{minor}}$  = 14.8 min,  $t_{\text{major}}$  = 20.2 min.

**(S)-N-(3-(3-Fluorobenzyl)-4-formyl-2,3-dihydrobenzofuran-5-yl)benzamide**

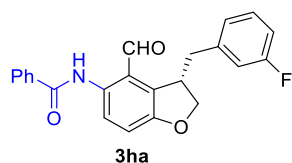

By following the general procedure, the reaction of **1h** (39.3 mg, 0.15 mmol) with **2a** (62.0 mg, 0.375 mmol), [Cp\*RhCl<sub>2</sub>]<sub>2</sub> (4.6 mg, 0.0075 mmol), KH<sub>2</sub>PO<sub>4</sub> (30.7 mg, 0.225 mmol), AgSbF<sub>6</sub> (11.9 mg, 0.03 mmol), (R)-(+)-1-(1-naphthyl)ethylamine (12.0 μL, 0.075 mmol), and *N*-Phthaloyl-L-Phenylalanine (13.6 mg, 0.045 mmol) afforded **3ha** (39.6 mg, 70% yield). Yellow solid; <sup>1</sup>H NMR (400 MHz, CDCl<sub>3</sub>) δ 11.85 (s, 1H), 9.70 (s, 1H), 8.82 (d, *J* = 9.0 Hz, 1H), 8.03 (d, *J* = 6.8 Hz, 2H), 7.59–7.48 (m, 3H), 7.31–7.23 (m, 1H), 7.15 (d, *J* = 9.0 Hz, 1H), 7.01–6.94 (m, 1H), 6.87–6.78 (m, 2H), 4.54–4.46 (m, 2H), 4.02–3.93 (m, 1H), 3.00–2.87 (m, 2H); <sup>13</sup>C NMR (101 MHz, CDCl<sub>3</sub>) δ 192.2, 165.8, 163.1 (d, *J* = 247.2 Hz), 155.7, 140.4 (d, *J* = 7.1 Hz), 135.0, 134.7, 134.5, 132.1, 130.6 (d, *J* = 8.3 Hz), 128.9 (2C), 127.5 (2C), 125.1 (d, *J* = 3.0 Hz), 121.2, 118.8, 117.9, 116.2 (d, *J* = 21.1 Hz), 114.2 (d, *J* = 21.0 Hz), 76.6, 42.6, 42.2 (d, *J* = 1.8 Hz); HRMS (ESI) Calcd for C<sub>23</sub>H<sub>19</sub>FNO<sub>3</sub> [M+H]<sup>+</sup> 376.1343; found 376.1329; [α]<sup>18</sup><sub>D</sub> = -65.0 (c = 0.4, CHCl<sub>3</sub>); HPLC analysis: ee = 92%; CHIRALPAK®IC (80% hexanes: 20% isopropanol, 1 mL/min) *t*<sub>minor</sub> = 17.5 min, *t*<sub>major</sub> = 22.1 min.

**(S)-N-(3-(3-Chlorobenzyl)-4-formyl-2,3-dihydrobenzofuran-5-yl)benzamide**

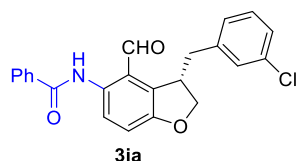

By following the general procedure, the reaction of **1i** (41.0 mg, 0.15 mmol) with **2a** (60.9 mg, 0.375 mmol), [Cp\*RhCl<sub>2</sub>]<sub>2</sub> (4.4 mg, 0.0075 mmol), KH<sub>2</sub>PO<sub>4</sub> (30.7 mg, 0.225 mmol), AgSbF<sub>6</sub> (13.5 mg, 0.03 mmol), (R)-(+)-1-(1-naphthyl)ethylamine (12.0 μL, 0.075 mmol), and *N*-Phthaloyl-L-Phenylalanine (13.2 mg, 0.045 mmol) afforded **3ia** (50.2 mg, 85% yield). Yellow solid; <sup>1</sup>H NMR (400 MHz, CDCl<sub>3</sub>) δ 11.87 (s, 1H), 9.73 (s, 1H), 8.84 (d, *J* = 9.0 Hz, 1H), 8.07–8.01 (m, 2H), 7.60–7.49 (m, 3H), 7.30–7.22 (m, 2H), 7.17 (d, *J* = 9.0 Hz, 1H), 7.12–7.09 (m, 1H), 6.95 (dt, *J* = 6.9, 1.7 Hz, 1H), 4.54–4.48 (m, 2H), 4.02–3.94 (m, 1H), 2.99–2.87 (m, 2H); <sup>13</sup>C NMR (101 MHz, CDCl<sub>3</sub>) δ 192.2, 165.9, 155.7, 139.9, 135.1, 134.9, 134.7, 134.5, 132.1, 130.3, 129.5, 129.0 (2C), 127.6, 127.5 (3C), 121.3, 118.8, 118.0, 76.6, 42.7, 42.1; HRMS (ESI) Calcd for C<sub>23</sub>H<sub>19</sub>ClNO<sub>3</sub> [M+H]<sup>+</sup> 392.1048; found 392.1036; [α]<sup>18</sup><sub>D</sub> = -7.8 (c = 0.2, CHCl<sub>3</sub>); HPLC analysis: ee = 93%; CHIRALPAK®IC (80% hexanes: 20% isopropanol, 1 mL/min) *t*<sub>minor</sub> = 17.0 min, *t*<sub>major</sub> = 22.0 min.

**(S)-N-(4-Formyl-3-(3-(trifluoromethyl)benzyl)-2,3-dihydrobenzofuran-5-yl)benzamide**

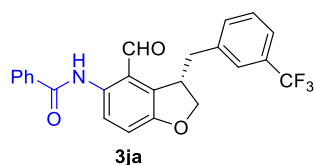

By following the general procedure, the reaction of **1j** (46.0 mg, 0.15 mmol) with **2a** (61.9 mg, 0.375 mmol), [Cp\*RhCl<sub>2</sub>]<sub>2</sub> (4.6 mg, 0.0075 mmol), KH<sub>2</sub>PO<sub>4</sub> (31.5 mg, 0.225 mmol), AgSbF<sub>6</sub> (10.9 mg, 0.03 mmol), (R)-(+)-1-(1-naphthyl)ethylamine (12.0  $\mu$ L, 0.075 mmol), and *N*-Phthaloyl-L-Phenylalanine (13.4 mg, 0.045 mmol) afforded **3ja** (39.0 mg, 61% yield). Yellow solid; <sup>1</sup>H NMR (400 MHz, CDCl<sub>3</sub>)  $\delta$  11.82 (s, 1H), 9.69 (s, 1H), 8.84 (d, *J* = 9.0 Hz, 1H), 8.05–8.00 (m, 2H), 7.60–7.49 (m, 4H), 7.45 (t, *J* = 7.7 Hz, 1H), 7.31–7.26 (m, 2H), 7.18 (d, *J* = 9.0 Hz, 1H), 4.56–4.49 (m, 2H), 4.05–3.97 (m, 1H), 3.09–2.96 (m, 2H); <sup>13</sup>C NMR (101 MHz, CDCl<sub>3</sub>)  $\delta$  191.9, 165.9, 155.6, 138.8, 135.1, 134.7, 134.2, 132.8, 132.1, 131.4 (q, *J* = 32.3 Hz), 129.5, 129.0 (2C), 127.5 (2C), 126.2 (q, *J* = 3.7 Hz), 124.2 (q, *J* = 3.8 Hz), 124.0 (q, *J* = 273.8 Hz), 121.4, 118.8, 118.0, 76.5, 42.6, 42.1; HRMS (ESI) Calcd for C<sub>24</sub>H<sub>19</sub>F<sub>3</sub>NO<sub>3</sub> [M+H]<sup>+</sup> 426.1312; found 426.1324; [ $\alpha$ ]<sup>18</sup><sub>D</sub> = -15.6 (c = 0.4, CHCl<sub>3</sub>); HPLC analysis: ee = 90%; CHIRALPAK®IC (70% hexanes: 30% isopropanol, 1 mL/min) *t*<sub>minor</sub> = 9.9 min, *t*<sub>major</sub> = 11.1 min.

**(S)-N-(4-Formyl-3-(2-methoxybenzyl)-2,3-dihydrobenzofuran-5-yl)benzamide**

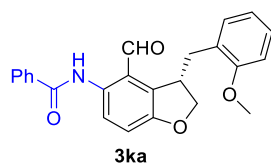

By following the general procedure, the reaction of **1k** (41.1 mg, 0.15 mmol) with **2a** (61.1 mg, 0.375 mmol), [Cp\*RhCl<sub>2</sub>]<sub>2</sub> (4.6 mg, 0.0075 mmol), KH<sub>2</sub>PO<sub>4</sub> (30.7 mg, 0.225 mmol), AgSbF<sub>6</sub> (11.0 mg, 0.03 mmol), (R)-(+)-1-(1-naphthyl)ethylamine (12.0  $\mu$ L, 0.075 mmol), and *N*-Phthaloyl-L-Phenylalanine (13.4 mg, 0.045 mmol) afforded **3ka** (29.8 mg, 51% yield). Yellow solid; <sup>1</sup>H NMR (400 MHz, CDCl<sub>3</sub>)  $\delta$  11.95 (s, 1H), 9.90 (s, 1H), 8.81 (d, *J* = 8.9 Hz, 1H), 8.05 (d, *J* = 6.5 Hz, 2H), 7.57–7.49 (m, 3H), 7.33–7.27 (m, 1H), 7.15 (d, *J* = 9.0 Hz, 1H), 6.98 (dd, *J* = 7.3, 1.8 Hz, 1H), 6.89 (t, *J* = 7.7 Hz, 2H), 4.56 (dd, *J* = 9.0, 1.7 Hz, 1H), 4.49–4.43 (m, 1H), 4.12–4.05 (m, 1H), 3.86 (s, 3H), 2.95 (dd, *J* = 13.2, 6.1 Hz, 1H), 2.88 (dd, *J* = 13.3, 8.8 Hz, 1H); <sup>13</sup>C NMR (101 MHz, CDCl<sub>3</sub>)  $\delta$  193.6, 165.8, 157.8, 155.7, 136.1, 134.9, 134.8, 132.0, 131.2, 128.9 (2C), 128.8, 127.5 (2C), 126.6, 120.8, 120.7, 119.0, 117.5, 110.5, 77.0, 55.5, 40.8, 38.2; HRMS (ESI) Calcd for C<sub>24</sub>H<sub>22</sub>NO<sub>4</sub> [M+H]<sup>+</sup> 388.1543; found 388.1547; [ $\alpha$ ]<sup>18</sup><sub>D</sub> = +50.7 (c = 0.4, CHCl<sub>3</sub>); HPLC analysis: ee = 73%; CHIRALPAK®IC (70% hexanes: 30% isopropanol, 1 mL/min) *t*<sub>minor</sub> = 11.7 min, *t*<sub>major</sub> = 15.7 min.

**(S)-N-(3-(2-Fluorobenzyl)-4-formyl-2,3-dihydrobenzofuran-5-yl)benzamide**

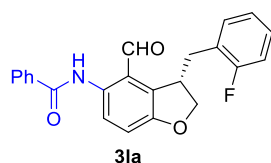

By following the general procedure, the reaction of **1l** (38.6 mg, 0.15 mmol) with **2a** (60.8 mg, 0.375 mmol), [Cp\*RhCl<sub>2</sub>]<sub>2</sub> (4.7 mg, 0.0075 mmol), KH<sub>2</sub>PO<sub>4</sub> (30.8 mg, 0.225 mmol), AgSbF<sub>6</sub> (11.3 mg, 0.03 mmol), (R)-(+)-1-(1-naphthyl)ethylamine (12.0  $\mu$ L, 0.075 mmol), and *N*-Phthaloyl-L-Phenylalanine (13.2 mg, 0.045 mmol) afforded **3la** (35.8 mg, 64% yield). Yellow solid; <sup>1</sup>H NMR (400 MHz, CDCl<sub>3</sub>)  $\delta$  11.91 (s, 1H), 9.85 (s, 1H), 8.84 (d, *J* = 9.0 Hz, 1H), 8.06–8.01 (m, 2H), 7.59–7.49 (m, 3H), 7.32–7.25 (m, 1H), 7.17 (d, *J* = 9.0 Hz, 1H), 7.12–7.04 (m, 2H), 7.01 (td, *J* = 7.4, 1.8 Hz, 1H), 4.55 (dd, *J* = 9.1, 1.9 Hz, 1H), 4.49 (dd, *J* = 9.1, 7.1 Hz, 1H), 4.10–4.02 (m, 1H), 2.97 (d, *J* = 7.5 Hz, 2H); <sup>13</sup>C NMR (101 MHz, CDCl<sub>3</sub>)  $\delta$  192.6, 165.8, 161.6 (d, *J* = 245.3 Hz), 155.6, 135.1, 135.0, 134.8, 132.1, 131.7 (d, *J* = 4.6 Hz), 129.3 (d, *J* = 8.2 Hz), 129.0 (2C), 127.5 (2C), 125.1 (d, *J* = 15.5 Hz), 124.6 (d, *J* = 3.6 Hz), 121.1, 118.8, 117.8, 115.8 (d, *J* = 21.6 Hz), 76.7, 41.3 (d, *J* = 1.8 Hz), 36.4; HRMS (ESI) Calcd for C<sub>23</sub>H<sub>19</sub>FN<sub>3</sub> [M+H]<sup>+</sup> 376.1343; found 376.1320; [ $\alpha$ ]<sup>18</sup><sub>D</sub> = -15.6 (c = 0.4, CHCl<sub>3</sub>); HPLC analysis: ee = 85%; CHIRALPAK®IC (80% hexanes: 20% isopropanol, 1 mL/min) *t*<sub>minor</sub> = 16.8 min, *t*<sub>major</sub> = 18.8 min.

**(S)-N-(3-(2-Bromobenzyl)-4-formyl-2,3-dihydrobenzofuran-5-yl)benzamide**

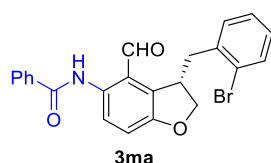

By following the general procedure, the reaction of **1m** (48.1 mg, 0.15 mmol) with **2a** (60.7 mg, 0.375 mmol), [Cp\*RhCl<sub>2</sub>]<sub>2</sub> (5.0 mg, 0.0075 mmol), KH<sub>2</sub>PO<sub>4</sub> (30.7 mg, 0.225 mmol), AgSbF<sub>6</sub> (10.9 mg, 0.03 mmol), (R)-(+)-1-(1-naphthyl)ethylamine (12.0  $\mu$ L, 0.075 mmol), and *N*-Phthaloyl-L-Phenylalanine (13.2 mg, 0.045 mmol) afforded **3ma** (28.9 mg, 44% yield). Yellow solid; <sup>1</sup>H NMR (400 MHz, CDCl<sub>3</sub>)  $\delta$  11.90 (s, 1H), 9.72 (d, *J* = 0.7 Hz, 1H), 8.84 (d, *J* = 9.0 Hz, 1H), 8.05–8.00 (m, 2H), 7.60 (dd, *J* = 7.8, 1.5 Hz, 1H), 7.58–7.48 (m, 3H), 7.25–7.14 (m, 3H), 6.97 (dd, *J* = 7.4, 1.9 Hz, 1H), 4.56 (dd, *J* = 9.1, 1.6 Hz, 1H), 4.49 (dd, *J* = 9.0, 7.1 Hz, 1H), 4.22–4.14 (m, 1H), 3.09 (dd, *J* = 13.5, 8.3 Hz, 1H), 3.01 (dd, *J* = 13.5, 7.6 Hz, 1H); <sup>13</sup>C NMR (101 MHz, CDCl<sub>3</sub>)  $\delta$  192.8, 165.8, 155.7, 137.2, 135.0, 134.9, 134.8, 133.4, 132.3, 132.1, 129.2, 128.9 (2C), 127.9, 127.5 (2C), 125.0, 121.1, 119.1, 117.7, 76.5, 42.5, 40.4; HRMS (ESI) Calcd for C<sub>23</sub>H<sub>19</sub>BrN<sub>3</sub> [M+H]<sup>+</sup> 436.0543; found 436.0570; [ $\alpha$ ]<sup>18</sup><sub>D</sub> = +55.5 (c = 0.4, CHCl<sub>3</sub>); HPLC analysis: ee = 83%; CHIRALPAK®IC (80% hexanes: 20% isopropanol, 1 mL/min) *t*<sub>minor</sub> = 16.5 min, *t*<sub>major</sub> = 22.4 min.

**(S)-N-(3-(3,4-Dimethylbenzyl)-4-formyl-2,3-dihydrobenzofuran-5-yl)benzamide**

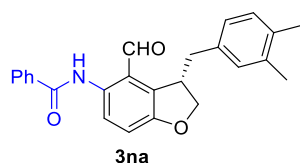

By following the general procedure, the reaction of **1n** (40.1 mg, 0.15 mmol) with **2a** (62.1 mg, 0.375 mmol), [Cp\*RhCl<sub>2</sub>]<sub>2</sub> (4.6 mg, 0.0075 mmol), KH<sub>2</sub>PO<sub>4</sub> (30.8 mg, 0.225 mmol), AgSbF<sub>6</sub> (11.3 mg, 0.03 mmol), (R)-(+)-1-(1-naphthyl)ethylamine (12.0  $\mu$ L, 0.075 mmol), and *N*-Phthaloyl-L-Phenylalanine (13.3 mg, 0.045 mmol) afforded **3na** (33.6 mg, 58% yield). Yellow solid; **<sup>1</sup>H NMR** (400 MHz, CDCl<sub>3</sub>)  $\delta$  11.91 (s, 1H), 9.72 (s, 1H), 8.82 (d, *J* = 9.0 Hz, 1H), 8.07–8.00 (m, 2H), 7.60–7.48 (m, 3H), 7.15 (d, *J* = 9.0 Hz, 1H), 7.07 (d, *J* = 7.6 Hz, 1H), 6.87–6.80 (m, 2H), 4.54 (dd, *J* = 9.0, 2.0 Hz, 1H), 4.48 (dd, *J* = 9.0, 7.2 Hz, 1H), 3.99–3.90 (m, 1H), 2.87 (d, *J* = 7.7 Hz, 2H), 2.25 (s, 3H), 2.22 (s, 3H); **<sup>13</sup>C NMR** (101 MHz, CDCl<sub>3</sub>)  $\delta$  192.7, 165.8, 155.7, 137.3, 135.5, 135.34, 135.32, 134.9, 134.8, 132.0, 130.7, 130.2, 128.9 (2C), 127.5 (2C), 126.7, 120.9, 118.9, 117.7, 76.8, 43.1, 42.3, 19.9, 19.6; **HRMS** (ESI) Calcd for C<sub>25</sub>H<sub>24</sub>NO<sub>3</sub> [M+H]<sup>+</sup> 386.1751; found 386.1775; [ $\alpha$ ]<sup>18</sup><sub>D</sub> = +26.0 (c = 0.4, CHCl<sub>3</sub>); HPLC analysis: ee = 90%; CHIRALPAK®IC (80% hexanes: 20% isopropanol, 1 mL/min) *t*<sub>minor</sub> = 15.1 min, *t*<sub>major</sub> = 20.1 min.

**(S)-N-(4-Formyl-3-methyl-2,3-dihydrobenzofuran-5-yl)benzamide**

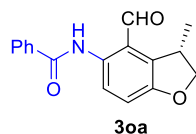

By following a modified procedure at 70 °C for 24 h, the reaction of **1o** (25.6 mg, 0.15 mmol) with **2a** (61.1 mg, 0.375 mmol), [Cp\*RhCl<sub>2</sub>]<sub>2</sub> (4.5 mg, 0.0075 mmol), KH<sub>2</sub>PO<sub>4</sub> (31.1 mg, 0.225 mmol), AgSbF<sub>6</sub> (13.4 mg, 0.03 mmol), (R)-(+)-1-(1-naphthyl)ethylamine (12.0  $\mu$ L, 0.075 mmol), and *N*-Phthaloyl-L-Phenylalanine (13.3 mg, 0.045 mmol) afforded **3oa** (12.7 mg, 30% yield). Yellow solid; **<sup>1</sup>H NMR** (400 MHz, CDCl<sub>3</sub>)  $\delta$  11.91 (s, 1H), 10.26 (s, 1H), 8.79 (d, *J* = 9.0 Hz, 1H), 8.08–8.03 (m, 2H), 7.60–7.50 (m, 3H), 7.13 (d, *J* = 8.9 Hz, 1H), 4.66 (t, *J* = 8.4 Hz, 1H), 4.36 (dd, *J* = 8.8, 2.7 Hz, 1H), 3.99–3.89 (m, 1H), 1.43 (d, *J* = 7.1 Hz, 3H); **<sup>13</sup>C NMR** (101 MHz, CDCl<sub>3</sub>)  $\delta$  193.1, 165.9, 155.5, 137.3, 135.1, 134.8, 132.1, 129.0 (2C), 127.5 (2C), 120.9, 118.4, 117.8, 79.1, 35.7, 23.2; **HRMS** (ESI) Calcd for C<sub>17</sub>H<sub>16</sub>NO<sub>3</sub> [M+H]<sup>+</sup> 282.1125; found 282.1123; [ $\alpha$ ]<sup>18</sup><sub>D</sub> = +5.3 (c = 0.2, CHCl<sub>3</sub>); HPLC analysis: ee = 49%; CHIRALPAK®IG (80% hexanes: 20% isopropanol, 1 mL/min) *t*<sub>minor</sub> = 21.1 min, *t*<sub>major</sub> = 22.2 min.

**(S)-N-(4-Formyl-3-((trimethylsilyl)methyl)-2,3-dihydrobenzofuran-5-yl)benzamide**

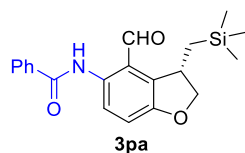

By following a modified procedure at 70 °C for 24 h, the reaction of **1p** (36.8 mg, 0.15 mmol) with **2a** (62.1 mg, 0.375 mmol), [Cp\*RhCl<sub>2</sub>]<sub>2</sub> (4.9 mg, 0.0075 mmol), KH<sub>2</sub>PO<sub>4</sub> (31.1 mg, 0.225 mmol), AgSbF<sub>6</sub> (12.6 mg, 0.03 mmol), (R)-(+)-1-(1-naphthyl)ethylamine (12.0 μL, 0.075 mmol), and *N*-Phthaloyl-L-Phenylalanine (13.5 mg, 0.045 mmol) afforded **3pa** (21.2 mg, 40% yield). Yellow solid; **<sup>1</sup>H NMR** (400 MHz, CDCl<sub>3</sub>) δ 11.91 (s, 1H), 10.22 (s, 1H), 8.77 (d, *J* = 9.0 Hz, 1H), 8.05 (dd, *J* = 8.1, 1.7 Hz, 2H), 7.60–7.50 (m, 3H), 7.11 (d, *J* = 9.0 Hz, 1H), 4.59 (t, *J* = 8.2 Hz, 1H), 4.35 (dd, *J* = 8.7, 2.5 Hz, 1H), 4.01–3.93 (m, 1H), 1.26–1.19 (m, 1H), 0.93–0.87 (m, 1H), 0.07 (s, 9H); **<sup>13</sup>C NMR** (101 MHz, CDCl<sub>3</sub>) δ 193.0, 165.8, 155.2, 138.9, 135.2, 134.9, 132.1, 129.0 (2C), 127.5 (2C), 120.6, 117.9, 117.7, 78.3, 37.3, 27.0, -0.9 (3C); **HRMS** (ESI) Calcd for C<sub>20</sub>H<sub>24</sub>NO<sub>3</sub>Si [M+H]<sup>+</sup> 354.1520; found 354.1522; [α]<sup>18</sup><sub>D</sub> = +8.4 (c = 0.2, CHCl<sub>3</sub>); HPLC analysis: ee = 70%; CHIRALPAK®AD-H (90% hexanes: 10% isopropanol, 1 mL/min) *t*<sub>minor</sub> = 8.4 min, *t*<sub>major</sub> = 9.9 min.

**(S)-N-(3-((Benzyloxy)methyl)-4-formyl-3-methyl-2,3-dihydrobenzofuran-5-yl)benzamide**

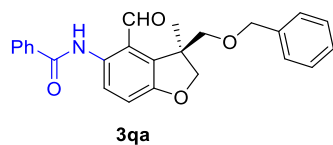

By following a modified procedure at 50 °C for 36 h, the reaction of **1q** (43.5 mg, 0.15 mmol) with **2a** (61.7 mg, 0.375 mmol), [Cp\*RhCl<sub>2</sub>]<sub>2</sub> (5.2 mg, 0.0075 mmol), AgSbF<sub>6</sub> (11.9 mg, 0.03 mmol), (R)-(+)-1-(1-naphthyl)ethylamine (12.0 μL, 0.075 mmol), and MesCO<sub>2</sub>H (12.6 mg, 0.075 mmol) afforded **3qa** (38.7 mg, 64% yield). Yellow solid; **<sup>1</sup>H NMR** (400 MHz, CDCl<sub>3</sub>) δ 12.14 (s, 1H), 10.42 (s, 1H), 8.82 (d, *J* = 9.1 Hz, 1H), 8.06 (dd, *J* = 8.0, 1.7 Hz, 2H), 7.58–7.52 (m, 3H), 7.35–7.27 (m, 3H), 7.25–7.20 (m, 2H), 7.12 (d, *J* = 9.0 Hz, 1H), 4.55 (d, *J* = 12.2 Hz, 1H), 4.51–4.46 (m, 2H), 4.19 (d, *J* = 8.8 Hz, 1H), 3.60 (s, 2H), 1.61 (s, 3H); **<sup>13</sup>C NMR** (101 MHz, CDCl<sub>3</sub>) δ 194.5, 166.0, 156.4, 137.5, 135.8, 135.4, 135.0, 132.0, 129.0 (2C), 128.6 (2C), 128.1, 127.8 (2C), 127.6 (2C), 121.7, 120.5, 117.9, 81.2, 76.0, 73.7, 48.9, 24.3; **HRMS** (ESI) Calcd for C<sub>25</sub>H<sub>23</sub>NO<sub>4</sub> [M+H]<sup>+</sup> 402.1700; found 402.1701; [α]<sup>18</sup><sub>D</sub> = +21.4 (c = 0.2, CHCl<sub>3</sub>); HPLC analysis: ee = 86%; CHIRALPAK®IG (80% hexanes: 20% isopropanol, 1 mL/min) *t*<sub>major</sub> = 14.7 min, *t*<sub>minor</sub> = 15.4 min.

**(S)-N-(3-(((1,1'-Biphenyl)-4-ylmethoxy)methyl)-4-formyl-3-methyl-2,3-dihydrobenzofuran-5-yl)benzamide**

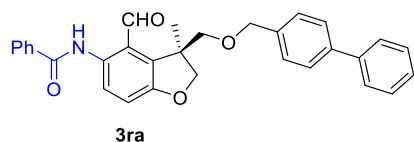

By following a modified procedure at 50 °C for 36 h, the reaction of **1r** (54.2 mg, 0.15 mmol) with **2a** (61.2 mg, 0.375 mmol), [Cp\*RhCl<sub>2</sub>]<sub>2</sub> (5.0 mg, 0.0075 mmol), AgSbF<sub>6</sub> (10.4 mg, 0.03 mmol), (R)-(+)-1-(1-naphthyl)ethylamine (12.0 μL, 0.075 mmol), and MesCO<sub>2</sub>H (12.4 mg, 0.075 mmol) afforded **3ra** (30.9 mg, 43% yield). Yellow solid; **<sup>1</sup>H NMR** (400 MHz, CDCl<sub>3</sub>) δ 12.14 (s, 1H), 10.44 (s, 1H), 8.84 (d, *J* = 9.0 Hz, 1H), 8.07–8.02 (m, 2H), 7.59–7.49 (m, 7H), 7.45–7.39 (m, 2H), 7.36–7.31 (m, 1H), 7.28 (d, *J* = 7.9 Hz, 2H), 7.13 (d, *J* = 9.1 Hz, 1H), 4.59 (d, *J* = 12.2 Hz, 1H), 4.52 (dd, *J* = 10.7, 1.8 Hz, 2H), 4.20 (d, *J* = 8.8 Hz, 1H), 3.64 (s, 2H), 1.62 (s, 3H); **<sup>13</sup>C NMR** (101 MHz, CDCl<sub>3</sub>) δ 194.4, 165.9, 156.4, 140.9, 140.8, 136.5, 135.7, 135.4, 134.9, 132.0, 128.92 (2C), 128.88 (2C), 128.3 (2C), 127.51 (2C), 127.47, 127.3 (2C), 127.2 (2C), 121.7, 120.5, 117.9, 81.1, 76.0, 73.4, 48.9, 24.3; **HRMS** (ESI) Calcd for C<sub>31</sub>H<sub>28</sub>NO<sub>4</sub> [M+H]<sup>+</sup> 478.2013; found 478.2016; [α]<sup>18</sup><sub>D</sub> = +37.5 (c = 0.4, CHCl<sub>3</sub>); HPLC analysis: ee = 90%; CHIRALPAK®IG (70% hexanes: 30% isopropanol, 1 mL/min) *t*<sub>major</sub> = 14.3 min, *t*<sub>minor</sub> = 16.4 min.

**(S)-N-(3-(((4-Bromobenzyl)oxy)methyl)-4-formyl-3-methyl-2,3-dihydrobenzofuran-5-yl)benzamide**

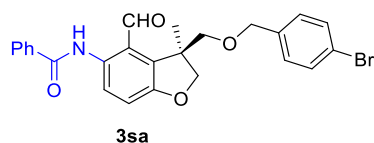

By following a modified procedure at 50 °C for 36 h, the reaction of **1s** (53.6 mg, 0.15 mmol) with **2a** (61.1 mg, 0.375 mmol), [Cp\*RhCl<sub>2</sub>]<sub>2</sub> (5.1 mg, 0.0075 mmol), AgSbF<sub>6</sub> (11.1 mg, 0.03 mmol), (R)-(+)-1-(1-naphthyl)ethylamine (12.0 μL, 0.075 mmol), and MesCO<sub>2</sub>H (12.6 mg, 0.075 mmol) afforded **3sa** (36.5 mg, 51% yield). Yellow solid; **<sup>1</sup>H NMR** (400 MHz, CDCl<sub>3</sub>) δ 12.13 (s, 1H), 10.41 (s, 1H), 8.83 (d, *J* = 9.0 Hz, 1H), 8.08–8.03 (m, 2H), 7.58–7.50 (m, 3H), 7.45 (d, *J* = 8.4 Hz, 2H), 7.12 (d, *J* = 9.1 Hz, 1H), 7.11–7.07 (m, 2H), 4.49–4.40 (m, 3H), 4.19 (d, *J* = 8.9 Hz, 1H), 3.59 (s, 2H), 1.61 (s, 3H); **<sup>13</sup>C NMR** (101 MHz, CDCl<sub>3</sub>) δ 194.3, 165.9, 156.4, 136.5, 135.5, 135.4, 134.9, 132.0, 131.7 (2C), 129.4 (2C), 128.9 (2C), 127.5 (2C), 121.9, 121.7, 120.5, 117.9, 81.0, 76.2, 72.9, 48.8, 24.2; **HRMS** (ESI) Calcd for C<sub>25</sub>H<sub>23</sub>BrNO<sub>4</sub> [M+H]<sup>+</sup> 480.0805; found 480.0809; [α]<sup>18</sup><sub>D</sub> = +20.8 (c = 0.2, CHCl<sub>3</sub>); HPLC analysis: ee = 87%; CHIRALPAK®IG (80% hexanes: 20% isopropanol, 1 mL/min) *t*<sub>major</sub> = 13.1 min, *t*<sub>minor</sub> = 13.8 min.

**(S)-N-(4-Formyl-3-methyl-3-((naphthalen-2-ylmethoxy)methyl)-2,3-dihydrobenzofuran-5-yl)benzamide**

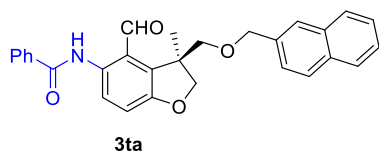

By following a modified procedure at 50 °C for 36 h, the reaction of **1t** (49.2 mg, 0.15 mmol) with **2a** (61.3 mg, 0.375 mmol), [Cp\**Rh*Cl<sub>2</sub>]<sub>2</sub> (5.3 mg, 0.0075 mmol), AgSbF<sub>6</sub> (11.4 mg, 0.03 mmol), (R)-(+)-1-(1-naphthyl)ethylamine (12.0 μL, 0.075 mmol), and MesCO<sub>2</sub>H (12.6 mg, 0.075 mmol) afforded **3ta** (31.4 mg, 46% yield). Yellow solid; **<sup>1</sup>H NMR** (400 MHz, CDCl<sub>3</sub>) δ 12.12 (s, 1H), 10.42 (s, 1H), 8.83 (d, *J* = 9.0 Hz, 1H), 8.07–8.01 (m, 2H), 7.82–7.74 (m, 3H), 7.63 (s, 1H), 7.60–7.50 (m, 3H), 7.48–7.42 (m, 2H), 7.32 (dd, *J* = 8.4, 1.7 Hz, 1H), 7.12 (d, *J* = 9.0 Hz, 1H), 4.70 (d, *J* = 12.3 Hz, 1H), 4.63 (d, *J* = 12.3 Hz, 1H), 4.50 (d, *J* = 8.8 Hz, 1H), 4.19 (d, *J* = 8.8 Hz, 1H), 3.63 (s, 2H), 1.61 (s, 3H); **<sup>13</sup>C NMR** (101 MHz, CDCl<sub>3</sub>) δ 194.4, 165.9, 156.4, 135.7, 135.4, 134.9 (2C), 133.2, 133.1, 132.0, 128.9 (2C), 128.5, 127.9, 127.8, 127.5 (2C), 126.8, 126.4, 126.2, 125.6, 121.7, 120.5, 117.8, 81.1, 76.0, 73.7, 48.9, 24.3; **HRMS** (ESI) Calcd for C<sub>29</sub>H<sub>26</sub>NO<sub>4</sub> [M+H]<sup>+</sup> 452.1856; found 452.1859; [α]<sup>18</sup><sub>D</sub> = +19.8 (c = 0.2, CHCl<sub>3</sub>); HPLC analysis: ee = 88%; CHIRALPAK®IG (70% hexanes: 30% isopropanol, 1 mL/min) *t*<sub>major</sub> = 13.9 min, *t*<sub>minor</sub> = 15.2 min.

**(S)-N-(4-Formyl-3-methyl-3-((thiophen-2-ylmethoxy)methyl)-2,3-dihydrobenzofuran-5-yl)benzamide**

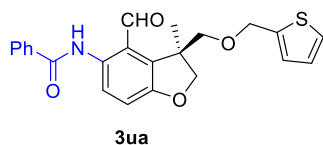

By following a modified procedure at 50 °C for 36 h, the reaction of **1u** (43.2 mg, 0.15 mmol) with **2a** (61.3 mg, 0.375 mmol), [Cp\**Rh*Cl<sub>2</sub>]<sub>2</sub> (4.7 mg, 0.0075 mmol), AgSbF<sub>6</sub> (10.8 mg, 0.03 mmol), (R)-(+)-1-(1-naphthyl)ethylamine (12.0 μL, 0.075 mmol), and MesCO<sub>2</sub>H (12.1 mg, 0.075 mmol) afforded **3ua** (34.0 mg, 56% yield). Yellow solid; **<sup>1</sup>H NMR** (400 MHz, CDCl<sub>3</sub>) δ 12.16 (s, 1H), 10.42 (s, 1H), 8.82 (d, *J* = 9.0 Hz, 1H), 8.08–8.02 (m, 2H), 7.59–7.50 (m, 3H), 7.28 (dd, *J* = 4.9, 1.4 Hz, 1H), 7.11 (d, *J* = 9.0 Hz, 1H), 6.97–6.91 (m, 2H), 4.70 (d, *J* = 12.8 Hz, 1H), 4.65 (d, *J* = 12.8 Hz, 1H), 4.47 (d, *J* = 8.9 Hz, 1H), 4.17 (d, *J* = 8.9 Hz, 1H), 3.61 (s, 2H), 1.59 (s, 3H); **<sup>13</sup>C NMR** (101 MHz, CDCl<sub>3</sub>) δ 194.5, 165.9, 156.4, 140.3, 135.7, 135.5, 135.0, 132.0, 128.9 (2C), 127.6 (2C), 126.8 (2C), 126.4, 121.7, 120.5, 117.9, 81.1, 75.5, 68.0, 48.8, 24.2; **HRMS** (ESI) Calcd for C<sub>23</sub>H<sub>22</sub>NO<sub>4</sub>S [M+H]<sup>+</sup> 408.1264; found 408.1266; [α]<sup>18</sup><sub>D</sub> = +16.2 (c = 0.2, CHCl<sub>3</sub>); HPLC analysis: ee = 87%; CHIRALPAK®IG (70% hexanes: 30% isopropanol, 1 mL/min) *t*<sub>major</sub> = 12.6 min, *t*<sub>minor</sub> = 13.5 min.

**(S)-N-(3-((Cyclobutylmethoxy)methyl)-4-formyl-3-methyl-2,3-dihydrobenzofuran-5-yl)benzamide**

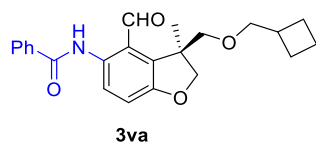

By following a modified procedure at 50 °C for 36 h, the reaction of **1v** (39.2 mg, 0.15 mmol) with **2a** (61.3 mg, 0.375 mmol), [Cp\**Rh*Cl<sub>2</sub>]<sub>2</sub> (4.7 mg, 0.0075 mmol), AgSbF<sub>6</sub> (11.3 mg, 0.03 mmol), (R)-(+)-1-(1-naphthyl)ethylamine (12.0 μL, 0.075 mmol), and MesCO<sub>2</sub>H (12.5 mg, 0.075 mmol) afforded **3va** (31.2 mg, 55% yield). Yellow solid; <sup>1</sup>H NMR (400 MHz, CDCl<sub>3</sub>) δ 12.21 (s, 1H), 10.47 (s, 1H), 8.82 (d, *J* = 9.0 Hz, 1H), 8.06 (dd, *J* = 7.9, 1.7 Hz, 2H), 7.59–7.48 (m, 3H), 7.11 (d, *J* = 9.0 Hz, 1H), 4.42 (d, *J* = 8.9 Hz, 1H), 4.18 (d, *J* = 8.9 Hz, 1H), 3.60–3.49 (m, 2H), 3.44–3.32 (m, 2H), 2.59–2.46 (m, 1H), 2.05–1.93 (m, 2H), 1.93–1.76 (m, 2H), 1.73–1.63 (m, 2H), 1.61 (s, 3H); <sup>13</sup>C NMR (101 MHz, CDCl<sub>3</sub>) δ 195.3, 165.9, 156.3, 136.1, 135.4, 135.0, 131.9, 128.9 (2C), 127.5 (2C), 121.5, 120.7, 117.6, 81.1, 76.8, 76.2, 49.0, 35.0, 25.1, 25.0, 24.1, 18.7; HRMS (ESI) Calcd for C<sub>23</sub>H<sub>26</sub>NO<sub>4</sub> [M+H]<sup>+</sup> 380.1856; found 380.1857; [α]<sup>18</sup><sub>D</sub> = +17.7 (c = 0.2, CHCl<sub>3</sub>); HPLC analysis: ee = 83%; CHIRALPAK®IG (70% hexanes: 30% isopropanol, 1 mL/min) *t*<sub>major</sub> = 9.8 min, *t*<sub>minor</sub> = 10.7 min.

**(S)-N-(3-Benzyl-7-fluoro-4-formyl-2,3-dihydrobenzofuran-5-yl)benzamide**

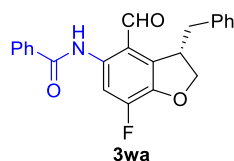

By following the general procedure, the reaction of **1w** (37.6 mg, 0.15 mmol) with **2a** (62.1 mg, 0.375 mmol), [Cp\**Rh*Cl<sub>2</sub>]<sub>2</sub> (4.9 mg, 0.0075 mmol), KH<sub>2</sub>PO<sub>4</sub> (30.9 mg, 0.225 mmol), AgSbF<sub>6</sub> (11.9 mg, 0.03 mmol), (R)-(+)-1-(1-naphthyl)ethylamine (12.0 μL, 0.075 mmol), and *N*-Phthaloyl-L-Phenylalanine (13.7 mg, 0.045 mmol) afforded **3wa** (39.8 mg, 71% yield). Yellow solid; <sup>1</sup>H NMR (400 MHz, CDCl<sub>3</sub>) δ 12.09 (s, 1H), 9.51 (s, 1H), 8.77 (d, *J* = 13.3 Hz, 1H), 8.02 (d, *J* = 6.8 Hz, 2H), 7.60–7.49 (m, 3H), 7.36–7.28 (m, 3H), 7.10–7.05 (m, 2H), 4.65 (dd, *J* = 9.0, 1.9 Hz, 1H), 4.60 (dd, *J* = 9.1, 7.1 Hz, 1H), 4.00 (q, *J* = 7.6 Hz, 1H), 3.02 (dd, *J* = 13.7, 8.0 Hz, 1H), 2.94 (dd, *J* = 13.7, 7.5 Hz, 1H); <sup>13</sup>C NMR (101 MHz, CDCl<sub>3</sub>) δ 191.1, 165.9, 151.9 (d, *J* = 257.2 Hz), 142.5 (d, *J* = 12.0 Hz), 138.8 (d, *J* = 6.4 Hz), 137.5, 136.8 (d, *J* = 10.4 Hz), 134.3, 132.3, 129.4 (2C), 129.1 (2C), 129.0 (2C), 127.54 (2C), 127.45, 115.2 (d, *J* = 3.0 Hz), 108.7 (d, *J* = 24.2 Hz), 78.1, 43.7 (d, *J* = 1.9 Hz), 42.4; HRMS (ESI) Calcd for C<sub>23</sub>H<sub>19</sub>FNO<sub>3</sub> [M+H]<sup>+</sup> 376.1343; found 376.1344; [α]<sup>18</sup><sub>D</sub> = -22.1 (c = 0.4, CHCl<sub>3</sub>); HPLC analysis: ee = 91%; CHIRALPAK®IG (50% hexanes: 50% isopropanol, 1 mL/min) *t*<sub>minor</sub> = 13.5 min, *t*<sub>major</sub> = 17.6 min.

**(S)-N-(3-Benzyl-7-chloro-4-formyl-2,3-dihydrobenzofuran-5-yl)benzamide**

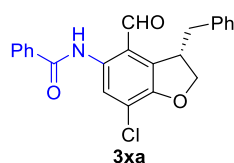

By following the general procedure, the reaction of **1x** (41.1 mg, 0.15 mmol) with **2a** (61.4 mg, 0.375 mmol), [Cp\**Rh*Cl<sub>2</sub>]<sub>2</sub> (4.7 mg, 0.0075 mmol), KH<sub>2</sub>PO<sub>4</sub> (31.0 mg, 0.225 mmol), AgSbF<sub>6</sub> (13.5 mg, 0.03 mmol), (R)-(+)-1-(1-naphthyl)ethylamine (12.0 μL, 0.075 mmol), and *N*-Phthaloyl-L-Phenylalanine (13.5 mg, 0.045 mmol) afforded **3xa** (35.6 mg, 61% yield). Yellow solid; **<sup>1</sup>H NMR** (400 MHz, CDCl<sub>3</sub>) δ 11.93 (s, 1H), 9.50 (s, 1H), 8.99 (s, 1H), 8.04–7.98 (m, 2H), 7.60–7.49 (m, 3H), 7.36–7.29 (m, 3H), 7.10–7.05 (m, 2H), 4.66 (dd, *J* = 9.1, 2.1 Hz, 1H), 4.61 (dd, *J* = 9.0, 7.0 Hz, 1H), 4.07–3.99 (m, 1H), 3.03 (dd, *J* = 13.7, 8.0 Hz, 1H), 2.94 (dd, *J* = 13.7, 7.6 Hz, 1H); **<sup>13</sup>C NMR** (101 MHz, CDCl<sub>3</sub>) δ 191.5, 165.9, 151.7, 137.5, 136.0, 135.5, 134.4, 132.3, 129.5 (2C), 129.2 (2C), 129.0 (2C), 127.54 (2C), 127.50, 124.1, 121.0, 117.5, 77.6, 44.0, 42.5; **HRMS** (ESI) Calcd for C<sub>23</sub>H<sub>19</sub>ClNO<sub>3</sub> [M+H]<sup>+</sup> 392.1048; found 392.1050; [α]<sup>18</sup><sub>D</sub> = -20.8 (c = 0.2, CHCl<sub>3</sub>); HPLC analysis: ee = 85%; CHIRALPAK®IG (90% hexanes: 10% isopropanol, 1 mL/min) *t*<sub>major</sub> = 26.4 min, *t*<sub>minor</sub> = 33.1 min.

**(S)-N-(3-Benzyl-4-formyl-6-methoxy-2,3-dihydrobenzofuran-5-yl)benzamide**

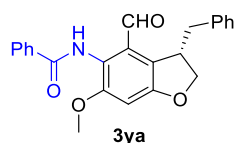

By following the general procedure, the reaction of **1y** (40.5 mg, 0.15 mmol) with **2a** (61.4 mg, 0.375 mmol), [Cp\**Rh*Cl<sub>2</sub>]<sub>2</sub> (4.9 mg, 0.0075 mmol), KH<sub>2</sub>PO<sub>4</sub> (31.2 mg, 0.225 mmol), AgSbF<sub>6</sub> (13.9 mg, 0.03 mmol), (R)-(+)-1-(1-naphthyl)ethylamine (12.0 μL, 0.075 mmol), and *N*-Phthaloyl-L-Phenylalanine (13.0 mg, 0.045 mmol) afforded **3ya** (25.0 mg, 43% yield). Yellow solid; **<sup>1</sup>H NMR** (400 MHz, CDCl<sub>3</sub>) δ 10.09 (s, 1H), 8.08 (s, 1H), 7.97 (d, *J* = 7.5 Hz, 2H), 7.66–7.47 (m, 3H), 7.36–7.19 (m, 5H), 6.70 (s, 1H), 4.50 (d, *J* = 8.9 Hz, 1H), 4.35 (t, *J* = 8.5 Hz, 1H), 4.16–4.06 (m, 1H), 3.87 (s, 3H), 3.15 (dd, *J* = 13.2, 3.5 Hz, 1H), 2.63–2.51 (m, 1H); **<sup>13</sup>C NMR** (101 MHz, CDCl<sub>3</sub>) δ 190.1, 167.7, 159.4, 153.4, 139.8, 133.9, 132.4, 129.5 (2C), 129.0 (2C), 128.6 (2C), 127.6 (2C), 127.0, 126.4, 123.0, 121.0, 98.9, 76.8, 56.5, 43.9, 40.1; **HRMS** (ESI) Calcd for C<sub>24</sub>H<sub>22</sub>NO<sub>4</sub> [M+H]<sup>+</sup> 388.1543; found 388.1542; [α]<sup>18</sup><sub>D</sub> = -18.2 (c = 0.2, CHCl<sub>3</sub>); HPLC analysis: ee = 82%; CHIRALPAK®IG (50% hexanes: 50% isopropanol, 1 mL/min) *t*<sub>major</sub> = 9.6 min, *t*<sub>minor</sub> = 13.0 min.

**(S)-N-(3-Benzyl-6-fluoro-4-formyl-2,3-dihydrobenzofuran-5-yl)benzamide**

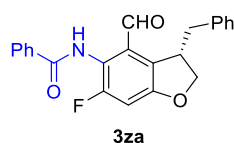

By following the general procedure, the reaction of **1z** (39.3 mg, 0.15 mmol) with **2a** (61.5 mg, 0.375 mmol), [Cp\*RhCl<sub>2</sub>]<sub>2</sub> (4.9 mg, 0.0075 mmol), KH<sub>2</sub>PO<sub>4</sub> (30.5 mg, 0.225 mmol), AgSbF<sub>6</sub> (13.4 mg, 0.03 mmol), (R)-(+)-1-(1-naphthyl)ethylamine (12.0 μL, 0.075 mmol), and *N*-Phthaloyl-L-Phenylalanine (12.9 mg, 0.045 mmol) afforded **3za** (37.1 mg, 66% yield). Yellow solid; <sup>1</sup>H NMR (400 MHz, CDCl<sub>3</sub>) δ 9.89 (s, 1H), 8.62 (s, 1H), 7.96 (d, *J* = 7.7 Hz, 2H), 7.58 (t, *J* = 7.3 Hz, 1H), 7.50 (t, *J* = 7.6 Hz, 2H), 7.32 (t, *J* = 7.3 Hz, 2H), 7.28–7.24 (m, 1H), 7.21 (d, *J* = 7.3 Hz, 2H), 6.88 (d, *J* = 9.8 Hz, 1H), 4.55 (dd, *J* = 9.0, 2.0 Hz, 1H), 4.44 (t, *J* = 8.3 Hz, 1H), 4.11–4.01 (m, 1H), 3.02 (dd, *J* = 13.5, 5.0 Hz, 1H), 2.71 (dd, *J* = 13.5, 9.5 Hz, 1H); <sup>13</sup>C NMR (101 MHz, CDCl<sub>3</sub>) δ 189.7 (d, *J* = 3.2 Hz), 166.9, 159.3 (d, *J* = 12.4 Hz), 156.9 (d, *J* = 249.1 Hz), 138.7, 133.4, 132.6, 129.4 (2C), 128.98 (2C), 128.95 (d, *J* = 2.5 Hz), 128.9 (2C), 127.7 (2C), 126.9, 126.8 (d, *J* = 2.2 Hz), 119.2 (d, *J* = 14.5 Hz), 104.0 (d, *J* = 25.6 Hz), 77.4, 43.2, 40.9; HRMS (ESI) Calcd for C<sub>23</sub>H<sub>19</sub>FNO<sub>3</sub> [M+H]<sup>+</sup> 376.1343; found 376.1342; [α]<sup>18</sup><sub>D</sub> = -20.2 (c = 0.2, CHCl<sub>3</sub>); HPLC analysis: ee = 81%; CHIRALPAK®IG (80% hexanes: 20% isopropanol, 1 mL/min) *t*<sub>minor</sub> = 19.5 min, *t*<sub>major</sub> = 21.1 min.

**(S)-N-(3-Benzyl-6,7-difluoro-4-formyl-2,3-dihydrobenzofuran-5-yl)benzamide**

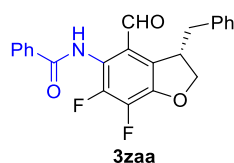

By following the general procedure, the reaction of **1za** (41.9 mg, 0.15 mmol) with **2a** (61.8 mg, 0.375 mmol), [Cp\*RhCl<sub>2</sub>]<sub>2</sub> (4.8 mg, 0.0075 mmol), KH<sub>2</sub>PO<sub>4</sub> (30.8 mg, 0.225 mmol), AgSbF<sub>6</sub> (13.7 mg, 0.03 mmol), (R)-(+)-1-(1-naphthyl)ethylamine (12.0 μL, 0.075 mmol), and *N*-Phthaloyl-L-Phenylalanine (13.2 mg, 0.045 mmol) afforded **3zaa** (29.7 mg, 50% yield). Yellow solid; <sup>1</sup>H NMR (400 MHz, CDCl<sub>3</sub>) δ 9.77 (s, 1H), 8.93 (s, 1H), 7.97 (d, *J* = 7.2 Hz, 2H), 7.60 (t, *J* = 7.4 Hz, 1H), 7.51 (t, *J* = 7.6 Hz, 2H), 7.32 (d, *J* = 7.6 Hz, 2H), 7.30–7.25 (m, 1H), 7.19 (d, *J* = 6.8 Hz, 2H), 4.66 (dd, *J* = 9.1, 2.0 Hz, 1H), 4.55 (dd, *J* = 9.1, 7.5 Hz, 1H), 4.15–4.06 (m, 1H), 3.02 (dd, *J* = 13.5, 5.4 Hz, 1H), 2.77 (dd, *J* = 13.5, 9.3 Hz, 1H); <sup>13</sup>C NMR (101 MHz, CDCl<sub>3</sub>) δ 188.9 (d, *J* = 2.8 Hz), 166.6, 146.4 (d, *J* = 8.1 Hz), 145.8 (dd, *J* = 252.5, 11.3 Hz), 140.7 (dd, *J* = 260.5, 15.6 Hz), 138.2, 133.1, 132.8, 131.4 (d, *J* = 3.1 Hz), 129.4 (2C), 129.1 (2C), 129.0 (2C), 127.8 (2C), 127.2, 121.42 (d, *J* = 7.0 Hz), 121.35, 78.7, 43.8, 40.9; HRMS (ESI) Calcd for C<sub>23</sub>H<sub>18</sub>F<sub>2</sub>NO<sub>3</sub> [M+H]<sup>+</sup> 394.1249; found 394.1250; [α]<sup>18</sup><sub>D</sub> = -38.4 (c = 0.2, CHCl<sub>3</sub>); HPLC analysis: ee = 88%; CHIRALPAK®IG (70% hexanes: 30% isopropanol, 1 mL/min) *t*<sub>minor</sub> = 8.2 min, *t*<sub>major</sub> = 9.0 min.

**(S)-N-(3-Benzyl-4-formyl-2,3-dihydrobenzofuran-5-yl)-4-methoxybenzamide**

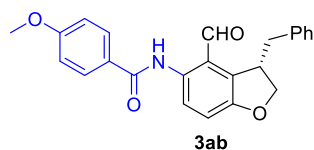

By following the general procedure, the reaction of **1a** (35.3 mg, 0.15 mmol) with **2b** (72.6 mg, 0.375 mmol), [Cp\*RhCl<sub>2</sub>]<sub>2</sub> (4.8 mg, 0.0075 mmol), KH<sub>2</sub>PO<sub>4</sub> (31.0 mg, 0.225 mmol), AgSbF<sub>6</sub> (11.8 mg, 0.03 mmol), (R)-(+)-1-(1-naphthyl)ethylamine (12.0 μL, 0.075 mmol), and *N*-Phthaloyl-L-Phenylalanine (13.4 mg, 0.045 mmol) afforded **3ab** (43.3 mg, 74% yield). Yellow solid; <sup>1</sup>H NMR (400 MHz, CDCl<sub>3</sub>) δ 11.82 (s, 1H), 9.59 (s, 1H), 8.81 (d, *J* = 9.0 Hz, 1H), 8.03–7.97 (m, 2H), 7.35–7.28 (m, 3H), 7.15 (d, *J* = 9.0 Hz, 1H), 7.07 (dd, *J* = 7.5, 1.9 Hz, 2H), 7.03–6.98 (m, 2H), 4.58–4.48 (m, 2H), 4.00–3.93 (m, 1H), 3.88 (s, 3H), 2.99 (dd, *J* = 13.6, 8.0 Hz, 1H), 2.92 (dd, *J* = 13.6, 7.4 Hz, 1H); <sup>13</sup>C NMR (101 MHz, CDCl<sub>3</sub>) δ 192.4, 165.4, 162.7, 155.5, 138.0, 135.3, 134.9, 129.5 (2C), 129.4 (2C), 129.0 (2C), 127.3, 127.1, 120.9, 118.8, 117.8, 114.1 (2C), 76.9, 55.6, 43.0, 42.6; HRMS (ESI) Calcd for C<sub>24</sub>H<sub>22</sub>NO<sub>4</sub> [M+H]<sup>+</sup> 388.1543; found 388.1548; [α]<sup>18</sup><sub>D</sub> = -10.4 (c = 0.4, CHCl<sub>3</sub>); HPLC analysis: ee = 89%; CHIRALPAK®IC (70% hexanes: 30% isopropanol, 1 mL/min) *t*<sub>minor</sub> = 21.0 min, *t*<sub>major</sub> = 27.3 min.

**(S)-N-(3-Benzyl-4-formyl-2,3-dihydrobenzofuran-5-yl)-4-methylbenzamide**

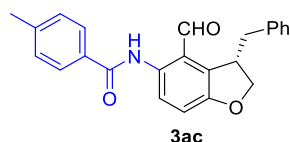

By following the general procedure, the reaction of **1a** (36.0 mg, 0.15 mmol) with **2c** (67.5 mg, 0.375 mmol), [Cp\*RhCl<sub>2</sub>]<sub>2</sub> (4.6 mg, 0.0075 mmol), KH<sub>2</sub>PO<sub>4</sub> (30.7 mg, 0.225 mmol), AgSbF<sub>6</sub> (12.1 mg, 0.03 mmol), (R)-(+)-1-(1-naphthyl)ethylamine (12.0 μL, 0.075 mmol), and *N*-Phthaloyl-L-Phenylalanine (13.2 mg, 0.045 mmol) afforded **3ac** (43.2 mg, 78% yield). Yellow solid; <sup>1</sup>H NMR (400 MHz, CDCl<sub>3</sub>) δ 11.83 (s, 1H), 9.58 (s, 1H), 8.81 (d, *J* = 9.0 Hz, 1H), 7.92 (d, *J* = 8.2 Hz, 2H), 7.34–7.26 (m, 5H), 7.14 (d, *J* = 9.0 Hz, 1H), 7.09–7.03 (m, 2H), 4.56–4.46 (m, 2H), 4.00–3.91 (m, 1H), 2.98 (dd, *J* = 13.6, 8.1 Hz, 1H), 2.90 (dd, *J* = 13.6, 7.5 Hz, 1H), 2.42 (s, 3H); <sup>13</sup>C NMR (101 MHz, CDCl<sub>3</sub>) δ 192.3, 165.8, 155.5, 142.5, 137.9, 135.0, 134.9, 131.9, 129.6 (2C), 129.4 (2C), 129.0 (2C), 127.5 (2C), 127.2, 120.9, 118.8, 117.7, 76.9, 43.0, 42.6, 21.6; HRMS (ESI) Calcd for C<sub>24</sub>H<sub>22</sub>NO<sub>3</sub> [M+H]<sup>+</sup> 372.1594; found 372.1575; [α]<sup>18</sup><sub>D</sub> = +17.3 (c = 0.4, CHCl<sub>3</sub>); HPLC analysis: ee = 94%; CHIRALPAK®IC (70% hexanes: 30% isopropanol, 1 mL/min) *t*<sub>minor</sub> = 17.3 min, *t*<sub>major</sub> = 22.5 min.

**(S)-N-(3-Benzyl-4-formyl-2,3-dihydrobenzofuran-5-yl)-4-fluorobenzamide**

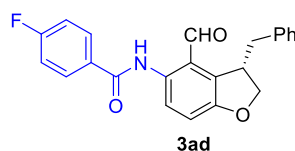

By following the general procedure, the reaction of **1a** (36.0 mg, 0.15 mmol) with **2d** (68.9 mg, 0.375 mmol), [Cp\*RhCl<sub>2</sub>]<sub>2</sub> (4.5 mg, 0.0075 mmol), KH<sub>2</sub>PO<sub>4</sub> (31.5 mg, 0.225 mmol), AgSbF<sub>6</sub> (11.7 mg, 0.03 mmol), (R)-(+)-1-(1-naphthyl)ethylamine (12.0 μL, 0.075 mmol), and *N*-Phthaloyl-L-Phenylalanine (13.3 mg, 0.045 mmol) afforded **3ad**

(40.1 mg, 71% yield). Yellow solid;  $^1\text{H NMR}$  (400 MHz,  $\text{CDCl}_3$ )  $\delta$  11.85 (s, 1H), 9.56 (s, 1H), 8.78 (d,  $J = 9.0$  Hz, 1H), 8.03 (dd,  $J = 8.6, 5.3$  Hz, 2H), 7.35–7.27 (m, 3H), 7.22–7.13 (m, 3H), 7.09–7.04 (m, 2H), 4.58–4.48 (m, 2H), 4.01–3.92 (m, 1H), 3.00 (dd,  $J = 13.6, 7.9$  Hz, 1H), 2.91 (dd,  $J = 13.7, 7.6$  Hz, 1H);  $^{13}\text{C NMR}$  (101 MHz,  $\text{CDCl}_3$ )  $\delta$  192.5, 165.1 (d,  $J = 253.7$  Hz), 164.7, 155.8, 137.9, 135.0, 134.8, 131.0 (d,  $J = 3.1$  Hz), 129.9 (d,  $J = 9.0$  Hz, 2C), 129.5 (2C), 129.1 (2C), 127.3, 120.9, 118.9, 117.8, 116.0 (d,  $J = 22.0$  Hz, 2C), 77.0, 43.0, 42.6; **HRMS** (ESI) Calcd for  $\text{C}_{23}\text{H}_{19}\text{FNO}_3$   $[\text{M}+\text{H}]^+$  376.1343; found 376.1355;  $[\alpha]^{18}_{\text{D}} = -27.8$  ( $c = 0.4$ ,  $\text{CHCl}_3$ ); HPLC analysis: ee = 90%; CHIRALPAK®IC (70% hexanes: 30% isopropanol, 1 mL/min)  $t_{\text{minor}} = 10.9$  min,  $t_{\text{major}} = 12.6$  min.

**(S)-N-(3-Benzyl-4-formyl-2,3-dihydrobenzofuran-5-yl)-4-chlorobenzamide**

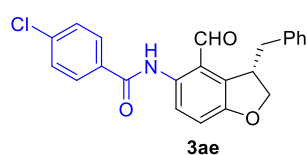

By following the general procedure, the reaction of **1a** (36.1 mg, 0.15 mmol) with **2e** (75.0 mg, 0.375 mmol),  $[\text{Cp}^*\text{RhCl}_2]_2$  (4.8 mg, 0.0075 mmol),  $\text{KH}_2\text{PO}_4$  (30.8 mg, 0.225 mmol),  $\text{AgSbF}_6$  (12.9 mg, 0.03 mmol), (R)-(+)-1-(1-naphthyl)ethylamine (12.0  $\mu\text{L}$ , 0.075 mmol), and *N*-Phthaloyl-L-Phenylalanine (13.2 mg, 0.045 mmol) afforded **3ae** (49.6 mg, 84% yield). Yellow solid;  $^1\text{H NMR}$  (400 MHz,  $\text{CDCl}_3$ )  $\delta$  11.88 (s, 1H), 9.55 (s, 1H), 8.79 (d,  $J = 9.0$  Hz, 1H), 7.96 (d,  $J = 8.6$  Hz, 2H), 7.48 (d,  $J = 8.5$  Hz, 2H), 7.35–7.28 (m, 3H), 7.16 (d,  $J = 9.0$  Hz, 1H), 7.10–7.04 (m, 2H), 4.59–4.49 (m, 2H), 4.01–3.92 (m, 1H), 3.01 (dd,  $J = 13.6, 7.9$  Hz, 1H), 2.91 (dd,  $J = 13.6, 7.6$  Hz, 1H);  $^{13}\text{C NMR}$  (101 MHz,  $\text{CDCl}_3$ )  $\delta$  192.5, 164.7, 155.9, 138.4, 137.8, 135.1, 134.7, 133.2, 129.5 (2C), 129.2 (2C), 129.1 (2C), 129.0 (2C), 127.3, 121.0, 119.0, 117.8, 77.0, 43.0, 42.7; **HRMS** (ESI) Calcd for  $\text{C}_{23}\text{H}_{19}\text{ClNO}_3$   $[\text{M}+\text{H}]^+$  392.1048; found 392.1045;  $[\alpha]^{18}_{\text{D}} = -40.3$  ( $c = 0.4$ ,  $\text{CHCl}_3$ ); HPLC analysis: ee = 90%; CHIRALPAK®IC (80% hexanes: 20% isopropanol, 1 mL/min)  $t_{\text{minor}} = 12.9$  min,  $t_{\text{major}} = 15.1$  min.

**(S)-Methyl-4-((3-benzyl-4-formyl-2,3-dihydrobenzofuran-5-yl)carbamoyl)benzoate**

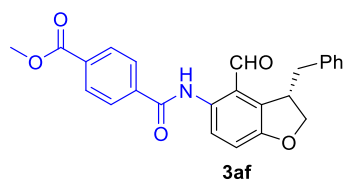

By following the general procedure, the reaction of **1a** (35.7 mg, 0.15 mmol) with **2f** (83.4 mg, 0.375 mmol),  $[\text{Cp}^*\text{RhCl}_2]_2$  (4.5 mg, 0.0075 mmol),  $\text{KH}_2\text{PO}_4$  (30.9 mg, 0.225 mmol),  $\text{AgSbF}_6$  (12.4 mg, 0.03 mmol), (R)-(+)-1-(1-naphthyl)ethylamine (12.0  $\mu\text{L}$ , 0.075 mmol), and *N*-Phthaloyl-L-Phenylalanine (13.9 mg, 0.045 mmol) afforded **3af** (26.7 mg, 43% yield). Yellow solid;  $^1\text{H NMR}$  (400 MHz,  $\text{CDCl}_3$ )  $\delta$  11.96 (s, 1H), 9.56

(s, 1H), 8.81 (d,  $J = 9.0$  Hz, 1H), 8.19–8.15 (m, 2H), 8.10–8.06 (m, 2H), 7.35–7.28 (m, 3H), 7.17 (d,  $J = 9.0$  Hz, 1H), 7.07 (dd,  $J = 7.4, 2.0$  Hz, 2H), 4.59–4.50 (m, 2H), 4.01–3.93 (m, 4H), 3.01 (dd,  $J = 13.6, 7.9$  Hz, 1H), 2.91 (dd,  $J = 13.6, 7.6$  Hz, 1H);  $^{13}\text{C}$  NMR (101 MHz,  $\text{CDCl}_3$ )  $\delta$  192.5, 166.4, 164.8, 156.0, 138.6, 137.8, 135.1, 134.5, 133.1, 130.2 (2C), 129.5 (2C), 129.1 (2C), 127.5 (2C), 127.3, 121.0, 119.0, 117.7, 77.0, 52.6, 43.0, 42.6; **HRMS** (ESI) Calcd for  $\text{C}_{25}\text{H}_{22}\text{NO}_5$   $[\text{M}+\text{H}]^+$  416.1492; found 416.1496;  $[\alpha]^{18}_{\text{D}} = +44.2$  ( $c = 0.2$ ,  $\text{CHCl}_3$ ); HPLC analysis: ee = 93%; CHIRALPAK®IC (50% hexanes: 50% isopropanol, 1 mL/min)  $t_{\text{minor}} = 17.2$  min,  $t_{\text{major}} = 22.0$  min.

**(S)-N-(3-Benzyl-4-formyl-2,3-dihydrobenzofuran-5-yl)-3-methoxybenzamide**

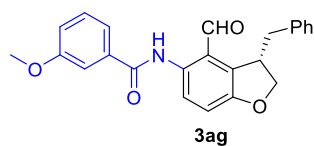

By following the general procedure, the reaction of **1a** (36.3 mg, 0.15 mmol) with **2g** (73.1 mg, 0.375 mmol),  $[\text{Cp}^*\text{RhCl}_2]_2$  (4.8 mg, 0.0075 mmol),  $\text{KH}_2\text{PO}_4$  (30.8 mg, 0.225 mmol),  $\text{AgSbF}_6$  (12.1 mg, 0.03 mmol), (R)-(+)-1-(1-naphthyl)ethylamine (12.0  $\mu\text{L}$ , 0.075 mmol), and *N*-Phthaloyl-L-Phenylalanine (13.4 mg, 0.045 mmol) afforded **3ag** (48.7 mg, 87% yield). Yellow solid;  $^1\text{H}$  NMR (400 MHz,  $\text{CDCl}_3$ )  $\delta$  11.87 (s, 1H), 9.59 (s, 1H), 8.80 (d,  $J = 9.0$  Hz, 1H), 7.60–7.56 (m, 2H), 7.41 (t,  $J = 8.1$  Hz, 1H), 7.34–7.26 (m, 3H), 7.15 (d,  $J = 9.0$  Hz, 1H), 7.11–7.04 (m, 3H), 4.57–4.48 (m, 2H), 4.00–3.92 (m, 1H), 3.89 (s, 3H), 2.98 (dd,  $J = 13.6, 8.0$  Hz, 1H), 2.91 (dd,  $J = 13.6, 7.4$  Hz, 1H);  $^{13}\text{C}$  NMR (101 MHz,  $\text{CDCl}_3$ )  $\delta$  192.3, 165.7, 160.1, 155.7, 137.9, 136.3, 135.0, 134.8, 129.9, 129.4 (2C), 129.0 (2C), 127.3, 120.9, 119.3, 118.9, 118.6, 117.7, 112.5, 76.9, 55.5, 43.0, 42.6; **HRMS** (ESI) Calcd for  $\text{C}_{24}\text{H}_{22}\text{NO}_4$   $[\text{M}+\text{H}]^+$  388.1543; found 388.1569;  $[\alpha]^{18}_{\text{D}} = -37.7$  ( $c = 0.4$ ,  $\text{CHCl}_3$ ); HPLC analysis: ee = 89%; CHIRALPAK®IC (70% hexanes: 30% isopropanol, 1 mL/min)  $t_{\text{minor}} = 19.3$  min,  $t_{\text{major}} = 26.2$  min.

**(S)-N-(3-Benzyl-4-formyl-2,3-dihydrobenzofuran-5-yl)-3-methylbenzamide**

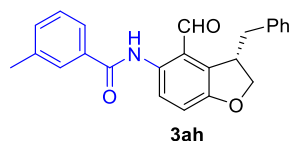

By following the general procedure, the reaction of **1a** (35.7 mg, 0.15 mmol) with **2h** (68.1 mg, 0.375 mmol),  $[\text{Cp}^*\text{RhCl}_2]_2$  (4.5 mg, 0.0075 mmol),  $\text{KH}_2\text{PO}_4$  (30.9 mg, 0.225 mmol),  $\text{AgSbF}_6$  (11.7 mg, 0.03 mmol), (R)-(+)-1-(1-naphthyl)ethylamine (12.0  $\mu\text{L}$ , 0.075 mmol), and *N*-Phthaloyl-L-Phenylalanine (13.2 mg, 0.045 mmol) afforded **3ah** (39.7 mg, 71% yield). Yellow solid;  $^1\text{H}$  NMR (400 MHz,  $\text{CDCl}_3$ )  $\delta$  11.83 (s, 1H), 9.61 (s, 1H), 8.81 (d,  $J = 9.0$  Hz, 1H), 7.84 (s, 1H), 7.80 (d,  $J = 7.5$  Hz, 1H), 7.43–7.27 (m, 5H), 7.15 (d,  $J = 9.1$  Hz, 1H), 7.10–7.04 (m, 2H), 4.58–4.47 (m, 2H), 4.01–3.92 (m, 1H), 3.04–2.87 (m, 2H), 2.45 (s, 3H);  $^{13}\text{C}$  NMR (101 MHz,  $\text{CDCl}_3$ )  $\delta$  192.3, 166.1, 155.7, 138.8, 137.9, 135.0, 134.9, 134.8, 132.8, 129.4 (2C), 129.0 (2C), 128.8, 128.4,

127.3, 124.4, 121.0, 118.9, 117.7, 76.9, 43.0, 42.6, 21.6; **HRMS** (ESI) Calcd for  $C_{24}H_{22}NO_3$   $[M+H]^+$  372.1594; found 372.1618;  $[\alpha]^{18}_D = -20.8$  ( $c = 0.4$ ,  $CHCl_3$ ); HPLC analysis: ee = 91%; CHIRALPAK®IC (80% hexanes: 20% isopropanol, 1 mL/min)  $t_{minor} = 19.1$  min,  $t_{major} = 23.6$  min.

**(S)-N-(3-Benzyl-4-formyl-2,3-dihydrobenzofuran-5-yl)-3-fluorobenzamide**

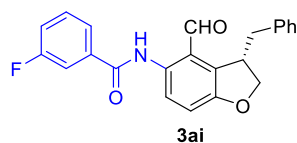

By following the general procedure, the reaction of **1a** (35.8 mg, 0.15 mmol) with **2i** (68.4 mg, 0.375 mmol),  $[Cp^*RhCl_2]_2$  (4.5 mg, 0.0075 mmol),  $KH_2PO_4$  (30.5 mg, 0.225 mmol),  $AgSbF_6$  (11.8 mg, 0.03 mmol), (R)-(+)-1-(1-naphthyl)ethylamine (12.0  $\mu$ L, 0.075 mmol), and *N*-Phthaloyl-L-Phenylalanine (13.2 mg, 0.045 mmol) afforded **3ai** (41.5 mg, 74% yield). Yellow solid; **<sup>1</sup>H NMR** (400 MHz,  $CDCl_3$ )  $\delta$  11.88 (s, 1H), 9.56 (s, 1H), 8.79 (d,  $J = 9.0$  Hz, 1H), 7.81–7.76 (m, 1H), 7.73 (dt,  $J = 9.5, 2.1$  Hz, 1H), 7.49 (td,  $J = 8.0, 5.6$  Hz, 1H), 7.35–7.21 (m, 4H), 7.16 (d,  $J = 8.9$  Hz, 1H), 7.09–7.04 (m, 2H), 4.59–4.49 (m, 2H), 4.01–3.93 (m, 1H), 3.00 (dd,  $J = 13.6, 7.9$  Hz, 1H), 2.91 (dd,  $J = 13.6, 7.6$  Hz, 1H); **<sup>13</sup>C NMR** (101 MHz,  $CDCl_3$ )  $\delta$  192.4, 164.4 (d,  $J = 2.7$  Hz), 163.1 (d,  $J = 247.8$  Hz), 155.9, 137.8, 137.1 (d,  $J = 6.8$  Hz), 135.1, 134.6, 130.6 (d,  $J = 7.8$  Hz), 129.5 (2C), 129.1 (2C), 127.4, 122.8 (d,  $J = 3.0$  Hz), 121.0, 119.1 (d,  $J = 21.4$  Hz), 119.0, 117.7, 115.0 (d,  $J = 23.1$  Hz), 77.0, 43.0, 42.7; **HRMS** (ESI) Calcd for  $C_{23}H_{19}FNO_3$   $[M+H]^+$  376.1343; found 376.1355;  $[\alpha]^{18}_D = -13.0$  ( $c = 0.4$ ,  $CHCl_3$ ); HPLC analysis: ee = 90%; CHIRALPAK®IC (80% hexanes: 20% isopropanol, 1 mL/min)  $t_{minor} = 12.8$  min,  $t_{major} = 16.6$  min.

**(S)-N-(3-Benzyl-4-formyl-2,3-dihydrobenzofuran-5-yl)-3-chlorobenzamide**

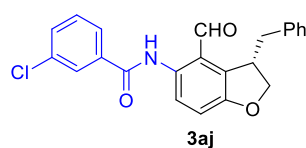

By following the general procedure, the reaction of **1a** (35.7 mg, 0.15 mmol) with **2j** (75.3 mg, 0.375 mmol),  $[Cp^*RhCl_2]_2$  (4.5 mg, 0.0075 mmol),  $KH_2PO_4$  (30.9 mg, 0.225 mmol),  $AgSbF_6$  (11.9 mg, 0.03 mmol), (R)-(+)-1-(1-naphthyl)ethylamine (12.0  $\mu$ L, 0.075 mmol), and *N*-Phthaloyl-L-Phenylalanine (13.5 mg, 0.045 mmol) afforded **3aj** (39.8 mg, 68% yield). Yellow solid; **<sup>1</sup>H NMR** (400 MHz,  $CDCl_3$ )  $\delta$  11.87 (s, 1H), 9.55 (s, 1H), 8.77 (d,  $J = 8.9$  Hz, 1H), 8.01 (t,  $J = 1.9$  Hz, 1H), 7.87 (dt,  $J = 7.6, 1.5$  Hz, 1H), 7.55–7.49 (m, 1H), 7.44 (t,  $J = 7.8$  Hz, 1H), 7.35–7.28 (m, 3H), 7.16 (d,  $J = 9.0$  Hz, 1H), 7.09–7.04 (m, 2H), 4.59–4.49 (m, 2H), 4.01–3.92 (m, 1H), 3.00 (dd,  $J = 13.6, 7.9$  Hz, 1H), 2.91 (dd,  $J = 13.6, 7.6$  Hz, 1H); **<sup>13</sup>C NMR** (101 MHz,  $CDCl_3$ )  $\delta$  192.4, 164.4, 155.9, 137.8, 136.6, 135.2, 135.1, 134.5, 132.0, 130.2, 129.4 (2C), 129.1 (2C), 128.1, 127.3, 125.2, 121.0, 119.0, 117.7, 77.0, 43.0, 42.6; **HRMS** (ESI) Calcd for

C<sub>23</sub>H<sub>19</sub>ClNO<sub>3</sub> [M+H]<sup>+</sup> 392.1048; found 392.1053; [α]<sup>18</sup><sub>D</sub> = -29.5 (c = 0.4, CHCl<sub>3</sub>); HPLC analysis: ee = 91%; CHIRALPAK®IC (70% hexanes: 30% isopropanol, 1 mL/min) t<sub>minor</sub> = 11.3 min, t<sub>major</sub> = 13.2 min.

**(S)-N-(3-Benzyl-4-formyl-2,3-dihydrobenzofuran-5-yl)-2-fluorobenzamide**

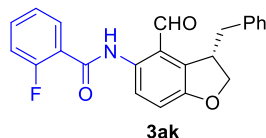

By following the general procedure, the reaction of **1a** (36.1 mg, 0.15 mmol) with **2k** (69.4 mg, 0.375 mmol), [Cp\*RhCl<sub>2</sub>]<sub>2</sub> (4.5 mg, 0.0075 mmol), KH<sub>2</sub>PO<sub>4</sub> (30.7 mg, 0.225 mmol), AgSbF<sub>6</sub> (13.4 mg, 0.03 mmol), (R)-(+)-1-(1-naphthyl)ethylamine (12.0 μL, 0.075 mmol), and *N*-Phthaloyl-L-Phenylalanine (13.3 mg, 0.045 mmol) afforded **3ak** (49.5 mg, 88% yield). Yellow solid; <sup>1</sup>H NMR (400 MHz, CDCl<sub>3</sub>) δ 11.64 (d, *J* = 7.8 Hz, 1H), 9.65 (s, 1H), 8.74 (d, *J* = 9.0 Hz, 1H), 8.03 (td, *J* = 7.7, 1.9 Hz, 1H), 7.53–7.46 (m, 1H), 7.33–7.23 (m, 4H), 7.21–7.15 (m, 1H), 7.12 (d, *J* = 9.0 Hz, 1H), 7.09–7.05 (m, 2H), 4.56–4.45 (m, 2H), 3.97 (qd, *J* = 7.4, 2.0 Hz, 1H), 2.99–2.87 (m, 2H); <sup>13</sup>C NMR (101 MHz, CDCl<sub>3</sub>) δ 191.5, 162.6 (d, *J* = 2.7 Hz), 160.3 (d, *J* = 250.8 Hz), 156.1, 137.9, 134.9, 133.8, 133.6 (d, *J* = 8.9 Hz), 131.7 (d, *J* = 2.1 Hz), 129.4 (2C), 129.0 (2C), 127.2, 124.8 (d, *J* = 3.5 Hz), 122.7 (d, *J* = 12.1 Hz), 122.0, 119.6, 117.1, 116.6 (d, *J* = 23.6 Hz), 76.8, 42.9, 42.5; HRMS (ESI) Calcd for C<sub>23</sub>H<sub>19</sub>FNO<sub>3</sub> [M+H]<sup>+</sup> 376.1343; found 376.1342; [α]<sup>18</sup><sub>D</sub> = +22.1 (c = 0.4, CHCl<sub>3</sub>); HPLC analysis: ee = 90%; CHIRALPAK®IC (70% hexanes: 30% isopropanol, 1 mL/min) t<sub>minor</sub> = 13.8 min, t<sub>major</sub> = 18.2 min.

**(S)-N-(3-Benzyl-4-formyl-2,3-dihydrobenzofuran-5-yl)-2-naphthamide**

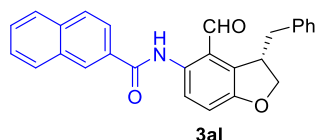

By following the general procedure, the reaction of **1a** (35.8 mg, 0.15 mmol) with **2l** (81.2 mg, 0.375 mmol), [Cp\*RhCl<sub>2</sub>]<sub>2</sub> (4.9 mg, 0.0075 mmol), KH<sub>2</sub>PO<sub>4</sub> (30.7 mg, 0.225 mmol), AgSbF<sub>6</sub> (11.8 mg, 0.03 mmol), (R)-(+)-1-(1-naphthyl)ethylamine (12.0 μL, 0.075 mmol), and *N*-Phthaloyl-L-Phenylalanine (13.2 mg, 0.045 mmol) afforded **3al** (51.1 mg, 84% yield). Yellow solid; <sup>1</sup>H NMR (400 MHz, CDCl<sub>3</sub>) δ 12.04 (s, 1H), 9.62 (s, 1H), 8.87 (d, *J* = 9.0 Hz, 1H), 8.55 (s, 1H), 8.08 (dd, *J* = 8.6, 1.9 Hz, 1H), 8.01 (dd, *J* = 7.1, 2.2 Hz, 1H), 7.96 (d, *J* = 8.6 Hz, 1H), 7.92–7.87 (m, 1H), 7.62–7.52 (m, 2H), 7.35–7.26 (m, 3H), 7.17 (d, *J* = 9.0 Hz, 1H), 7.10–7.05 (m, 2H), 4.58–4.48 (m, 2H), 4.01–3.92 (m, 1H), 2.99 (dd, *J* = 13.7, 8.0 Hz, 1H), 2.92 (dd, *J* = 13.6, 7.4 Hz, 1H); <sup>13</sup>C NMR (101 MHz, CDCl<sub>3</sub>) δ 192.4, 165.9, 155.7, 137.9, 135.1, 135.0 (2C), 132.8, 132.0, 129.47, 129.45 (2C), 129.1 (2C), 128.8, 128.5, 128.0, 127.9, 127.3, 126.9, 123.7, 121.0, 119.0, 117.8, 76.9, 43.0, 42.6; HRMS (ESI) Calcd for C<sub>27</sub>H<sub>22</sub>NO<sub>3</sub> [M+H]<sup>+</sup> 408.1594;

found 408.1599;  $[\alpha]^{18}_{\text{D}} = -33.8$  ( $c = 0.4$ ,  $\text{CHCl}_3$ ); HPLC analysis: ee = 90%; CHIRALPAK®IC (70% hexanes: 30% isopropanol, 1 mL/min)  $t_{\text{minor}} = 18.0$  min,  $t_{\text{major}} = 19.8$  min.

**(S)-N-(3-Benzyl-4-formyl-2,3-dihydrobenzofuran-5-yl)-3-phenylpropanamide**

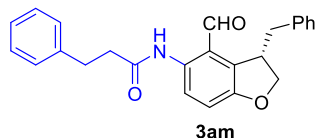

By following the general procedure, the reaction of **1a** (35.9 mg, 0.15 mmol) with **2m** (66.1 mg, 0.375 mmol),  $[\text{Cp}^*\text{RhCl}_2]_2$  (4.7 mg, 0.0075 mmol),  $\text{KH}_2\text{PO}_4$  (30.7 mg, 0.225 mmol),  $\text{AgSbF}_6$  (12.8 mg, 0.03 mmol), (R)-(+)-1-(1-naphthyl)ethylamine (12.0  $\mu\text{L}$ , 0.075 mmol), and *N*-Phthaloyl-L-Phenylalanine (13.2 mg, 0.045 mmol) afforded **3am** (27.8 mg, 48% yield). Yellow solid;  $^1\text{H}$  NMR (400 MHz,  $\text{CDCl}_3$ )  $\delta$  10.88 (s, 1H), 9.54 (s, 1H), 8.57 (d,  $J = 9.0$  Hz, 1H), 7.33–7.23 (m, 7H), 7.22–7.17 (m, 1H), 7.09 (d,  $J = 9.0$  Hz, 1H), 7.07–7.02 (m, 2H), 4.52 (dd,  $J = 9.0, 2.0$  Hz, 1H), 4.47 (dd,  $J = 9.0, 7.1$  Hz, 1H), 3.96–3.88 (m, 1H), 3.10–3.02 (m, 2H), 2.94 (dd,  $J = 13.6, 8.1$  Hz, 1H), 2.87 (dd,  $J = 13.6, 7.3$  Hz, 1H), 2.76–2.69 (m, 2H);  $^{13}\text{C}$  NMR (101 MHz,  $\text{CDCl}_3$ )  $\delta$  192.0, 171.2, 155.6, 140.7, 137.9, 134.7, 134.5, 129.4 (2C), 129.0 (2C), 128.6 (2C), 128.5 (2C), 127.2, 126.4, 121.0, 118.6, 117.5, 76.8, 42.9, 42.6, 40.1, 31.5; HRMS (ESI) Calcd for  $\text{C}_{25}\text{H}_{24}\text{NO}_3$   $[\text{M}+\text{H}]^+$  386.1751; found 386.1784;  $[\alpha]^{18}_{\text{D}} = +114.4$  ( $c = 0.2$ ,  $\text{CHCl}_3$ ); HPLC analysis: ee = 87%; CHIRALPAK®IC (70% hexanes: 30% isopropanol, 1 mL/min)  $t_{\text{minor}} = 10.9$  min,  $t_{\text{major}} = 15.9$  min.

**(S)-N-(3-Benzyl-4-formyl-2,3-dihydrobenzofuran-5-yl)cyclohexanecarboxamide**

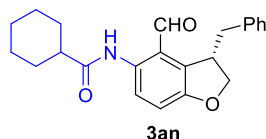

By following the general procedure, the reaction of **1a** (36.3 mg, 0.15 mmol) with **2n** (63.9 mg, 0.375 mmol),  $[\text{Cp}^*\text{RhCl}_2]_2$  (4.6 mg, 0.0075 mmol),  $\text{KH}_2\text{PO}_4$  (31.0 mg, 0.225 mmol),  $\text{AgSbF}_6$  (13.2 mg, 0.03 mmol), (R)-(+)-1-(1-naphthyl)ethylamine (12.0  $\mu\text{L}$ , 0.075 mmol), and *N*-Phthaloyl-L-Phenylalanine (13.5 mg, 0.045 mmol) afforded **3an** (28.4 mg, 52% yield). Yellow solid;  $^1\text{H}$  NMR (400 MHz,  $\text{CDCl}_3$ )  $\delta$  10.93 (s, 1H), 9.59 (s, 1H), 8.62 (d,  $J = 9.0$  Hz, 1H), 7.35–7.27 (m, 3H), 7.11–7.04 (m, 3H), 4.53 (dd,  $J = 9.0, 2.0$  Hz, 1H), 4.48 (dd,  $J = 9.0, 7.1$  Hz, 1H), 3.98–3.89 (m, 1H), 2.96 (dd,  $J = 13.6, 8.1$  Hz, 1H), 2.89 (dd,  $J = 13.6, 7.3$  Hz, 1H), 2.34–2.24 (m, 1H), 2.04–1.95 (m, 2H), 1.88–1.79 (m, 2H), 1.74–1.67 (m, 1H), 1.60–1.47 (m, 2H), 1.40–1.22 (m, 3H);  $^{13}\text{C}$  NMR (101 MHz,  $\text{CDCl}_3$ )  $\delta$  192.1, 175.5, 155.4, 138.0, 134.9, 134.7, 129.4 (2C), 129.0 (2C), 127.3, 121.0, 118.7, 117.6, 76.8, 47.2, 43.0, 42.6, 29.8, 29.7, 25.87 (2C), 25.85; HRMS (ESI) Calcd for  $\text{C}_{23}\text{H}_{26}\text{NO}_3$   $[\text{M}+\text{H}]^+$  364.1907; found 364.1928;  $[\alpha]^{18}_{\text{D}} = +36.4$

( $c = 0.2$ ,  $\text{CHCl}_3$ ); HPLC analysis:  $ee = 88\%$ ; CHIRALPAK®IC (70% hexanes: 30% isopropanol, 1 mL/min)  $t_{\text{minor}} = 8.0$  min,  $t_{\text{major}} = 12.5$  min.

### (S)-N-(3-Benzyl-4-formyl-2,3-dihydrobenzofuran-5-yl)dodecanamide

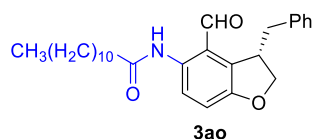

By following the general procedure, the reaction of **1a** (35.9 mg, 0.15 mmol) with **2o** (85.2 mg, 0.375 mmol),  $[\text{Cp}^*\text{RhCl}_2]_2$  (4.8 mg, 0.0075 mmol),  $\text{KH}_2\text{PO}_4$  (31.1 mg, 0.225 mmol),  $\text{AgSbF}_6$  (12.9 mg, 0.03 mmol), (R)-(+)-1-(1-naphthyl)ethylamine (12.0  $\mu\text{L}$ , 0.075 mmol), and *N*-Phthaloyl-L-Phenylalanine (13.2 mg, 0.045 mmol) afforded **3ao** (39.4 mg, 60% yield). Yellow solid;  $^1\text{H NMR}$  (400 MHz,  $\text{CDCl}_3$ )  $\delta$  10.89 (s, 1H), 9.58 (s, 1H), 8.59 (d,  $J = 9.0$  Hz, 1H), 7.34–7.27 (m, 3H), 7.09 (d,  $J = 9.0$  Hz, 1H), 7.08–7.04 (m, 2H), 4.55–4.44 (m, 2H), 3.97–3.89 (m, 1H), 2.99–2.85 (m, 2H), 2.40 (t,  $J = 7.6$  Hz, 2H), 1.76–1.70 (m, 2H), 1.37–1.20 (m, 16H), 0.91–0.84 (m, 3H);  $^{13}\text{C NMR}$  (101 MHz,  $\text{CDCl}_3$ )  $\delta$  192.0, 172.5, 155.4, 138.0, 134.72, 134.66, 129.4 (2C), 129.0 (2C), 127.2, 120.9, 118.5, 117.6, 76.8, 43.0, 42.6, 38.7, 32.0, 29.7 (2C), 29.6, 29.5 (2C), 29.3, 25.7, 22.8, 14.3; **HRMS** (ESI) Calcd for  $\text{C}_{28}\text{H}_{38}\text{NO}_3$   $[\text{M}+\text{H}]^+$  436.2846; found 436.2856;  $[\alpha]_D^{18} = +41.6$  ( $c = 0.2$ ,  $\text{CHCl}_3$ ); HPLC analysis:  $ee = 86\%$ ; CHIRALPAK®IC (70% hexanes: 30% isopropanol, 1 mL/min)  $t_{\text{minor}} = 7.1$  min,  $t_{\text{major}} = 8.4$  min.

## 6. Procedure for the Synthesis of Int-1

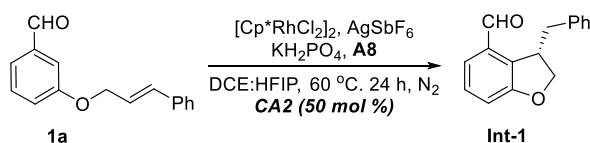

To a 25 mL Schlenk tube equipped with a magnetic stirring bar were added substrate **1a** (0.15 mmol),  $[\text{Cp}^*\text{RhCl}_2]_2$  (5 mol%),  $\text{AgSbF}_6$  (20 mol%),  $\text{KH}_2\text{PO}_4$  (0.375 mmol) and acid (0.3 equiv.) under air. The mixture was then evacuated and backfilled with nitrogen for three times. After that, amine (50 mol%), HFIP (0.9 mL) and DCE (0.9 mL) were added subsequently. After stirring at 60  $^\circ\text{C}$  for 24 h, the reaction mixture was cooled to room temperature. The solvent was removed under reduced pressure, and the residue was purified by flash chromatography on silica gel with petroleum ether/ethyl acetate (50 : 1) as the eluent to give **Int-1**.  $^1\text{H NMR}$  (400 MHz,  $\text{CDCl}_3$ )  $\delta$  9.97 (s, 1H), 7.45–7.16 (m, 7H), 7.05 (d,  $J = 7.1$  Hz, 1H), 4.51 (d,  $J = 9.1$  Hz, 1H), 4.36 (t,  $J = 8.5$  Hz, 1H), 4.18–4.04 (m, 1H), 3.10 (dd,  $J = 13.4, 4.1$  Hz, 1H), 2.59 (dd,  $J = 13.5, 10.0$  Hz, 1H);  $^{13}\text{C NMR}$  (101 MHz,  $\text{CDCl}_3$ )  $\delta$  192.3, 161.0, 139.4, 133.0, 131.7, 129.4 (2C), 129.2, 128.7 (2C), 126.6, 125.2, 115.6, 76.3, 43.6, 40.1; **HRMS** (ESI) Calcd for  $\text{C}_{16}\text{H}_{14}\text{O}_2$   $[\text{M}+\text{H}]^+$  239.1067; found 239.1067.

## 7. Procedure for the Synthesis of Int-1'

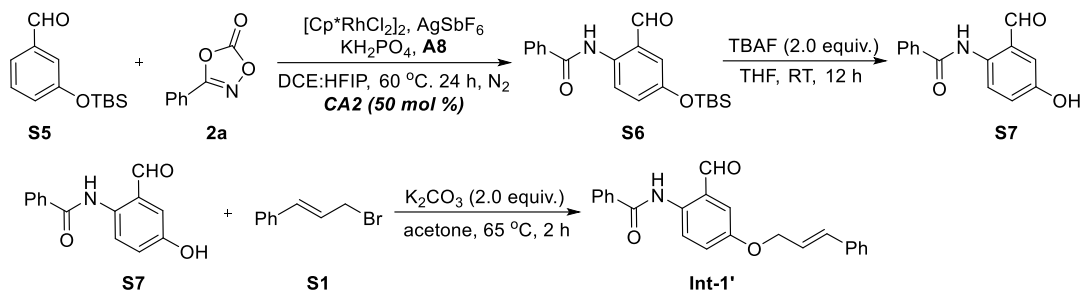

To a 25 mL Schlenk flask equipped with a magnetic stirring bar were added substrate **S5** (0.75 mmol), **2a** (2.5 equiv.),  $[\text{Cp}^*\text{RhCl}_2]_2$  (5 mol%),  $\text{AgSbF}_6$  (20 mol%),  $\text{KH}_2\text{PO}_4$  (1.5 equiv.) and acid (0.3 equiv.) under air. The mixture was then evacuated and backfilled with nitrogen for three times. After that, amine (50 mol%), HFIP (6 mL) and DCE (6 mL) were added subsequently. After stirring at 60 °C for 24 h, the reaction mixture was cooled to room temperature. The solvent was removed under reduced pressure, and the residue was purified by flash chromatography on silica gel with petroleum ether/ethyl acetate (10 : 1) as the eluent to give **S6**.

To a 20 mL vial were added **S6** (0.5 mmol), TBAF (1.0 mmol) and THF (8 mL). The mixture was stirred at room temperature for 12 h. The solvent was removed and the reaction mixture was extracted with  $\text{H}_2\text{O}$  (8 mL) and ethyl acetate (8 mL). The organic phase was dried over anhydrous  $\text{Na}_2\text{SO}_4$ , filtration and removed all of organic solvent. The crude **S7** was directly used for the next step without any purification.

To a 10 mL round flask equipped with a stirring bar was added the crude **S7** (0.5 mmol) and  $\text{K}_2\text{CO}_3$  (1.0 mmol) in acetone (5 mL), followed by allyl bromide (1.0 mmol). The mixture was stirred at 65 °C for 2 h. The solvent was removed and the reaction mixture was extracted with  $\text{H}_2\text{O}$  (6 mL) and ethyl acetate (6 mL). The organic phase was dried over anhydrous  $\text{Na}_2\text{SO}_4$ , filtration and removed all of organic solvent. The residue was purified by flash chromatography with petroleum ether/ethyl acetate (10 : 1) as the eluent to give **Int-1'**.  $^1\text{H}$  NMR (400 MHz,  $\text{CDCl}_3$ )  $\delta$  11.85 (s, 1H), 9.96 (s, 1H), 8.93 (d,  $J$  = 9.0 Hz, 1H), 8.08–8.03 (m, 2H), 7.60–7.50 (m, 3H), 7.45–7.40 (m, 2H), 7.38–7.27 (m, 5H), 6.77 (d,  $J$  = 16.0 Hz, 1H), 6.42 (dt,  $J$  = 16.0, 5.8 Hz, 1H), 4.78 (dd,  $J$  = 5.8, 1.5 Hz, 2H);  $^{13}\text{C}$  NMR (101 MHz,  $\text{CDCl}_3$ )  $\delta$  195.7, 166.0, 154.3, 136.3, 135.3, 134.6, 133.8, 132.2, 129.0 (2C), 128.8 (2C), 128.3, 127.6 (2C), 126.8 (2C), 123.8, 123.3, 123.0, 121.9, 121.1, 69.4. HRMS (ESI) Calcd for  $\text{C}_{23}\text{H}_{20}\text{NO}_3$   $[\text{M}+\text{H}]^+$  358.1438; found 358.1438.

## 8. Procedure for Rh-Catalyzed C-H Activation with Int-1

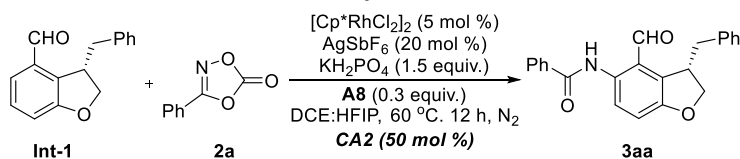

To a 10 mL of Schlenk tube equipped with a magnetic stirring bar were added substrate

**Int-1** (0.05 mmol), **2a** (0.125 mmol), [Cp\*RhCl<sub>2</sub>]<sub>2</sub> (5 mol%), AgSbF<sub>6</sub> (20 mol%), KH<sub>2</sub>PO<sub>4</sub> (0.075 mmol) and acid (0.3 equiv.) under air. The mixture was then evacuated and backfilled with nitrogen for three times. After that, chiral amine (50 mol%), HFIP (0.3 mL) and DCE (0.3 mL) were added subsequently. After stirring at 60 °C for 12 h, the reaction mixture was cooled to room temperature. The solvent was removed under reduced pressure, and the residue was purified by flash chromatography on silica gel with petroleum ether/ethyl acetate (10 : 1) as the eluent to give the corresponding product **3aa** (72%).

## 9. Procedure for Rh-Catalyzed C-H Activation with Int-1'

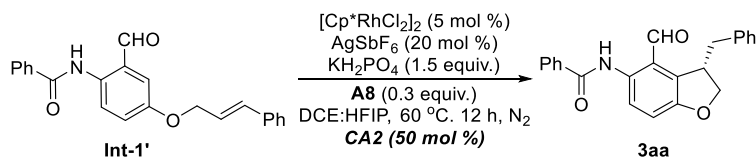

To a 10 mL of Schlenk tube equipped with a magnetic stirring bar were added substrate **Int-1'** (0.05 mmol), [Cp\*RhCl<sub>2</sub>]<sub>2</sub> (5 mol%), AgSbF<sub>6</sub> (20 mol%), KH<sub>2</sub>PO<sub>4</sub> (0.075 mmol) and acid (0.3 equiv.) under air. The mixture was then evacuated and backfilled with nitrogen for three times. After that, chiral amine (50 mol%), HFIP (0.3 mL) and DCE (0.3 mL) were added subsequently. After stirring at 60 °C for 12 h, the reaction mixture was cooled to room temperature. The solvent was removed under reduced pressure, and the residue was purified by flash chromatography on silica gel with petroleum ether/ethyl acetate (10 : 1) as the eluent to give the corresponding product **3aa** (57%).

## 10. Crude <sup>1</sup>H NMR with 1,3,5-Trimethoxybenzene as Internal Standard

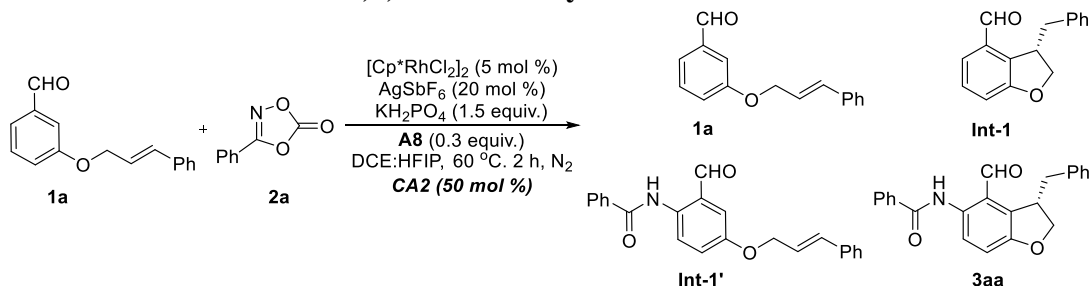

To a 10 mL of Schlenk tube equipped with a magnetic stirring bar were added substrate **1a** (0.05 mmol), **2a** (0.125 mmol), [Cp\*RhCl<sub>2</sub>]<sub>2</sub> (5 mol%), AgSbF<sub>6</sub> (20 mol%), KH<sub>2</sub>PO<sub>4</sub> (0.075 mmol) and acid (0.3 equiv.) under air. The mixture was then evacuated and backfilled with nitrogen for three times. After that, chiral amine (50 mol%), HFIP (0.3 mL) and DCE (0.3 mL) were added subsequently. After stirring at 60 °C for 2 h, the reaction mixture was cooled to room temperature. The solvent was removed under reduced pressure, and the residue was filtered on silica gel with ethyl acetate as the eluent. The crude residue was added internal standard (1,3,5-trimethoxybenzene, 0.05 mmol) and checked <sup>1</sup>H NMR. The specific signals of these compounds (peak a for **1a**, peak b for **3aa**, peak c for **Int-1**, peak d for **Int-1'**) and the crude <sup>1</sup>H NMR were labeled below.

**Figure S1.** Comparison of different components for 2 h.

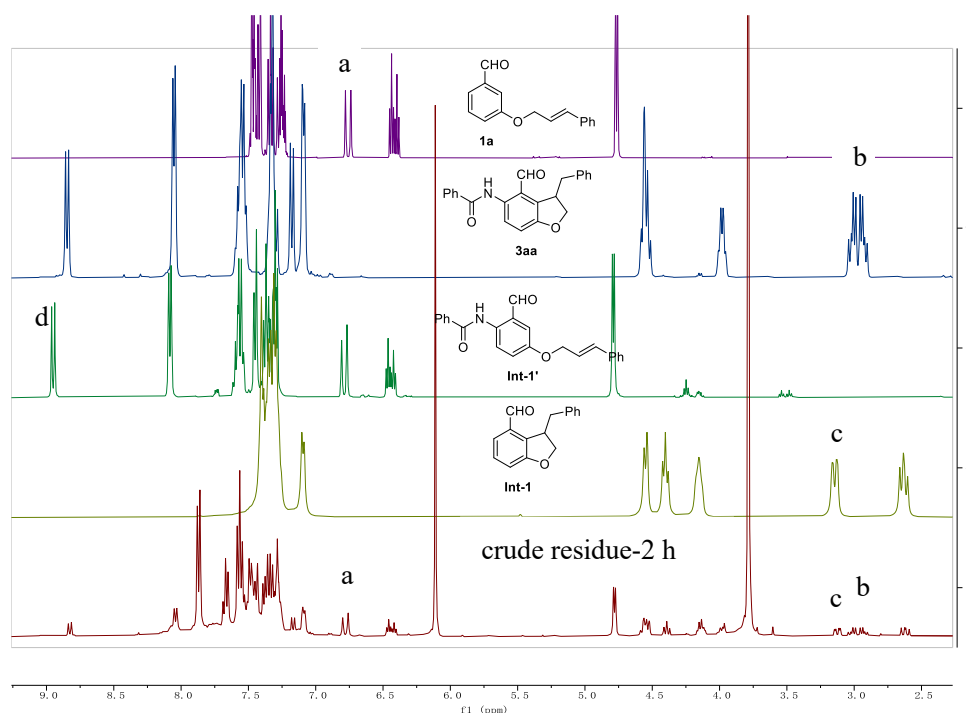

**Figure S2.** NMR yields for 2 h.

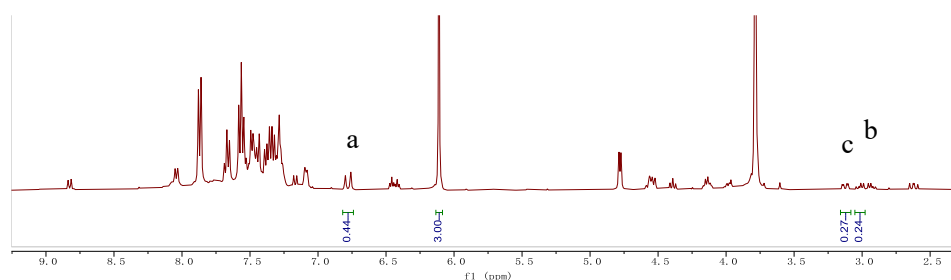

## 11. Procedure for the Synthesis of Int-2.

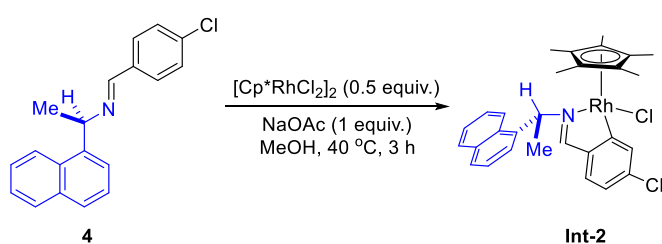

To a 10 mL of Schlenk tube equipped with a magnetic stirring bar were added imine **4** (29.4 mg, 0.1 mmol),  $[\text{Cp}^*\text{RhCl}_2]_2$  (31.0 mg, 0.05 mmol), NaOAc (8.3 mg, 0.1 mmol), 4-Clbenzaldehyde (7.2 mg, 0.05 mmol) and MeOH (1 mL). The mixture was stirred at 40 °C for 3 h. After removing all of the solvent, the crude product was purified by column chromatography on silica gel (petroleum ether/ethyl acetate = 3 : 1) to get the pure compound **Int-2** (36.1 mg, 64%).  $^1\text{H NMR}$  (400 MHz,  $\text{CDCl}_3$ )  $\delta$  7.94 (d,  $J = 7.3$  Hz, 1H), 7.90 (d,  $J = 7.9$  Hz, 2H), 7.70 (d,  $J = 1.9$  Hz, 1H), 7.61 (d,  $J = 3.2$  Hz, 1H), 7.58–7.45 (m, 4H), 7.06 (d,  $J = 8.0$  Hz, 1H), 6.89 (dd,  $J = 8.0, 1.9$  Hz, 1H), 6.02 (q,  $J =$

7.0 Hz, 1H), 2.09 (d,  $J$  = 7.0 Hz, 3H), 1.71 (s, 15H);  $^{13}\text{C}$  NMR (101 MHz,  $\text{CDCl}_3$ )  $\delta$  184.4 (d,  $J$  = 33.8 Hz), 170.7 (d,  $J$  = 1.5 Hz), 144.2, 136.3 (d,  $J$  = 1.9 Hz), 135.5, 135.4, 134.1, 131.3, 129.4, 129.30, 129.27, 126.8, 126.0, 125.8, 125.6, 123.4, 122.8, 96.5 (d,  $J$  = 6.2 Hz, 5C), 63.6, 21.8, 9.6 (5C); **HRMS** (ESI) Calcd for  $\text{C}_{29}\text{H}_{30}\text{Cl}_2\text{NaNRh}$   $[\text{M}+\text{Na}]^+$  588.0703; found 588.0704.

## 12. Procedure for the Synthesis of 5.

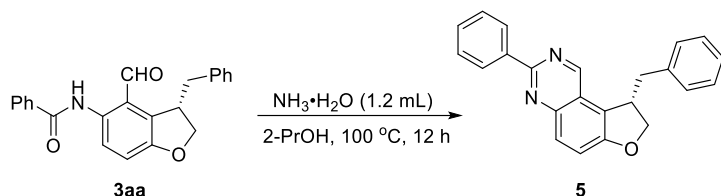

To a 10 mL of Schlenk tube equipped with a magnetic stirring bar were added **3aa** (35.7 mg, 0.1 mmol), 25%  $\text{NH}_3 \cdot \text{H}_2\text{O}$  (1.2 mL) and 2-propanol (0.8 mL). The reaction mixture was stirred at 100 °C for 12 h. After removing all of the solvent, the crude product was purified by column chromatography on silica gel (petroleum ether/ethyl acetate = 10 : 1) to get the pure compound **5** (24.4 mg, 72% yield).  $^1\text{H}$  NMR (400 MHz,  $\text{CDCl}_3$ )  $\delta$  9.12 (s, 1H), 8.58–8.52 (m, 2H), 7.94 (d,  $J$  = 9.0 Hz, 1H), 7.56–7.44 (m, 4H), 7.33–7.23 (m, 3H), 7.16–7.10 (m, 2H), 4.70–4.61 (m, 2H), 4.20–4.10 (m, 1H), 3.24 (dd,  $J$  = 13.8, 5.6 Hz, 1H), 2.94 (dd,  $J$  = 13.8, 9.1 Hz, 1H);  $^{13}\text{C}$  NMR (101 MHz,  $\text{CDCl}_3$ )  $\delta$  158.6, 158.4, 155.7, 147.2, 138.6, 138.3, 130.34, 130.26, 129.2 (2C), 129.0 (2C), 128.7 (2C), 128.2 (2C), 127.0, 122.2, 121.0, 120.3, 77.6, 43.1, 41.5; **HRMS** (ESI) Calcd for  $\text{C}_{23}\text{H}_{19}\text{N}_2\text{O}$   $[\text{M}+\text{H}]^+$  339.1492; found 339.1488.

## 13. Procedure for the Synthesis of 6.

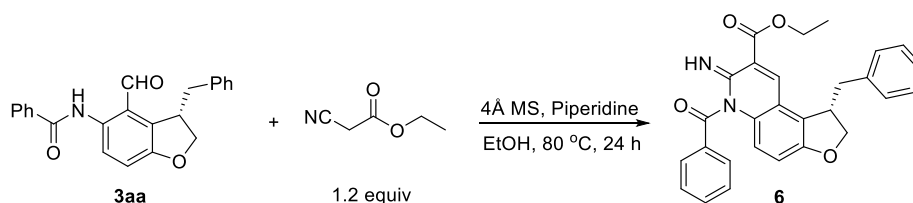

To a 10 mL of Schlenk tube equipped with a magnetic stirring bar were added **3aa** (35.8 mg, 0.1 mmol), 4Å molecular sieves (30.8 mg), ethylcyanoacetate (13  $\mu\text{L}$ , 0.12 mmol, 1.2 equiv.), piperidine (0.2  $\mu\text{L}$ , 2%, 2  $\mu\text{mol}$ ) and ethanol (1 mL). The reaction mixture was stirred under nitrogen at 80 °C for 24 h. After removing all of the solvent, the crude product was purified by column chromatography on silica gel (petroleum ether/ethyl acetate = 5 : 1) to get the pure compound **6** (31.8 mg, 70% yield).  $^1\text{H}$  NMR (400 MHz,  $\text{CDCl}_3$ )  $\delta$  11.60 (s, 1H), 8.32 (s, 1H), 8.09 (d,  $J$  = 6.8 Hz, 2H), 7.98 (d,  $J$  = 9.0 Hz, 1H), 7.60–7.49 (m, 3H), 7.39 (d,  $J$  = 9.0 Hz, 1H), 7.28–7.17 (m, 3H), 7.06 (d,  $J$  = 5.8 Hz, 2H), 4.67 (t,  $J$  = 8.5 Hz, 1H), 4.61 (dd,  $J$  = 9.1, 2.8 Hz, 1H), 4.54–4.35 (m, 2H), 4.10–4.01 (m, 1H), 3.11 (dd,  $J$  = 13.7, 6.8 Hz, 1H), 2.97 (dd,  $J$  = 13.7, 7.9 Hz, 1H), 1.46 (t,  $J$  = 7.1 Hz, 3H);  $^{13}\text{C}$  NMR (101 MHz,  $\text{CDCl}_3$ )  $\delta$  167.2, 164.7, 157.6, 147.0, 145.0, 138.9,



115.6, 76.0, 47.1 (2C), 44.6, 39.8. **HRMS** (ESI) Calcd for C<sub>18</sub>H<sub>20</sub>NO<sub>2</sub> [M+H]<sup>+</sup> 282.1489; found 282.1490.

## 16. Procedure for the Synthesis of 9.

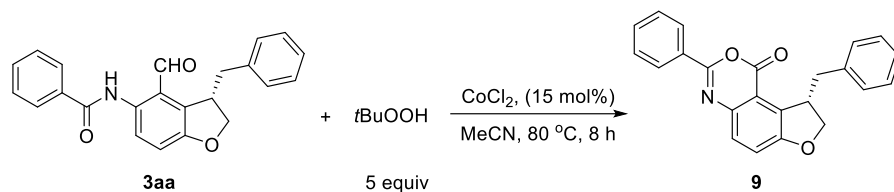

To a 10 mL of Schlenk tube equipped with a magnetic stirring bar were added **3aa** (36.0 mg, 0.1 mmol), CoCl<sub>2</sub> (2.0 mg, 15 mol%), TBHP (70% in H<sub>2</sub>O, 70.5 μL, 5.0 equiv.) and MeCN (0.4 mL). The reaction mixture was stirred at 80 °C for 8 h. The mixed solution was extracted with H<sub>2</sub>O (5 mL) and ethyl acetate (10 mL). The organic phase was dried over anhydrous Na<sub>2</sub>SO<sub>4</sub>, filtration and removed all of organic solvent. The crude product was purified by column chromatography on silica gel (petroleum ether/ethyl acetate = 10 : 1) to get the pure compound **9** (26.2 mg, 58%). **<sup>1</sup>H NMR** (400 MHz, CDCl<sub>3</sub>) δ 8.32–8.26 (m, 2H), 7.59–7.48 (m, 4H), 7.36–7.31 (m, 4H), 7.29–7.23 (m, 2H), 4.62 (dd, *J* = 9.1, 2.3 Hz, 1H), 4.47 (t, *J* = 8.5 Hz, 1H), 4.30–4.21 (m, 1H), 3.34 (dd, *J* = 13.4, 3.2 Hz, 1H), 2.64 (dd, *J* = 13.4, 10.6 Hz, 1H); **<sup>13</sup>C NMR** (101 MHz, CDCl<sub>3</sub>) δ 160.3, 158.9, 154.8, 141.7, 139.4, 132.2, 131.9, 130.6, 129.4 (2C), 128.9 (2C), 128.7 (2C), 128.3, 128.0 (2C), 126.7, 118.7, 114.0, 76.9, 44.8, 40.0; **HRMS** (ESI) Calcd for C<sub>23</sub>H<sub>18</sub>NO<sub>3</sub> [M+H]<sup>+</sup> 356.1281; found 356.1287.

## 17. General Procedure for the Synthesis of 10.

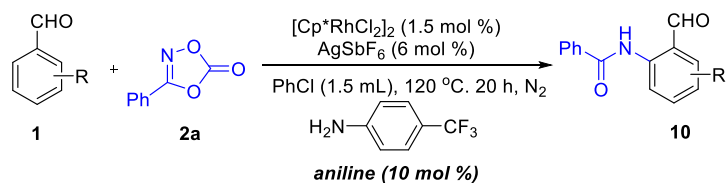

To a 25 mL of Schlenk tube equipped with a magnetic stirring bar were added **2a** (0.45 mmol), [Cp<sup>\*</sup>RhCl<sub>2</sub>]<sub>2</sub> (1.5 mol%) and AgSbF<sub>6</sub> (6 mol%) under air. The mixture was then evacuated and backfilled with nitrogen for three times. After that, aldehyde (0.3 mmol), 4-trifluoromethyl aniline (10 mol%) and PhCl (1.5 mL) were added subsequently. After stirring at 120 °C for 20 h, the reaction mixture was cooled to room temperature. The solvent was removed under reduced pressure, and the residue was purified by flash chromatography on silica gel with petroleum ether/ethyl acetate (5 : 1) as the eluent to give the corresponding products **10**. **10a–10c** are known compounds.<sup>3</sup>

Compound **10d** (74%): **<sup>1</sup>H NMR** (400 MHz, CDCl<sub>3</sub>) δ 12.27 (s, 1H), 10.56 (s, 1H), 8.79 (d, *J* = 9.3 Hz, 1H), 8.08–8.03 (m, 2H), 7.59–7.49 (m, 3H), 7.18 (d, *J* = 9.3 Hz, 1H), 3.87 (s, 3H), 2.57 (s, 3H); **<sup>13</sup>C NMR** (101 MHz, CDCl<sub>3</sub>) δ 195.4, 166.1, 153.2,

135.2, 135.0, 132.0, 131.8, 128.9 (2C), 127.6 (2C), 120.9, 118.8 (2C), 56.4, 10.4; **HRMS** (ESI) Calcd for C<sub>16</sub>H<sub>16</sub>NO<sub>3</sub> [M+H]<sup>+</sup> 270.1225; found 270.1227.

Compound **10e** (71%): **<sup>1</sup>H NMR** (400 MHz, CDCl<sub>3</sub>)  $\delta$  11.88 (s, 1H), 10.18 (s, 1H), 8.77 (d, *J* = 8.9 Hz, 1H), 8.05 (d, *J* = 7.9 Hz, 2H), 7.58–7.49 (m, 3H), 7.11 (d, *J* = 9.0 Hz, 1H), 4.70 (t, *J* = 8.8 Hz, 2H), 3.59 (t, *J* = 8.7 Hz, 2H); **<sup>13</sup>C NMR** (101 MHz, CDCl<sub>3</sub>)  $\delta$  193.4, 165.8, 156.3, 134.9, 134.8, 132.1, 132.0, 129.0 (2C), 127.5 (2C), 120.6, 118.8, 117.5, 71.6, 28.4; **HRMS** (ESI) Calcd for C<sub>16</sub>H<sub>14</sub>NO<sub>3</sub> [M+H]<sup>+</sup> 268.0968; found 268.0970.

## 18. Cellular studies of **3al** and **3ao**.

**18.1 Cell culture:** Human cervical cancer cells (HeLa) were cultured in 25 cm<sup>3</sup> culture flasks containing RMPI-1640 medium supplemented with heat-inactivated 10% fetal bovine serum, 100 units mL<sup>-1</sup> penicillin, and 100  $\mu$ g/mL streptomycin at 37 °C in a humidified incubator containing 5% CO<sub>2</sub>.

**18.2 Cytotoxicity:** The cytotoxicity of the **3al/3ao** was evaluated on HeLa cells. These cells were seeded into 96-well plates with a density of 5000 cells per well and cultured overnight. Then, **3al/3ao** solutions with a series of concentrations were added and incubated with cells for 24 h. Each experiment was performed for six times. The working solutions were then removed, and the cells were washed with PBS buffer. A total of 10  $\mu$ L of CCK-8 (Cell Counting Kit-8, BIOMIKY) was added into each well (total 100  $\mu$ L), and the cells were further incubated at 37 °C for 2 h. Then the plate was shaken for 25 min (protection from light), and the absorbance at 450 nm was measured with a microplate reader (Multiskan Sky).

**18.3 Colocalization imaging:** HeLa cells were seeded onto a confocal dish (Nest Scientific) at a density of  $3 \times 10^4$  cells 24 h before the microscopy measurement. For LDs colocalization study, after removed of the culture medium, the HeLa cells were co-incubated with **3al/3ao** (3  $\mu$ M) and Nile Red (1  $\mu$ M) in 1.0 mL of fresh culture medium for 1 h. Then, the morphologies of the cells were observed using a confocal fluorescence microscope ( $\lambda_{\text{ex}}$ : 405 nm,  $\lambda_{\text{em}}$ : 440-530 nm for **3al/3ao**;  $\lambda_{\text{ex}}$ : 552 nm,  $\lambda_{\text{em}}$ : 650-800 nm for Nile Red). No washing steps were performed.

**18.4 Multicolor imaging:** HeLa cells were seeded onto a confocal dish (Nest Scientific) at a density of  $3 \times 10^4$  cells 24 h before the microscopy measurement. After removed of the culture medium, the HeLa cells were co-incubated with **3al/3ao** (3  $\mu$ M) and DIR (1  $\mu$ M) in 1.0 mL of fresh culture medium for 1 h. Then, the morphologies of the cells were observed using a confocal fluorescence microscope ( $\lambda_{\text{ex}}$ : 405 nm,  $\lambda_{\text{em}}$ : 440-530 nm for **3al/3ao**;  $\lambda_{\text{ex}}$ : 638 nm,  $\lambda_{\text{em}}$ : 650-800 nm for DIR). No washing steps were performed.

## 19. NMR and HPLC Spectra of 1a-1za, 3aa-3zaa, 3ab-3ao, Int-1-10e

### $^1\text{H}$ NMR (400 MHz, $\text{CDCl}_3$ ) of compound **1a**

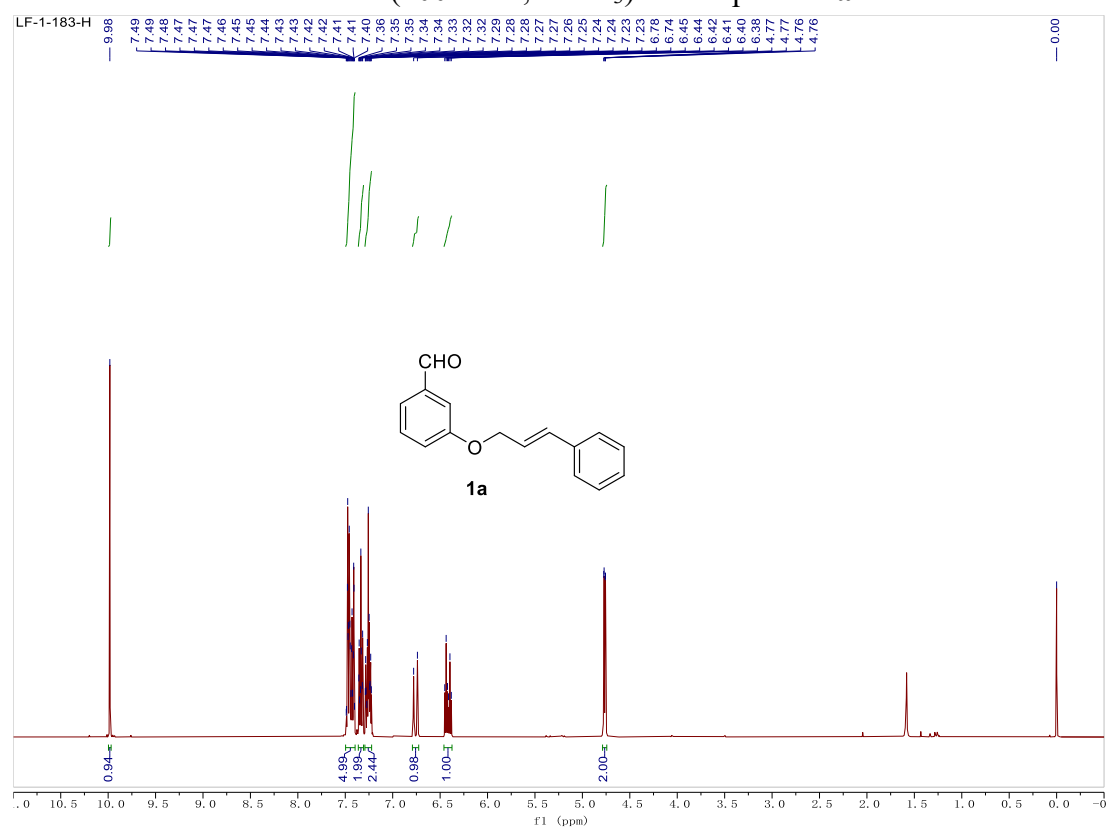

### $^{13}\text{C}$ NMR (101 MHz, $\text{CDCl}_3$ ) of compound **1a**

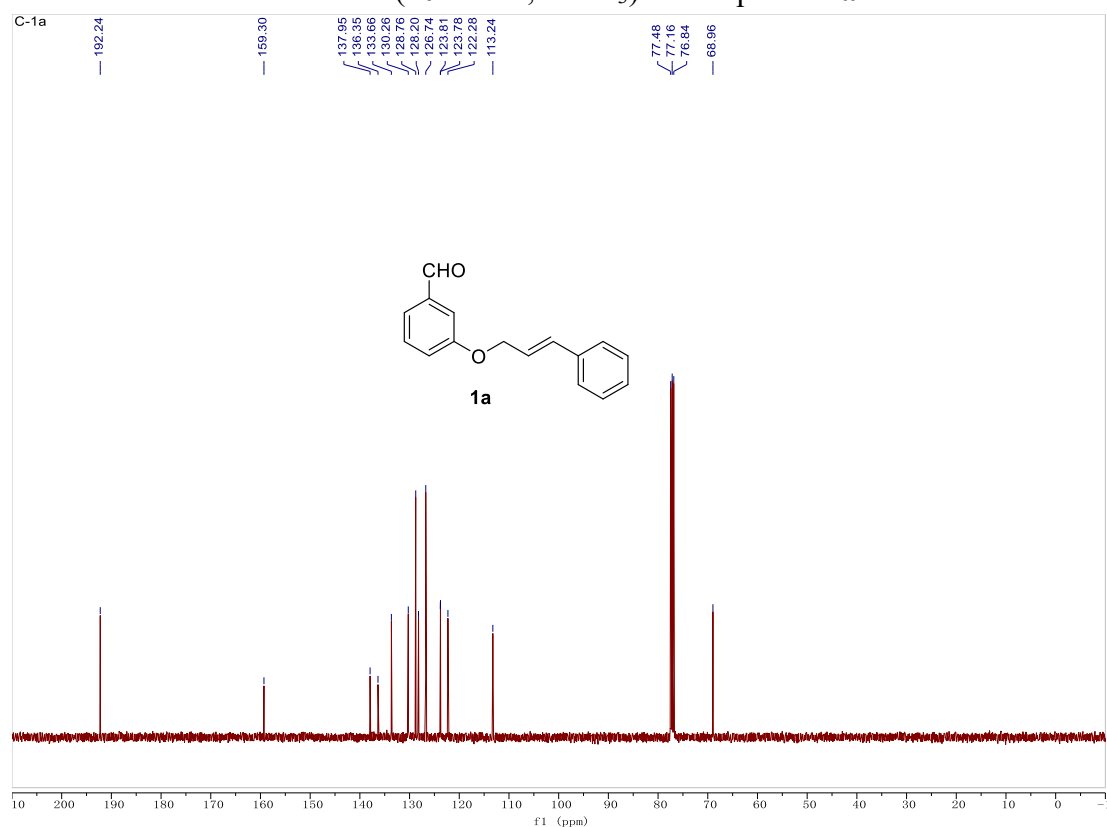

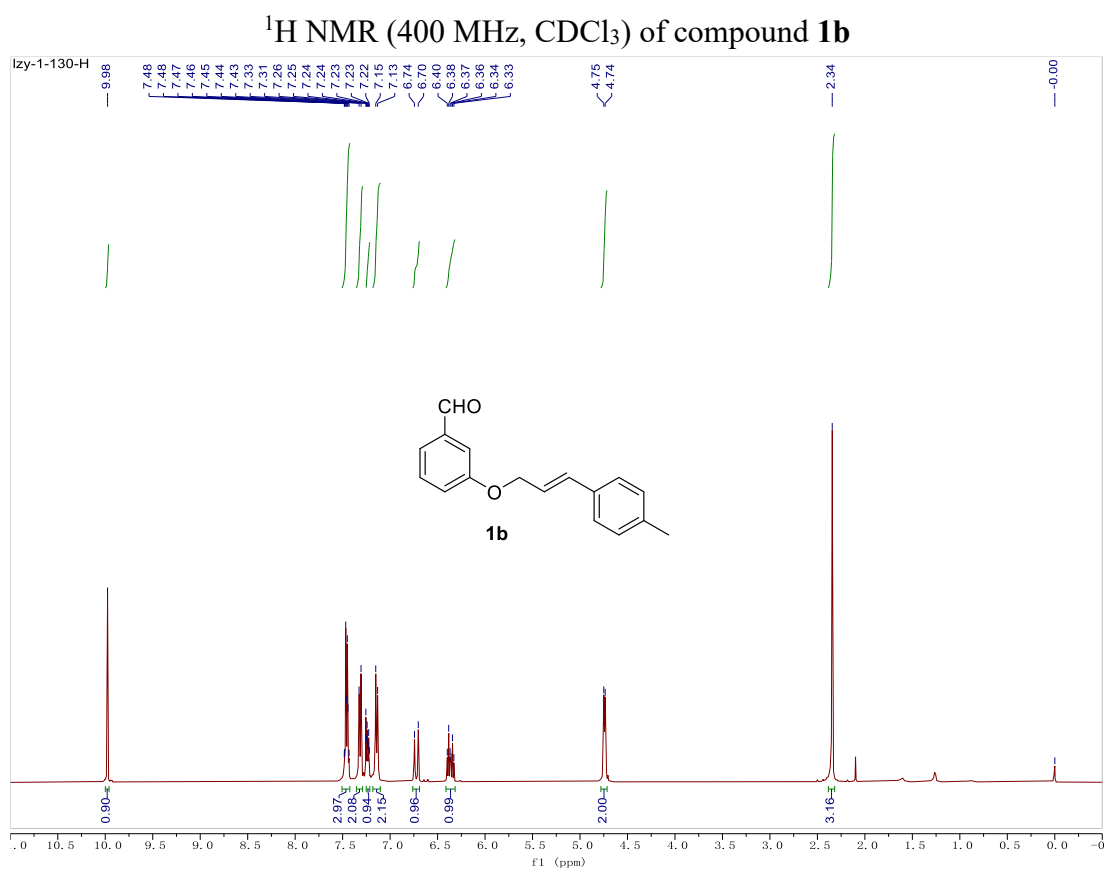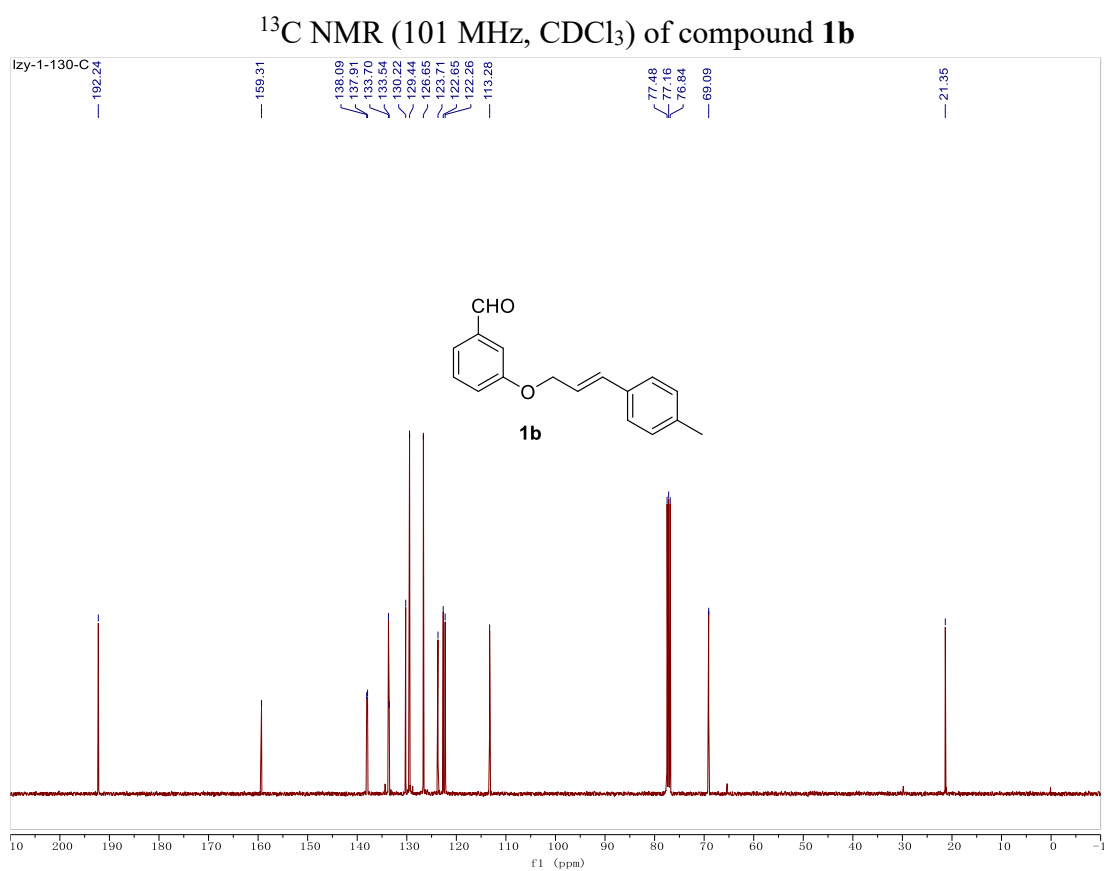

<sup>1</sup>H NMR (400 MHz, CDCl<sub>3</sub>) of compound **1c**

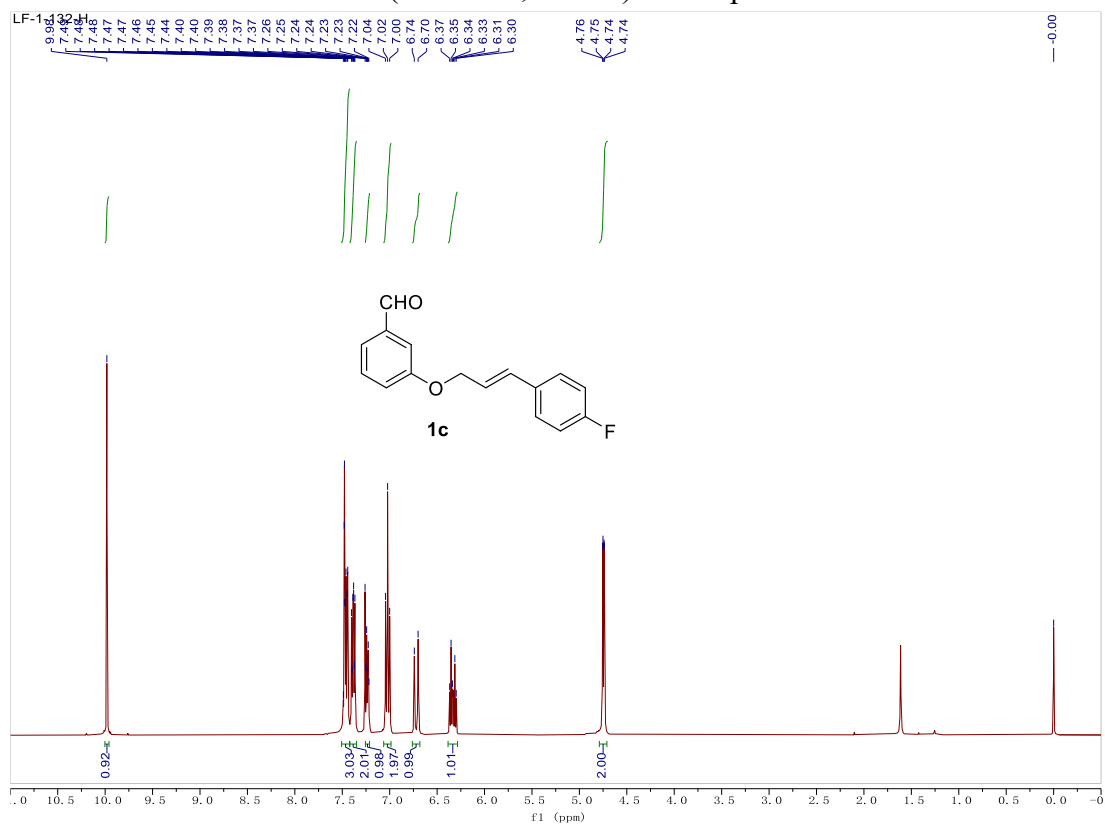

<sup>13</sup>C NMR (101 MHz, CDCl<sub>3</sub>) of compound **1c**

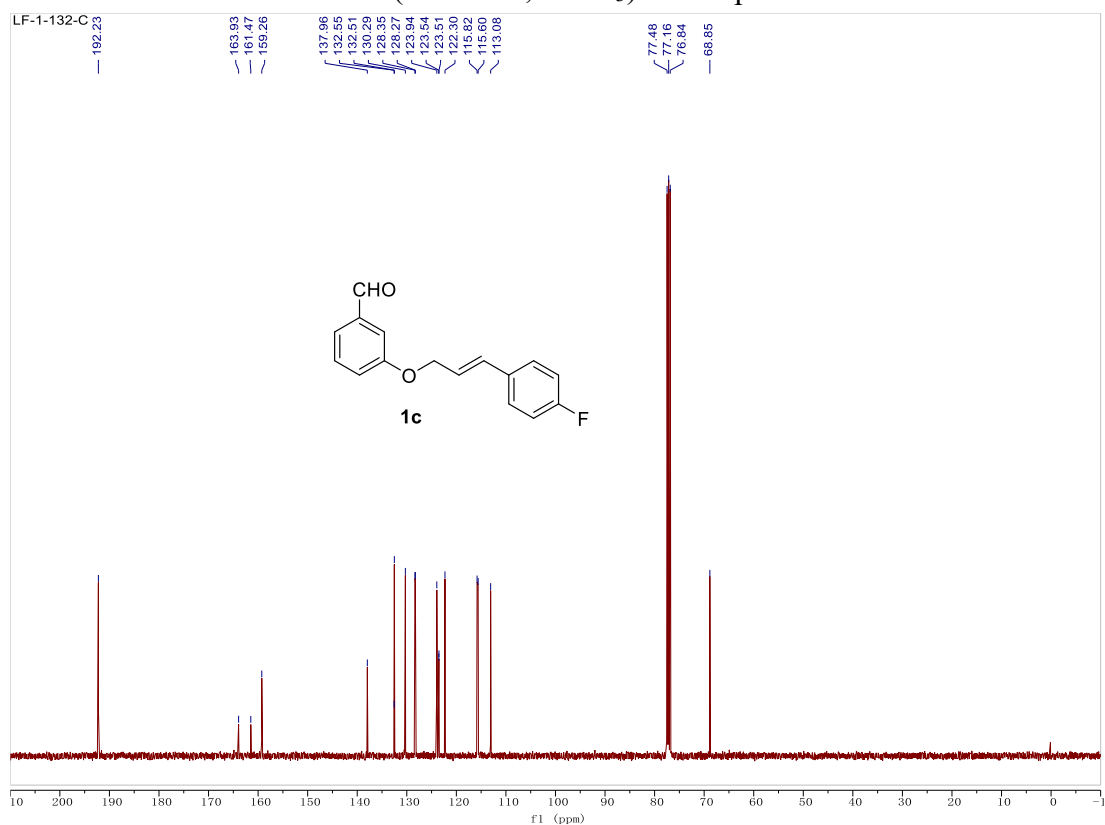

<sup>1</sup>H NMR (400 MHz, CDCl<sub>3</sub>) of compound **1d**

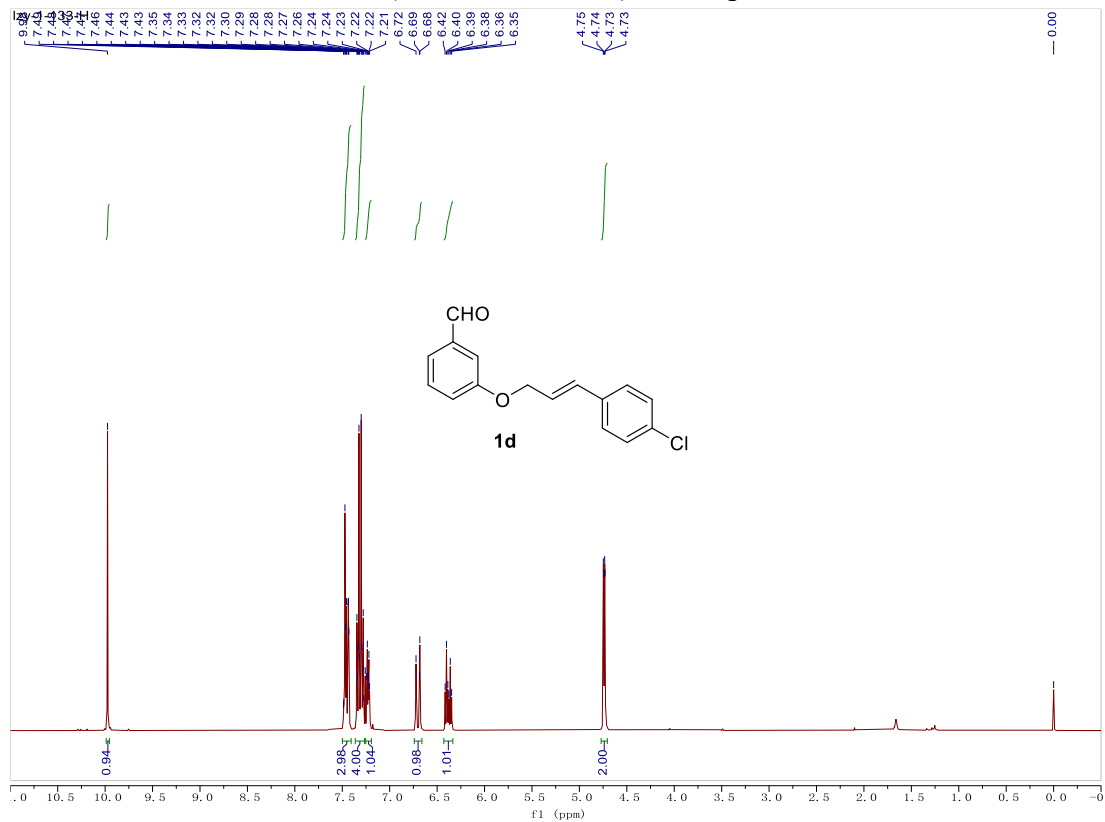

<sup>13</sup>C NMR (101 MHz, CDCl<sub>3</sub>) of compound **1d**

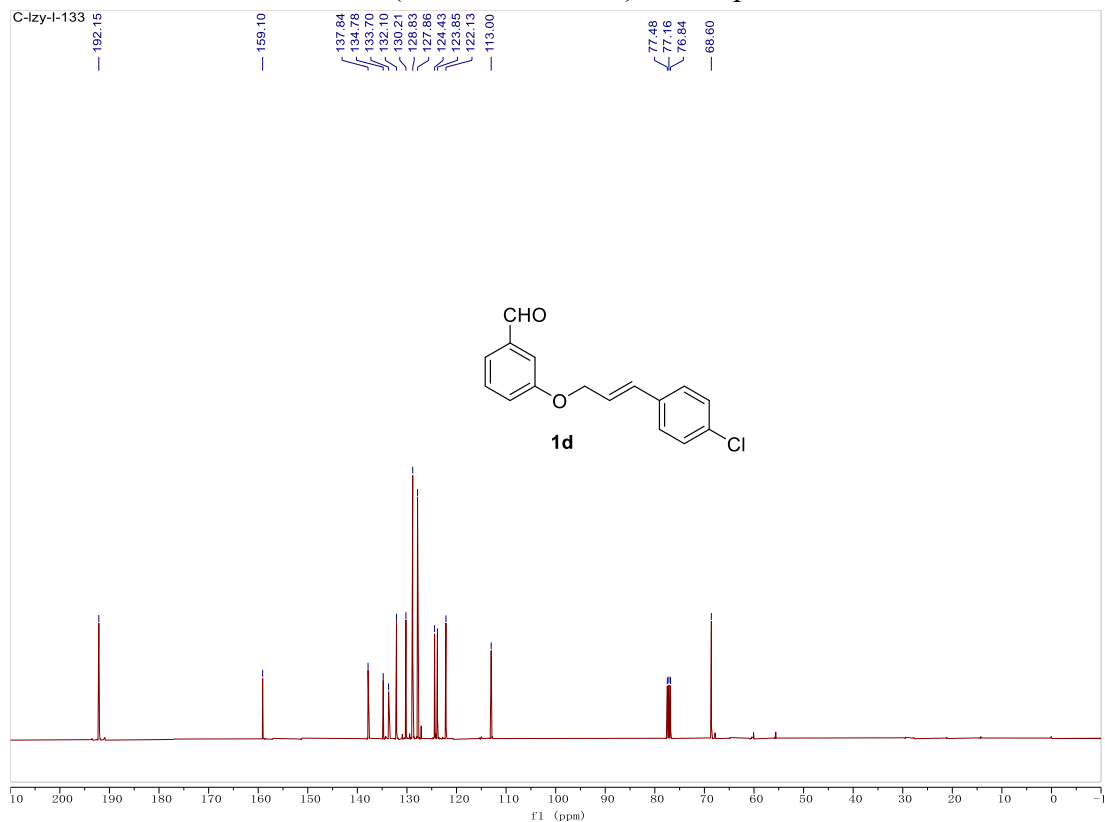

<sup>1</sup>H NMR (400 MHz, CDCl<sub>3</sub>) of compound **1e**

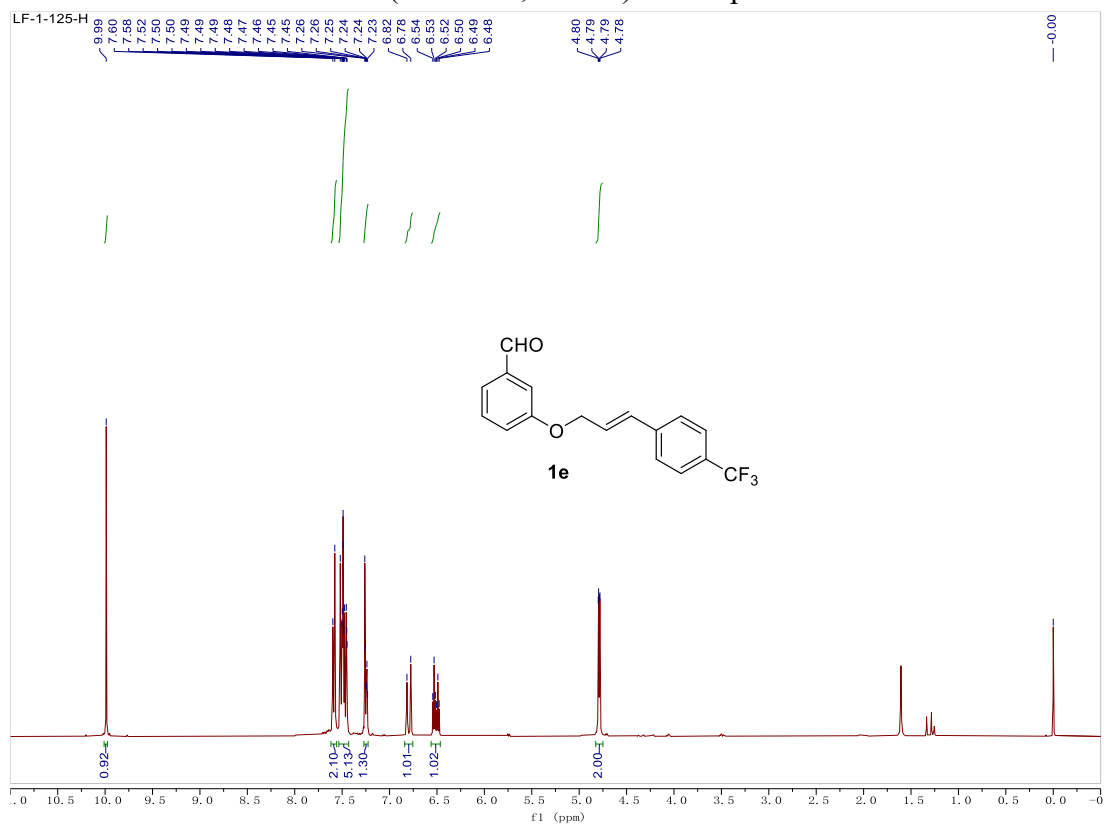

<sup>13</sup>C NMR (101 MHz, CDCl<sub>3</sub>) of compound **1e**

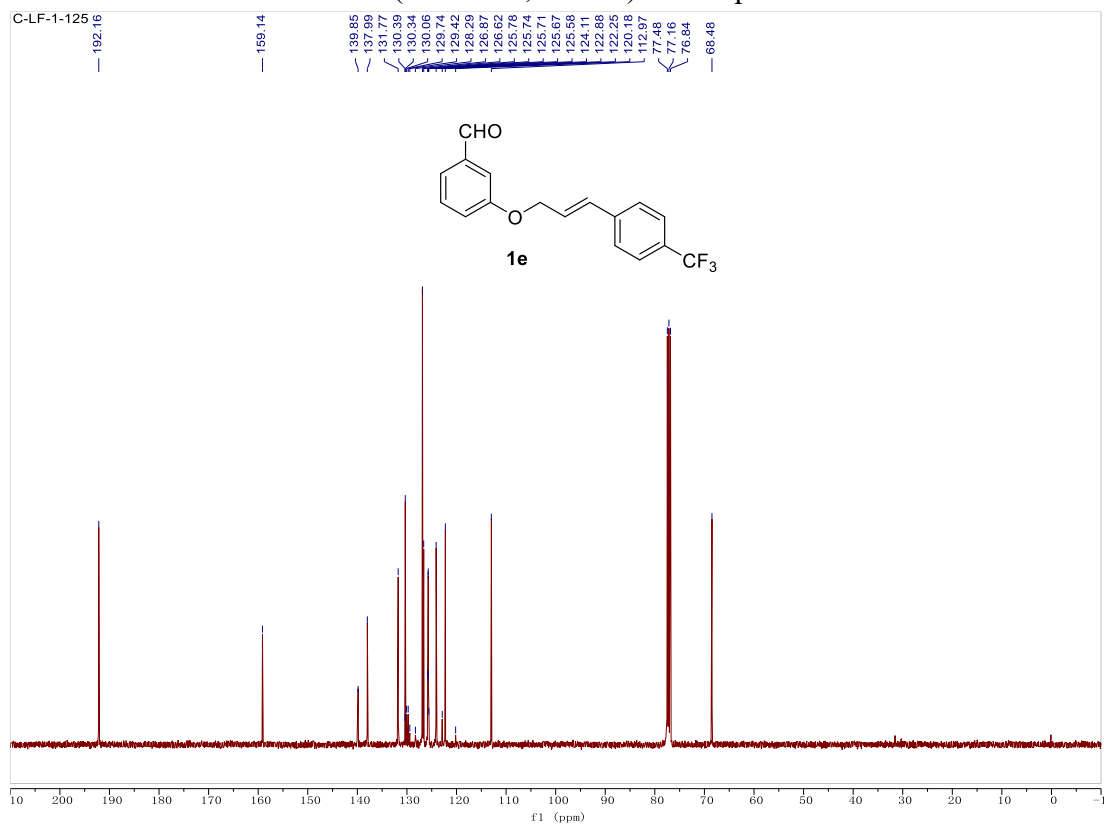

<sup>1</sup>H NMR (400 MHz, CDCl<sub>3</sub>) of compound **1f**

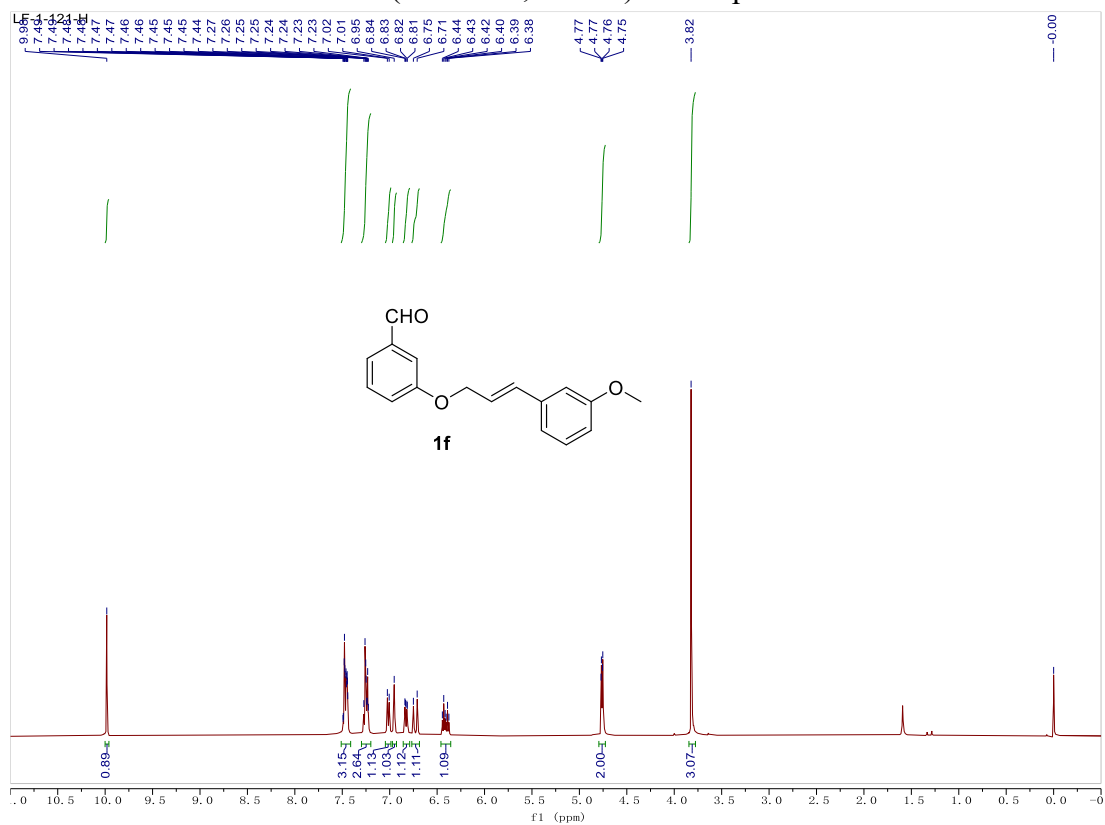

<sup>13</sup>C NMR (101 MHz, CDCl<sub>3</sub>) of compound **1f**

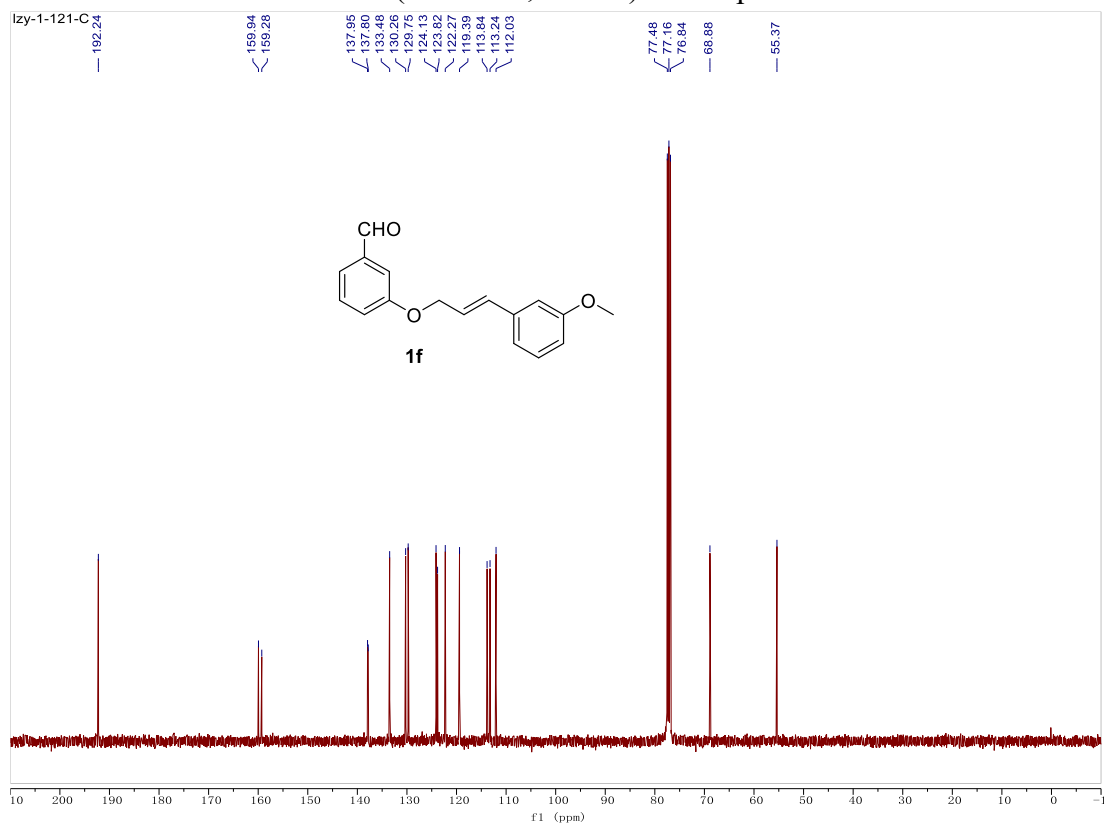

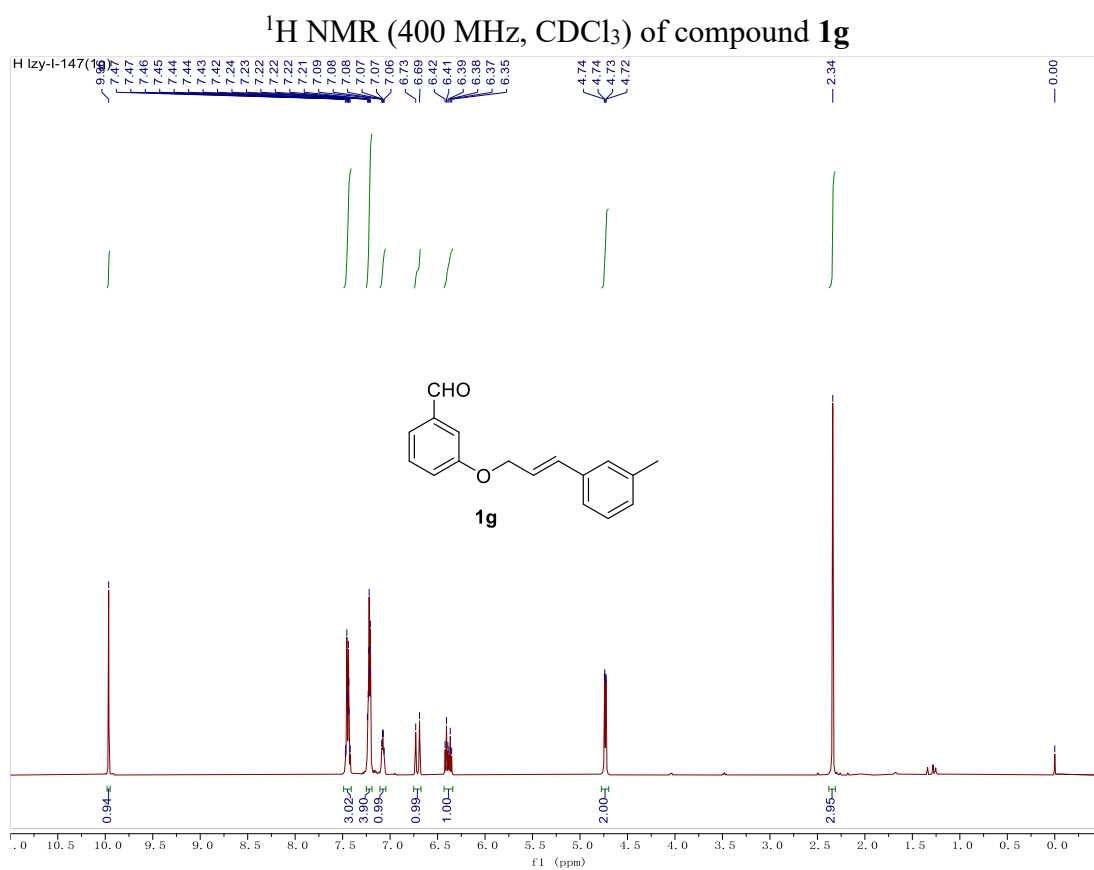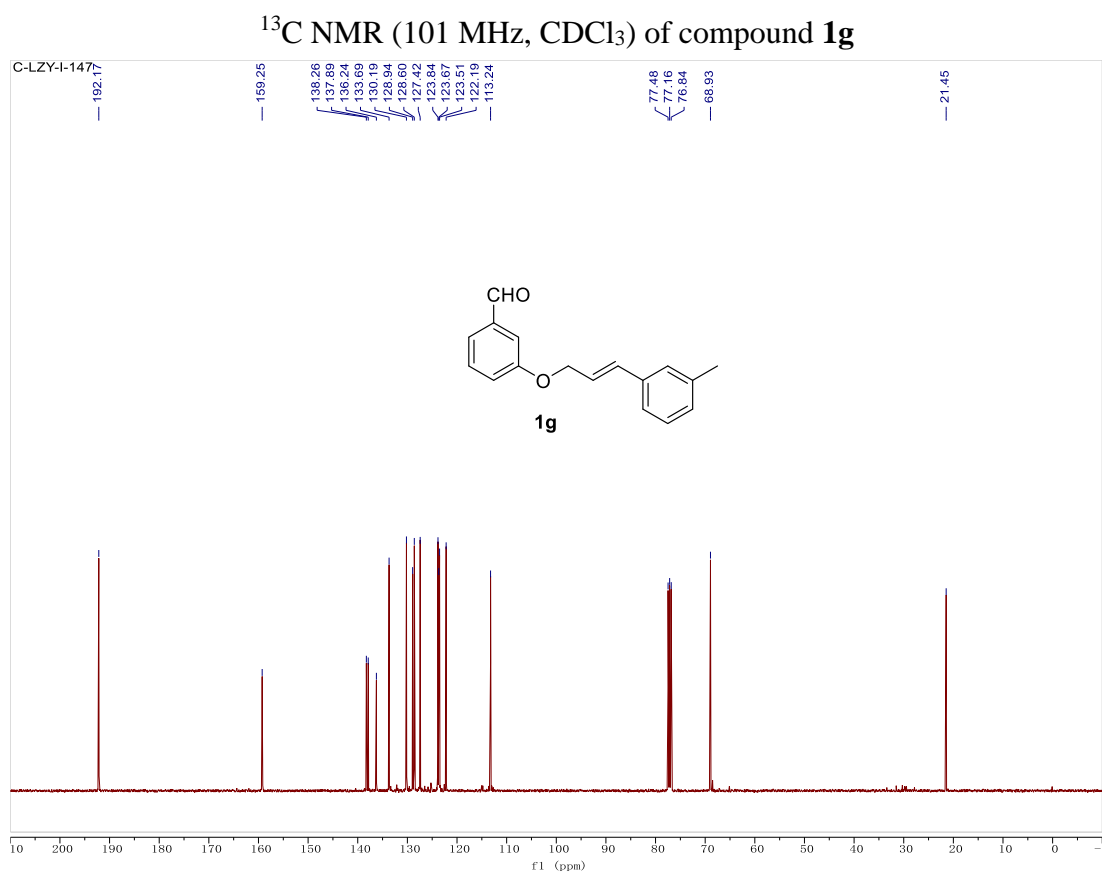

<sup>1</sup>H NMR (400 MHz, CDCl<sub>3</sub>) of compound **1h**

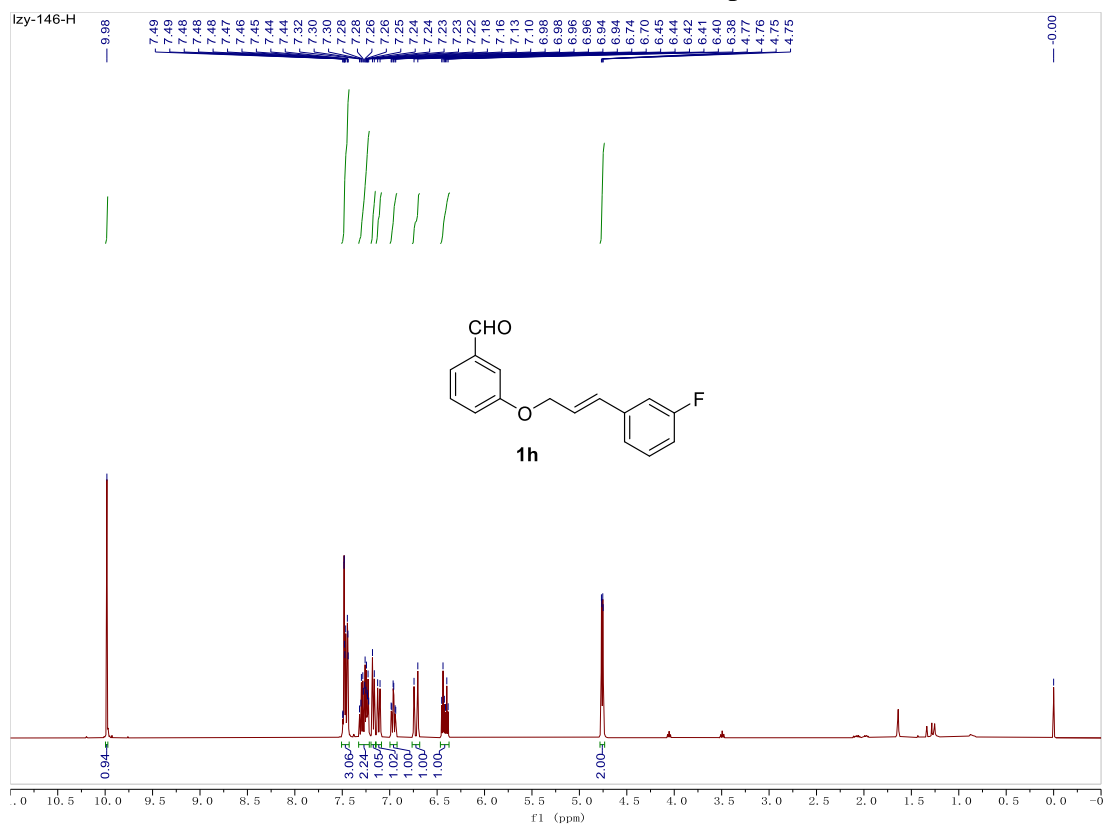

<sup>13</sup>C NMR (101 MHz, CDCl<sub>3</sub>) of compound **1h**

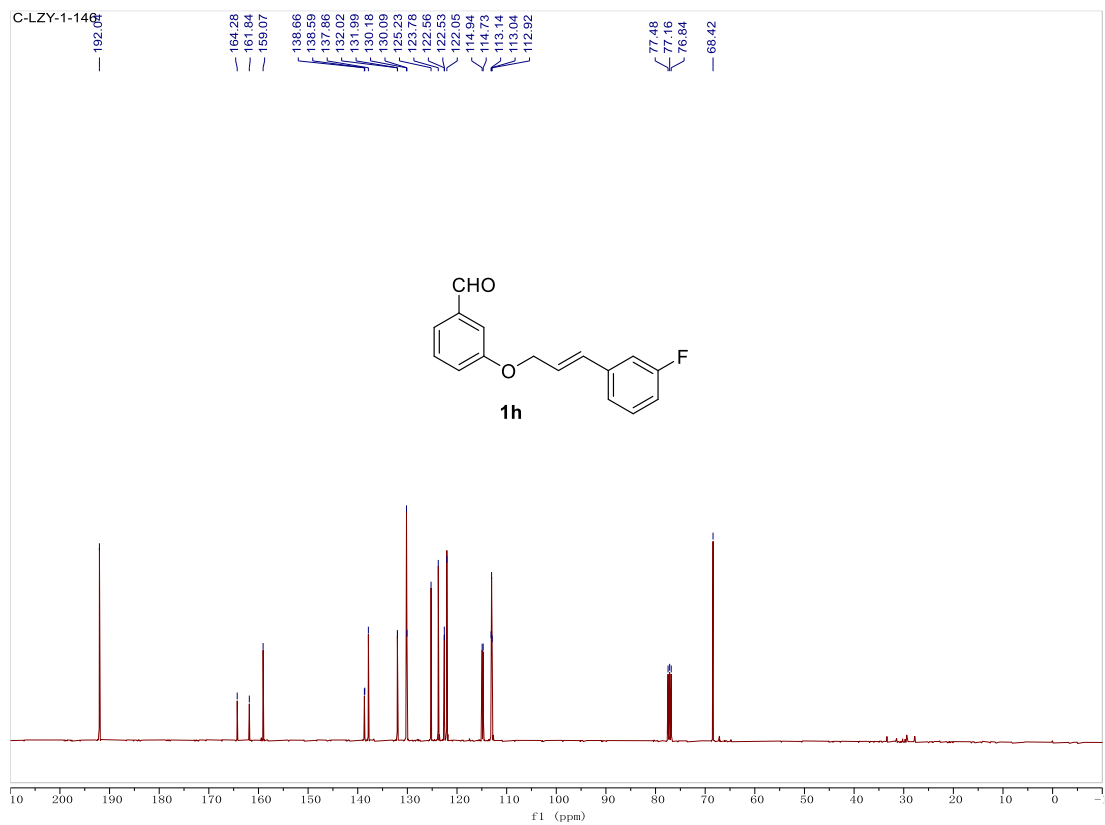

<sup>1</sup>H NMR (400 MHz, CDCl<sub>3</sub>) of compound **1i**

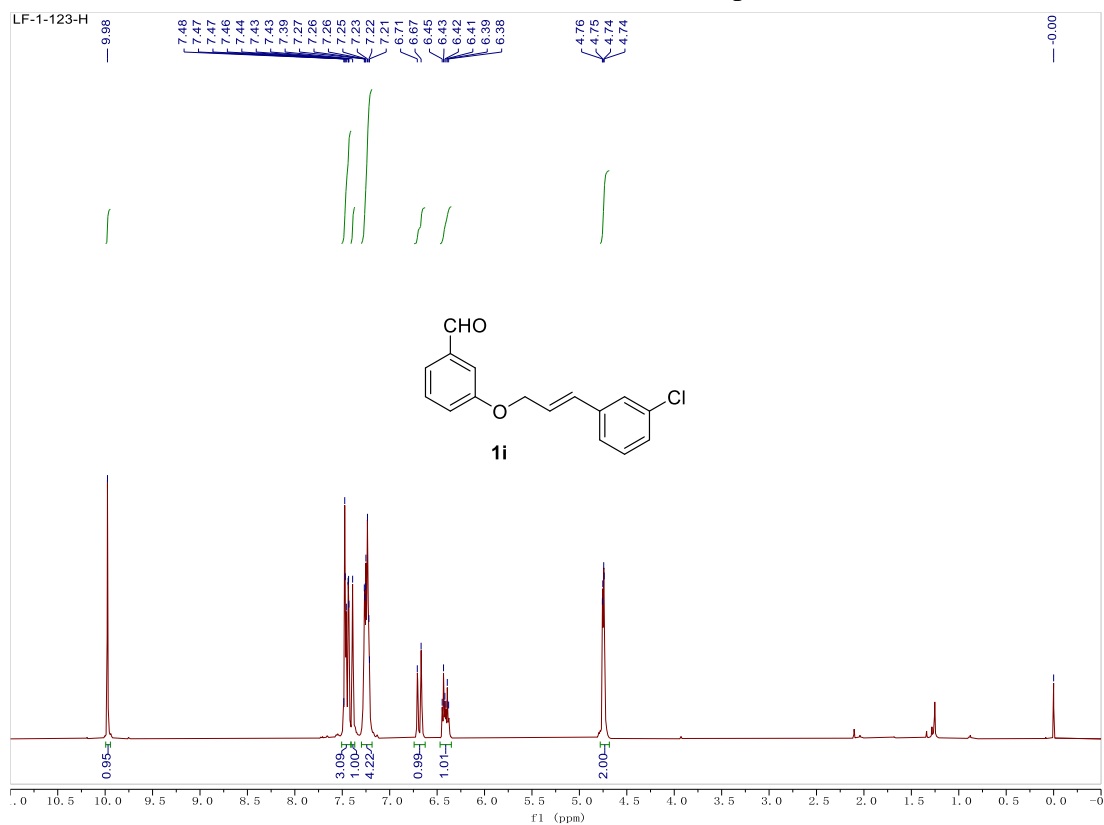

<sup>13</sup>C NMR (101 MHz, CDCl<sub>3</sub>) of compound **1i**

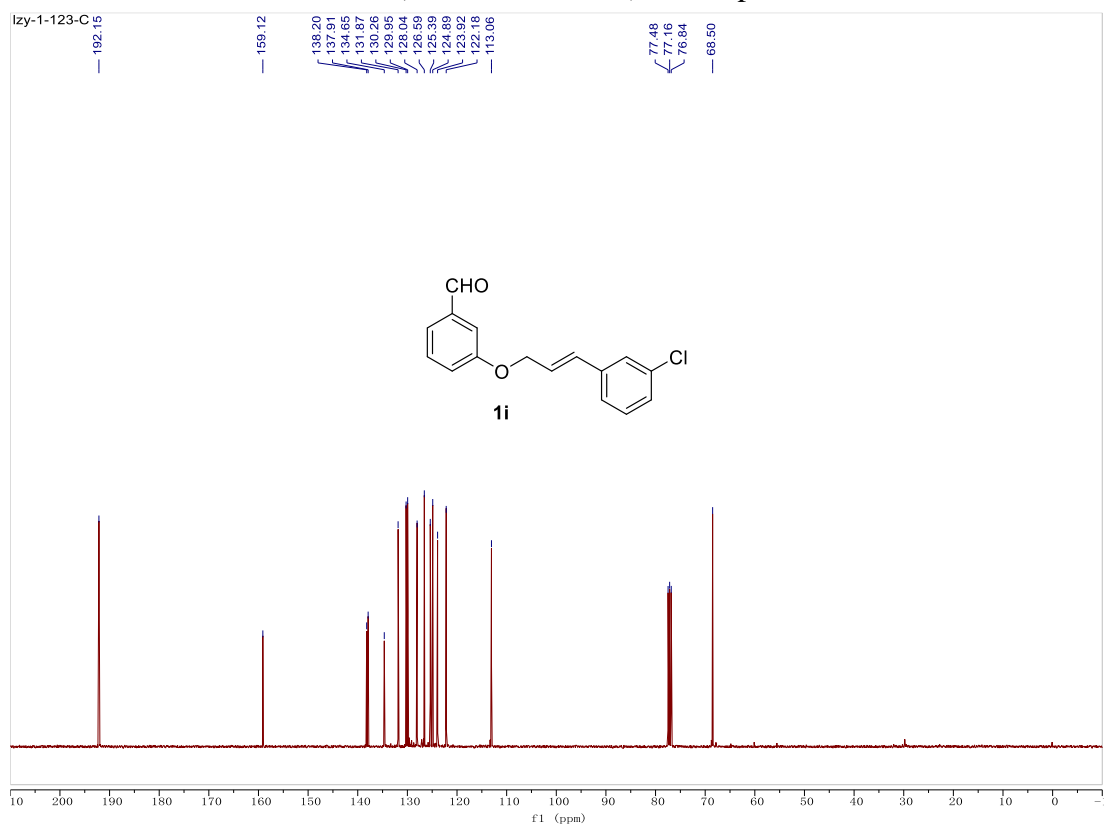

<sup>1</sup>H NMR (400 MHz, CDCl<sub>3</sub>) of compound **1j**

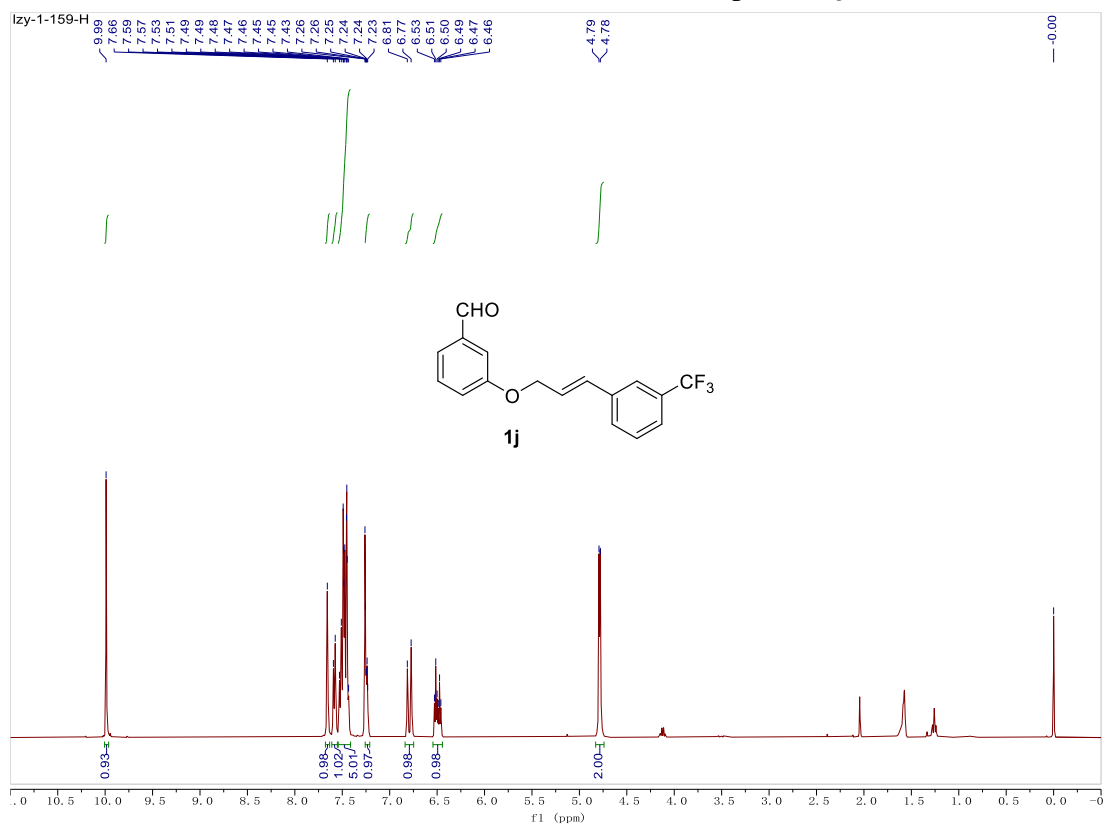

<sup>13</sup>C NMR (101 MHz, CDCl<sub>3</sub>) of compound **1j**

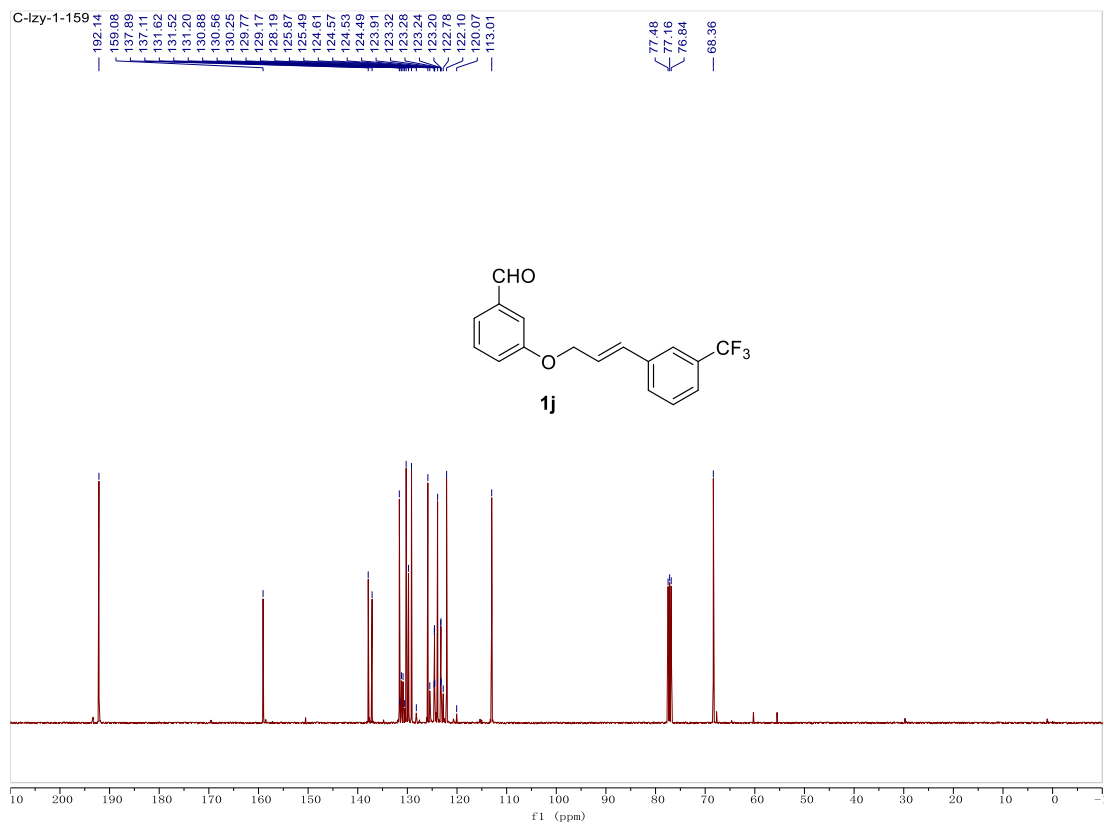

<sup>1</sup>H NMR (400 MHz, CDCl<sub>3</sub>) of compound **1k**

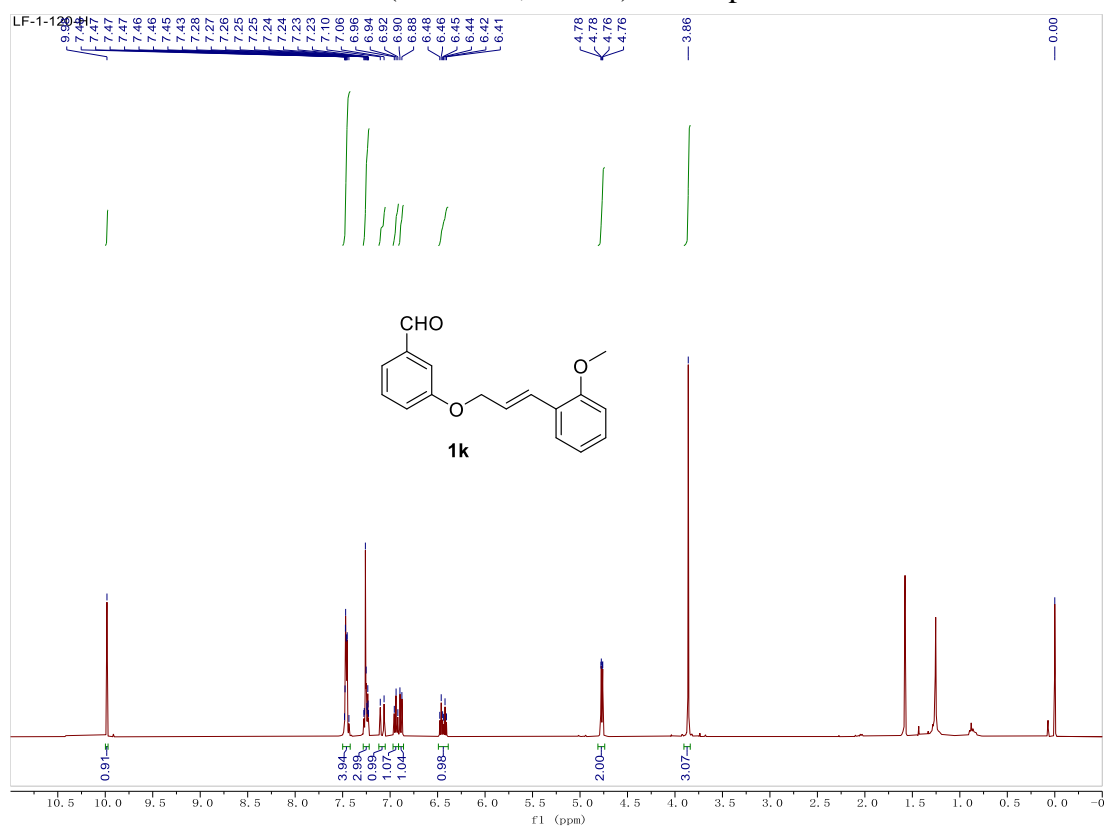

<sup>13</sup>C NMR (101 MHz, CDCl<sub>3</sub>) of compound **1k**

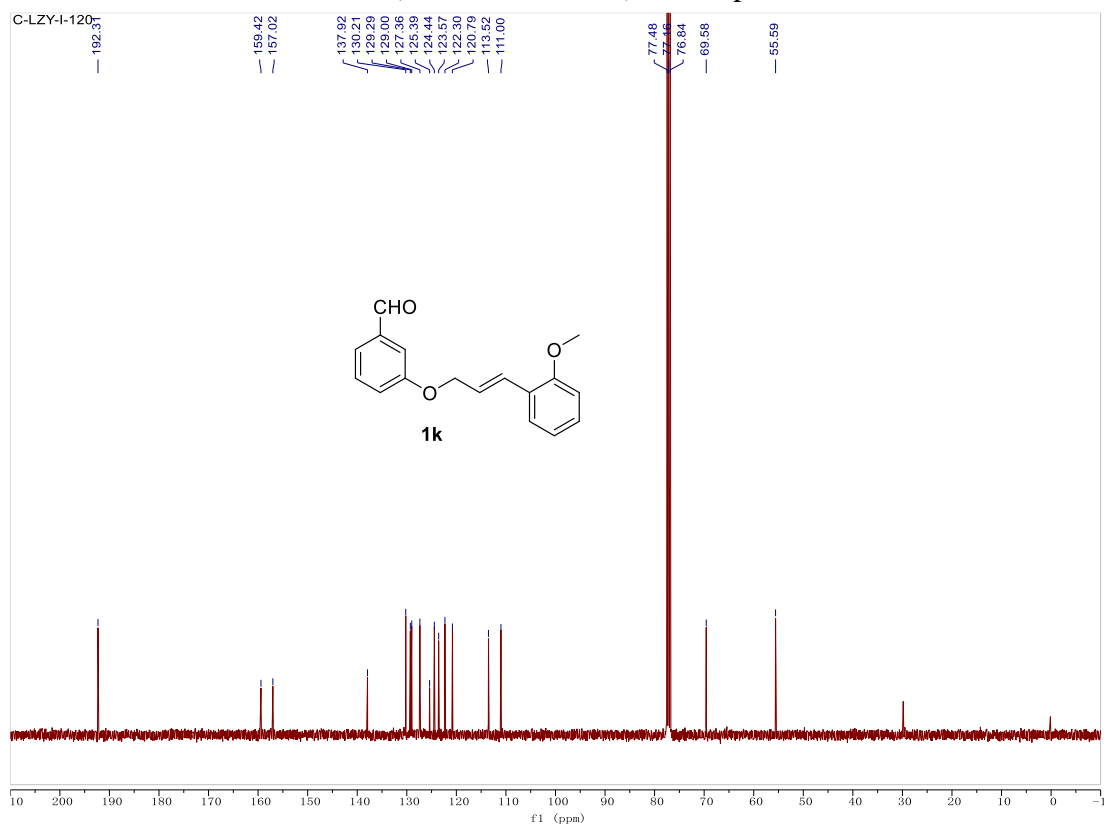

<sup>1</sup>H NMR (400 MHz, CDCl<sub>3</sub>) of compound **11**

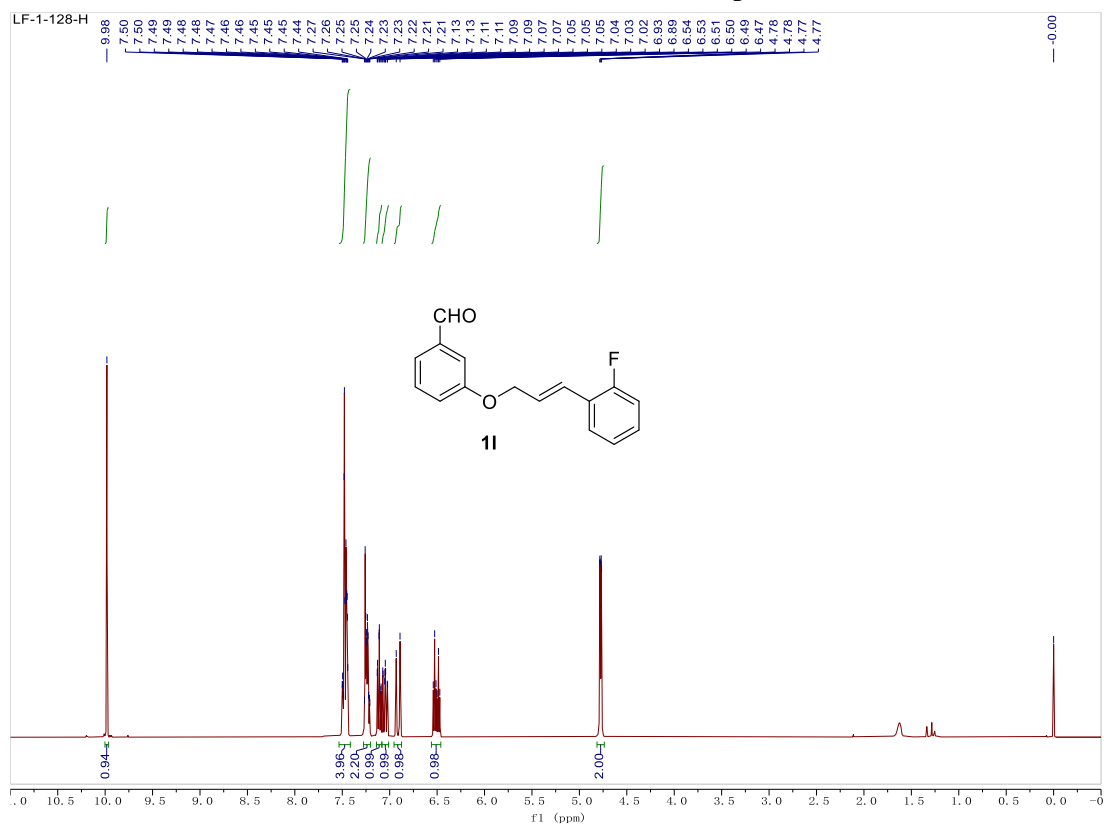

<sup>13</sup>C NMR (101 MHz, CDCl<sub>3</sub>) of compound **11**

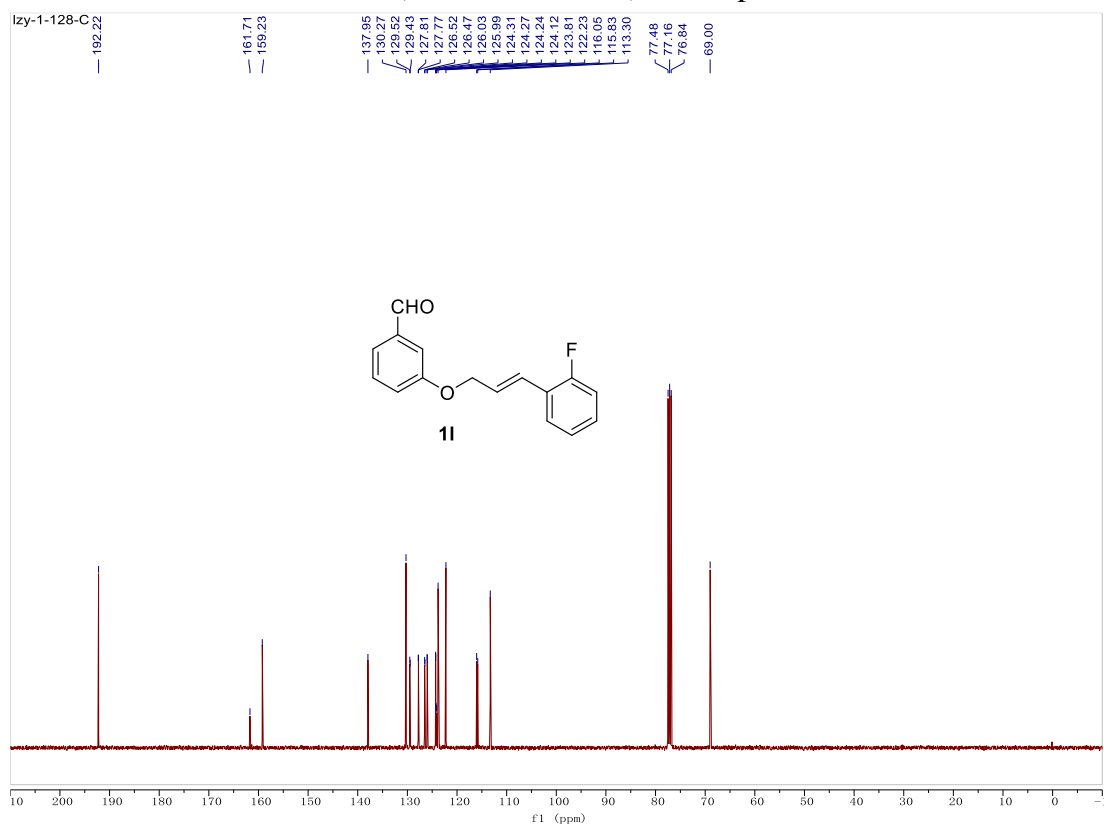

$^1\text{H}$  NMR (400 MHz,  $\text{CDCl}_3$ ) of compound **1m**

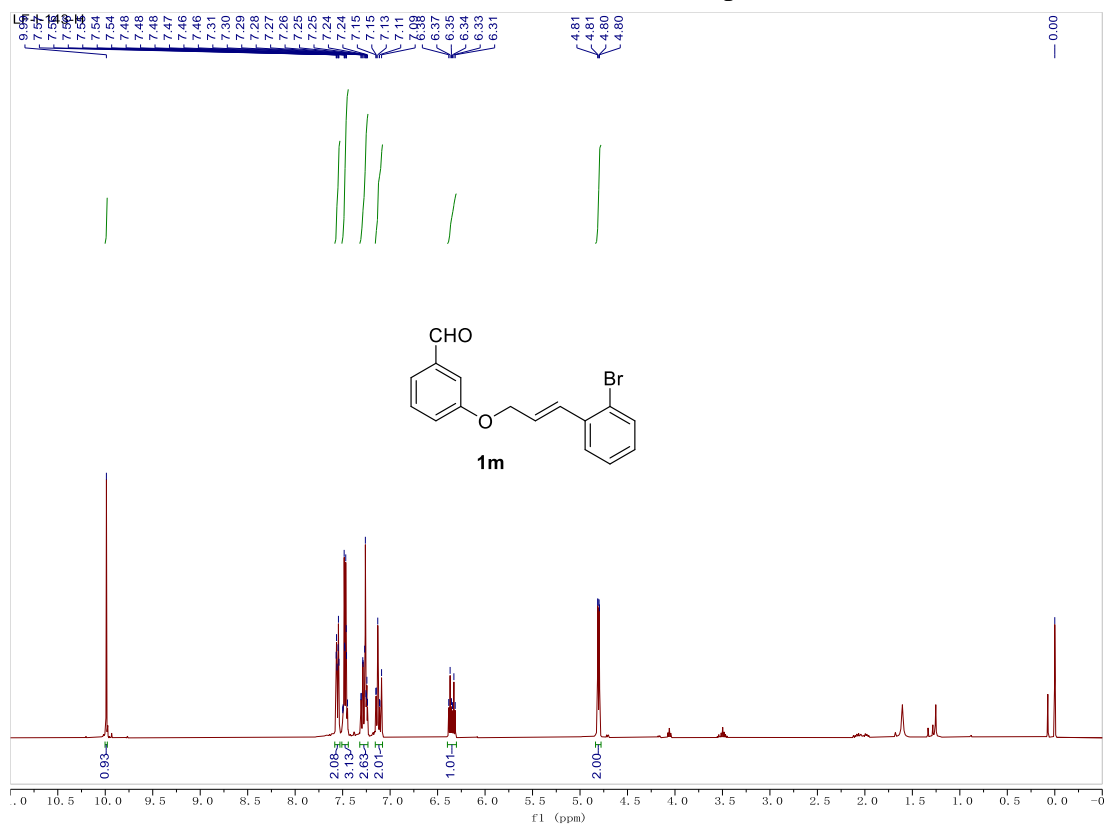

$^{13}\text{C}$  NMR (101 MHz,  $\text{CDCl}_3$ ) of compound **1m**

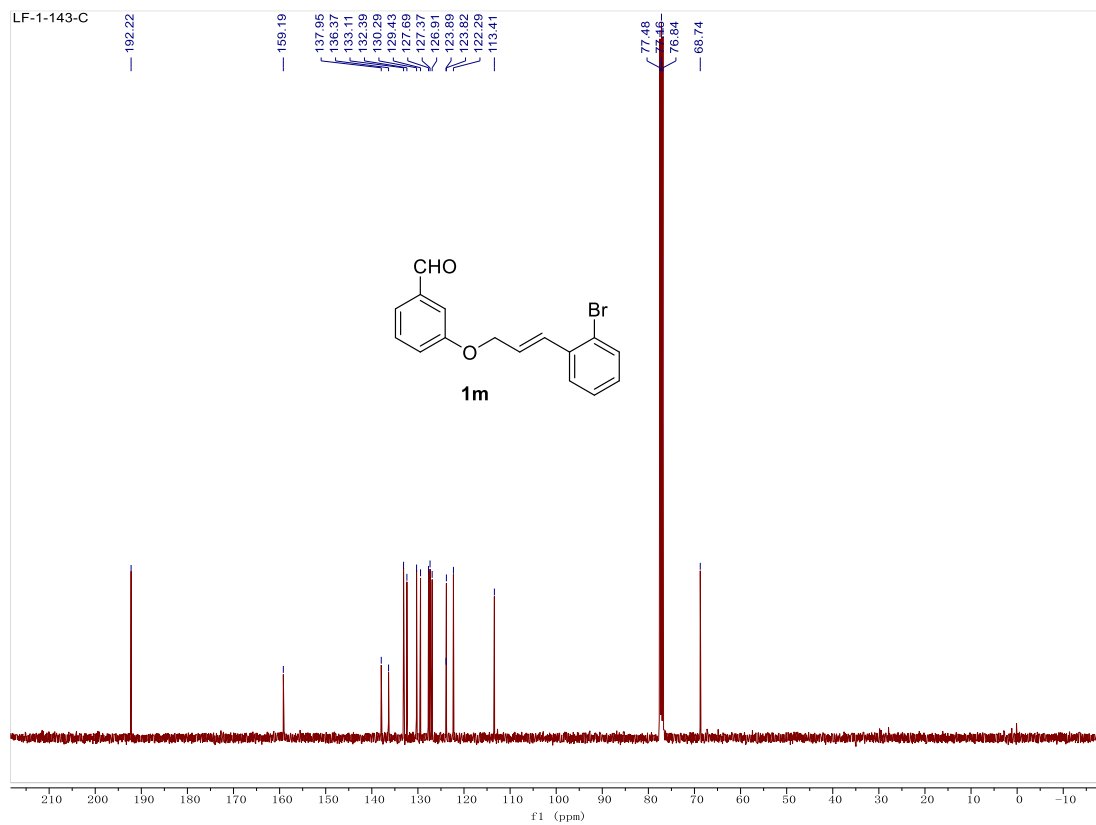

<sup>1</sup>H NMR (400 MHz, CDCl<sub>3</sub>) of compound **1n**

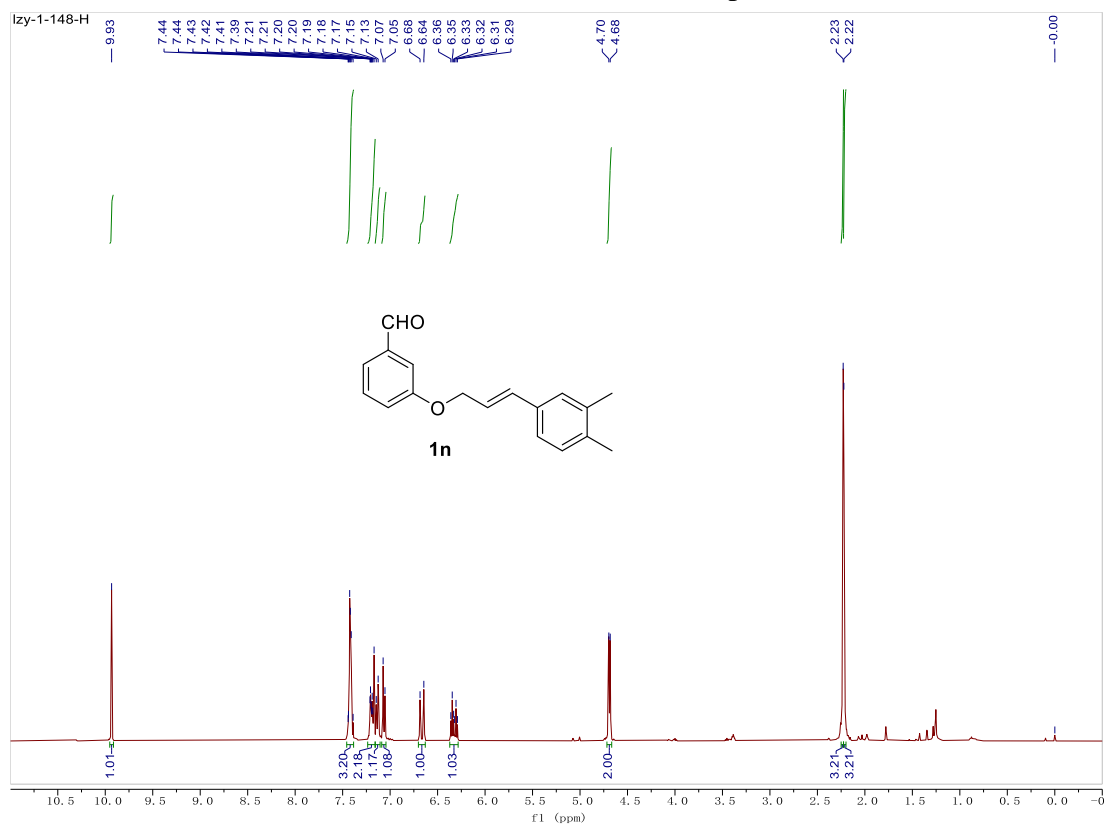

<sup>13</sup>C NMR (101 MHz, CDCl<sub>3</sub>) of compound **1n**

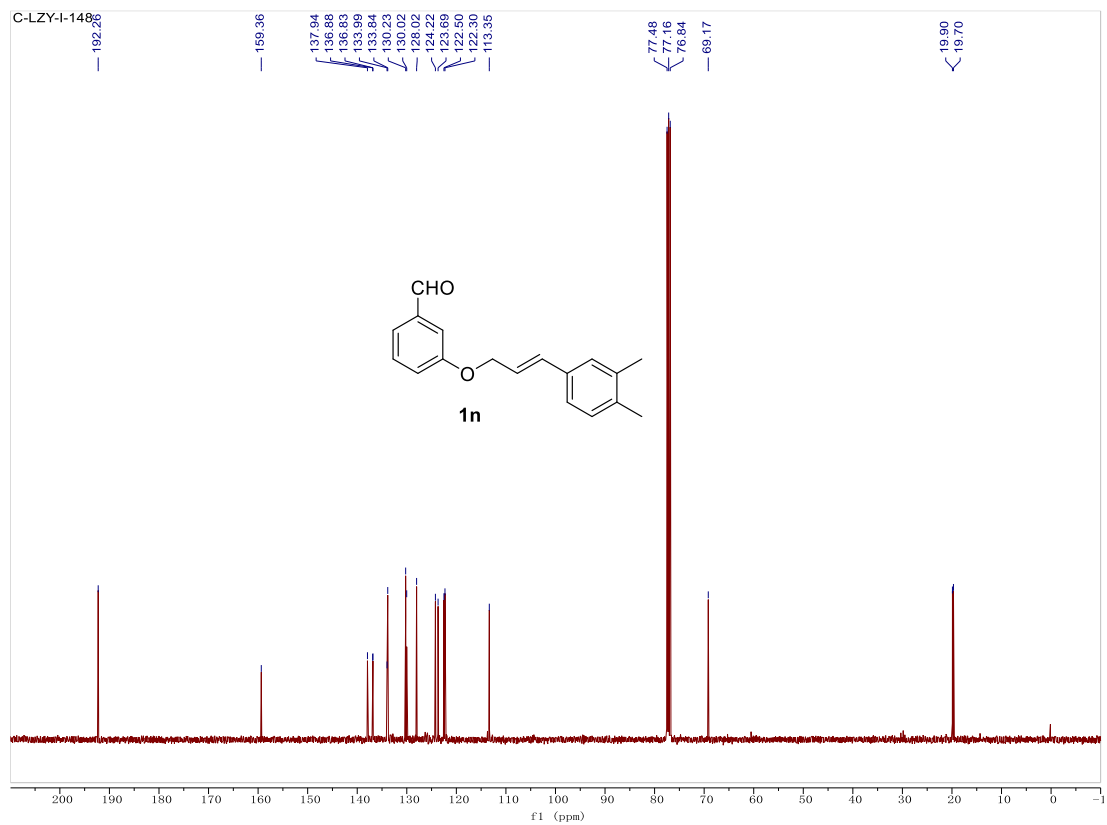

<sup>1</sup>H NMR (400 MHz, CDCl<sub>3</sub>) of compound **1o**

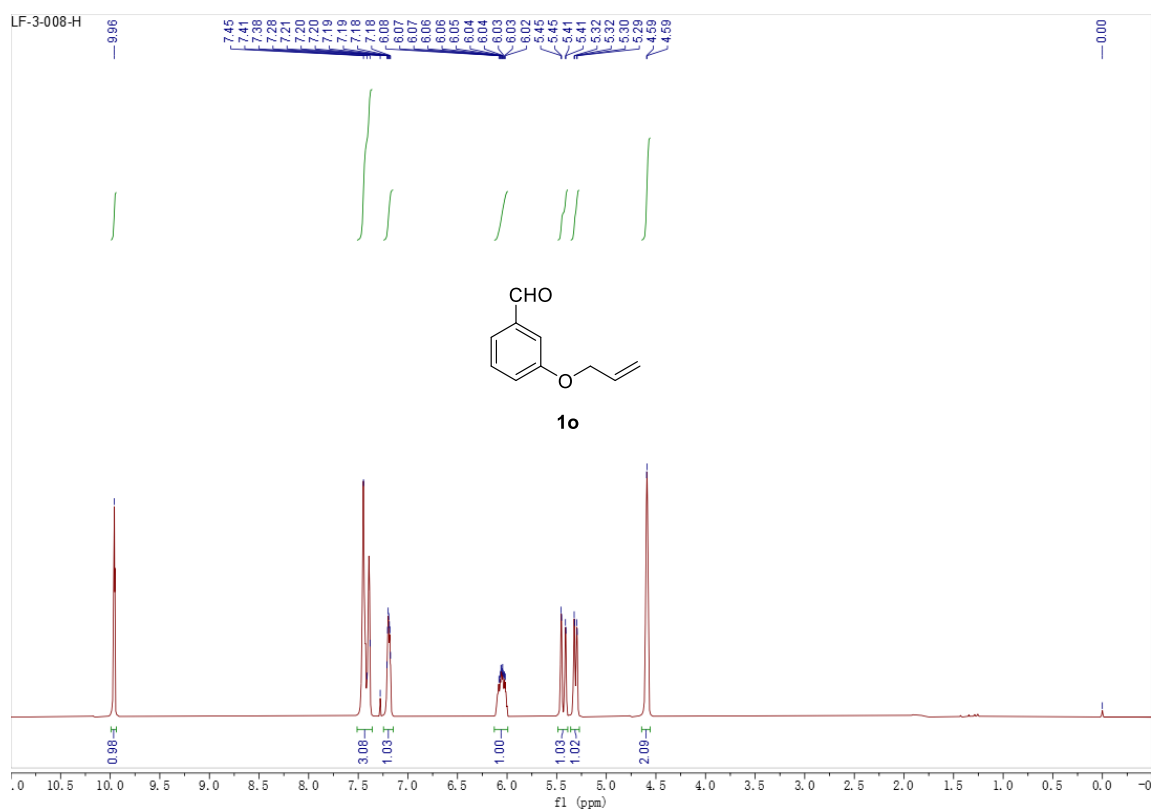

<sup>13</sup>C NMR (101 MHz, CDCl<sub>3</sub>) of compound **1o**

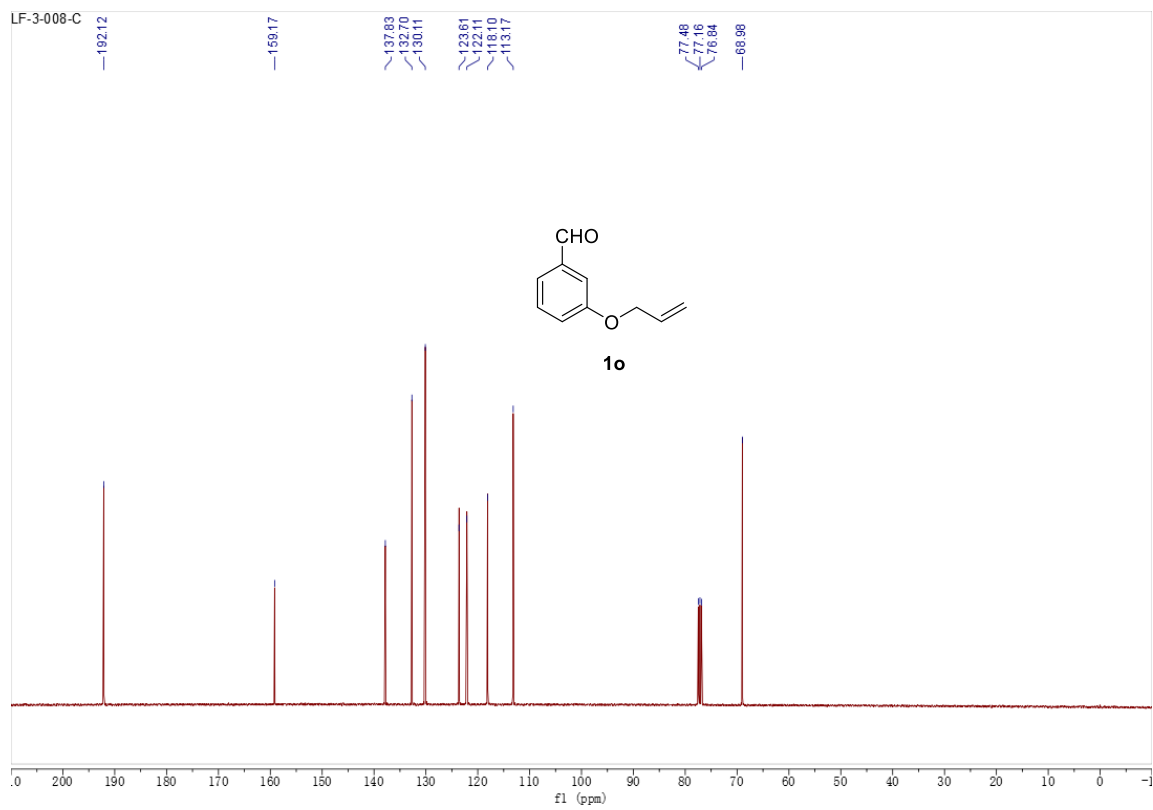

<sup>1</sup>H NMR (400 MHz, CDCl<sub>3</sub>) of compound **1p**

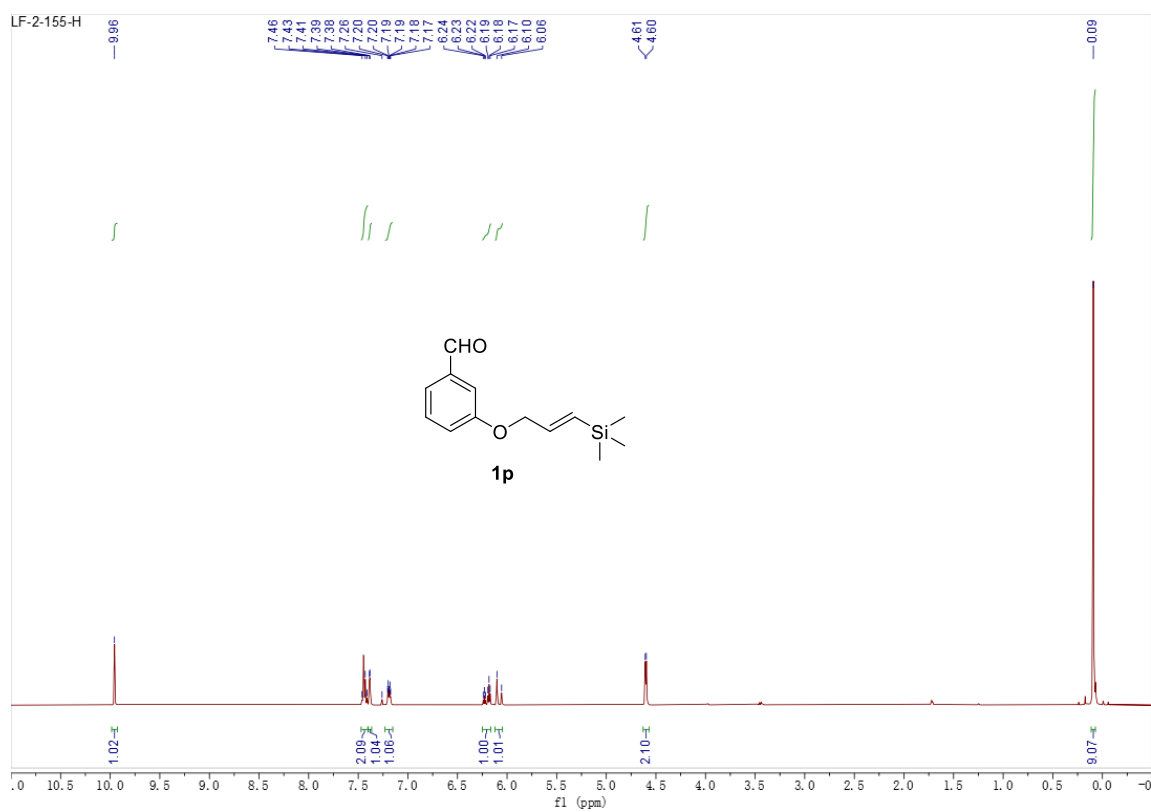

<sup>13</sup>C NMR (101 MHz, CDCl<sub>3</sub>) of compound **1p**

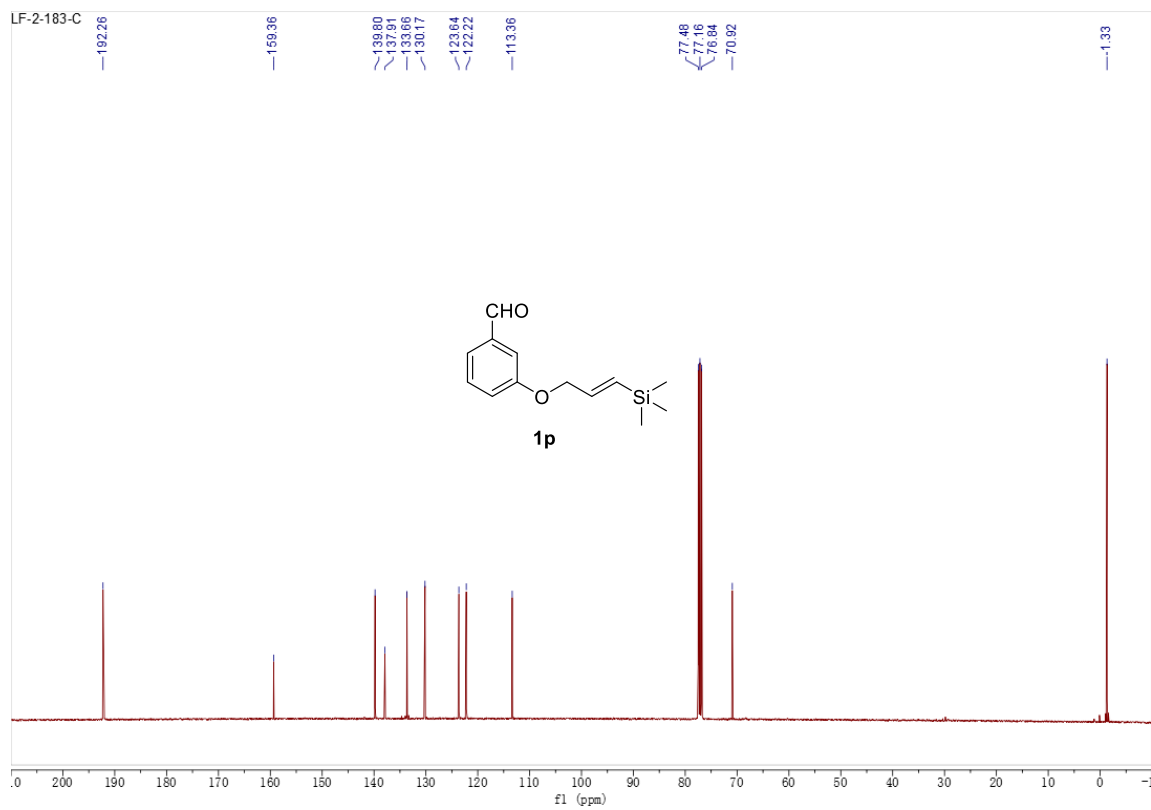

<sup>1</sup>H NMR (400 MHz, CDCl<sub>3</sub>) of compound **1q**

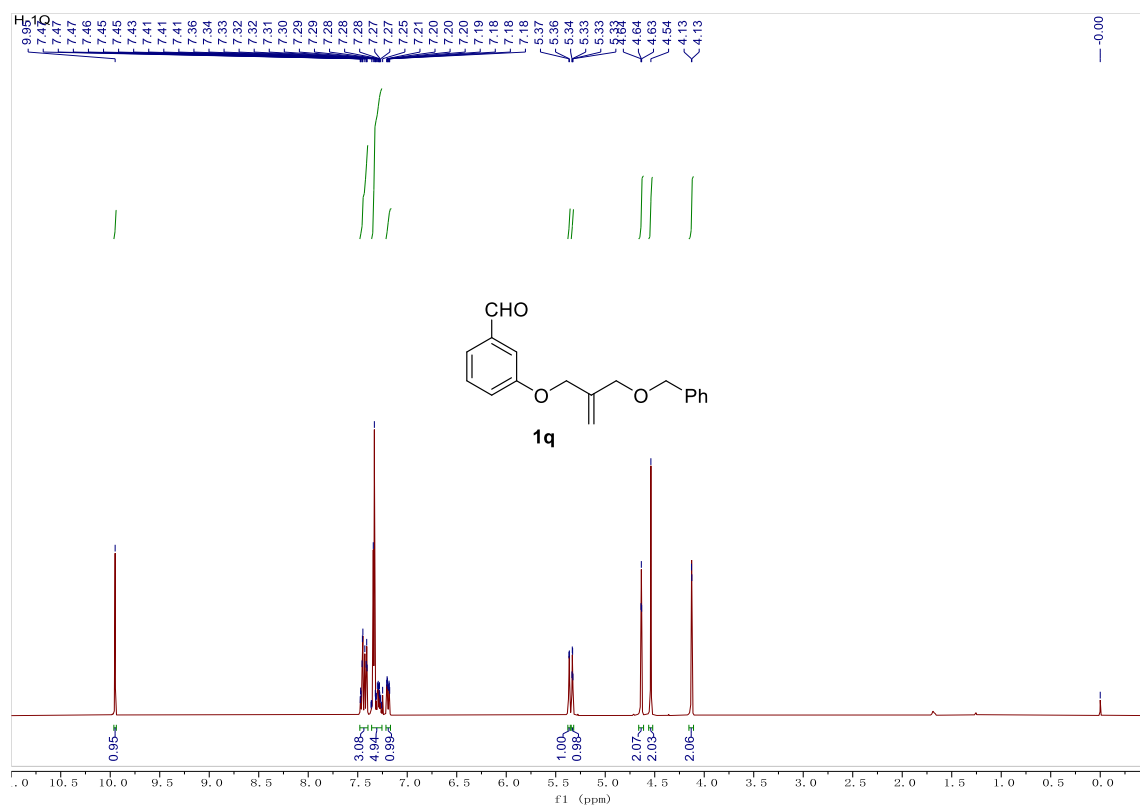

<sup>13</sup>C NMR (101 MHz, CDCl<sub>3</sub>) of compound **1q**

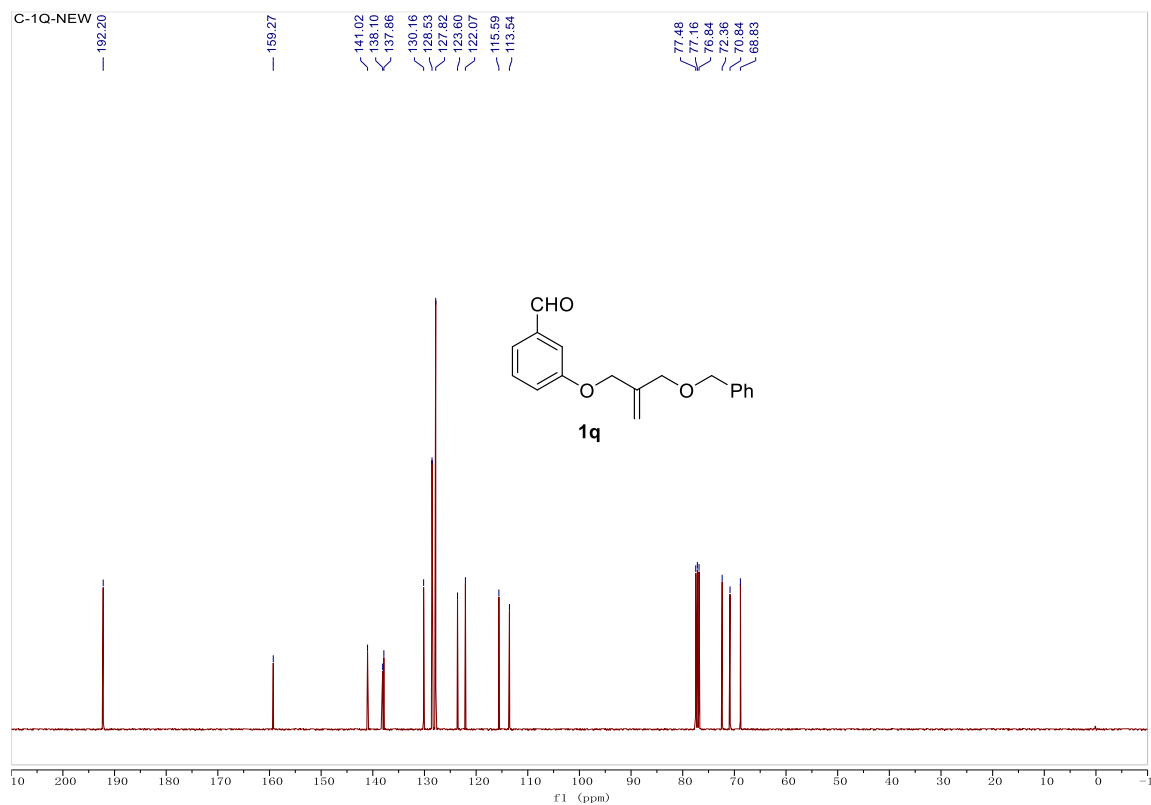

<sup>1</sup>H NMR (400 MHz, CDCl<sub>3</sub>) of compound **1r**

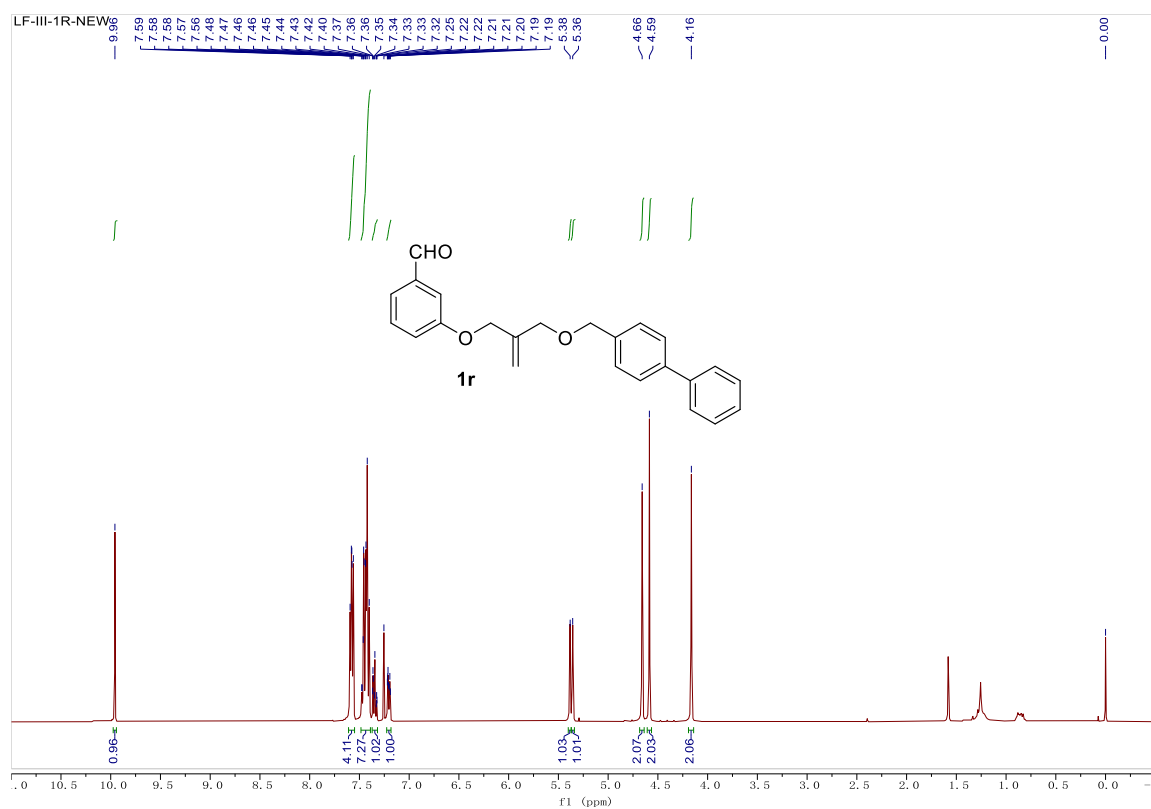

<sup>13</sup>C NMR (101 MHz, CDCl<sub>3</sub>) of compound **1r**

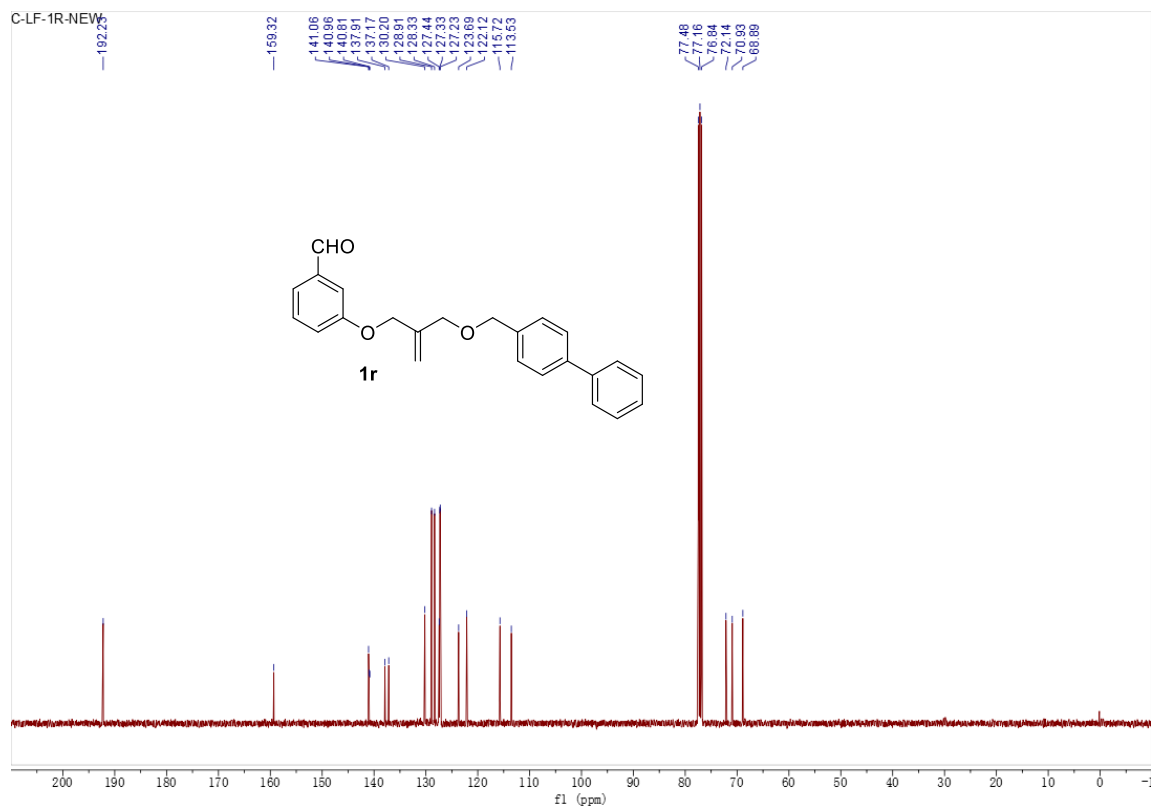

<sup>1</sup>H NMR (400 MHz, CDCl<sub>3</sub>) of compound **1s**

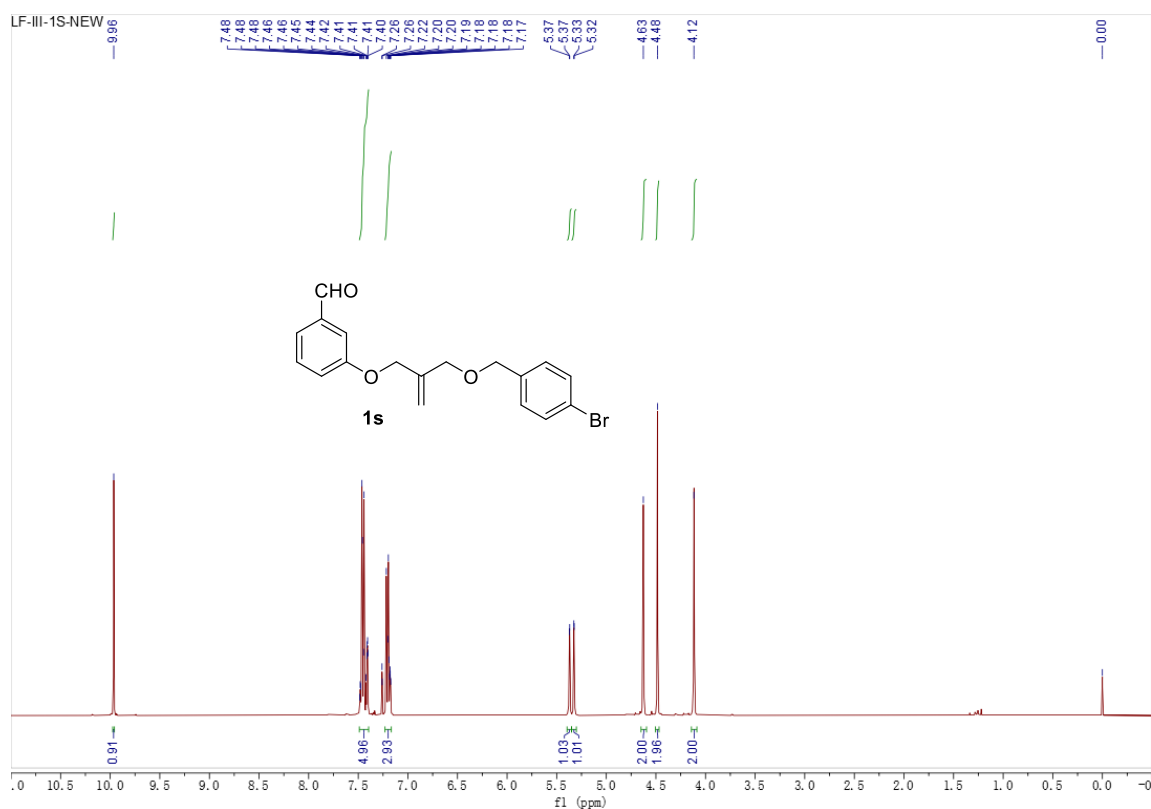

<sup>13</sup>C NMR (101 MHz, CDCl<sub>3</sub>) of compound **1s**

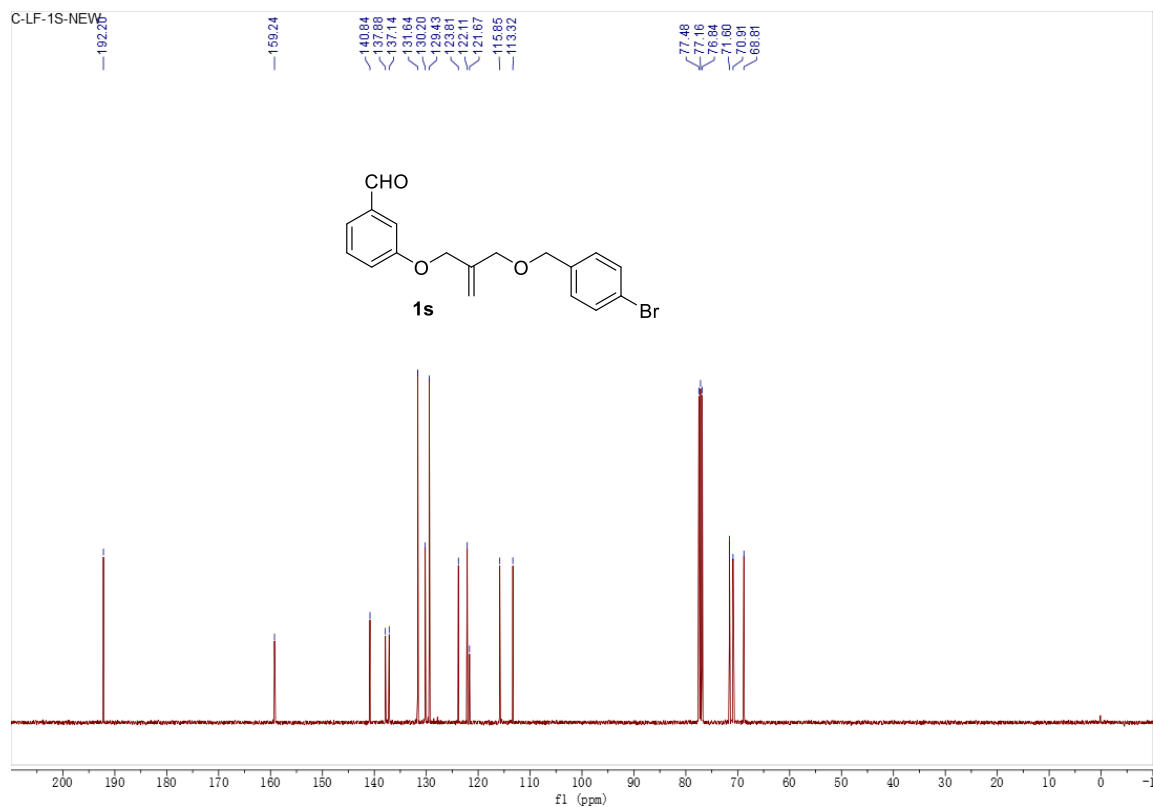

$^1\text{H}$  NMR (400 MHz,  $\text{CDCl}_3$ ) of compound **1t**

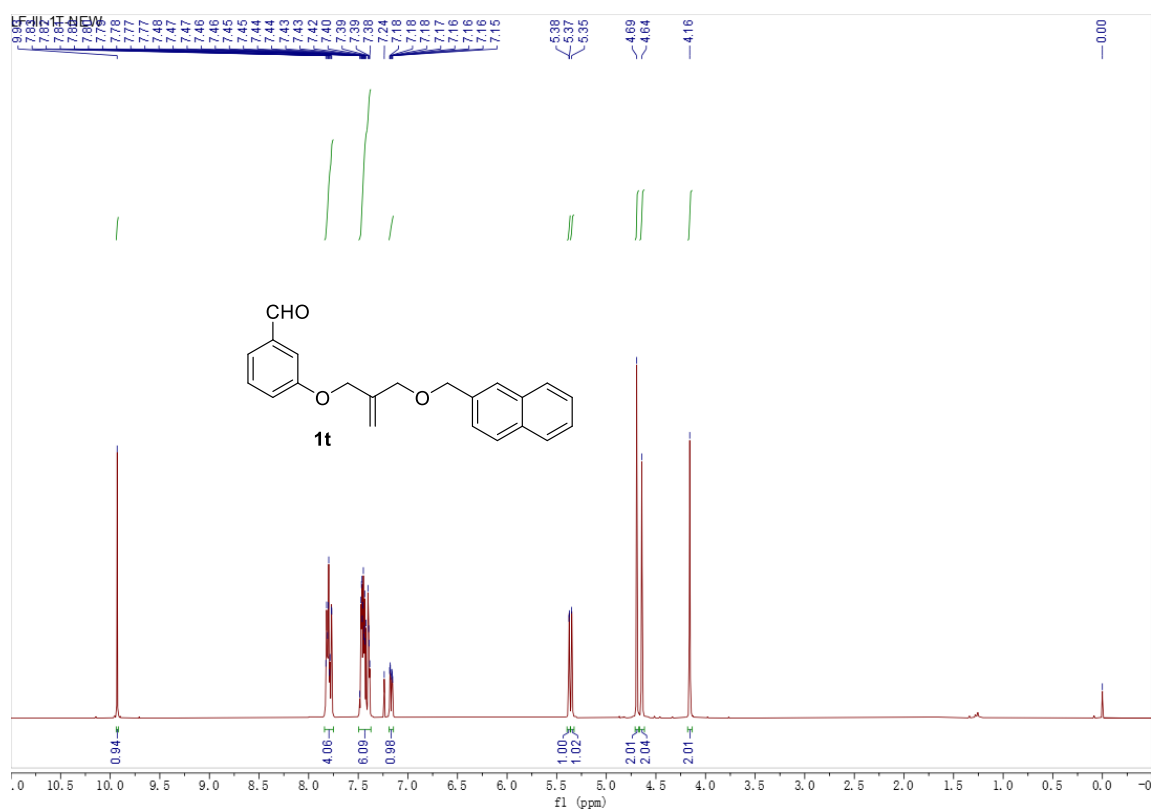

$^{13}\text{C}$  NMR (101 MHz,  $\text{CDCl}_3$ ) of compound **1t**

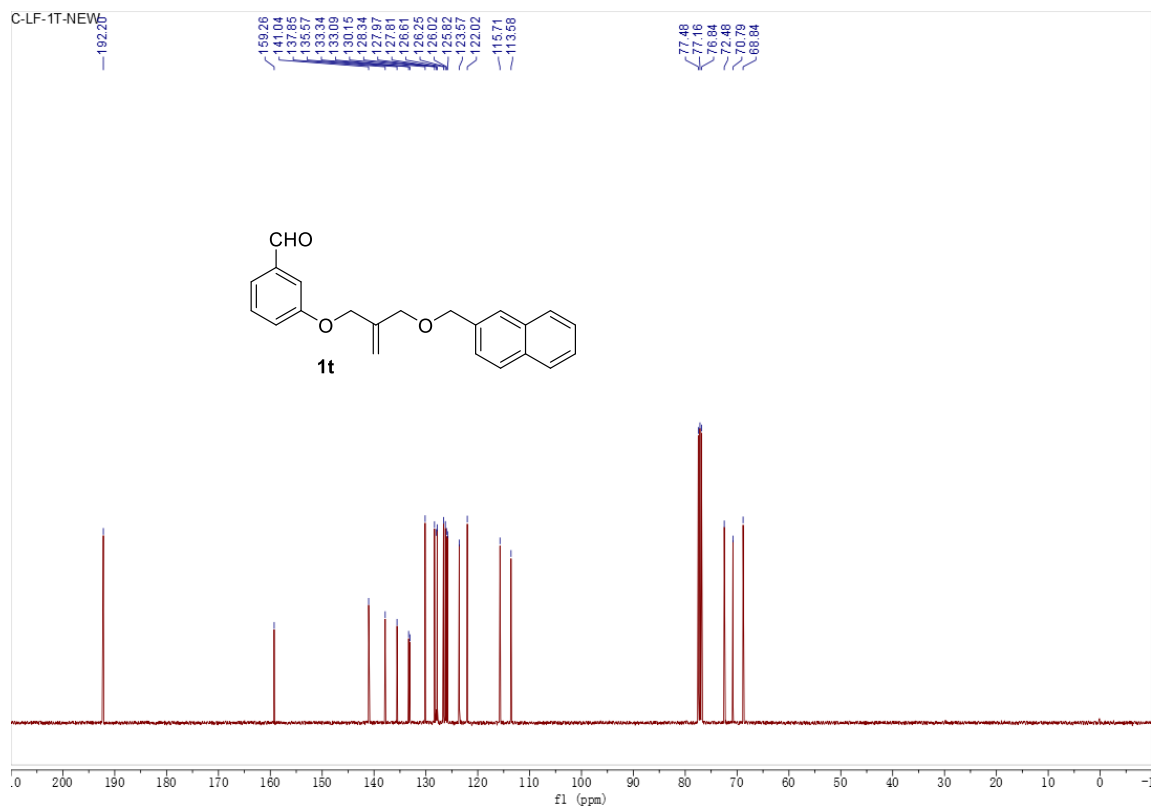

<sup>1</sup>H NMR (400 MHz, CDCl<sub>3</sub>) of compound **1u**

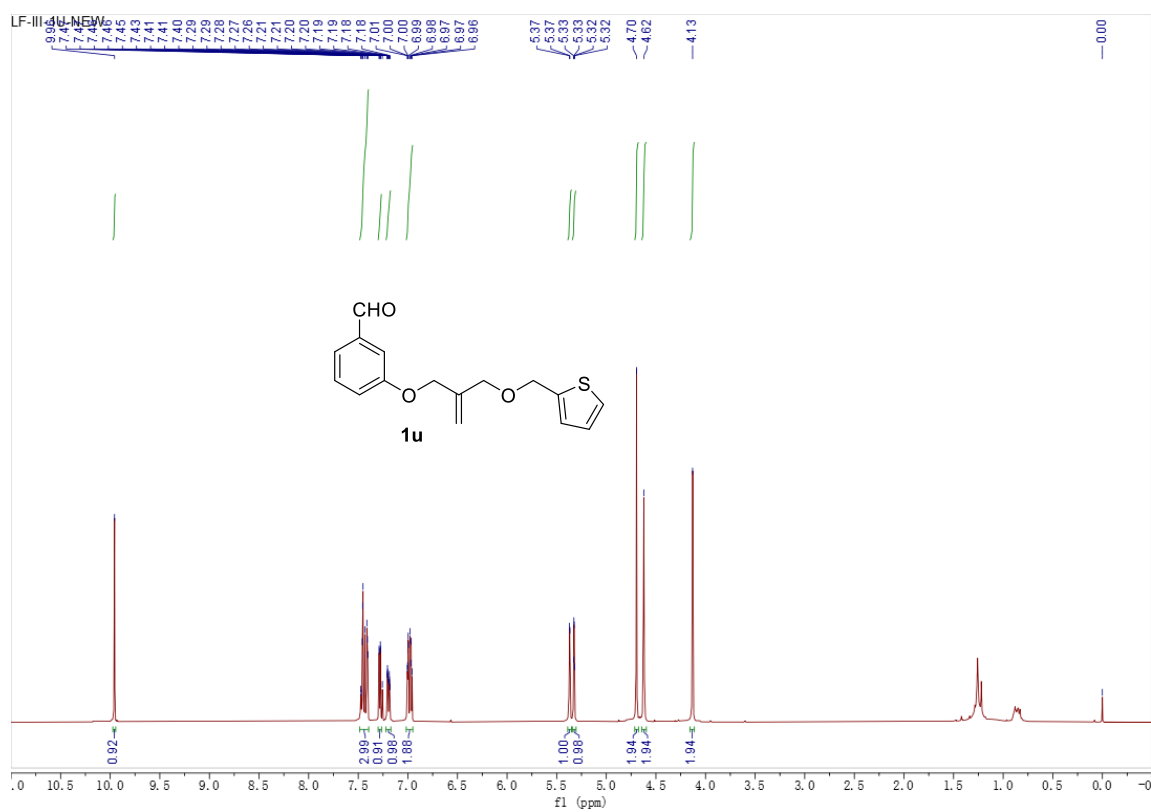

<sup>13</sup>C NMR (101 MHz, CDCl<sub>3</sub>) of compound **1u**

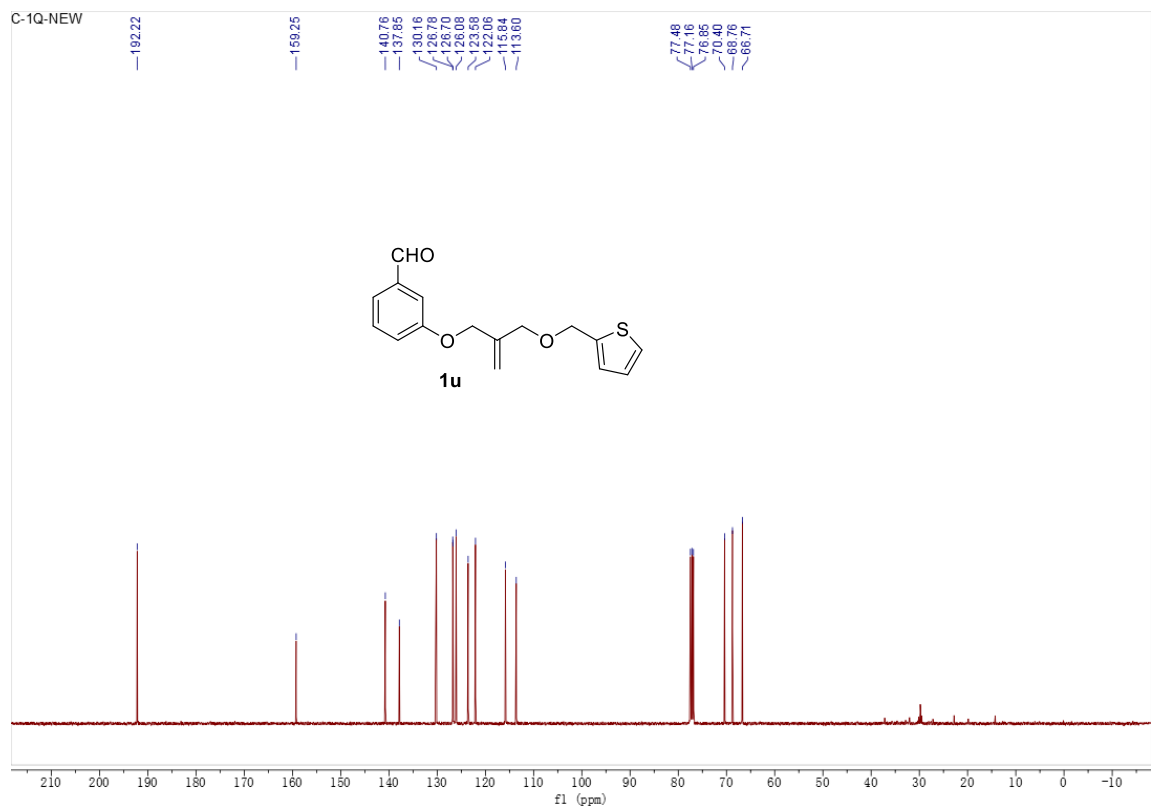

$^1\text{H}$  NMR (400 MHz,  $\text{CDCl}_3$ ) of compound **1v**

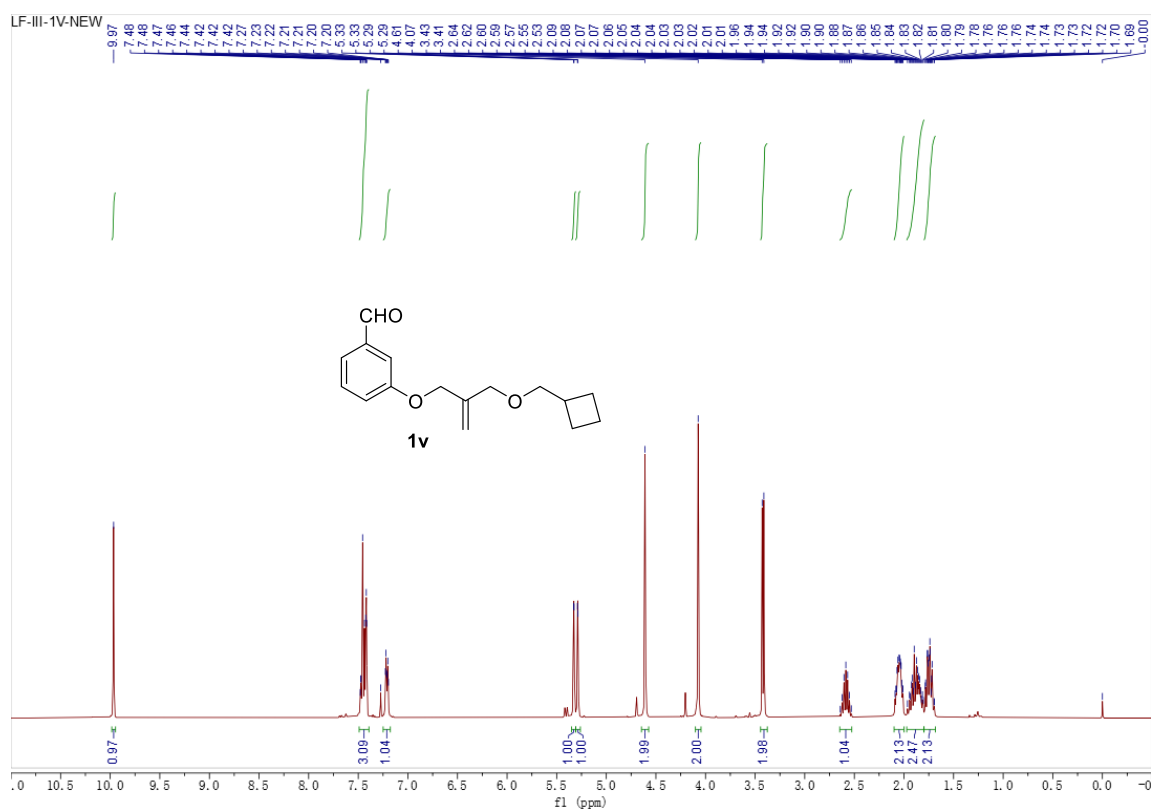

$^{13}\text{C}$  NMR (101 MHz,  $\text{CDCl}_3$ ) of compound **1v**

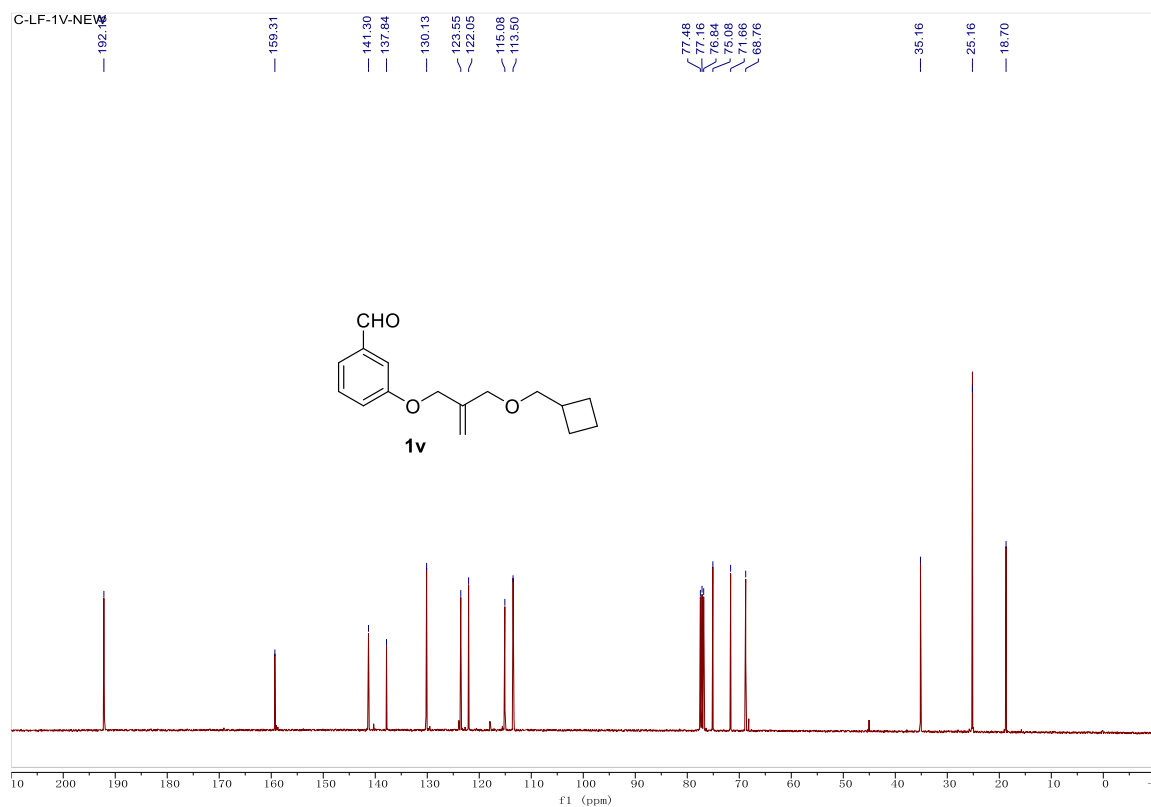

<sup>1</sup>H NMR (400 MHz, CDCl<sub>3</sub>) of compound **1w**

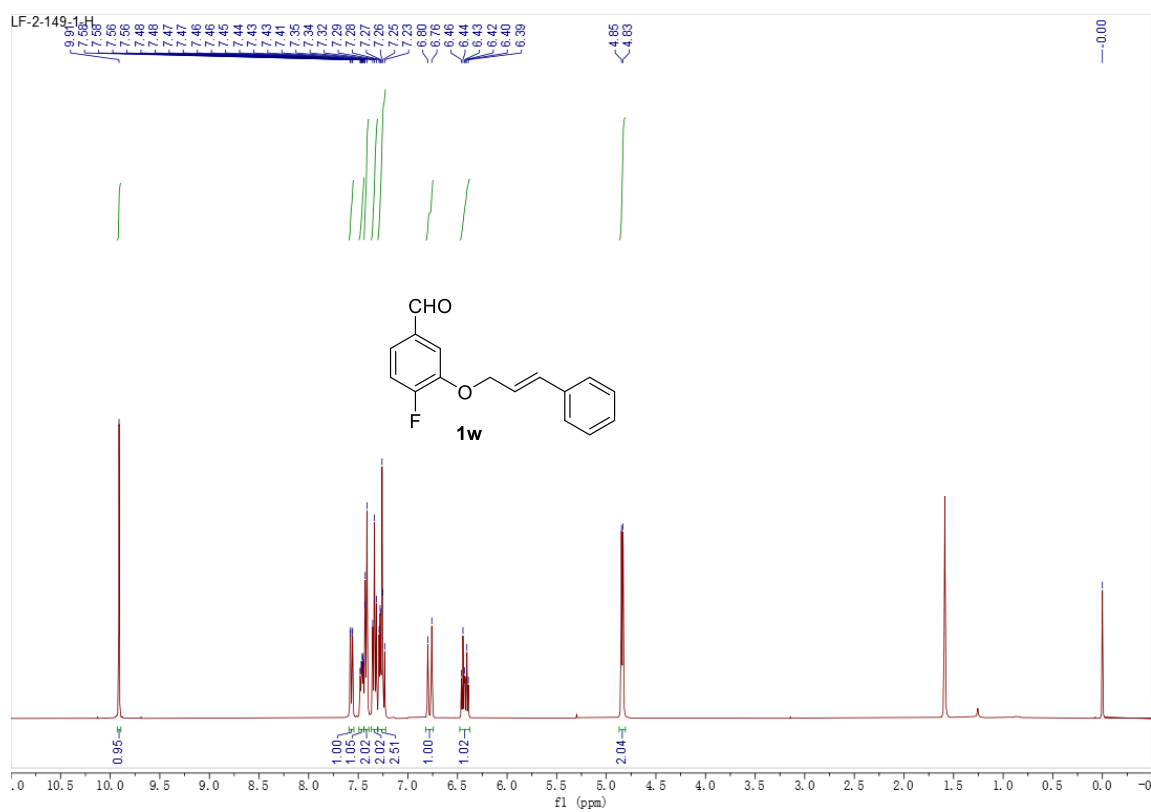

<sup>13</sup>C NMR (101 MHz, CDCl<sub>3</sub>) of compound **1w**

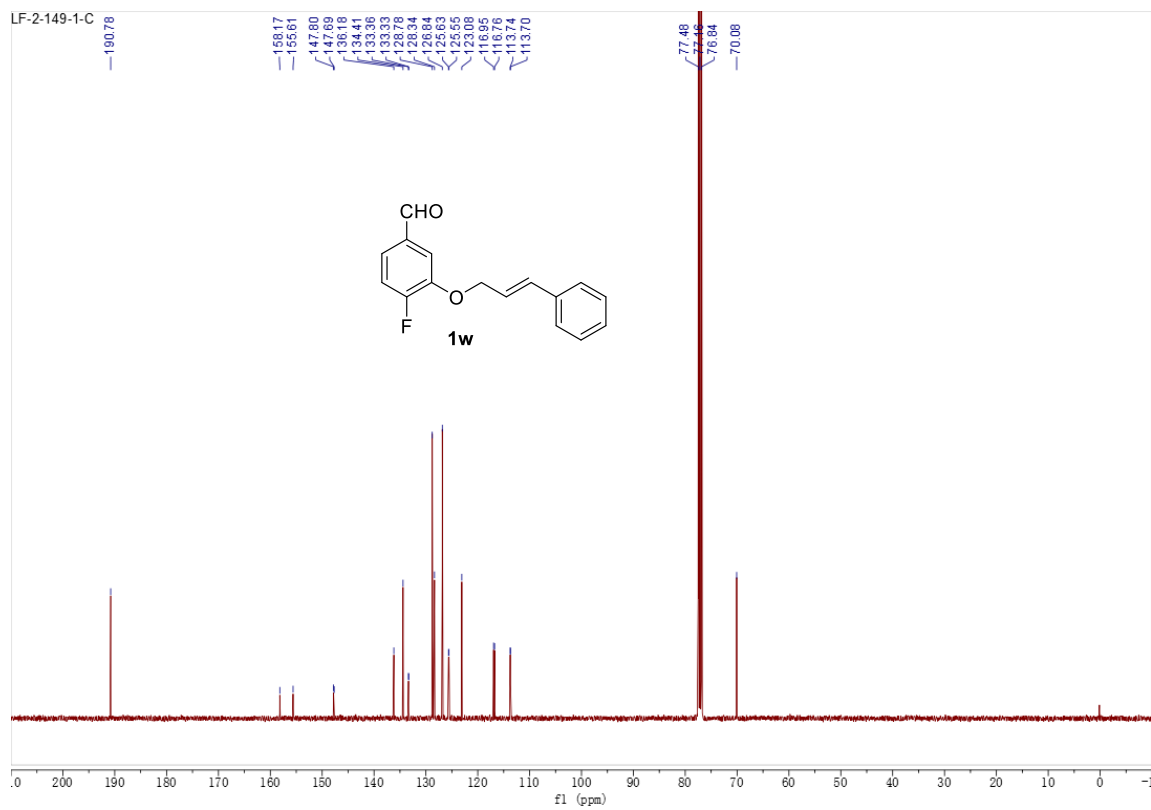

<sup>1</sup>H NMR (400 MHz, CDCl<sub>3</sub>) of compound **1x**

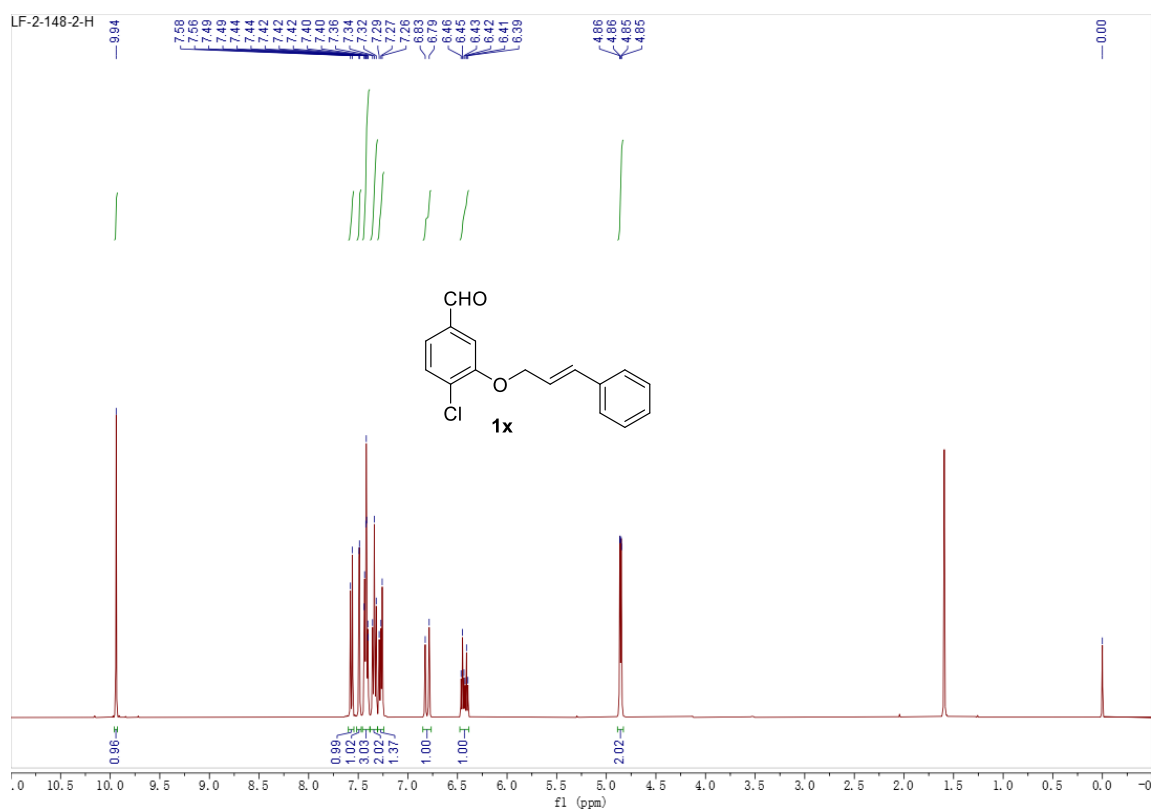

<sup>13</sup>C NMR (101 MHz, CDCl<sub>3</sub>) of compound **1x**

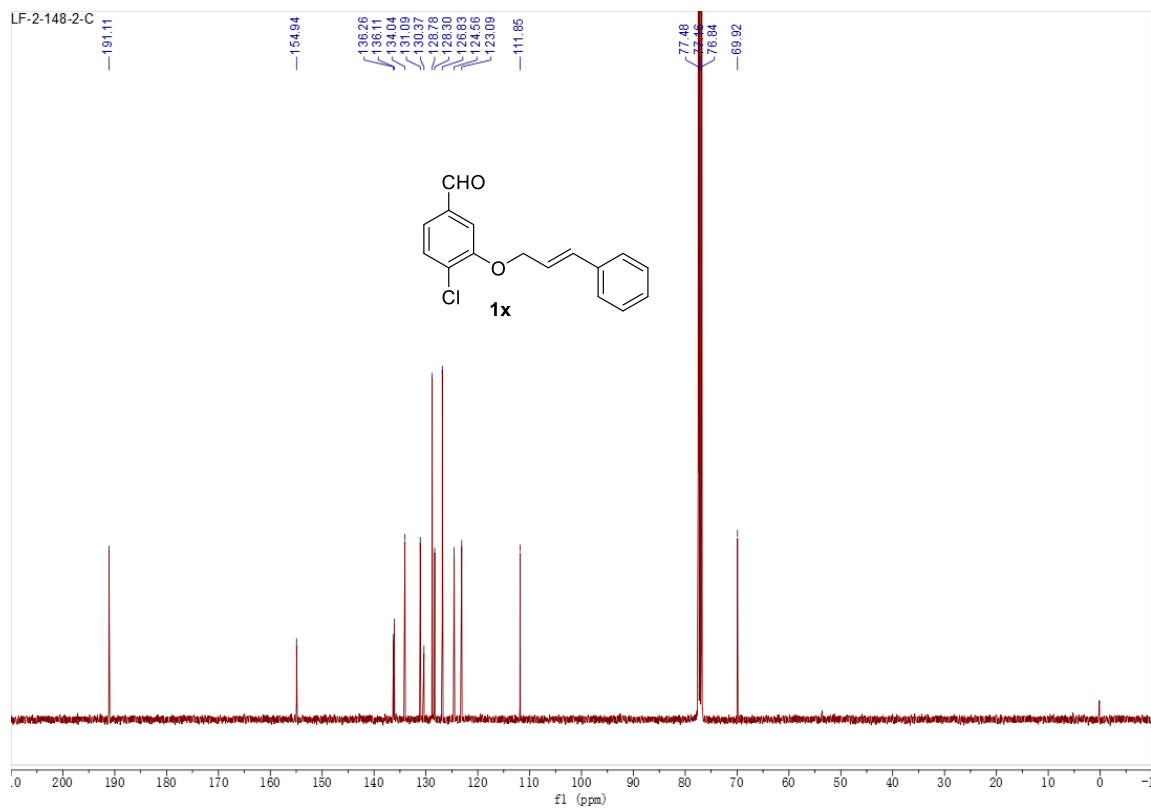

<sup>1</sup>H NMR (400 MHz, CDCl<sub>3</sub>) of compound **1y**

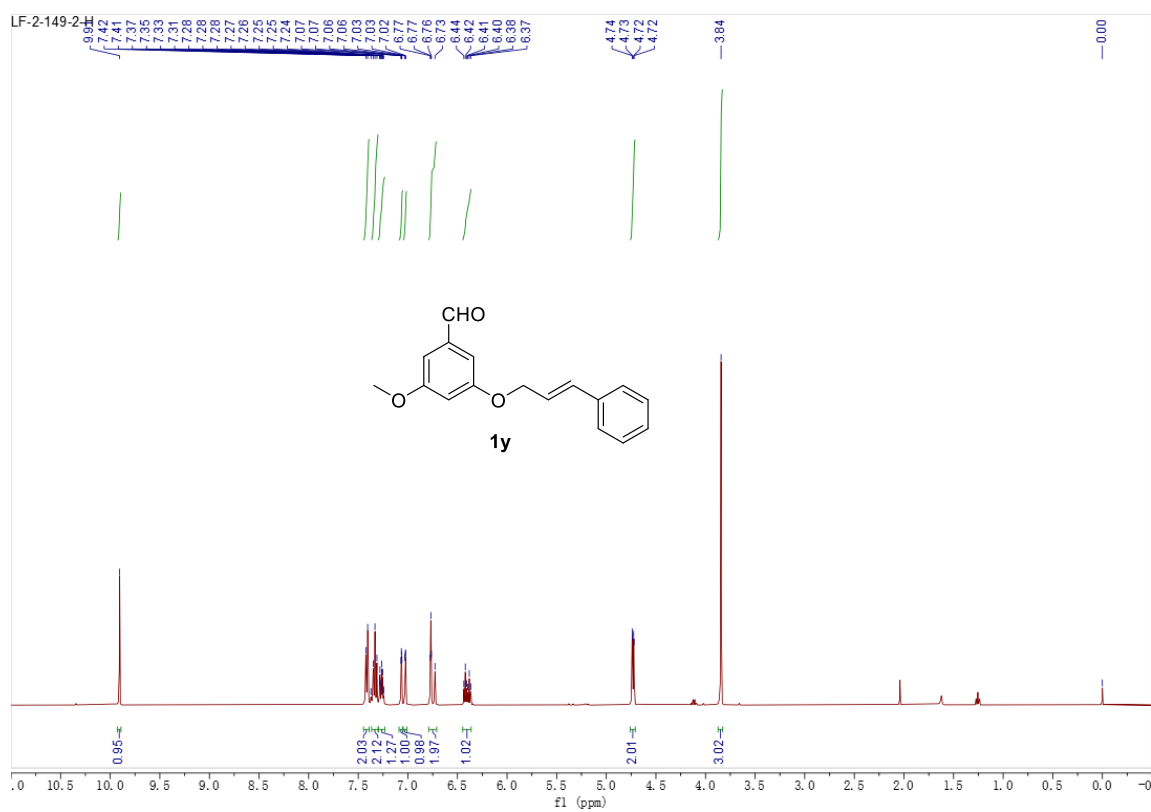

<sup>13</sup>C NMR (101 MHz, CDCl<sub>3</sub>) of compound **1y**

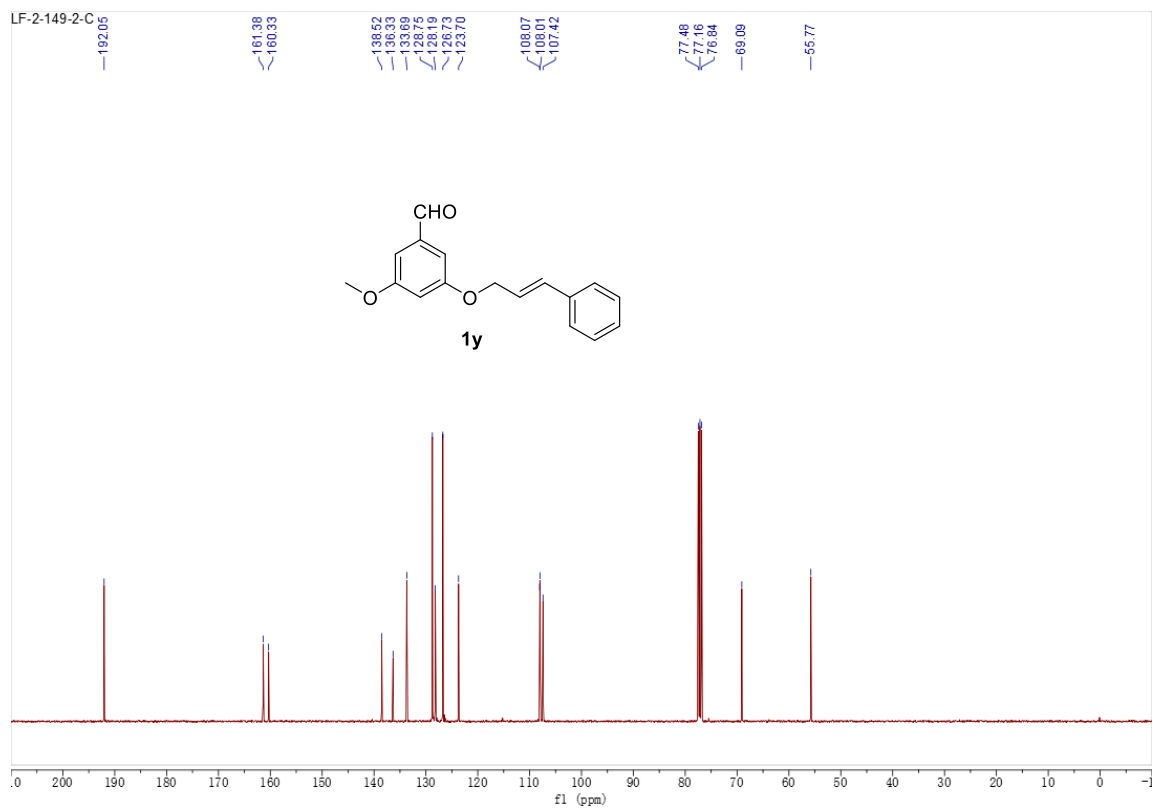

<sup>1</sup>H NMR (400 MHz, CDCl<sub>3</sub>) of compound **1z**

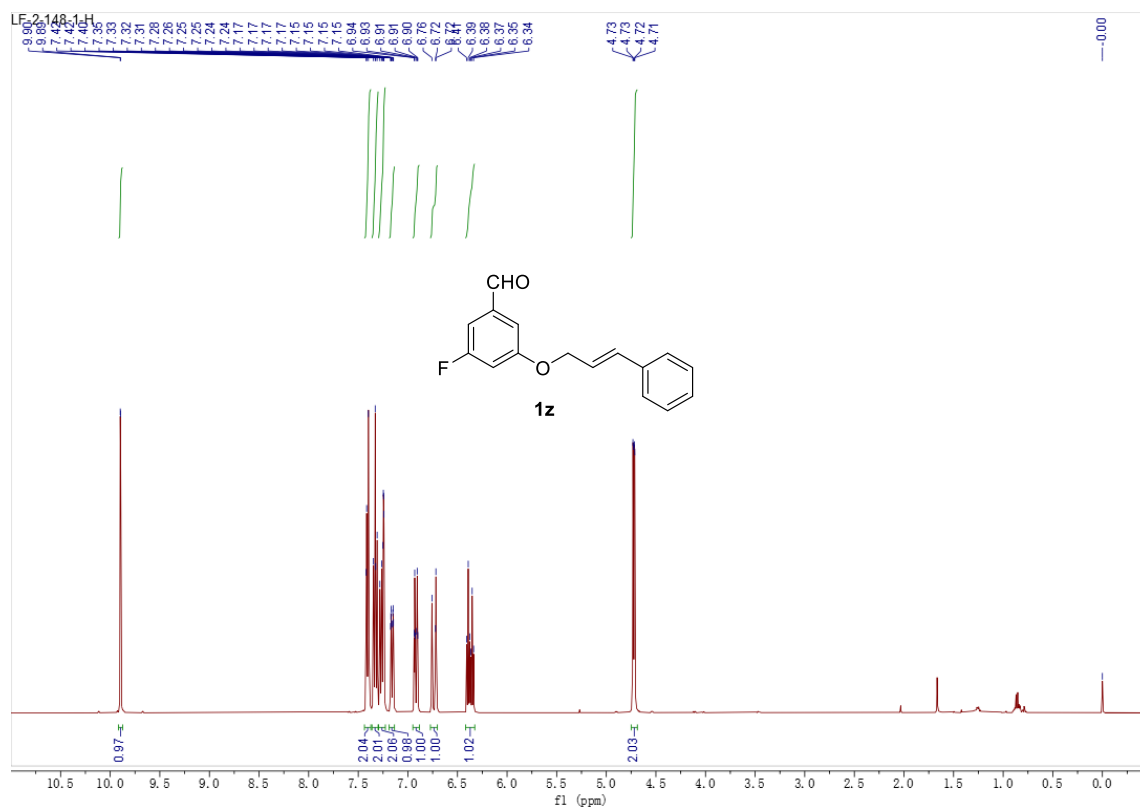

<sup>13</sup>C NMR (101 MHz, CDCl<sub>3</sub>) of compound **1z**

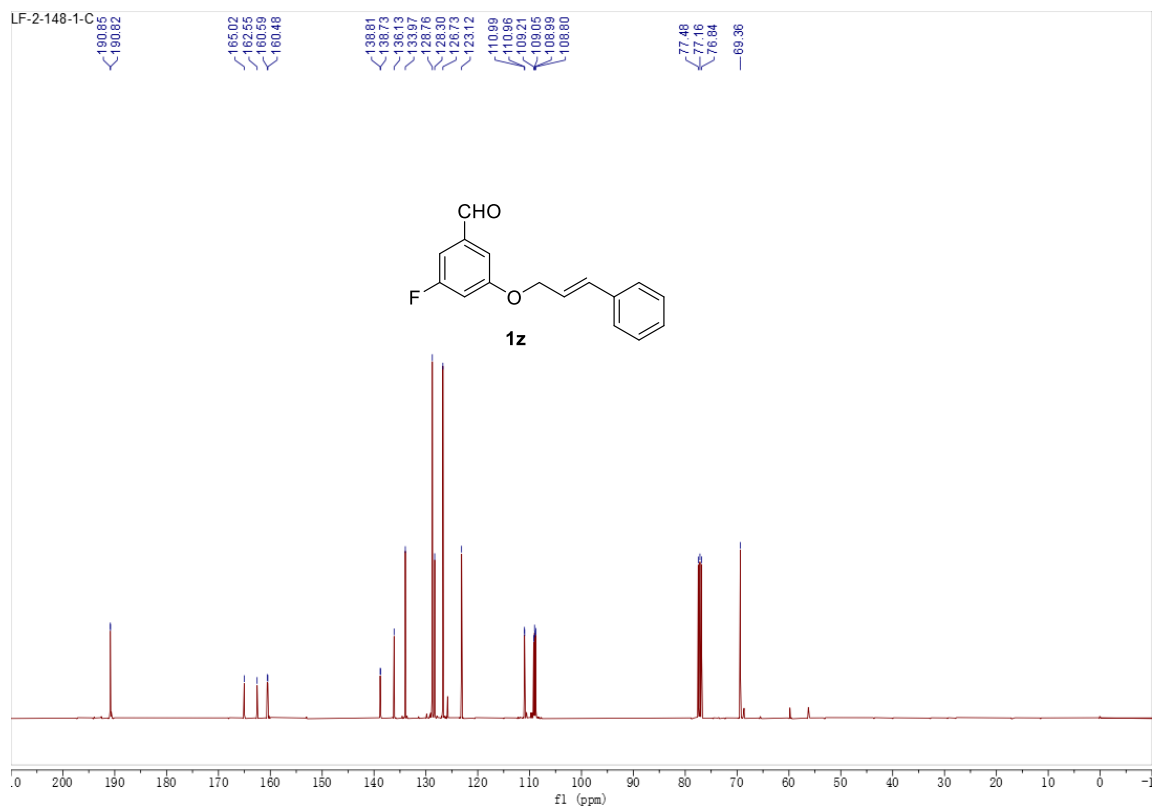

<sup>1</sup>H NMR (400 MHz, CDCl<sub>3</sub>) of compound **1za**

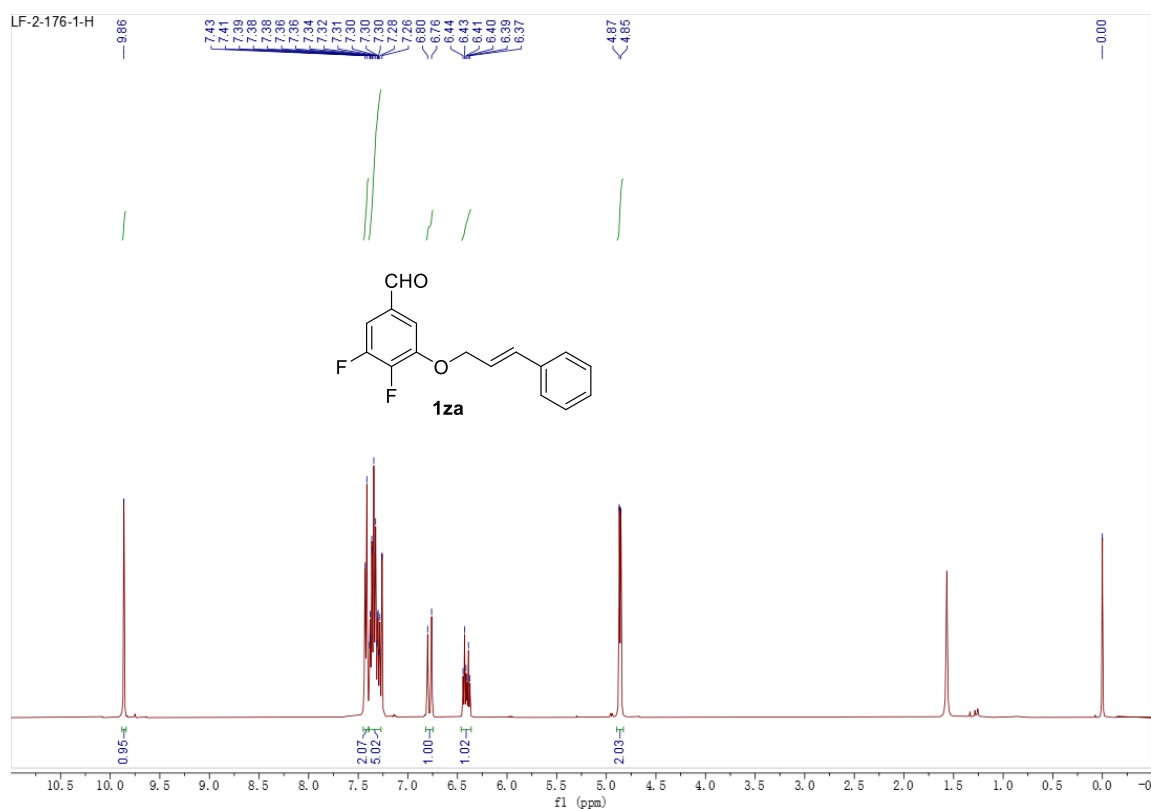

<sup>13</sup>C NMR (101 MHz, CDCl<sub>3</sub>) of compound **1za**

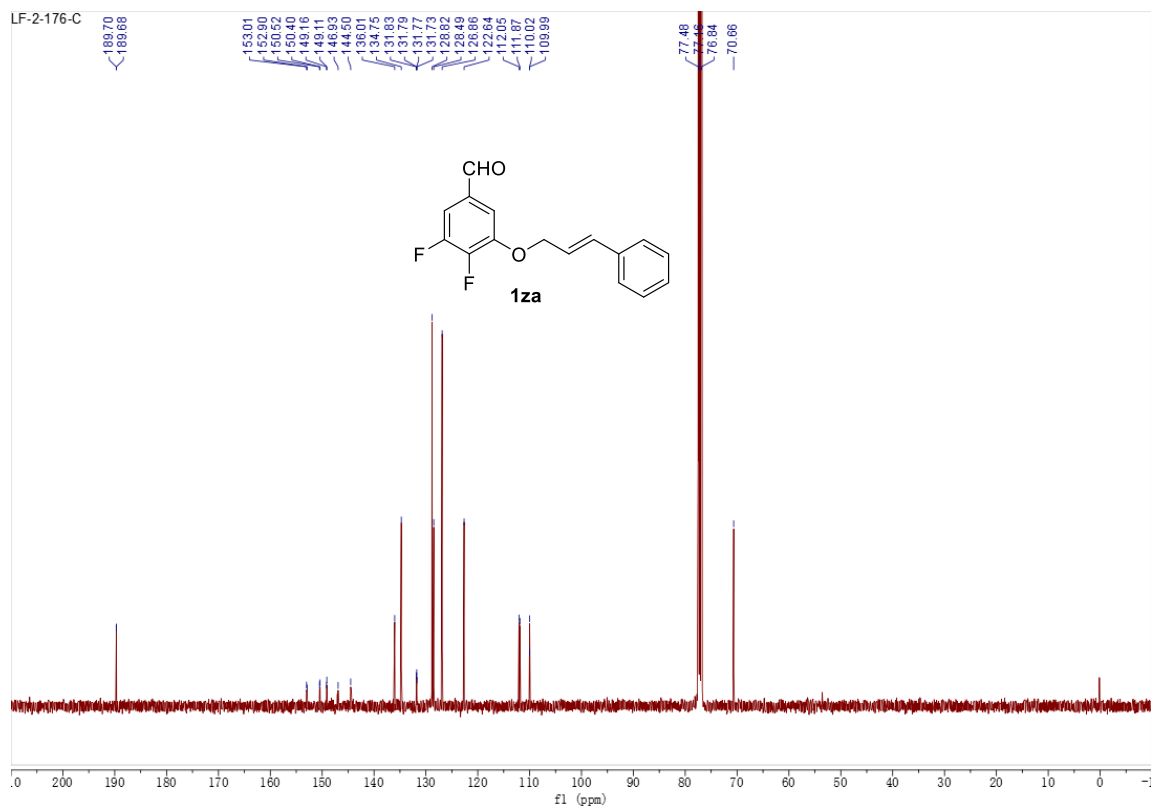

<sup>1</sup>H NMR (400 MHz, CDCl<sub>3</sub>) of compound **3aa**

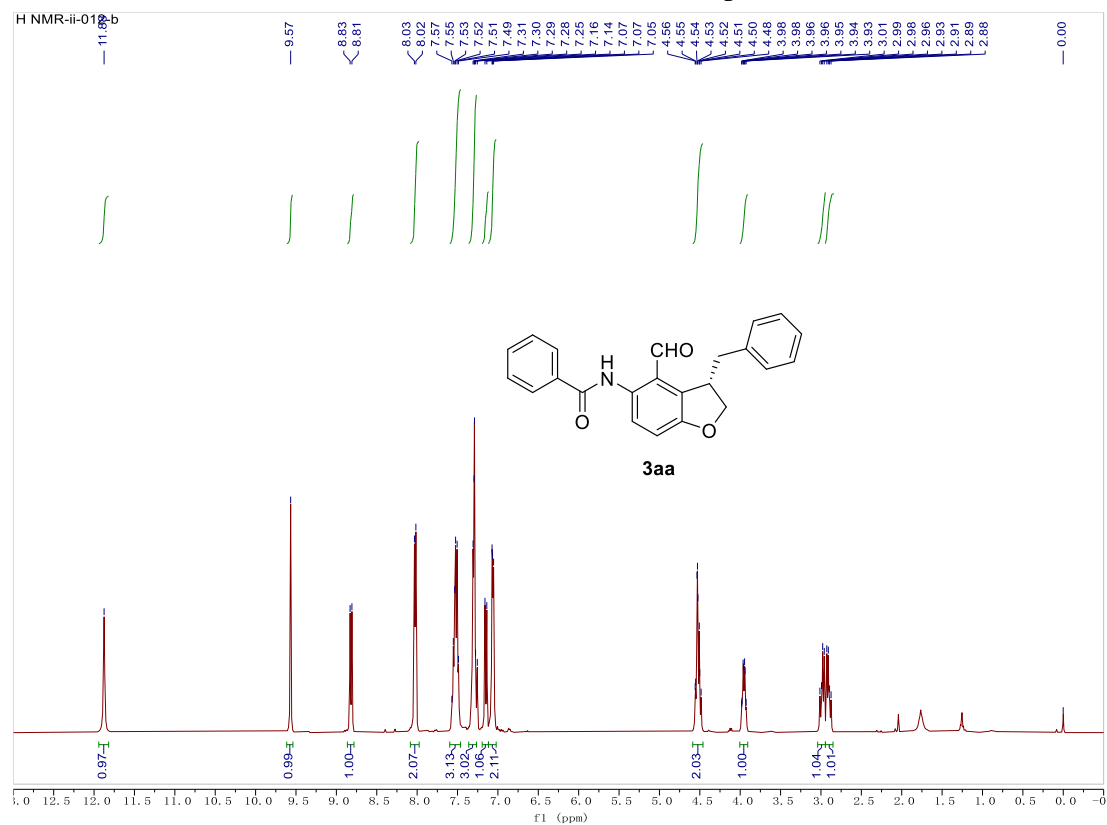

<sup>13</sup>C NMR (101 MHz, CDCl<sub>3</sub>) of compound **3aa**

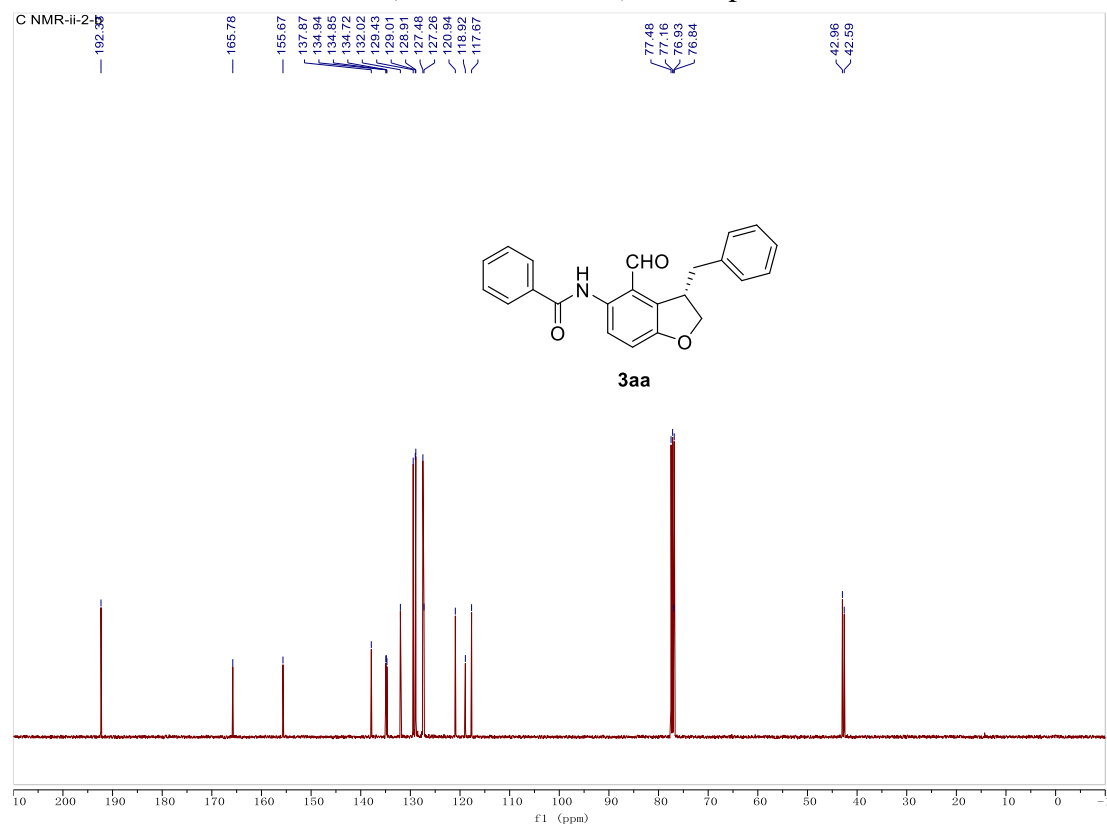

# HPLC spectra and data of compound 3aa

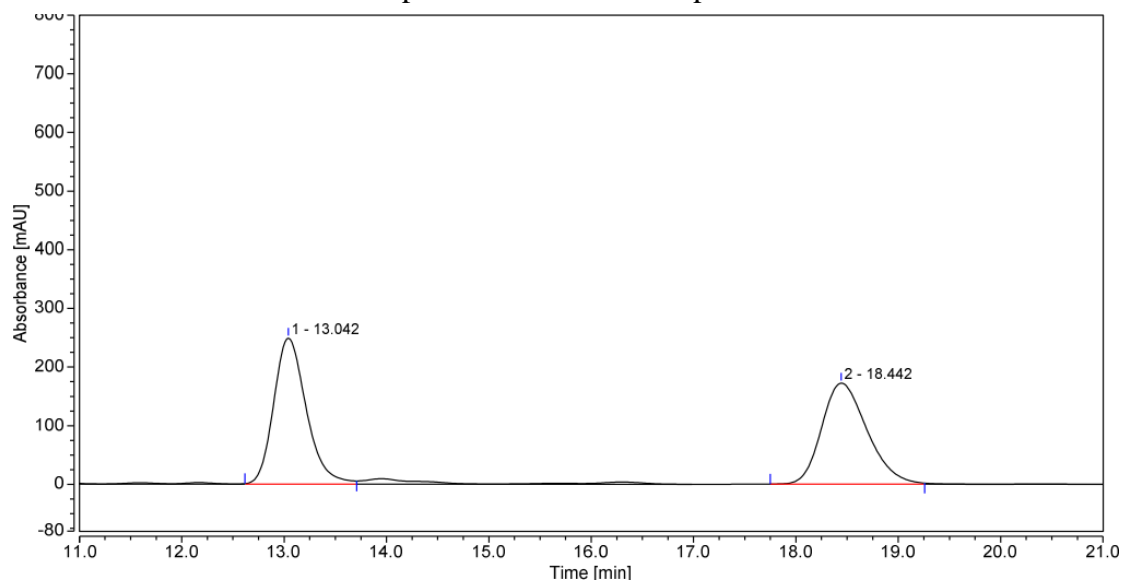

| Integration Results |           |                    |              |            |                 |                   |             |
|---------------------|-----------|--------------------|--------------|------------|-----------------|-------------------|-------------|
| No.                 | Peak Name | Retention Time min | Area mAU*min | Height mAU | Relative Area % | Relative Height % | Amount n.a. |
| 1                   |           | 13.042             | 91.917       | 249.015    | 50.95           | 59.11             | n.a.        |
| 2                   |           | 18.442             | 88.487       | 172.269    | 49.05           | 40.89             | n.a.        |
| Total:              |           |                    | 180.404      | 421.285    | 100.00          | 100.00            |             |

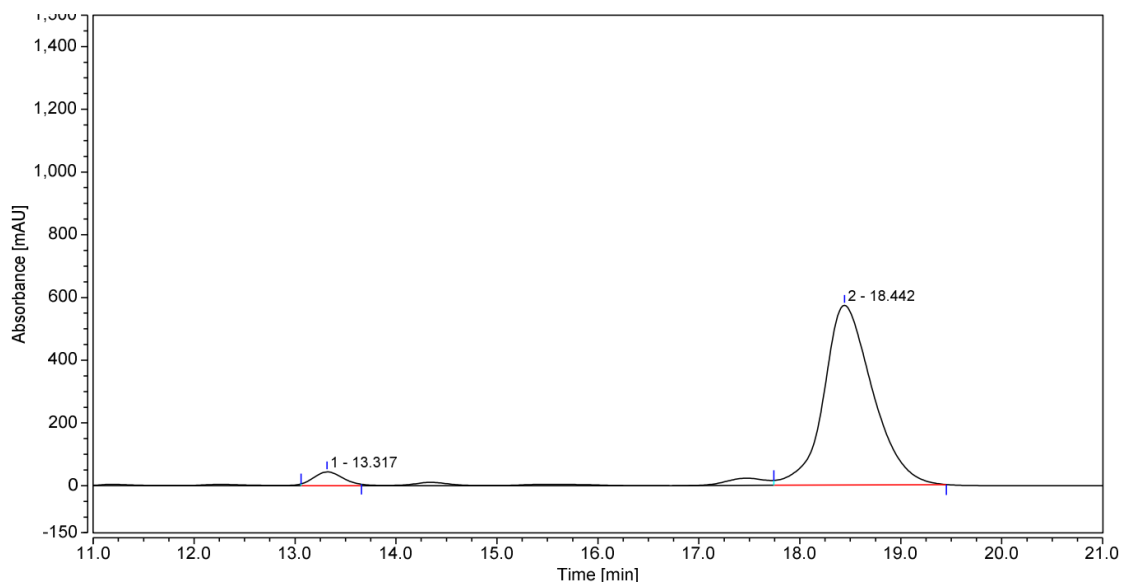

| Integration Results |           |                    |              |            |                 |                   |             |
|---------------------|-----------|--------------------|--------------|------------|-----------------|-------------------|-------------|
| No.                 | Peak Name | Retention Time min | Area mAU*min | Height mAU | Relative Area % | Relative Height % | Amount n.a. |
| 1                   |           | 13.317             | 14.646       | 43.730     | 4.37            | 7.10              | n.a.        |
| 2                   |           | 18.442             | 320.692      | 572.615    | 95.63           | 92.90             | n.a.        |
| Total:              |           |                    | 335.337      | 616.346    | 100.00          | 100.00            |             |

<sup>1</sup>H NMR (400 MHz, CDCl<sub>3</sub>) of compound **3ba**

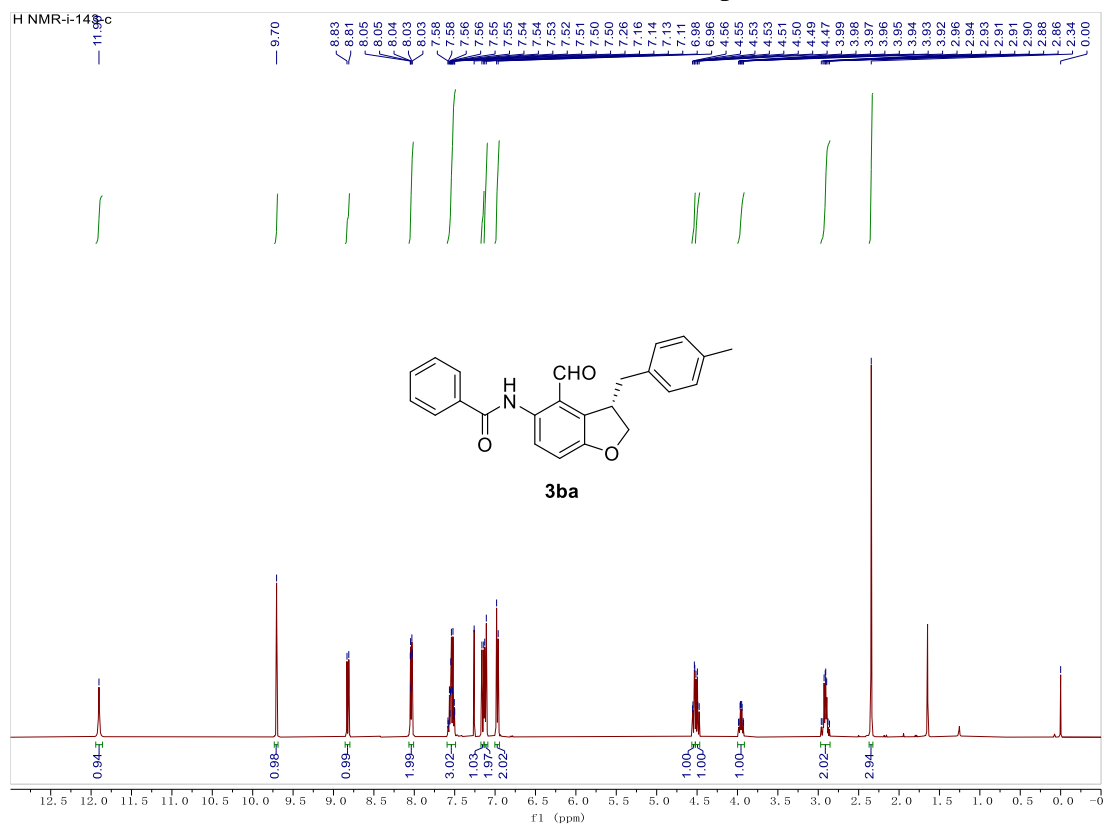

<sup>13</sup>C NMR (101 MHz, CDCl<sub>3</sub>) of compound **3ba**

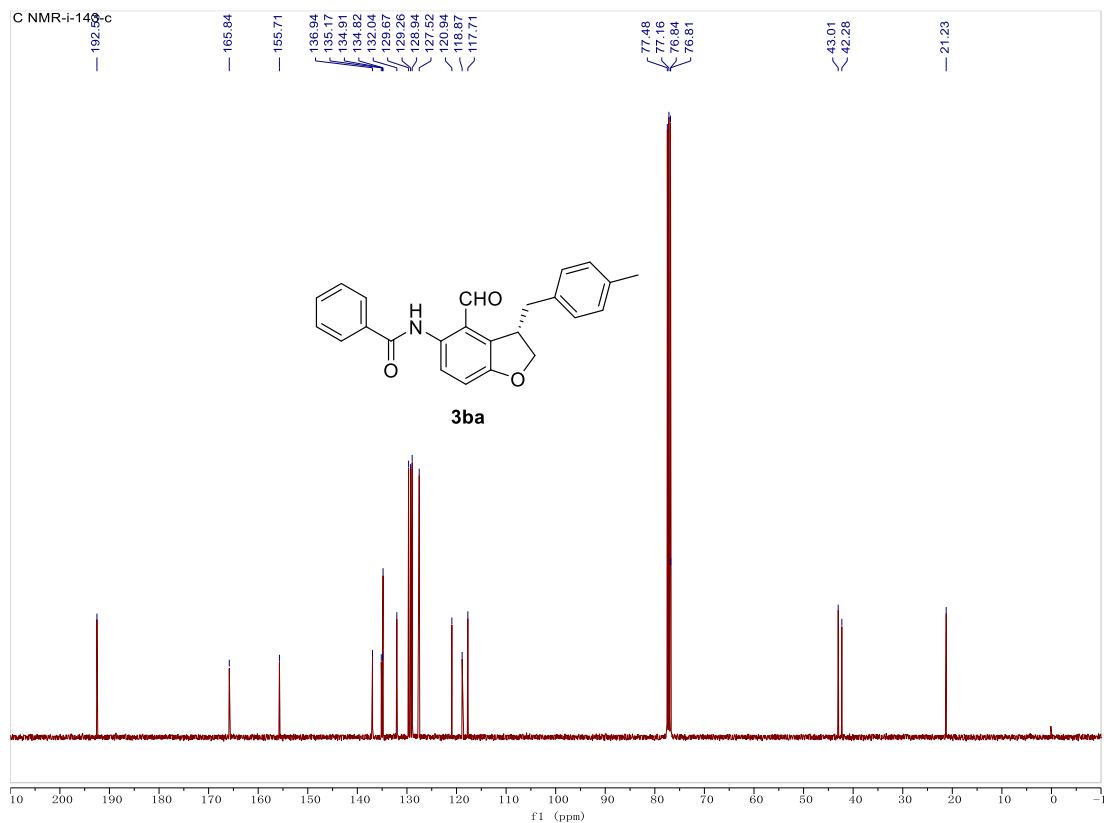

# HPLC spectra and data of compound **3ba**

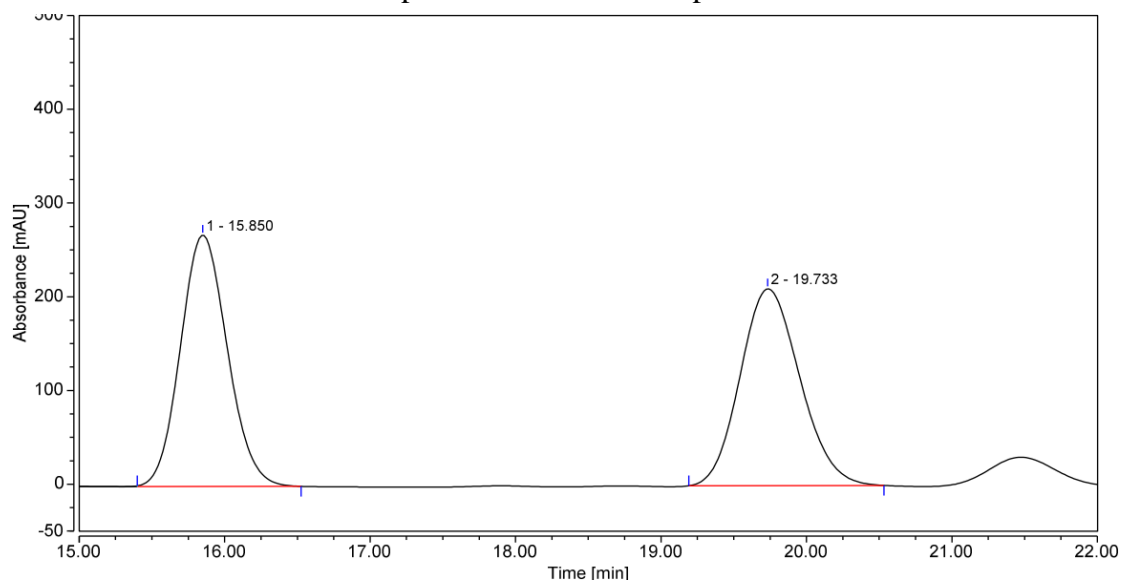

| Integration Results |           |                       |                 |               |                    |                      |                |
|---------------------|-----------|-----------------------|-----------------|---------------|--------------------|----------------------|----------------|
| No.                 | Peak Name | Retention Time<br>min | Area<br>mAU*min | Height<br>mAU | Relative Area<br>% | Relative Height<br>% | Amount<br>n.a. |
| 1                   |           | 15.850                | 100.250         | 268.104       | 50.09              | 56.10                | n.a.           |
| 2                   |           | 19.733                | 99.887          | 209.824       | 49.91              | 43.90                | n.a.           |
| Total:              |           |                       | 200.137         | 477.927       | 100.00             | 100.00               |                |

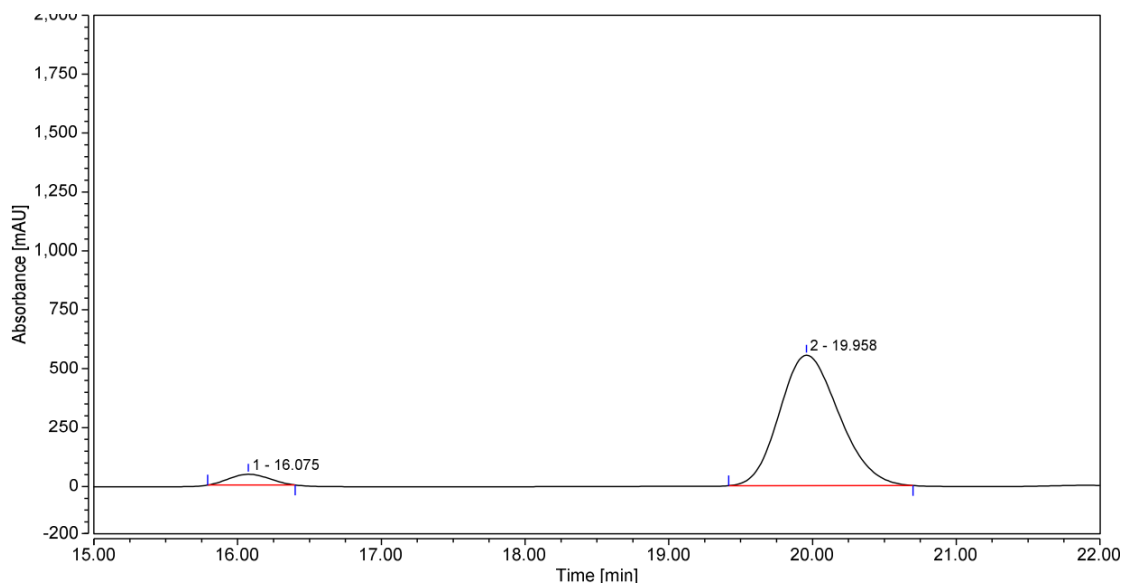

| Integration Results |           |                       |                 |               |                    |                      |                |
|---------------------|-----------|-----------------------|-----------------|---------------|--------------------|----------------------|----------------|
| No.                 | Peak Name | Retention Time<br>min | Area<br>mAU*min | Height<br>mAU | Relative Area<br>% | Relative Height<br>% | Amount<br>n.a. |
| 1                   |           | 16.075                | 14.722          | 45.821        | 5.25               | 7.64                 | n.a.           |
| 2                   |           | 19.958                | 265.460         | 553.658       | 94.75              | 92.36                | n.a.           |
| Total:              |           |                       | 280.182         | 599.479       | 100.00             | 100.00               |                |

<sup>1</sup>H NMR (400 MHz, CDCl<sub>3</sub>) of compound **3ca**

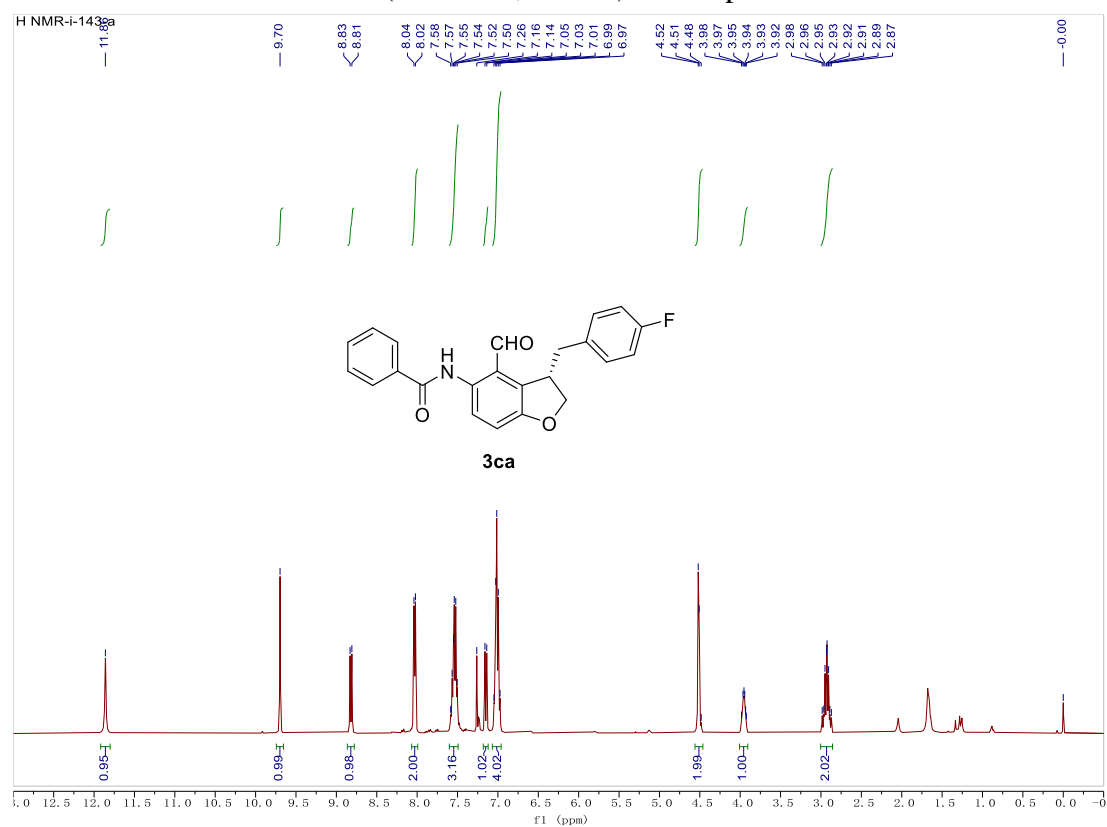

<sup>13</sup>C NMR (101 MHz, CDCl<sub>3</sub>) of compound **3ca**

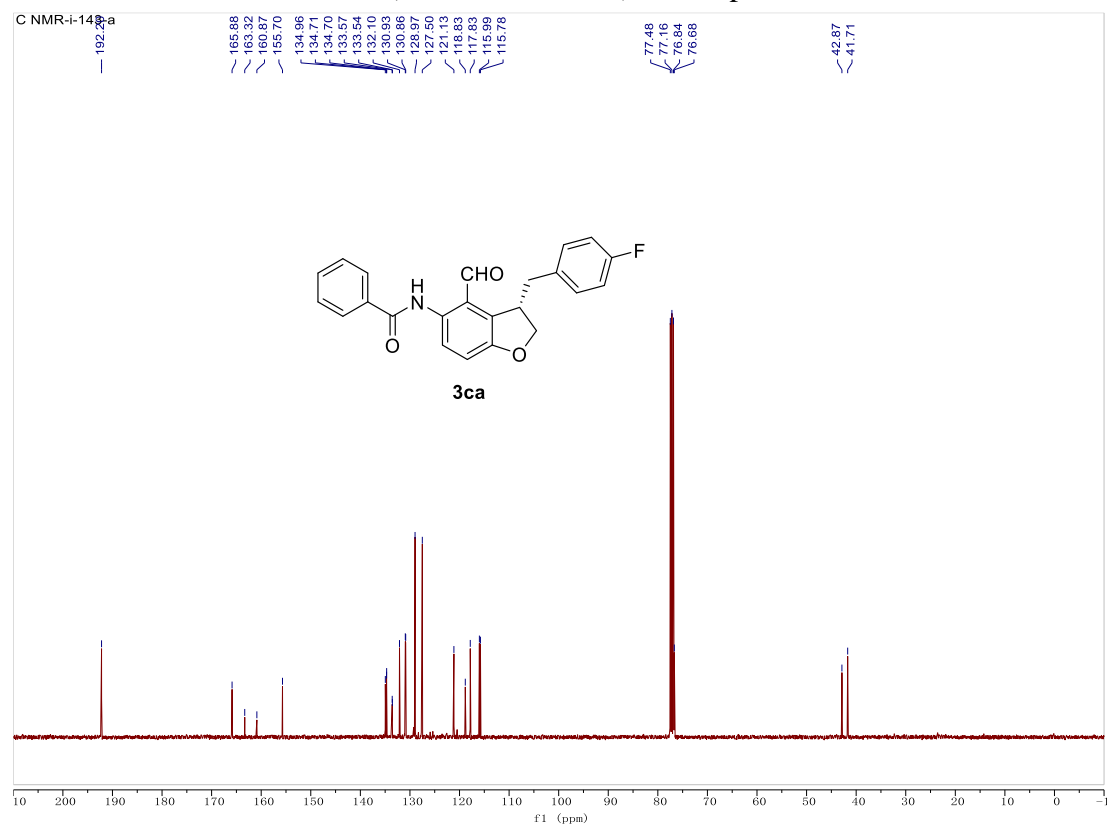

# HPLC spectra and data of compound 3ca

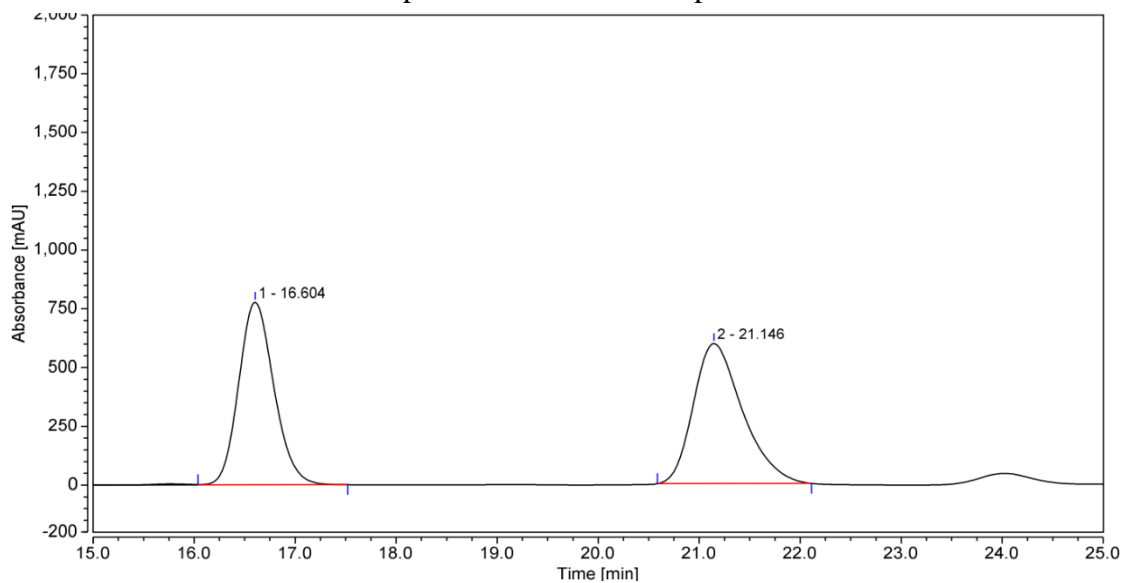

| Integration Results |           |                       |                 |               |                    |                      |                |
|---------------------|-----------|-----------------------|-----------------|---------------|--------------------|----------------------|----------------|
| No.                 | Peak Name | Retention Time<br>min | Area<br>mAU*min | Height<br>mAU | Relative Area<br>% | Relative Height<br>% | Amount<br>n.a. |
| 1                   |           | 16.604                | 313.746         | 776.700       | 48.28              | 56.58                | n.a.           |
| 2                   |           | 21.146                | 336.137         | 596.048       | 51.72              | 43.42                | n.a.           |
| Total:              |           |                       | 649.883         | 1372.748      | 100.00             | 100.00               |                |

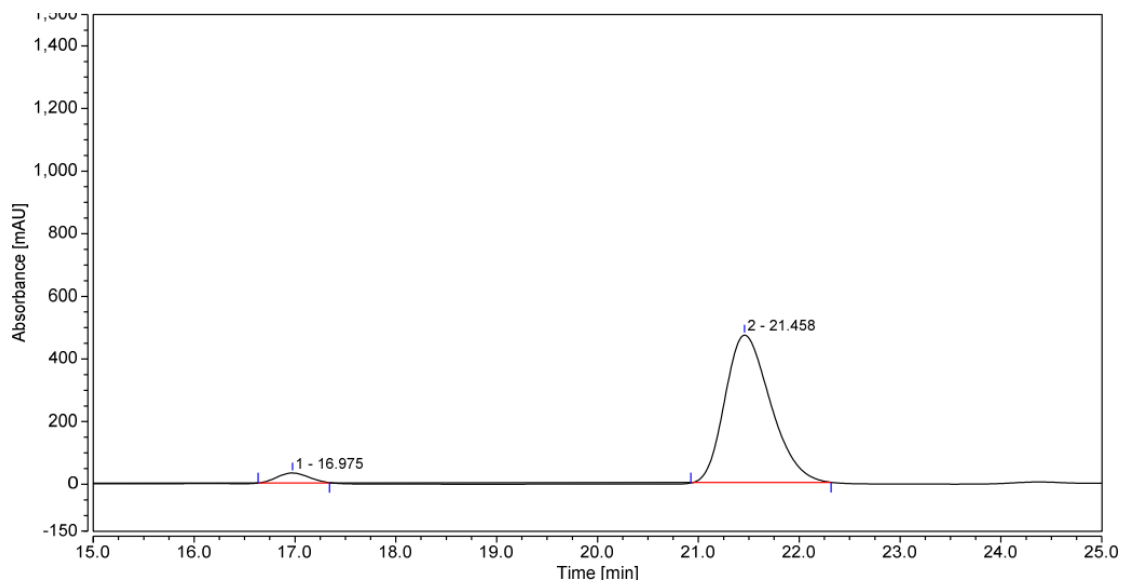

| Integration Results |           |                       |                 |               |                    |                      |                |
|---------------------|-----------|-----------------------|-----------------|---------------|--------------------|----------------------|----------------|
| No.                 | Peak Name | Retention Time<br>min | Area<br>mAU*min | Height<br>mAU | Relative Area<br>% | Relative Height<br>% | Amount<br>n.a. |
| 1                   |           | 16.975                | 11.460          | 31.651        | 4.46               | 6.31                 | n.a.           |
| 2                   |           | 21.458                | 245.779         | 470.330       | 95.54              | 93.69                | n.a.           |
| Total:              |           |                       | 257.240         | 501.980       | 100.00             | 100.00               |                |

<sup>1</sup>H NMR (400 MHz, CDCl<sub>3</sub>) of compound **3da**

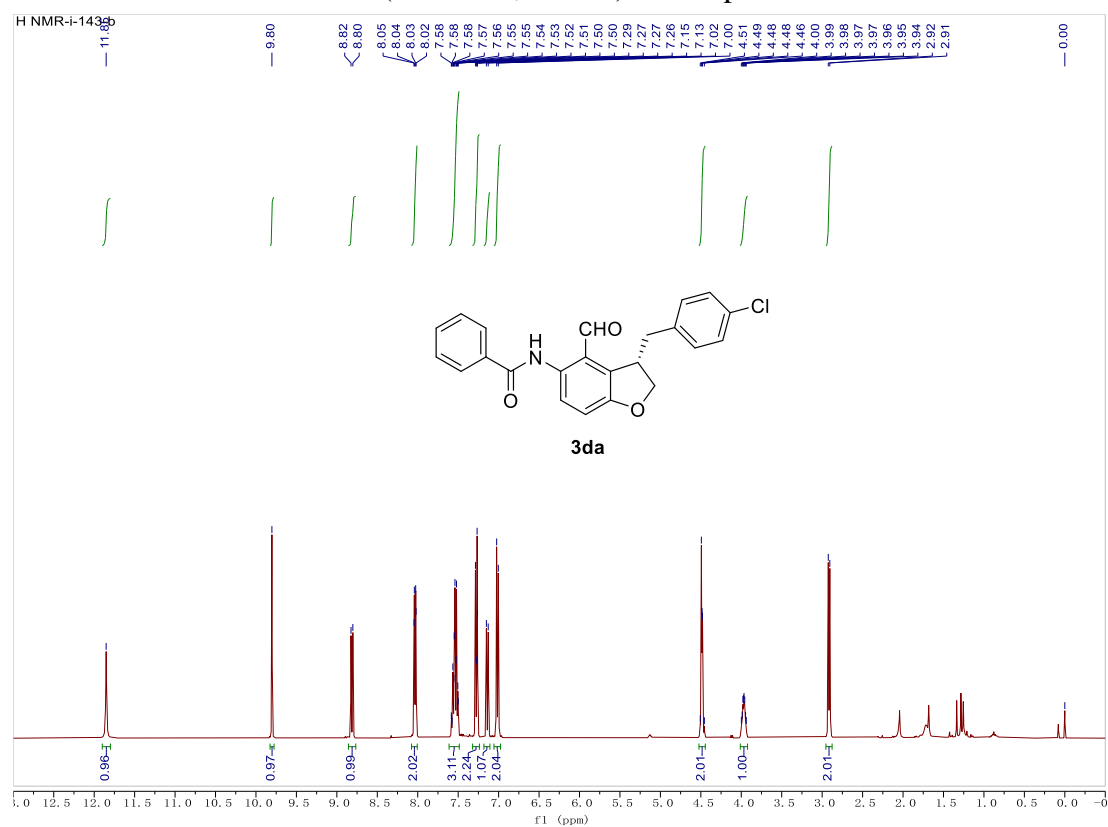

<sup>13</sup>C NMR (101 MHz, CDCl<sub>3</sub>) of compound **3da**

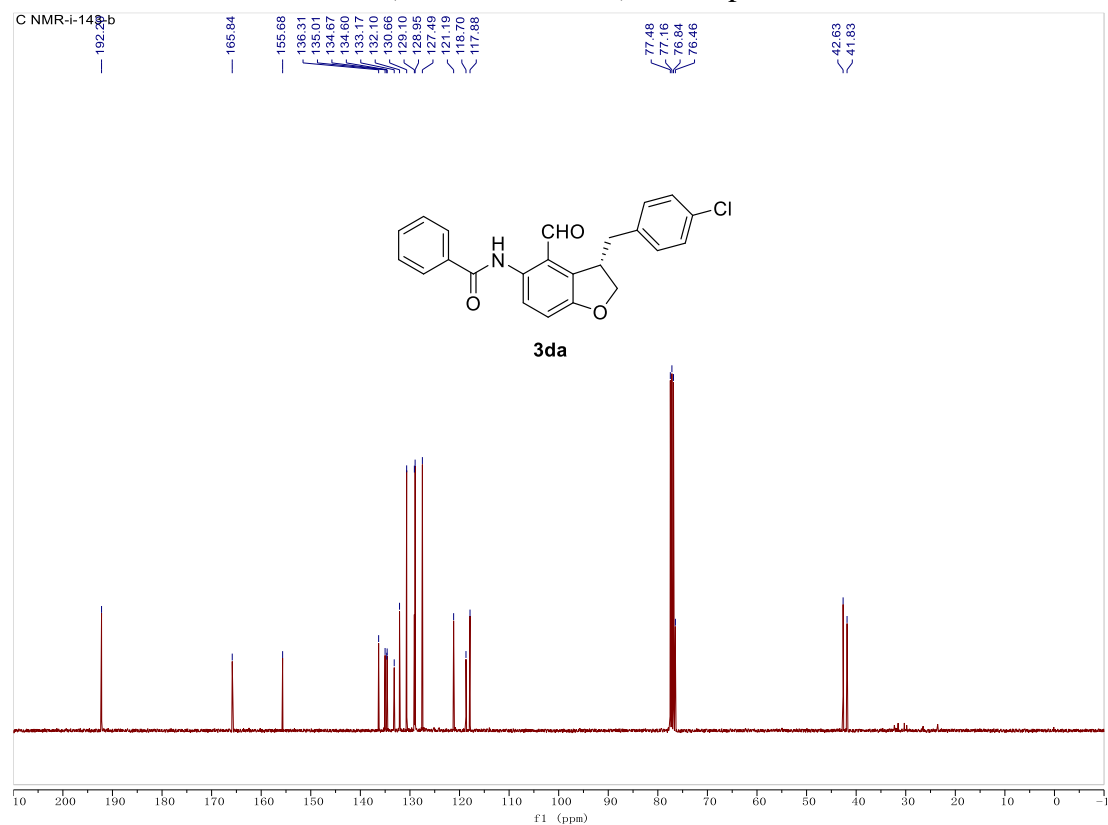

# HPLC spectra and data of compound 3da

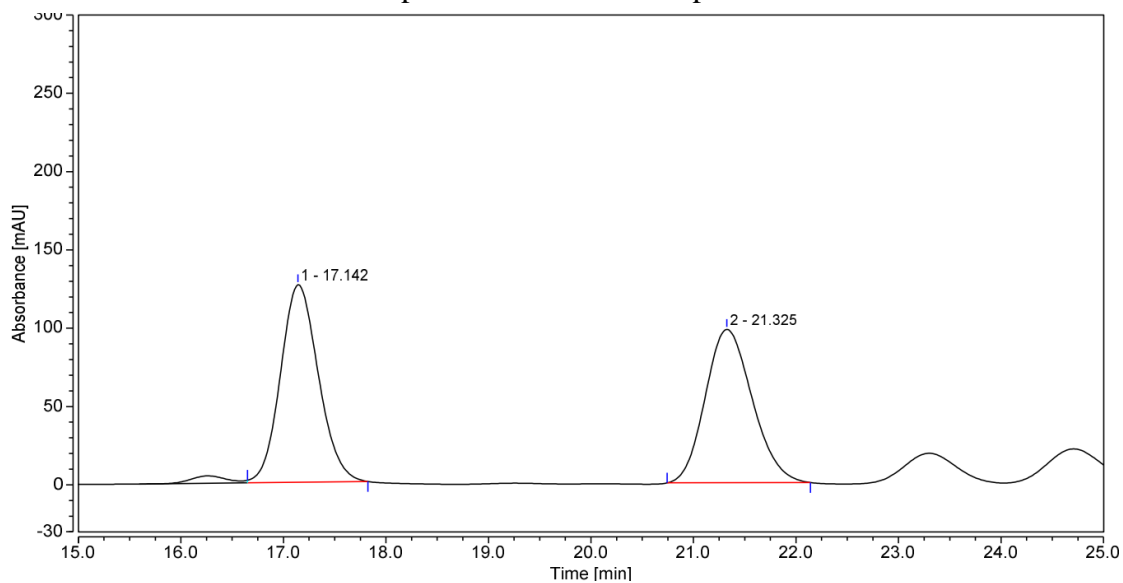

| Integration Results |           |                       |                 |               |                    |                      |                |
|---------------------|-----------|-----------------------|-----------------|---------------|--------------------|----------------------|----------------|
| No.                 | Peak Name | Retention Time<br>min | Area<br>mAU*min | Height<br>mAU | Relative Area<br>% | Relative Height<br>% | Amount<br>n.a. |
| 1                   |           | 17.142                | 54.056          | 126.183       | 50.95              | 56.30                | n.a.           |
| 2                   |           | 21.325                | 52.037          | 97.948        | 49.05              | 43.70                | n.a.           |
| Total:              |           |                       | 106.093         | 224.131       | 100.00             | 100.00               |                |

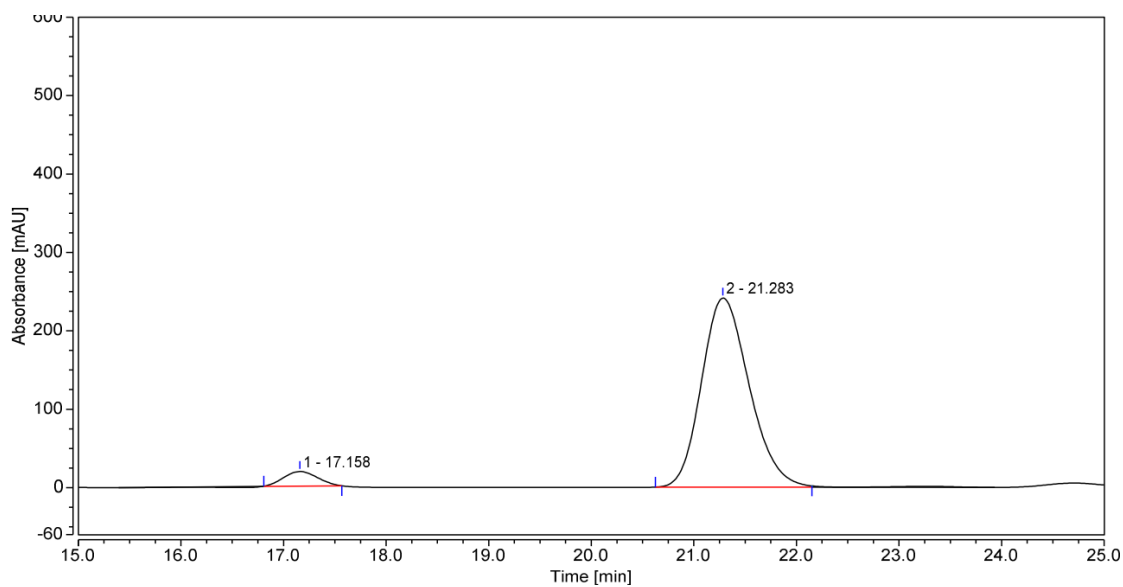

| Integration Results |           |                       |                 |               |                    |                      |                |
|---------------------|-----------|-----------------------|-----------------|---------------|--------------------|----------------------|----------------|
| No.                 | Peak Name | Retention Time<br>min | Area<br>mAU*min | Height<br>mAU | Relative Area<br>% | Relative Height<br>% | Amount<br>n.a. |
| 1                   |           | 17.158                | 7.099           | 18.616        | 5.18               | 7.16                 | n.a.           |
| 2                   |           | 21.283                | 129.909         | 241.339       | 94.82              | 92.84                | n.a.           |
| Total:              |           |                       | 137.007         | 259.956       | 100.00             | 100.00               |                |

<sup>1</sup>H NMR (400 MHz, CDCl<sub>3</sub>) of compound **3ea**

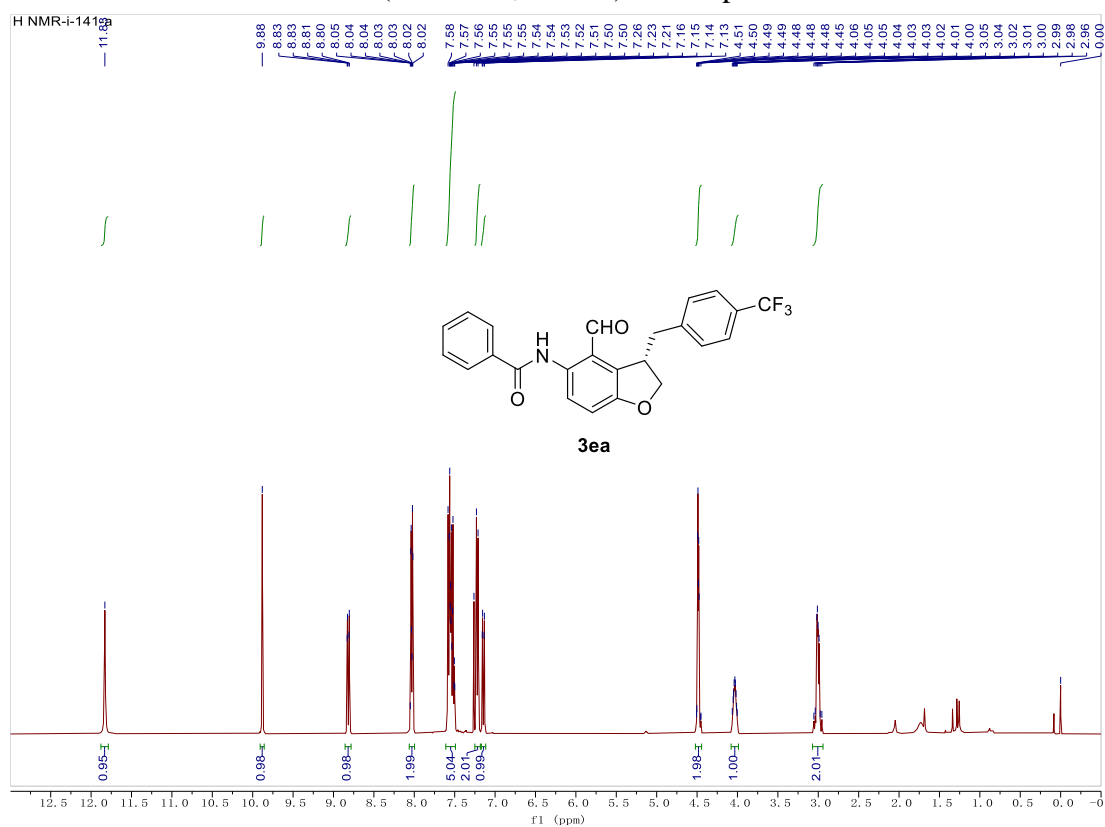

<sup>13</sup>C NMR (101 MHz, CDCl<sub>3</sub>) of compound **3ea**

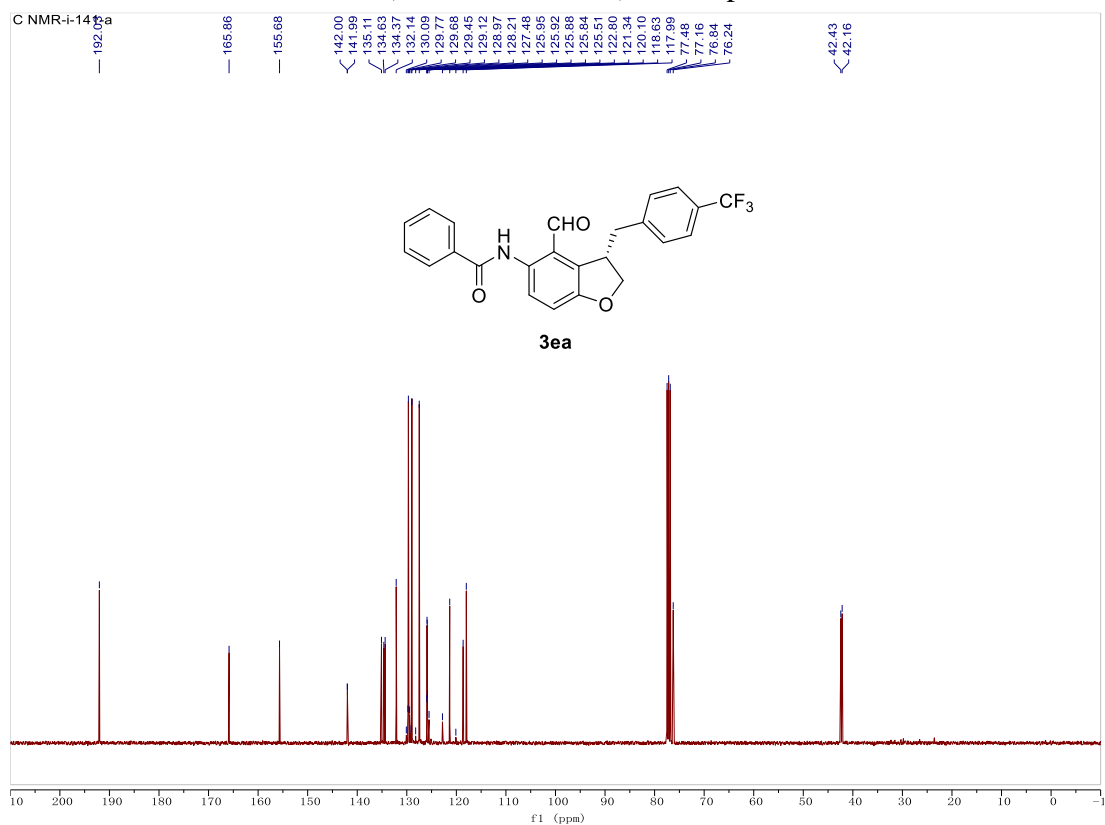

# HPLC spectra and data of compound 3ea

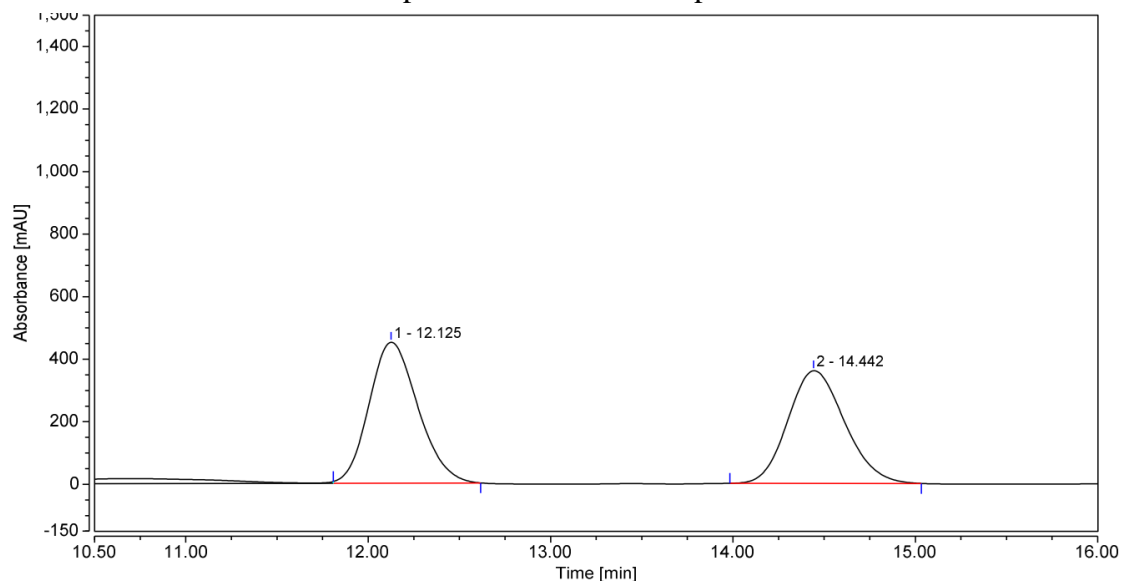

| Integration Results |           |                       |                 |               |                    |                      |                |
|---------------------|-----------|-----------------------|-----------------|---------------|--------------------|----------------------|----------------|
| No.                 | Peak Name | Retention Time<br>min | Area<br>mAU*min | Height<br>mAU | Relative Area<br>% | Relative Height<br>% | Amount<br>n.a. |
| 1                   |           | 12.125                | 139.705         | 450.592       | 51.78              | 55.58                | n.a.           |
| 2                   |           | 14.442                | 130.096         | 360.160       | 48.22              | 44.42                | n.a.           |
| Total:              |           |                       | 269.801         | 810.752       | 100.00             | 100.00               |                |

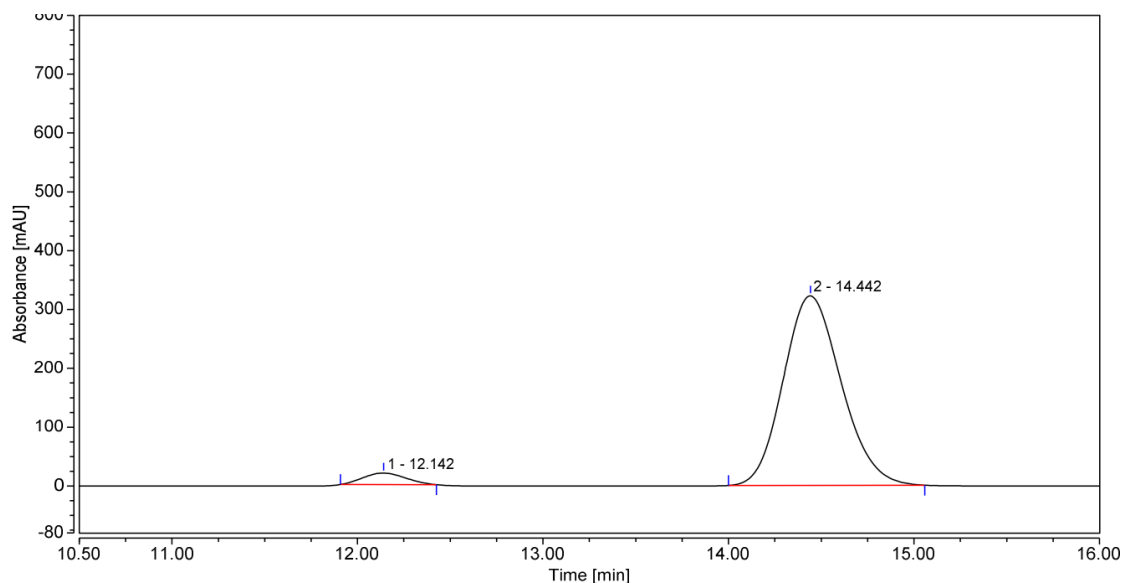

| Integration Results |           |                       |                 |               |                    |                      |                |
|---------------------|-----------|-----------------------|-----------------|---------------|--------------------|----------------------|----------------|
| No.                 | Peak Name | Retention Time<br>min | Area<br>mAU*min | Height<br>mAU | Relative Area<br>% | Relative Height<br>% | Amount<br>n.a. |
| 1                   |           | 12.142                | 5.175           | 19.557        | 4.25               | 5.73                 | n.a.           |
| 2                   |           | 14.442                | 116.563         | 321.998       | 95.75              | 94.27                | n.a.           |
| Total:              |           |                       | 121.738         | 341.556       | 100.00             | 100.00               |                |

<sup>1</sup>H NMR (400 MHz, CDCl<sub>3</sub>) of compound **3fa**

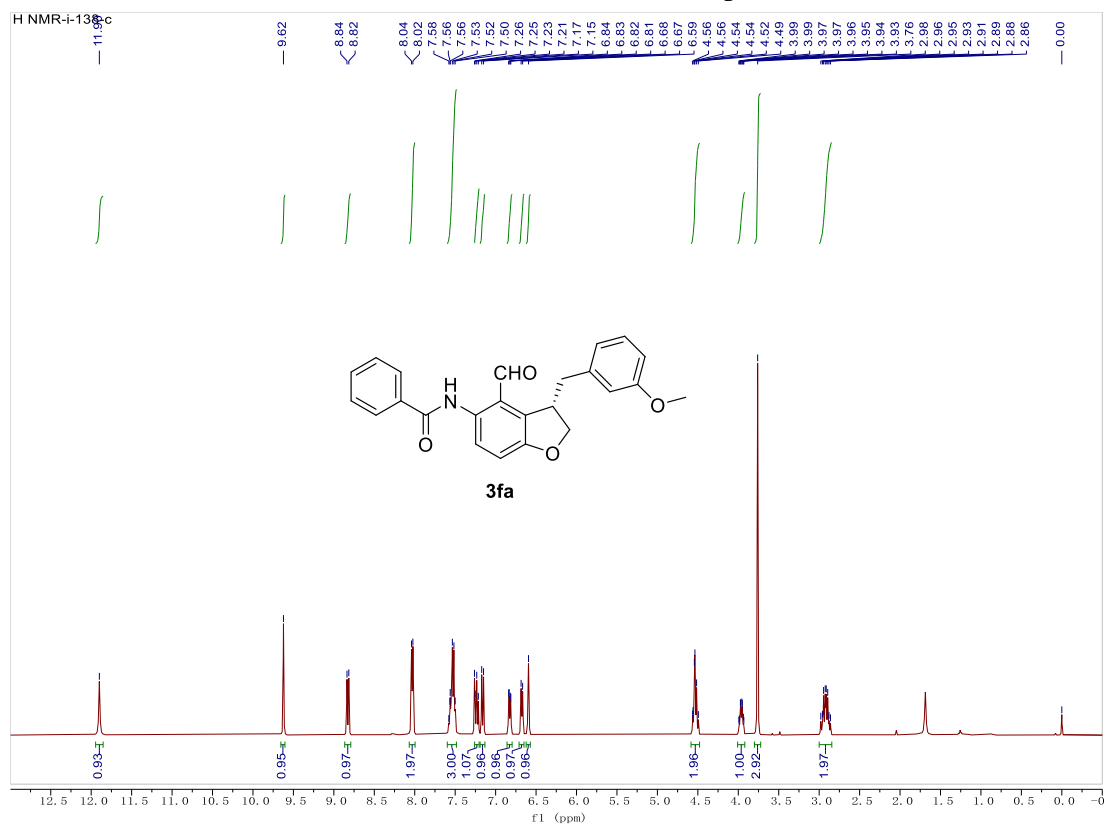

<sup>13</sup>C NMR (101 MHz, CDCl<sub>3</sub>) of compound **3fa**

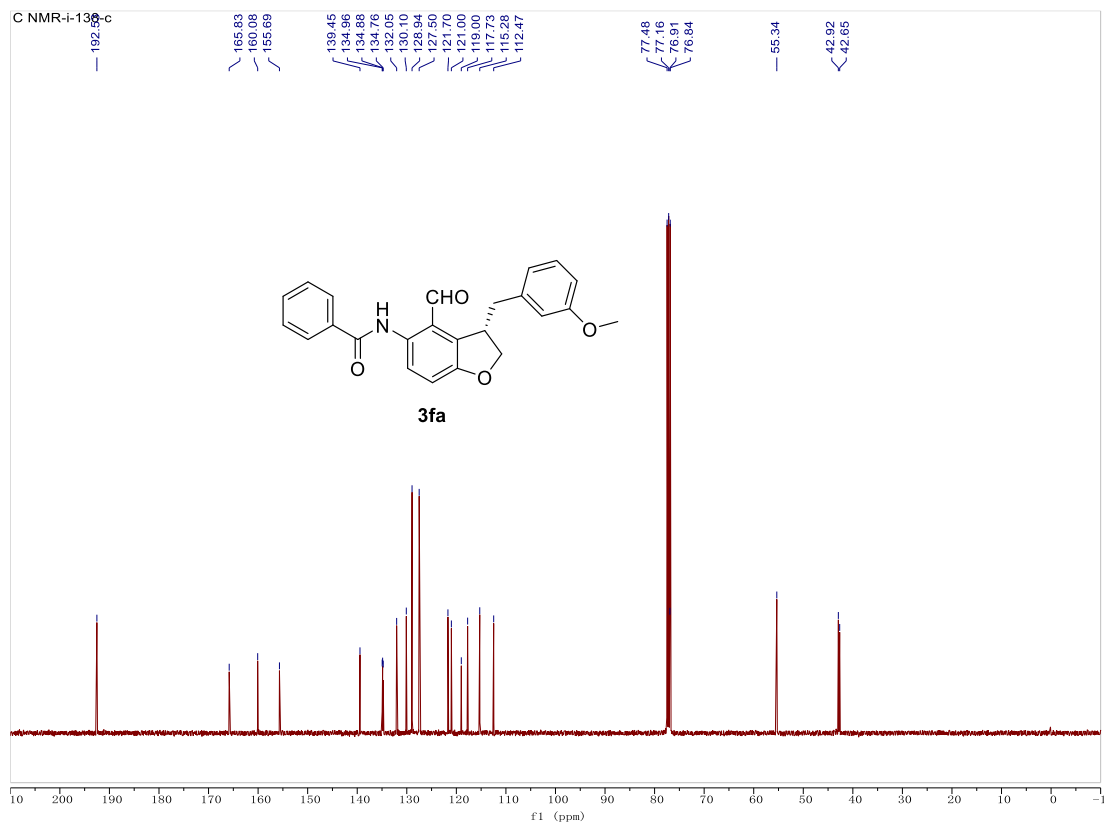

### HPLC spectra and data of compound **3fa**

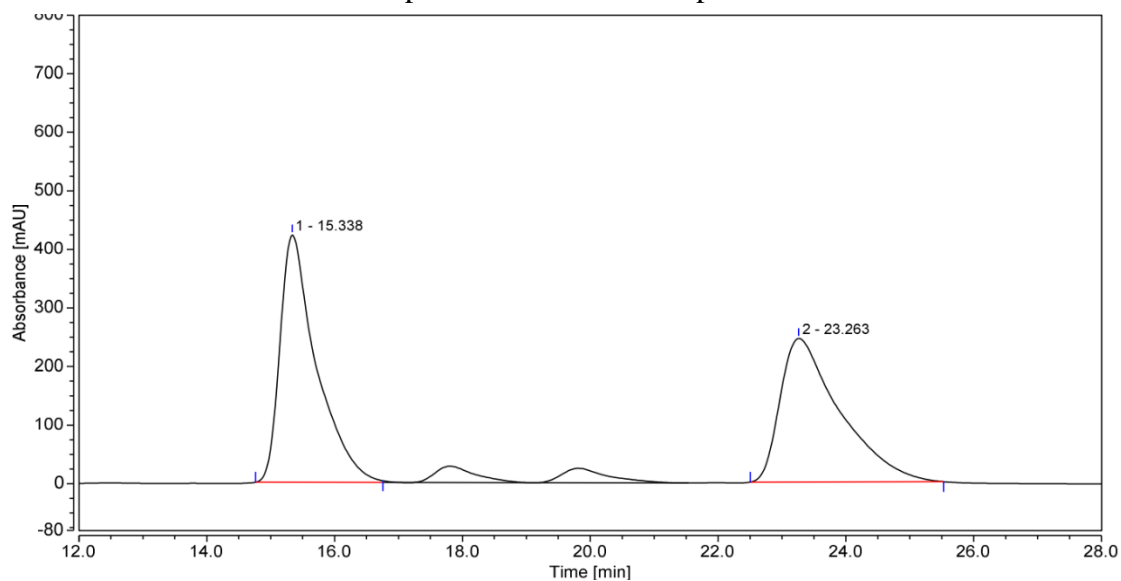

| Integration Results |           |                       |                 |               |                    |                      |                |
|---------------------|-----------|-----------------------|-----------------|---------------|--------------------|----------------------|----------------|
| No.                 | Peak Name | Retention Time<br>min | Area<br>mAU*min | Height<br>mAU | Relative Area<br>% | Relative Height<br>% | Amount<br>n.a. |
| 1                   |           | 15.338                | 277.842         | 422.398       | 51.27              | 63.28                | n.a.           |
| 2                   |           | 23.263                | 264.086         | 245.098       | 48.73              | 36.72                | n.a.           |
| Total:              |           |                       | 541.928         | 667.495       | 100.00             | 100.00               |                |

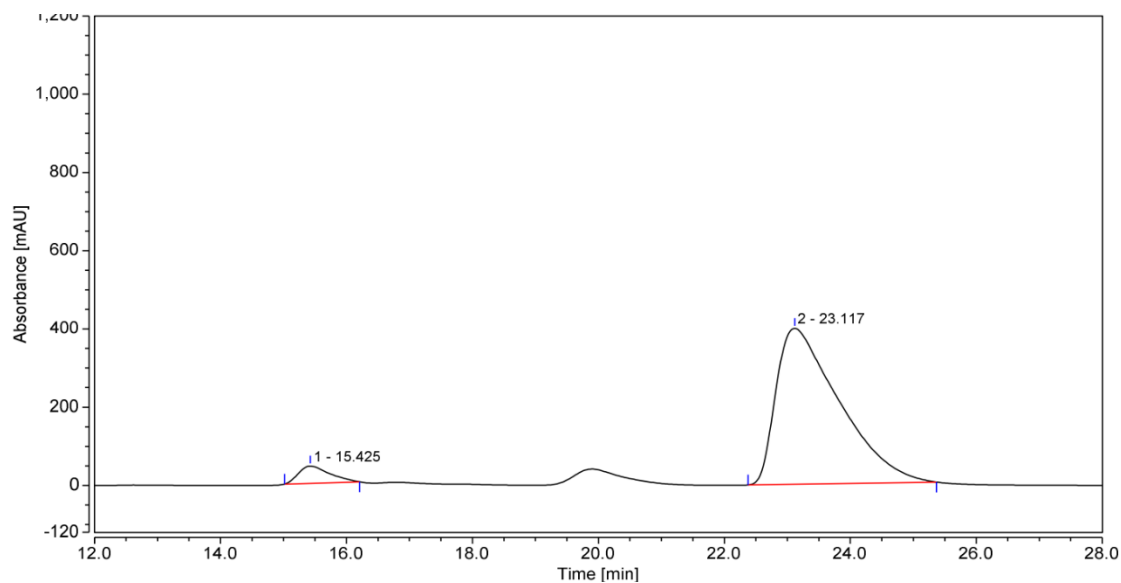

| Integration Results |           |                       |                 |               |                    |                      |                |
|---------------------|-----------|-----------------------|-----------------|---------------|--------------------|----------------------|----------------|
| No.                 | Peak Name | Retention Time<br>min | Area<br>mAU*min | Height<br>mAU | Relative Area<br>% | Relative Height<br>% | Amount<br>n.a. |
| 1                   |           | 15.425                | 25.213          | 44.203        | 5.17               | 9.98                 | n.a.           |
| 2                   |           | 23.117                | 462.478         | 398.785       | 94.83              | 90.02                | n.a.           |
| Total:              |           |                       | 487.691         | 442.988       | 100.00             | 100.00               |                |

<sup>1</sup>H NMR (400 MHz, CDCl<sub>3</sub>) of compound **3ga**

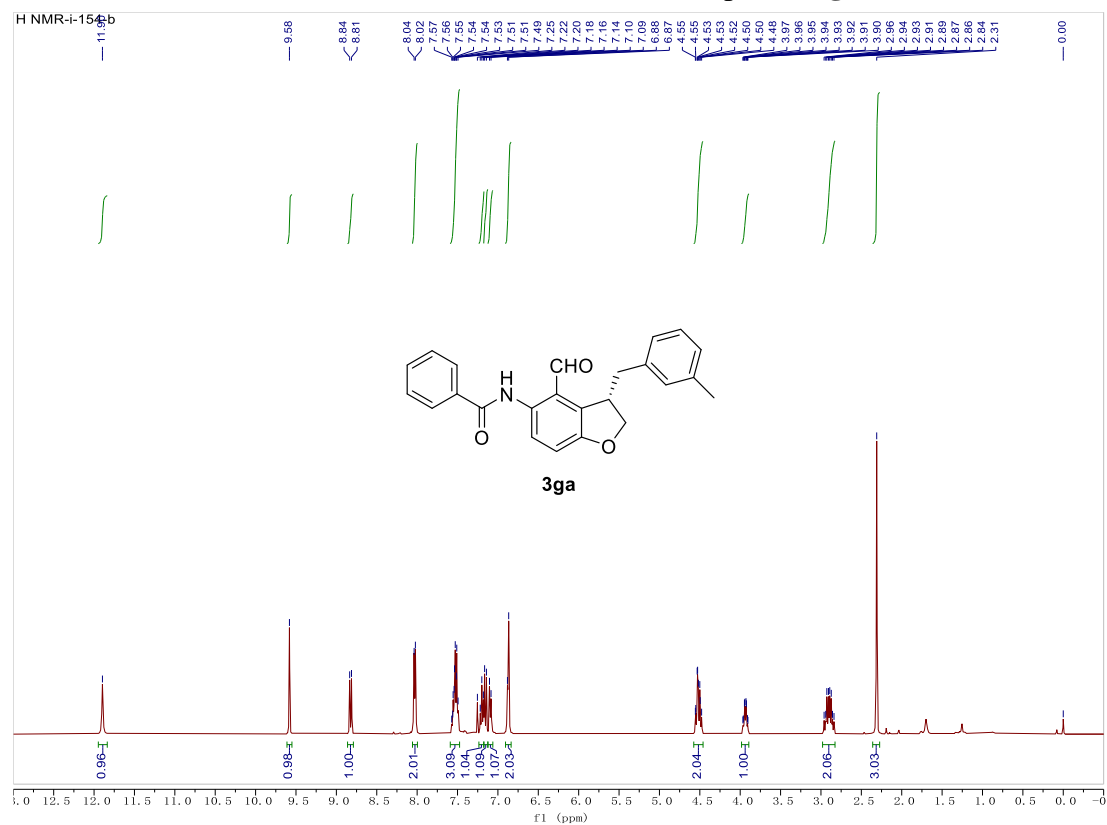

<sup>13</sup>C NMR (101 MHz, CDCl<sub>3</sub>) of compound **3ga**

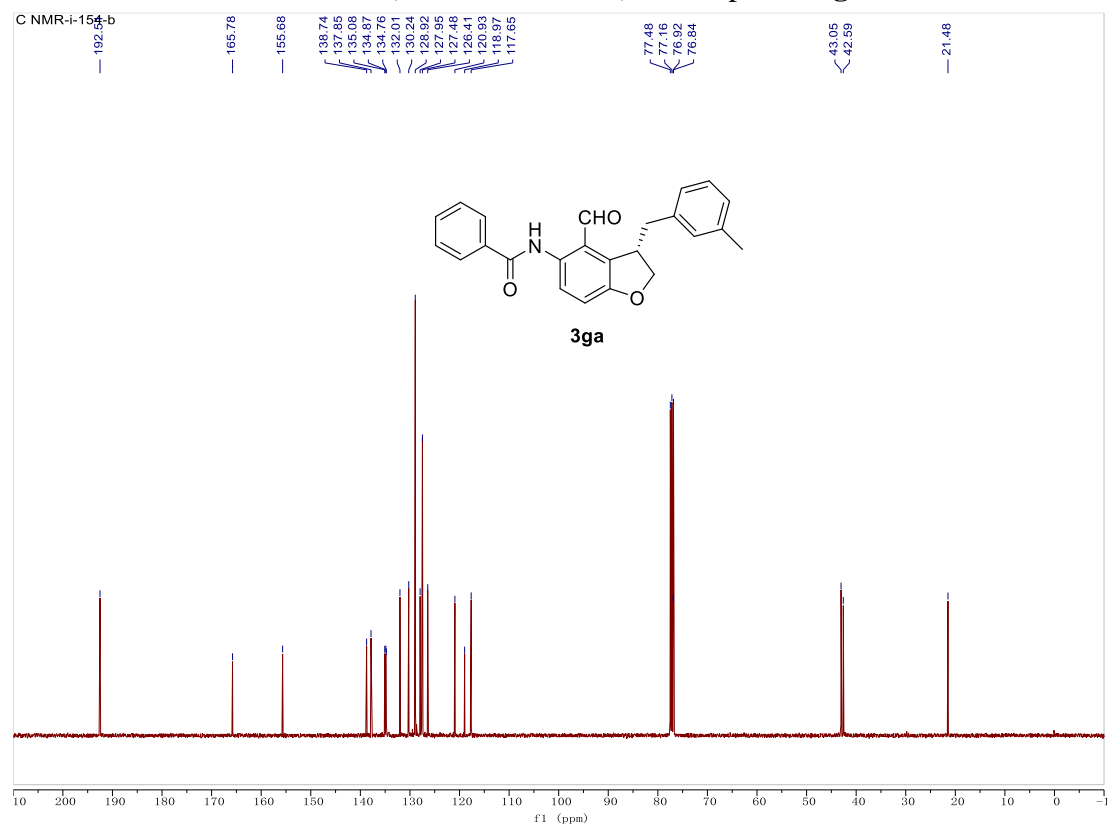

### HPLC spectra and data of compound **3ga**

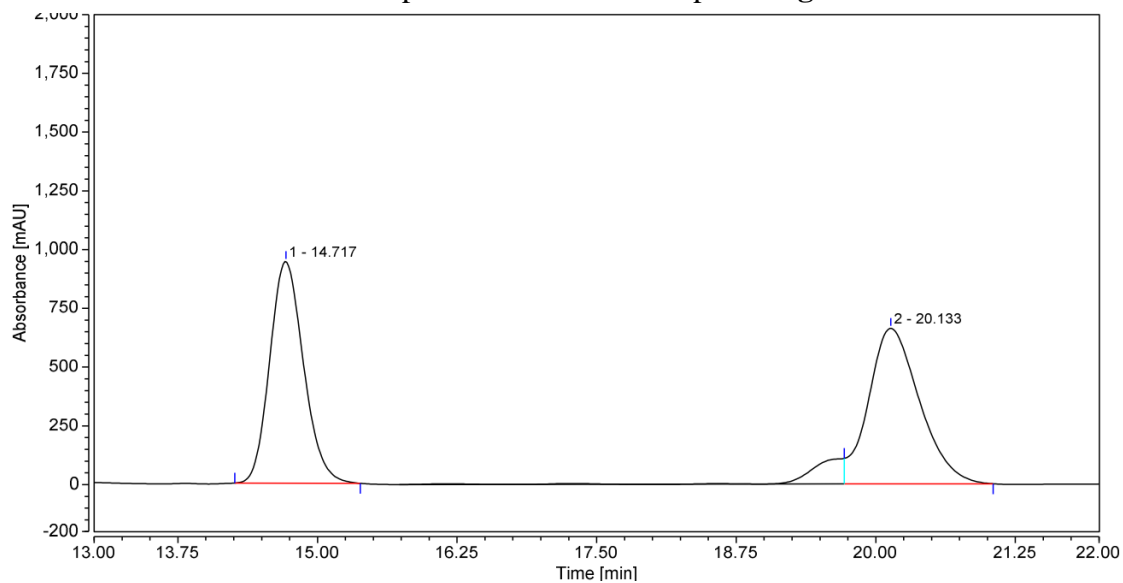

| Integration Results |           |                       |                 |               |                    |                      |                |
|---------------------|-----------|-----------------------|-----------------|---------------|--------------------|----------------------|----------------|
| No.                 | Peak Name | Retention Time<br>min | Area<br>mAU*min | Height<br>mAU | Relative Area<br>% | Relative Height<br>% | Amount<br>n.a. |
| 1                   |           | 14.717                | 330.875         | 943.252       | 48.56              | 58.75                | n.a.           |
| 2                   |           | 20.133                | 350.475         | 662.188       | 51.44              | 41.25                | n.a.           |
| Total:              |           |                       | 681.350         | 1605.441      | 100.00             | 100.00               |                |

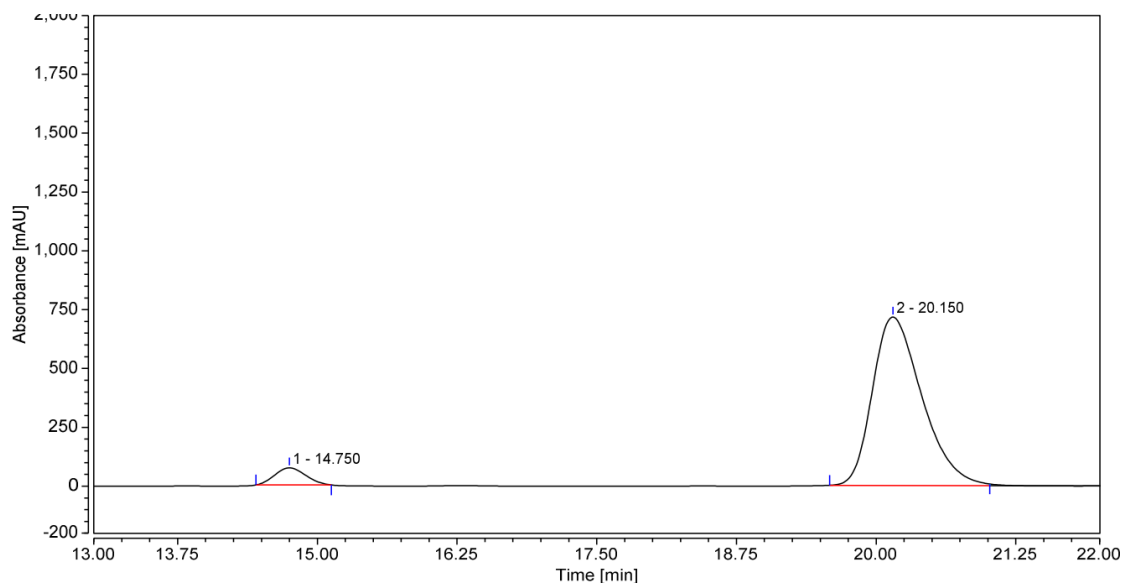

| Integration Results |           |                       |                 |               |                    |                      |                |
|---------------------|-----------|-----------------------|-----------------|---------------|--------------------|----------------------|----------------|
| No.                 | Peak Name | Retention Time<br>min | Area<br>mAU*min | Height<br>mAU | Relative Area<br>% | Relative Height<br>% | Amount<br>n.a. |
| 1                   |           | 14.750                | 23.125          | 72.336        | 5.93               | 9.18                 | n.a.           |
| 2                   |           | 20.150                | 366.630         | 715.564       | 94.07              | 90.82                | n.a.           |
| Total:              |           |                       | 389.756         | 787.900       | 100.00             | 100.00               |                |

<sup>1</sup>H NMR (400 MHz, CDCl<sub>3</sub>) of compound **3ha**

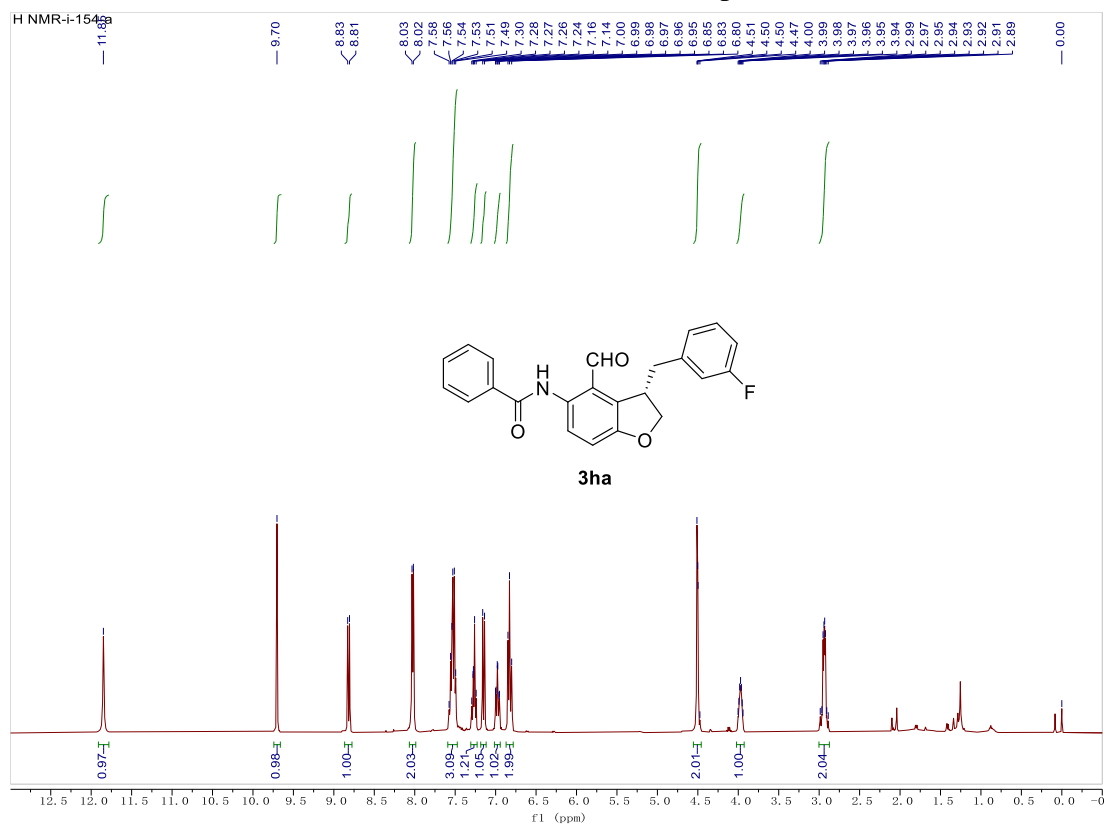

<sup>13</sup>C NMR (101 MHz, CDCl<sub>3</sub>) of compound **3ha**

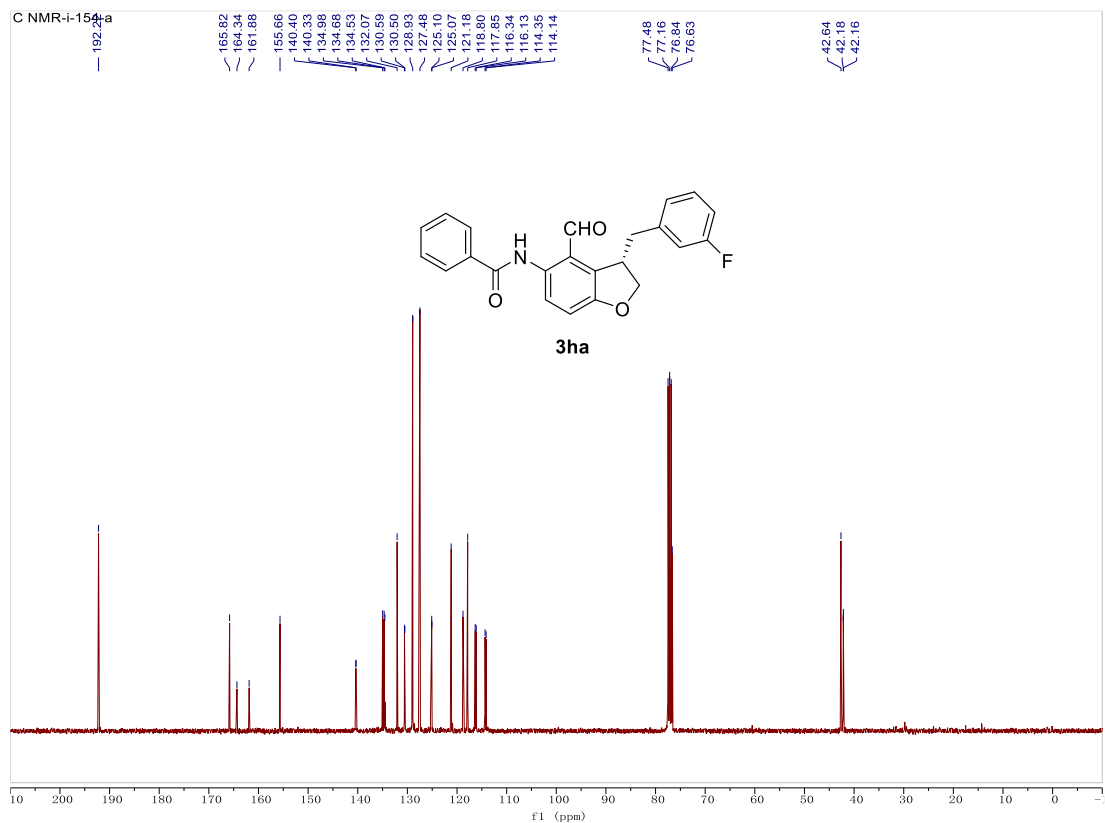

# HPLC spectra and data of compound **3ha**

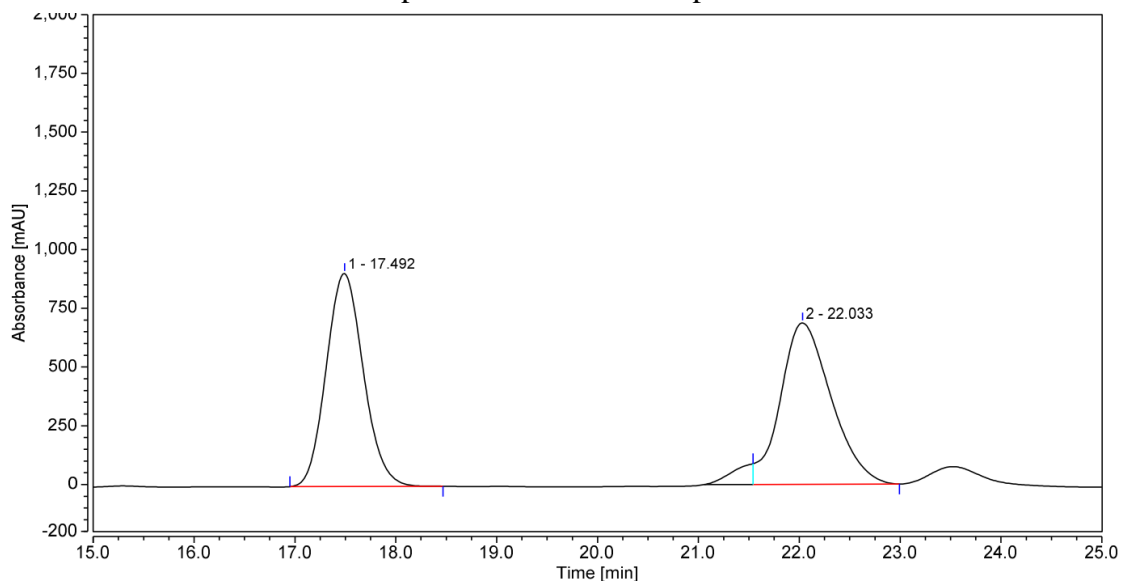

| Integration Results |           |                       |                 |               |                    |                      |                |
|---------------------|-----------|-----------------------|-----------------|---------------|--------------------|----------------------|----------------|
| No.                 | Peak Name | Retention Time<br>min | Area<br>mAU*min | Height<br>mAU | Relative Area<br>% | Relative Height<br>% | Amount<br>n.a. |
| 1                   |           | 17.492                | 387.043         | 906.498       | 49.18              | 56.88                | n.a.           |
| 2                   |           | 22.033                | 400.011         | 687.087       | 50.82              | 43.12                | n.a.           |
| Total:              |           |                       | 787.053         | 1593.585      | 100.00             | 100.00               |                |

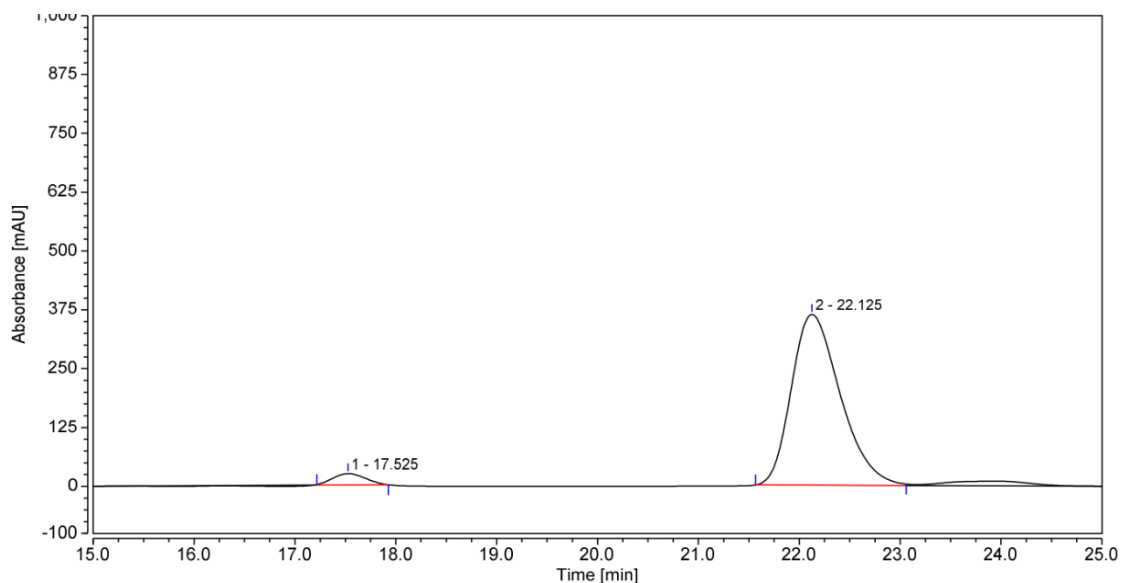

| Integration Results |           |                       |                 |               |                    |                      |                |
|---------------------|-----------|-----------------------|-----------------|---------------|--------------------|----------------------|----------------|
| No.                 | Peak Name | Retention Time<br>min | Area<br>mAU*min | Height<br>mAU | Relative Area<br>% | Relative Height<br>% | Amount<br>n.a. |
| 1                   |           | 17.525                | 9.001           | 24.057        | 4.23               | 6.22                 | n.a.           |
| 2                   |           | 22.125                | 203.593         | 362.767       | 95.77              | 93.78                | n.a.           |
| Total:              |           |                       | 212.594         | 386.824       | 100.00             | 100.00               |                |

<sup>1</sup>H NMR (400 MHz, CDCl<sub>3</sub>) of compound **3ia**

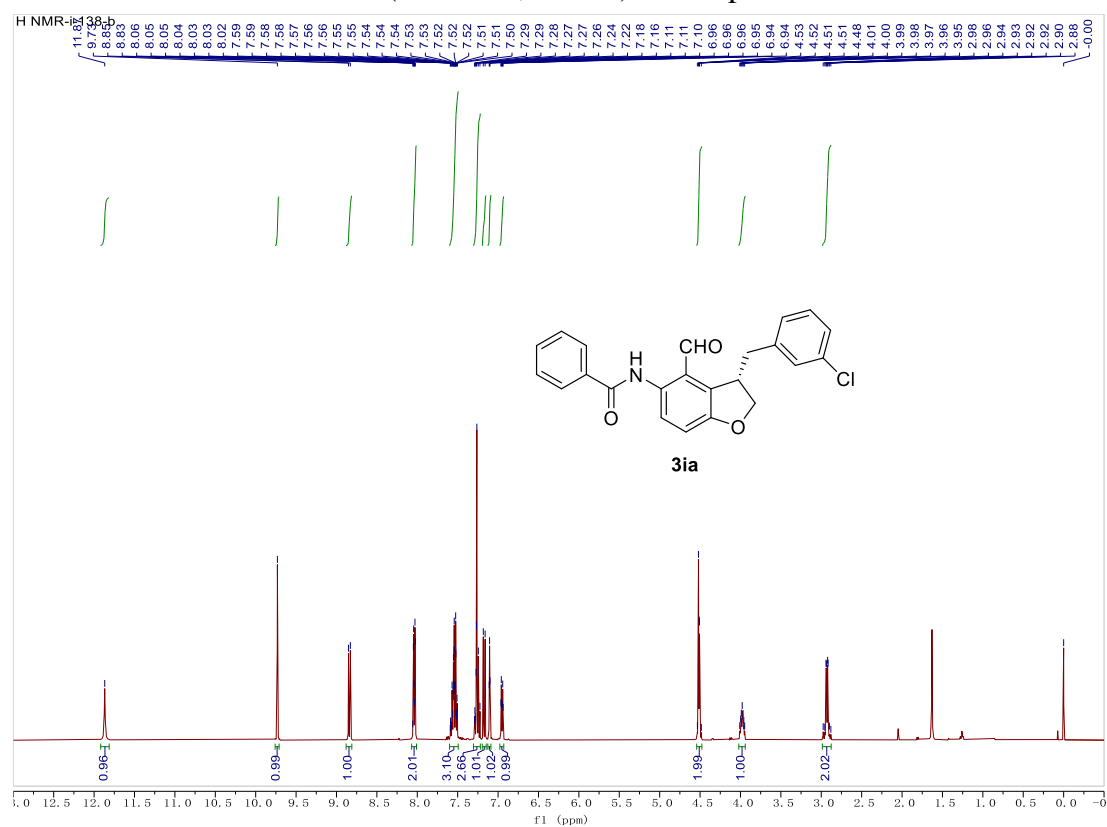

<sup>13</sup>C NMR (101 MHz, CDCl<sub>3</sub>) of compound **3ia**

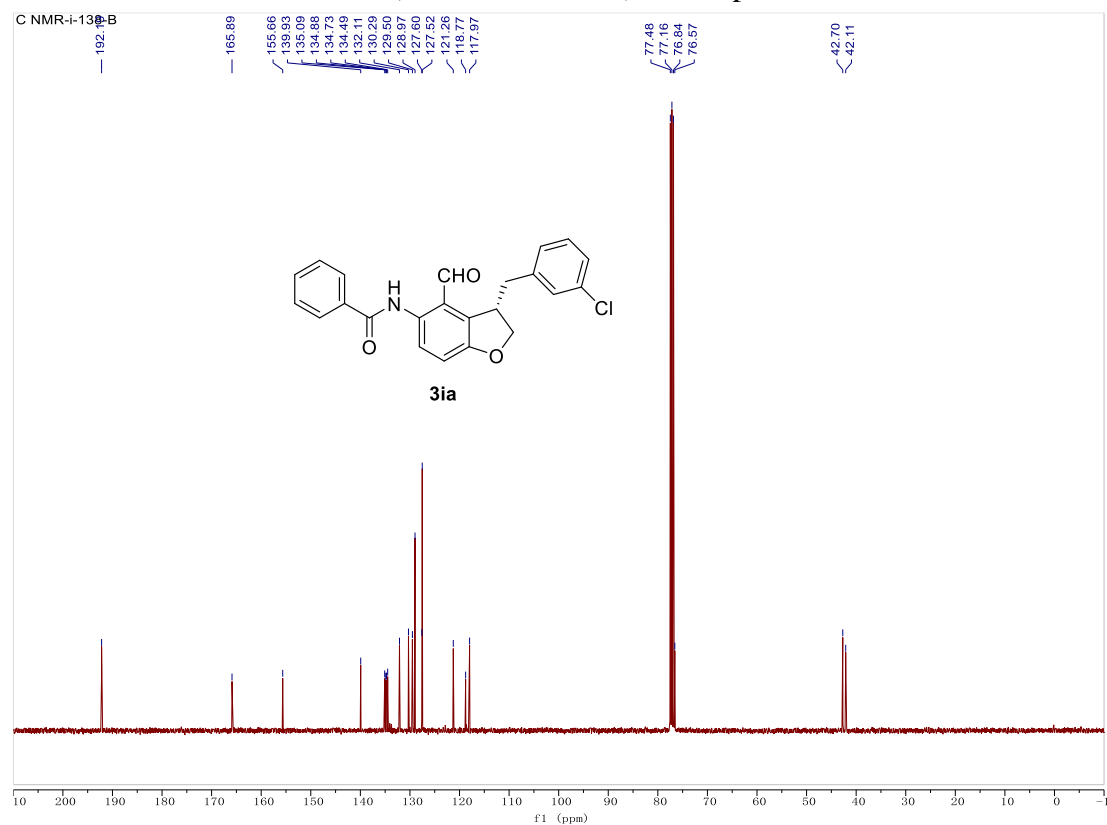

# HPLC spectra and data of compound 3ia

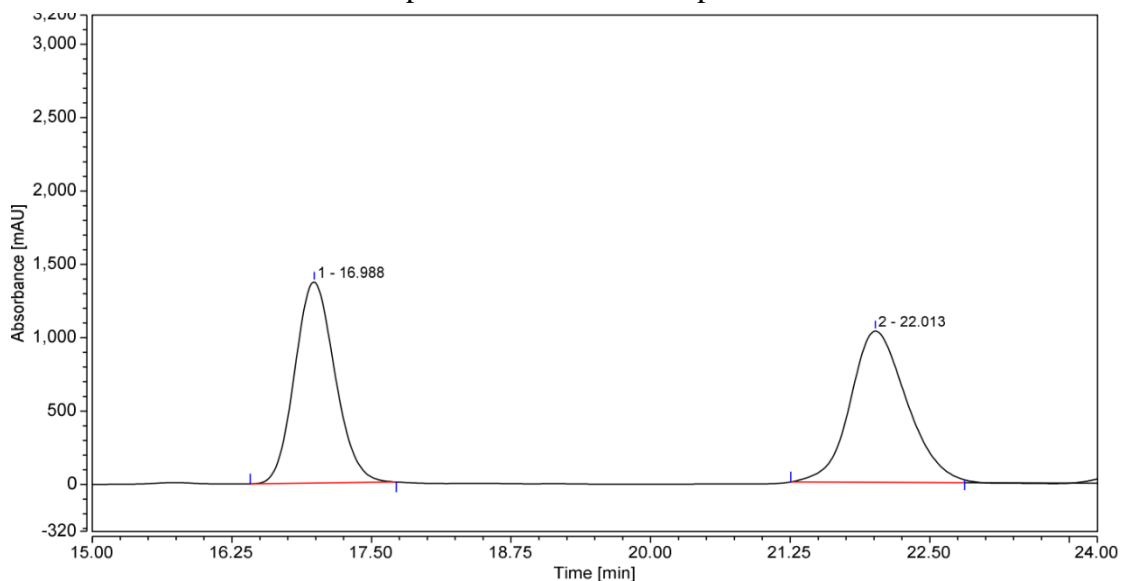

| Integration Results |           |                       |                 |               |                    |                      |                |
|---------------------|-----------|-----------------------|-----------------|---------------|--------------------|----------------------|----------------|
| No.                 | Peak Name | Retention Time<br>min | Area<br>mAU*min | Height<br>mAU | Relative Area<br>% | Relative Height<br>% | Amount<br>n.a. |
| 1                   |           | 16.988                | 571.887         | 1370.680      | 48.63              | 57.07                | n.a.           |
| 2                   |           | 22.013                | 604.078         | 1031.095      | 51.37              | 42.93                | n.a.           |
| Total:              |           |                       | 1175.965        | 2401.775      | 100.00             | 100.00               |                |

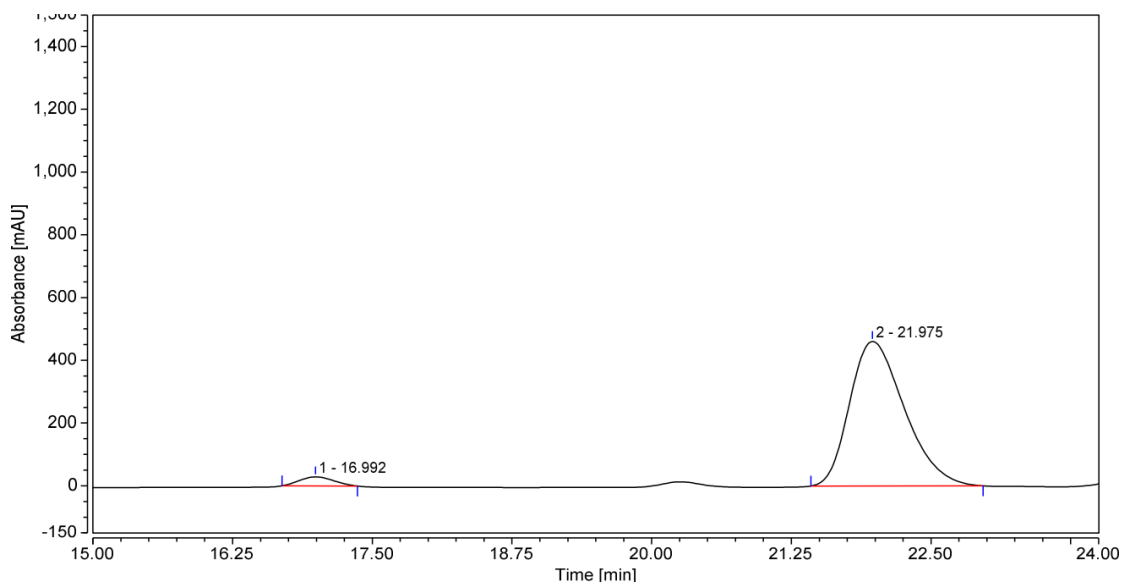

| Integration Results |           |                       |                 |               |                    |                      |                |
|---------------------|-----------|-----------------------|-----------------|---------------|--------------------|----------------------|----------------|
| No.                 | Peak Name | Retention Time<br>min | Area<br>mAU*min | Height<br>mAU | Relative Area<br>% | Relative Height<br>% | Amount<br>n.a. |
| 1                   |           | 16.992                | 10.167          | 28.675        | 3.74               | 5.86                 | n.a.           |
| 2                   |           | 21.975                | 261.822         | 460.653       | 96.26              | 94.14                | n.a.           |
| Total:              |           |                       | 271.989         | 489.328       | 100.00             | 100.00               |                |

<sup>1</sup>H NMR (400 MHz, CDCl<sub>3</sub>) of compound **3ja**

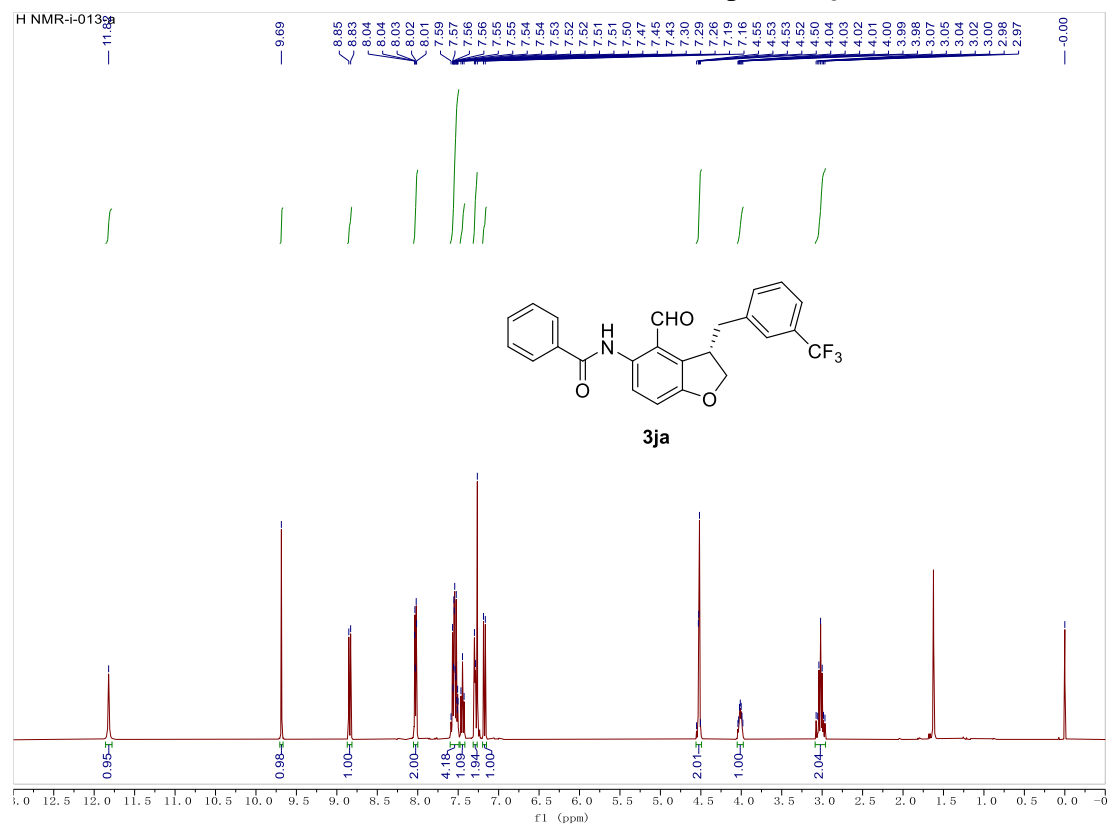

<sup>13</sup>C NMR (101 MHz, CDCl<sub>3</sub>) of compound **3ja**

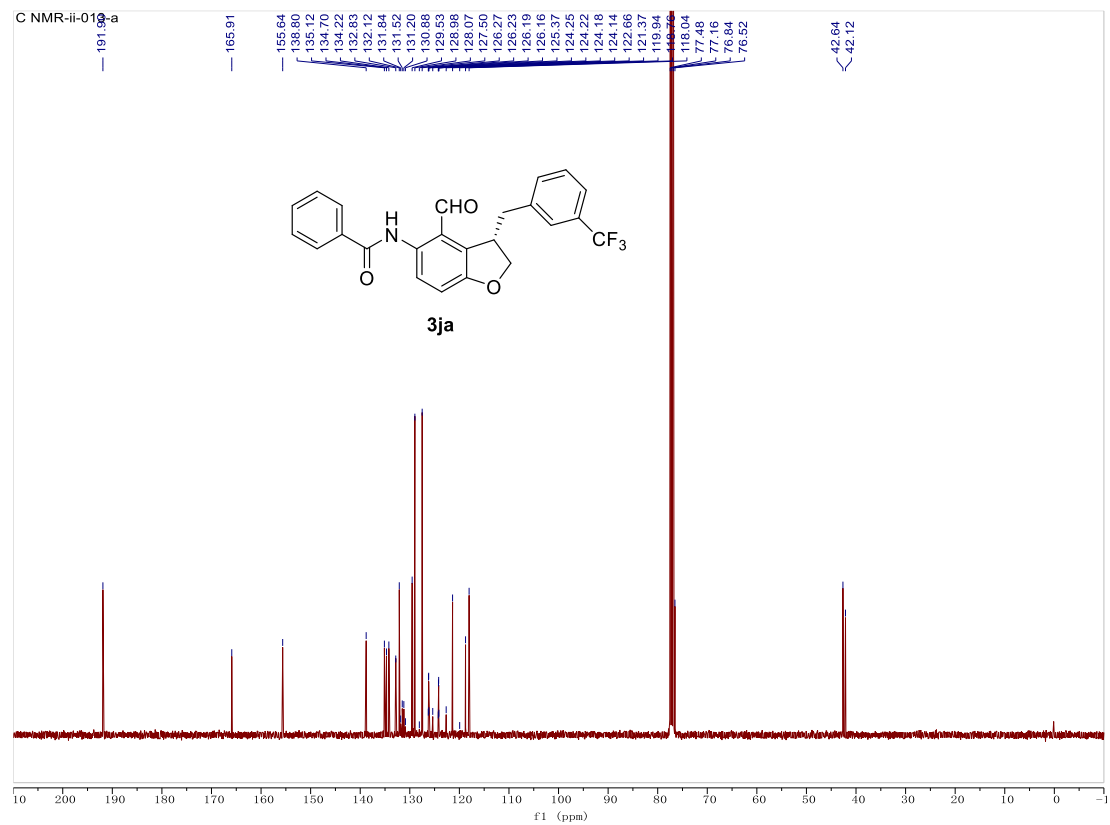

# HPLC spectra and data of compound **3ja**

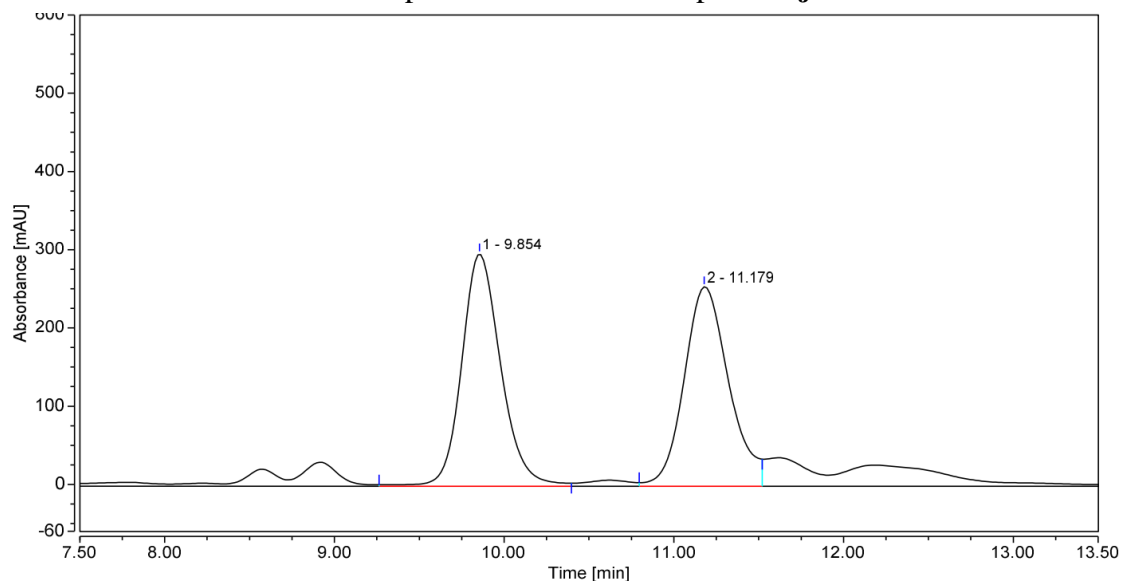

| Integration Results |           |                       |                 |               |                    |                      |                |
|---------------------|-----------|-----------------------|-----------------|---------------|--------------------|----------------------|----------------|
| No.                 | Peak Name | Retention Time<br>min | Area<br>mAU*min | Height<br>mAU | Relative Area<br>% | Relative Height<br>% | Amount<br>n.a. |
| 1                   |           | 9.854                 | 79.259          | 296.887       | 50.60              | 53.81                | n.a.           |
| 2                   |           | 11.179                | 77.374          | 254.850       | 49.40              | 46.19                | n.a.           |
| Total:              |           |                       | 156.633         | 551.737       | 100.00             | 100.00               |                |

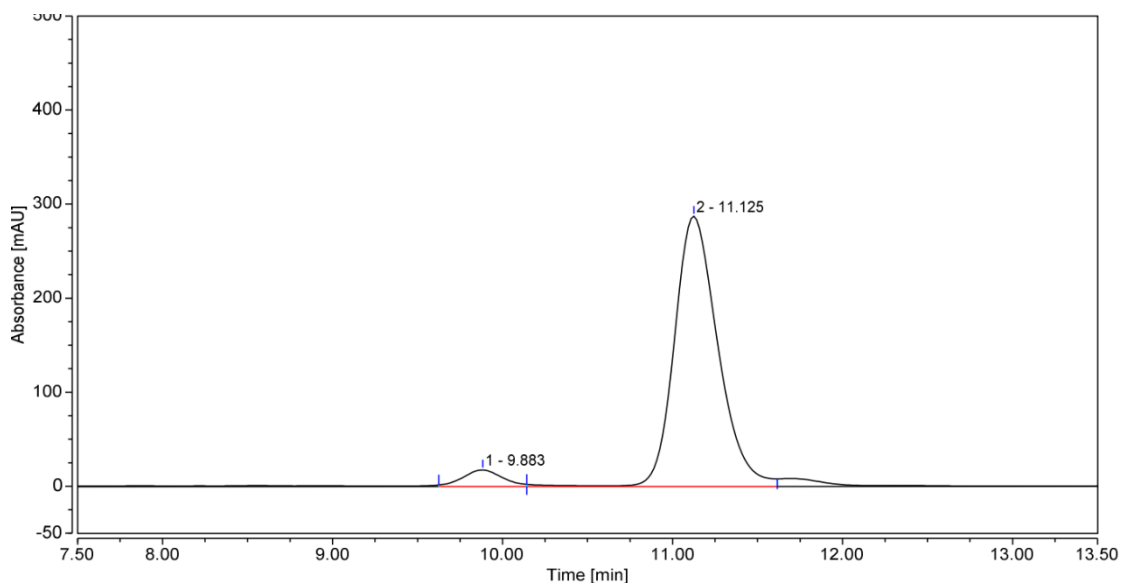

| Integration Results |           |                       |                 |               |                    |                      |                |
|---------------------|-----------|-----------------------|-----------------|---------------|--------------------|----------------------|----------------|
| No.                 | Peak Name | Retention Time<br>min | Area<br>mAU*min | Height<br>mAU | Relative Area<br>% | Relative Height<br>% | Amount<br>n.a. |
| 1                   |           | 9.883                 | 4.761           | 17.649        | 5.30               | 5.79                 | n.a.           |
| 2                   |           | 11.125                | 85.062          | 287.325       | 94.70              | 94.21                | n.a.           |
| Total:              |           |                       | 89.823          | 304.974       | 100.00             | 100.00               |                |

<sup>1</sup>H NMR (400 MHz, CDCl<sub>3</sub>) of compound **3ka**

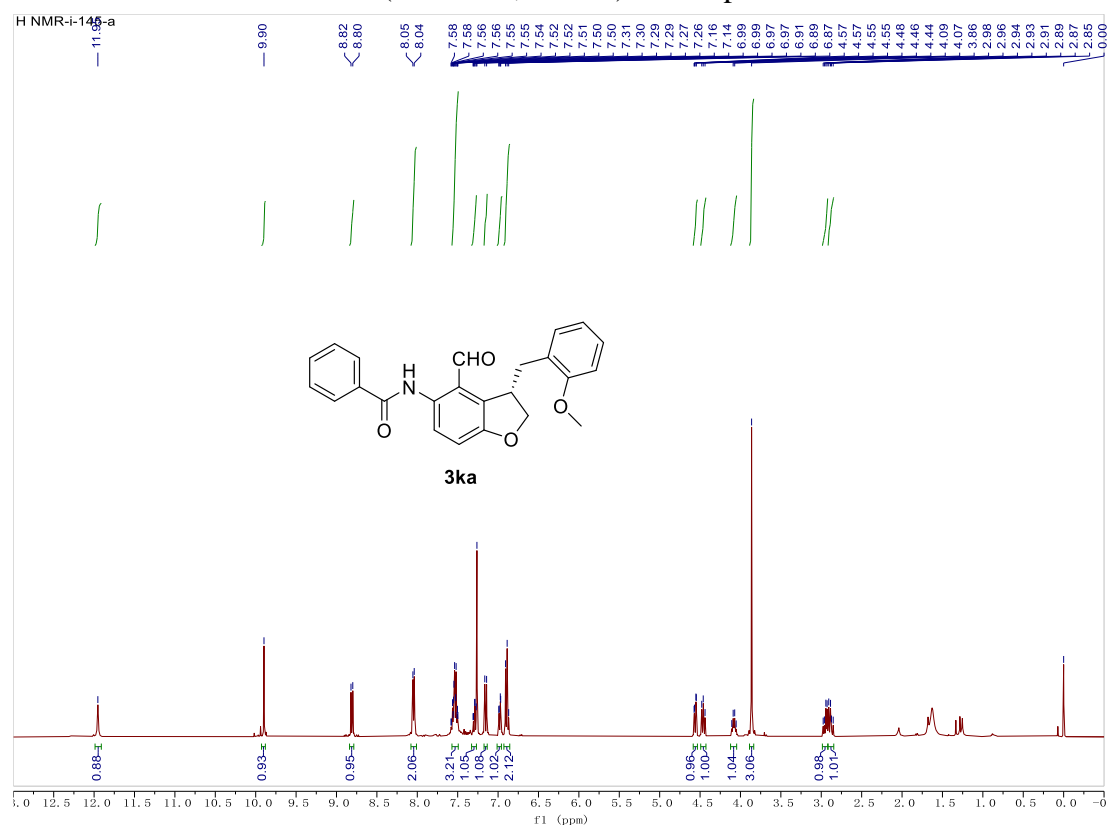

<sup>13</sup>C NMR (101 MHz, CDCl<sub>3</sub>) of compound **3ka**

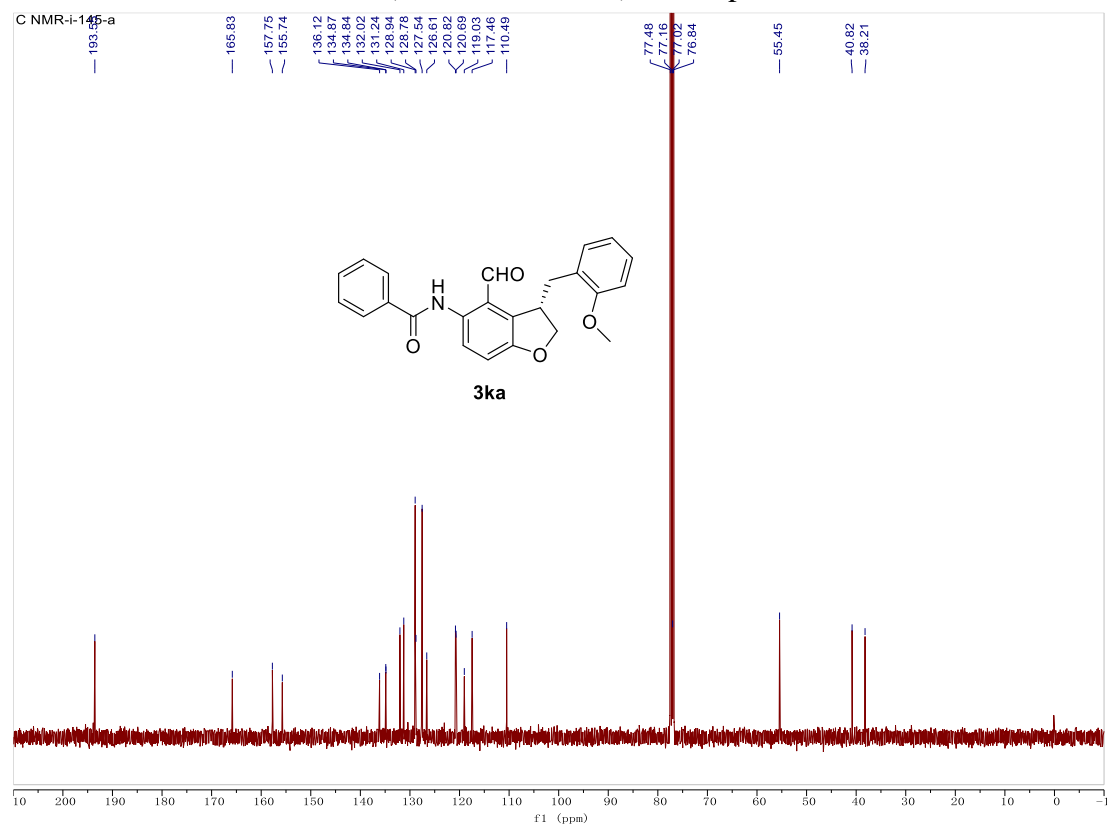

# HPLC spectra and data of compound 3ka

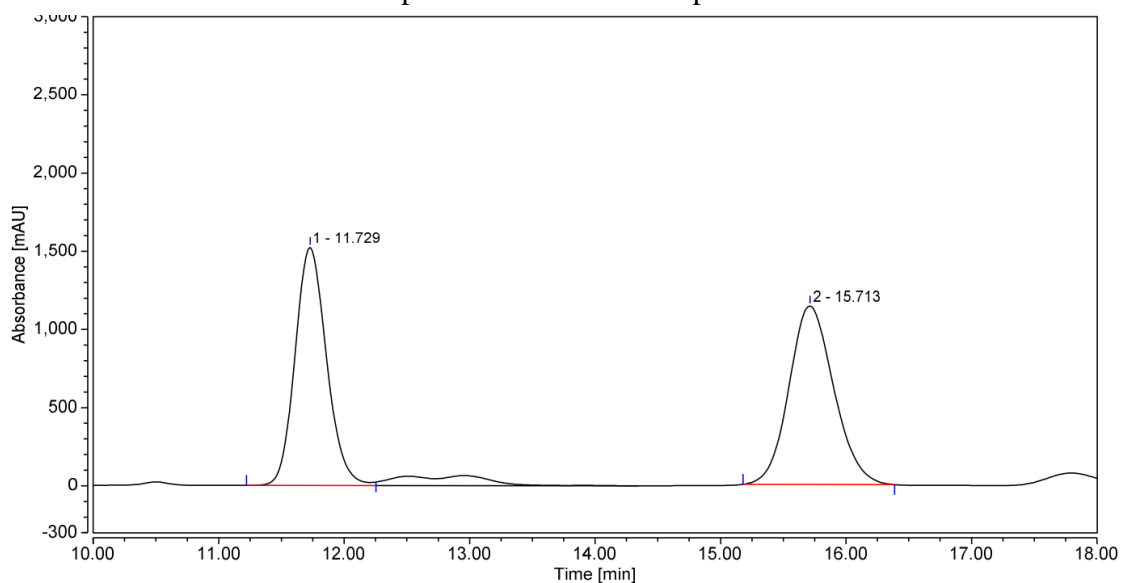

| Integration Results |           |                       |                 |               |                    |                      |                |
|---------------------|-----------|-----------------------|-----------------|---------------|--------------------|----------------------|----------------|
| No.                 | Peak Name | Retention Time<br>min | Area<br>mAU*min | Height<br>mAU | Relative Area<br>% | Relative Height<br>% | Amount<br>n.a. |
| 1                   |           | 11.729                | 443.361         | 1522.172      | 48.45              | 57.14                | n.a.           |
| 2                   |           | 15.713                | 471.786         | 1141.837      | 51.55              | 42.86                | n.a.           |
| Total:              |           |                       | 915.147         | 2664.009      | 100.00             | 100.00               |                |

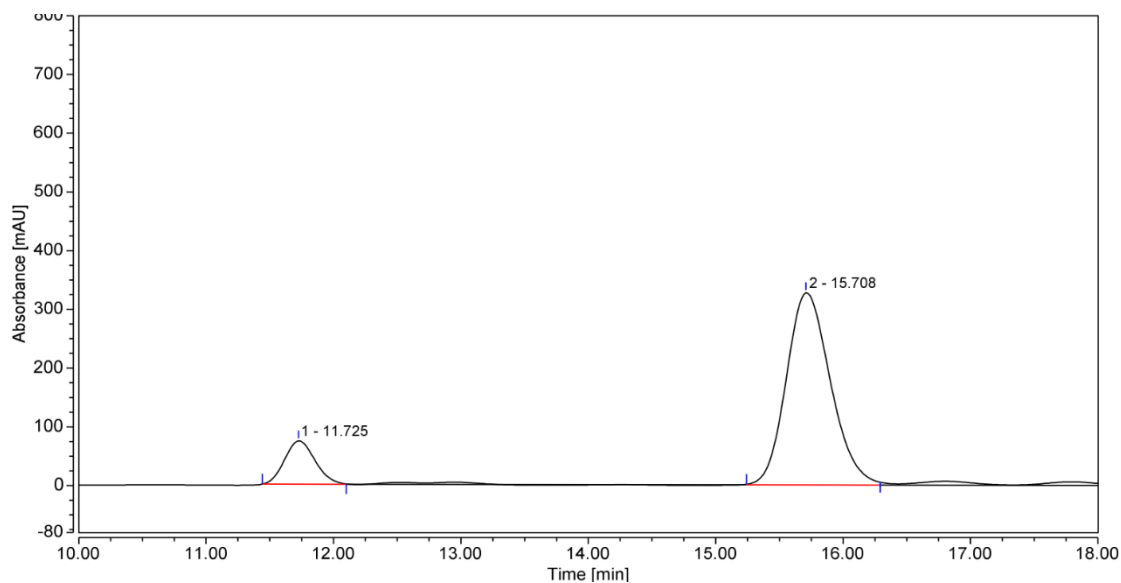

| Integration Results |           |                       |                 |               |                    |                      |                |
|---------------------|-----------|-----------------------|-----------------|---------------|--------------------|----------------------|----------------|
| No.                 | Peak Name | Retention Time<br>min | Area<br>mAU*min | Height<br>mAU | Relative Area<br>% | Relative Height<br>% | Amount<br>n.a. |
| 1                   |           | 11.725                | 20.393          | 73.738        | 13.48              | 18.39                | n.a.           |
| 2                   |           | 15.708                | 130.873         | 327.285       | 86.52              | 81.61                | n.a.           |
| Total:              |           |                       | 151.266         | 401.024       | 100.00             | 100.00               |                |

<sup>1</sup>H NMR (400 MHz, CDCl<sub>3</sub>) of compound **3la**

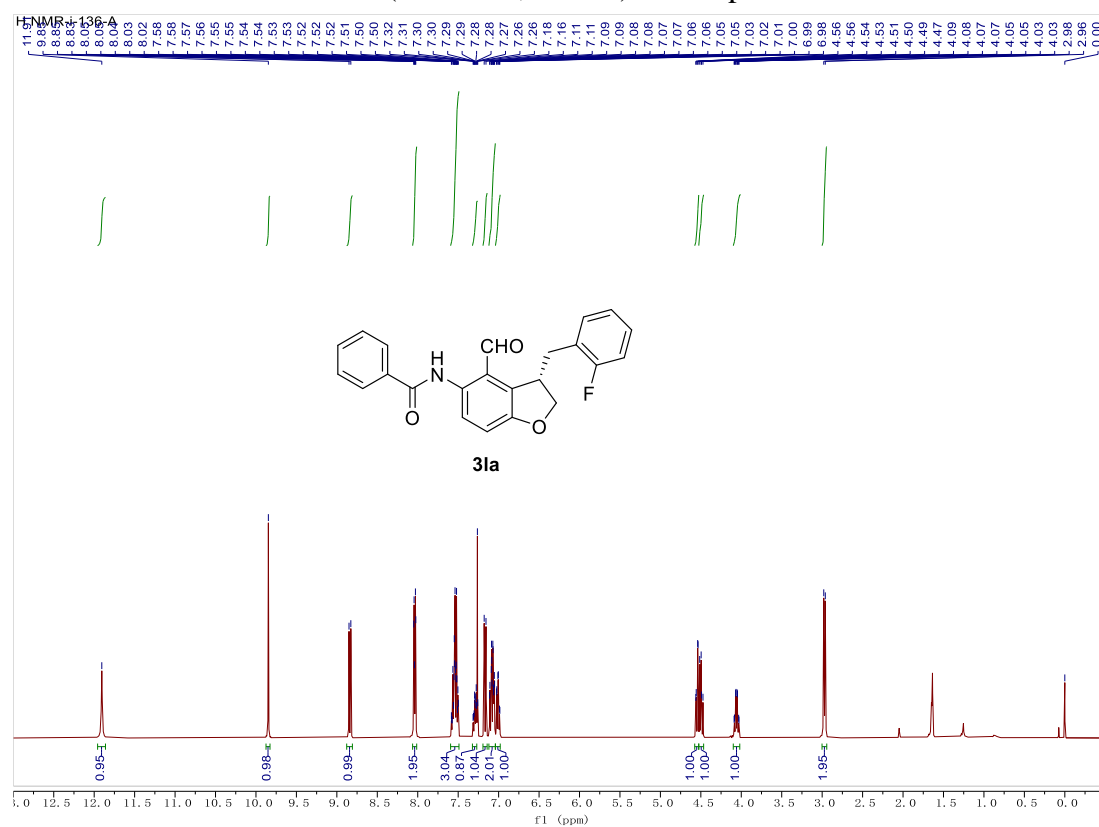

<sup>13</sup>C NMR (101 MHz, CDCl<sub>3</sub>) of compound **3la**

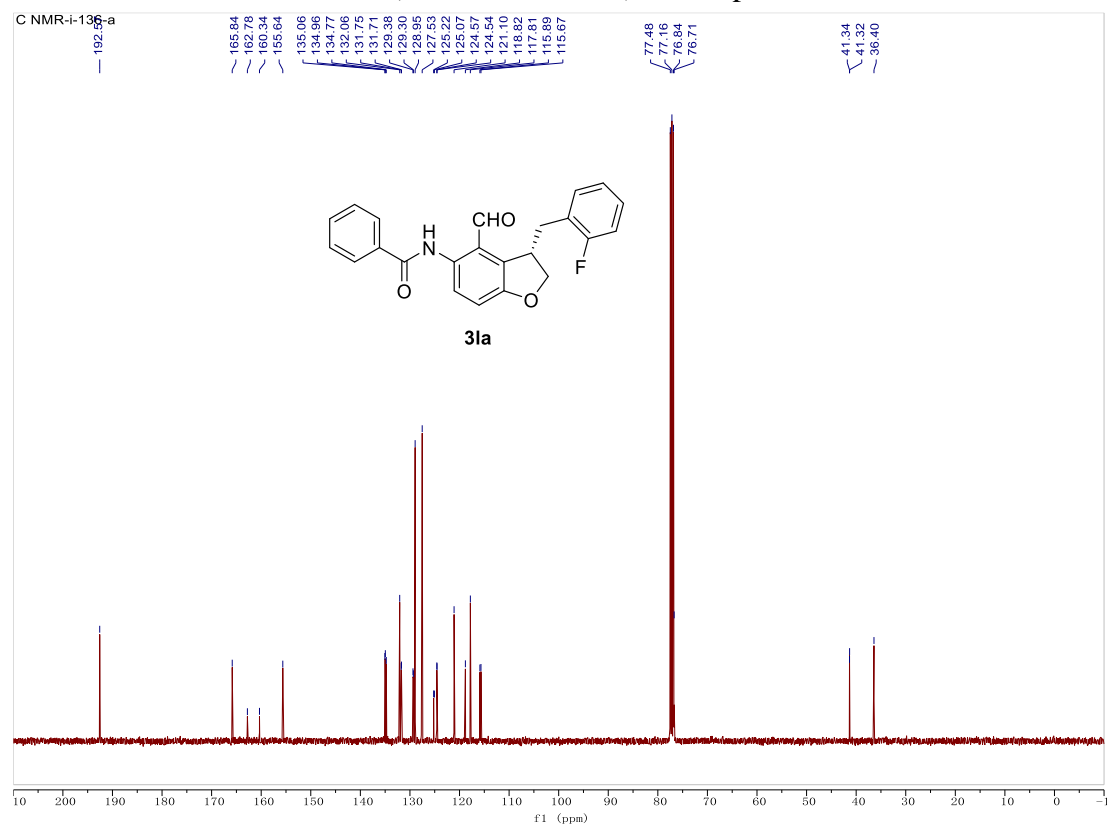

# HPLC spectra and data of compound 3la

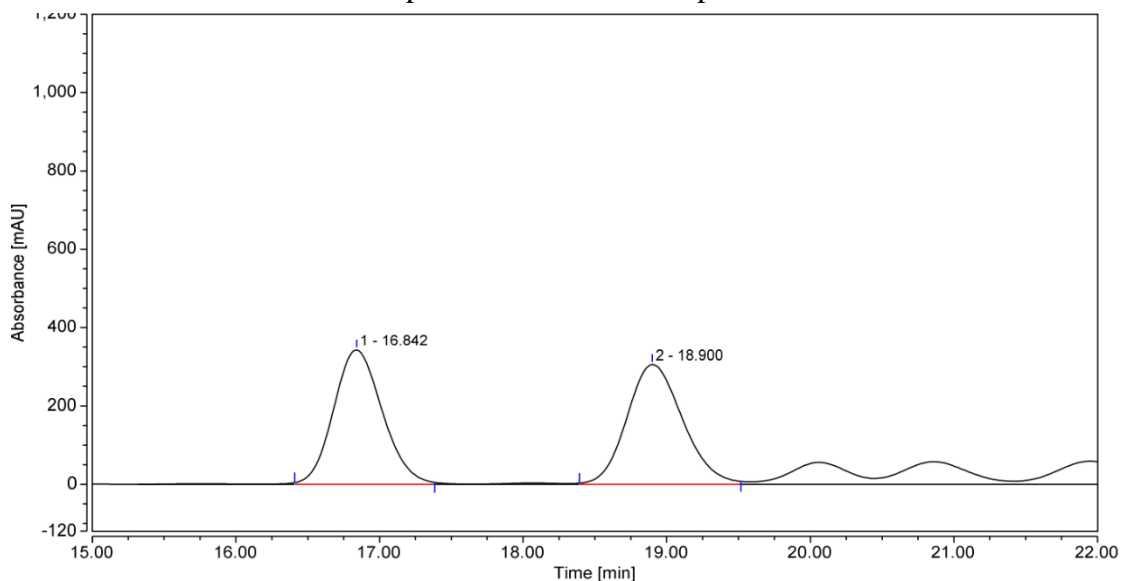

| Integration Results |           |                       |                 |               |                    |                      |                |
|---------------------|-----------|-----------------------|-----------------|---------------|--------------------|----------------------|----------------|
| No.                 | Peak Name | Retention Time<br>min | Area<br>mAU*min | Height<br>mAU | Relative Area<br>% | Relative Height<br>% | Amount<br>n.a. |
| 1                   |           | 16.842                | 134.577         | 342.855       | 49.48              | 52.86                | n.a.           |
| 2                   |           | 18.900                | 137.390         | 305.804       | 50.52              | 47.14                | n.a.           |
| Total:              |           |                       | 271.967         | 648.660       | 100.00             | 100.00               |                |

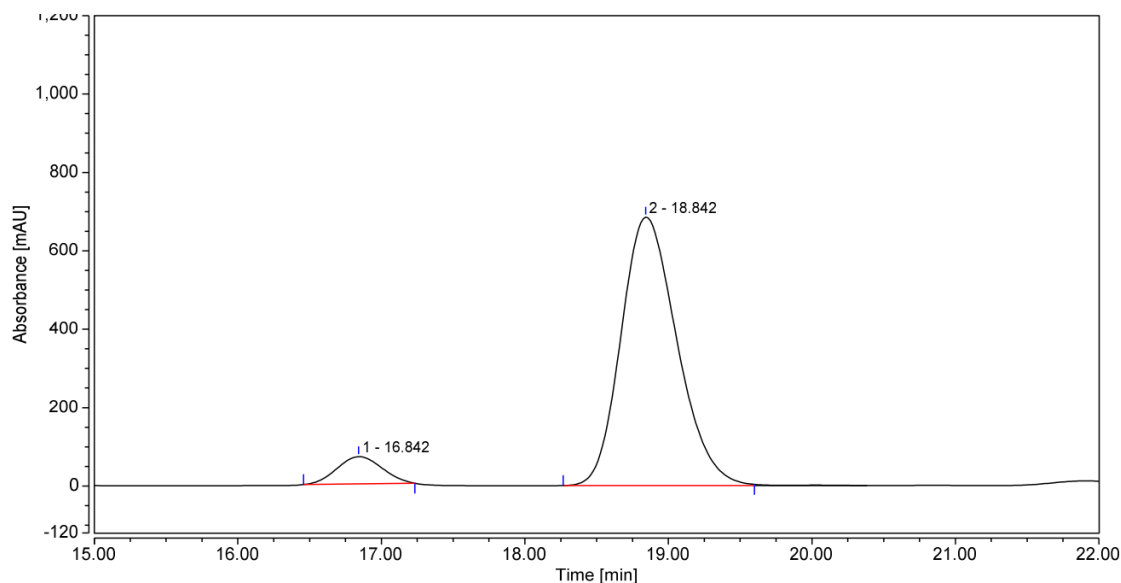

| Integration Results |           |                       |                 |               |                    |                      |                |
|---------------------|-----------|-----------------------|-----------------|---------------|--------------------|----------------------|----------------|
| No.                 | Peak Name | Retention Time<br>min | Area<br>mAU*min | Height<br>mAU | Relative Area<br>% | Relative Height<br>% | Amount<br>n.a. |
| 1                   |           | 16.842                | 25.302          | 69.733        | 7.57               | 9.24                 | n.a.           |
| 2                   |           | 18.842                | 308.894         | 684.707       | 92.43              | 90.76                | n.a.           |
| Total:              |           |                       | 334.197         | 754.440       | 100.00             | 100.00               |                |

<sup>1</sup>H NMR (400 MHz, CDCl<sub>3</sub>) of compound **3ma**

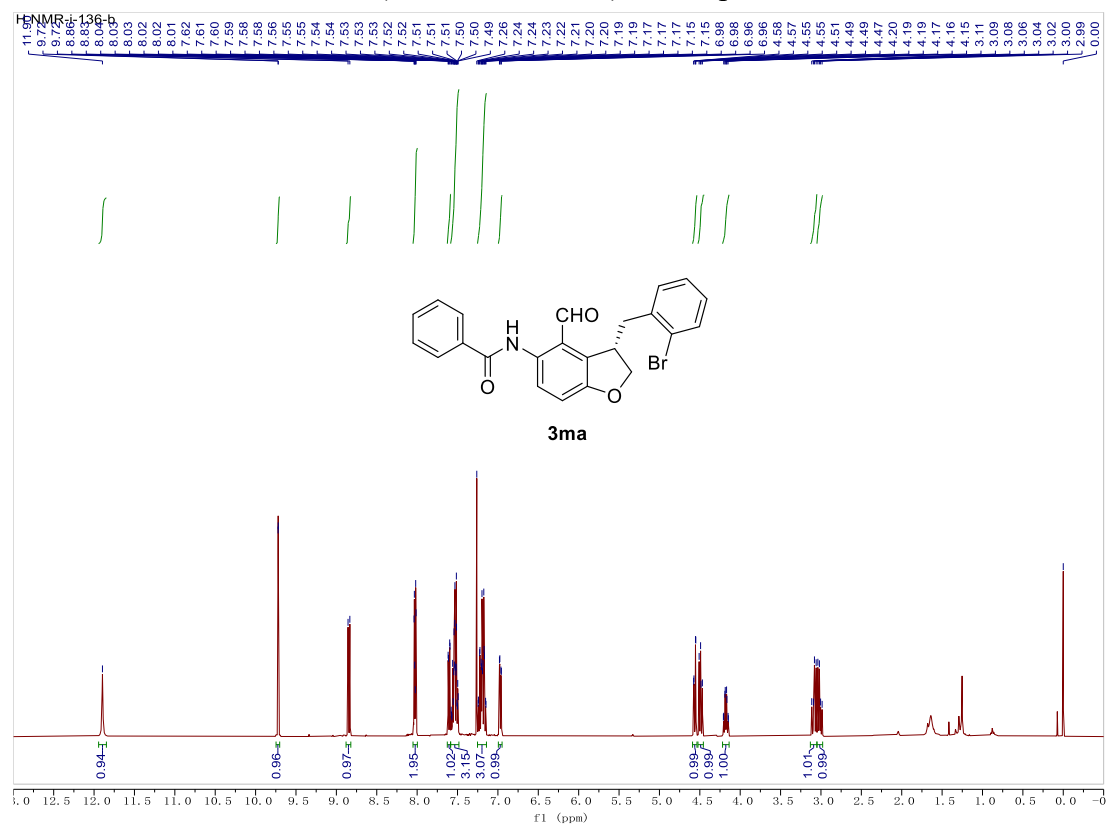

<sup>13</sup>C NMR (101 MHz, CDCl<sub>3</sub>) of compound **3ma**

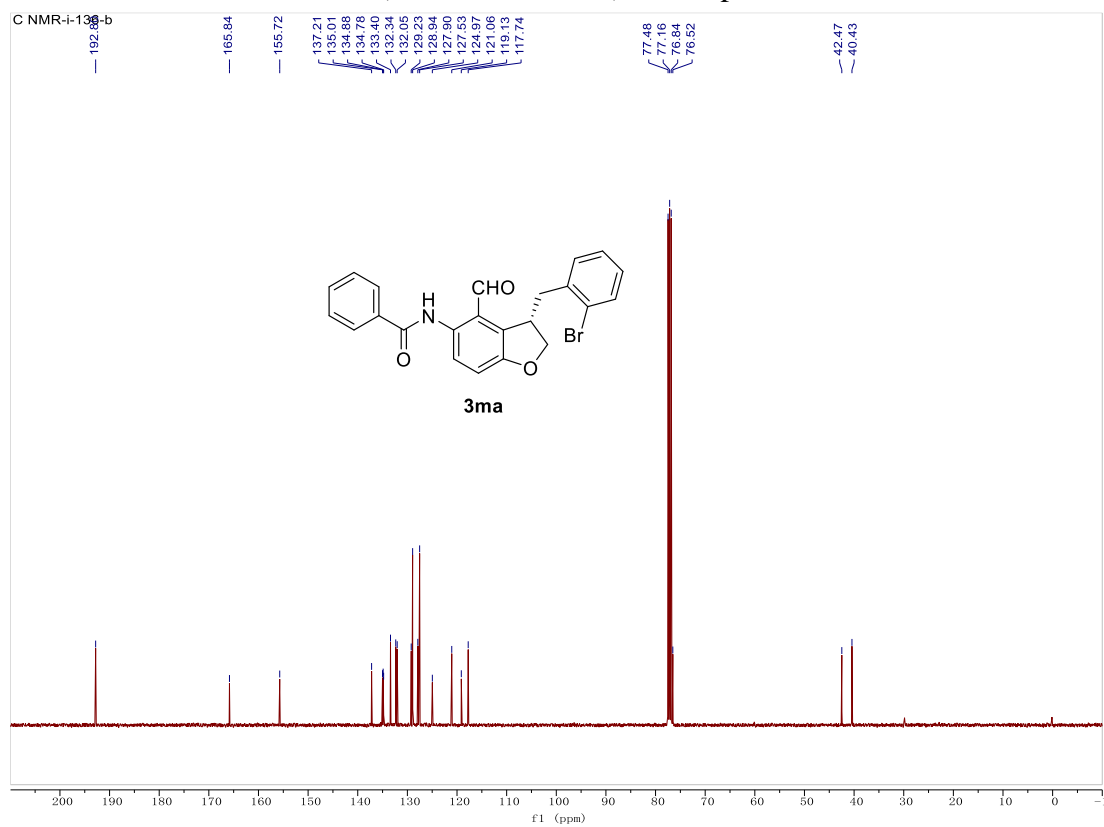

# HPLC spectra and data of compound **3ma**

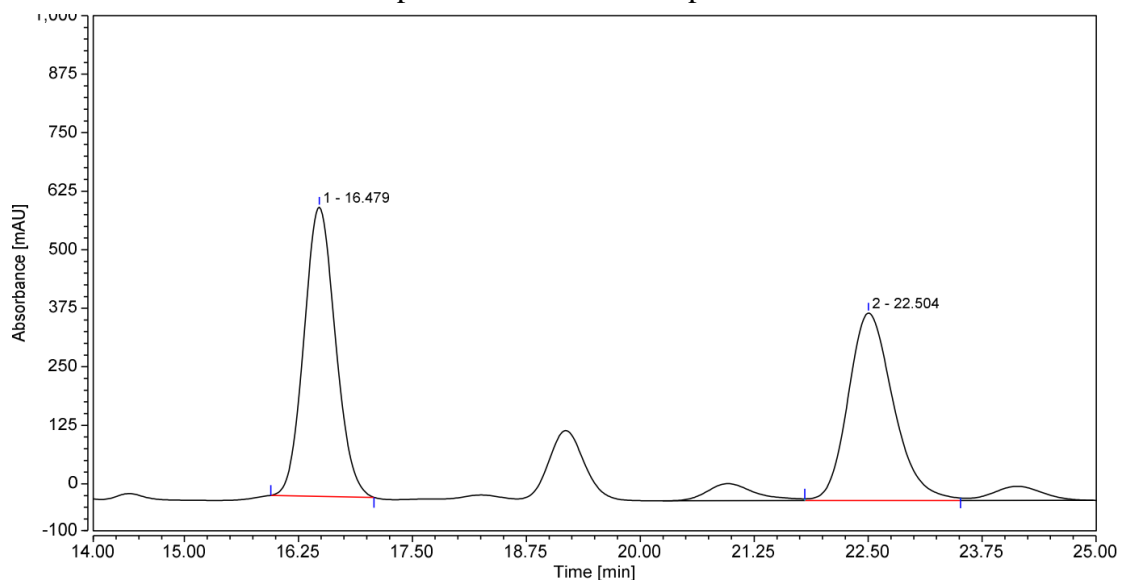

| Integration Results |           |                       |                 |               |                    |                      |                |
|---------------------|-----------|-----------------------|-----------------|---------------|--------------------|----------------------|----------------|
| No.                 | Peak Name | Retention Time<br>min | Area<br>mAU*min | Height<br>mAU | Relative Area<br>% | Relative Height<br>% | Amount<br>n.a. |
| 1                   |           | 16.479                | 247.072         | 617.258       | 51.81              | 60.65                | n.a.           |
| 2                   |           | 22.504                | 229.805         | 400.424       | 48.19              | 39.35                | n.a.           |
| Total:              |           |                       | 476.878         | 1017.681      | 100.00             | 100.00               |                |

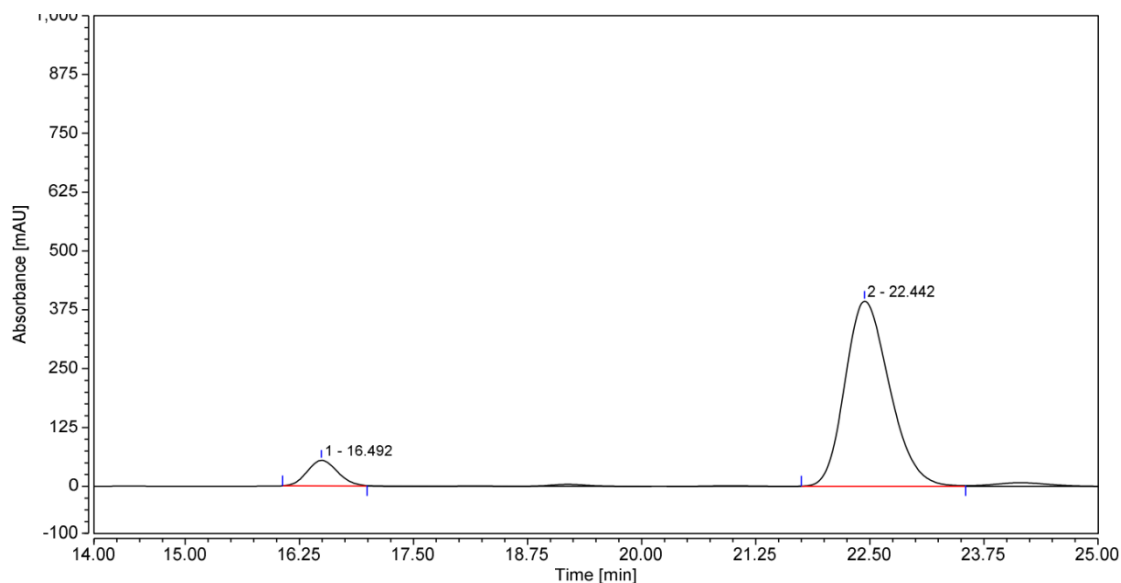

| Integration Results |           |                       |                 |               |                    |                      |                |
|---------------------|-----------|-----------------------|-----------------|---------------|--------------------|----------------------|----------------|
| No.                 | Peak Name | Retention Time<br>min | Area<br>mAU*min | Height<br>mAU | Relative Area<br>% | Relative Height<br>% | Amount<br>n.a. |
| 1                   |           | 16.492                | 20.998          | 54.470        | 8.61               | 12.16                | n.a.           |
| 2                   |           | 22.442                | 222.866         | 393.292       | 91.39              | 87.84                | n.a.           |
| Total:              |           |                       | 243.864         | 447.762       | 100.00             | 100.00               |                |

<sup>1</sup>H NMR (400 MHz, CDCl<sub>3</sub>) of compound **3na**

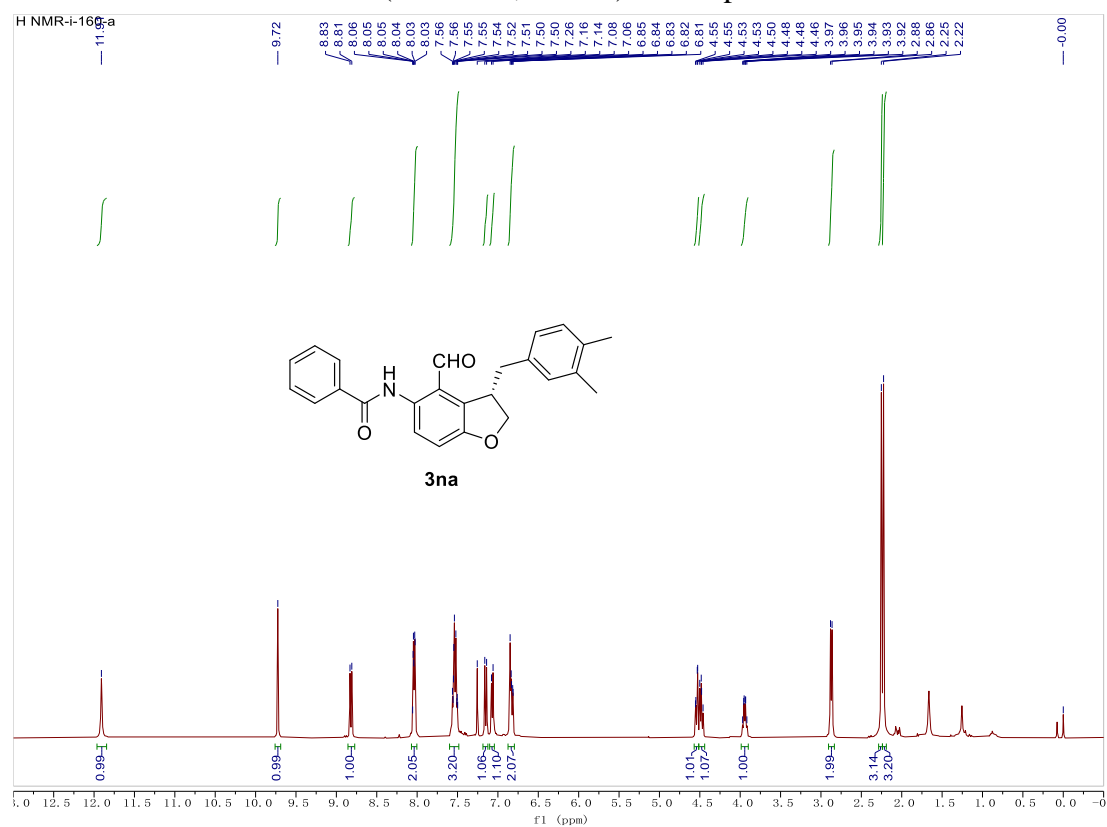

<sup>13</sup>C NMR (101 MHz, CDCl<sub>3</sub>) of compound **3na**

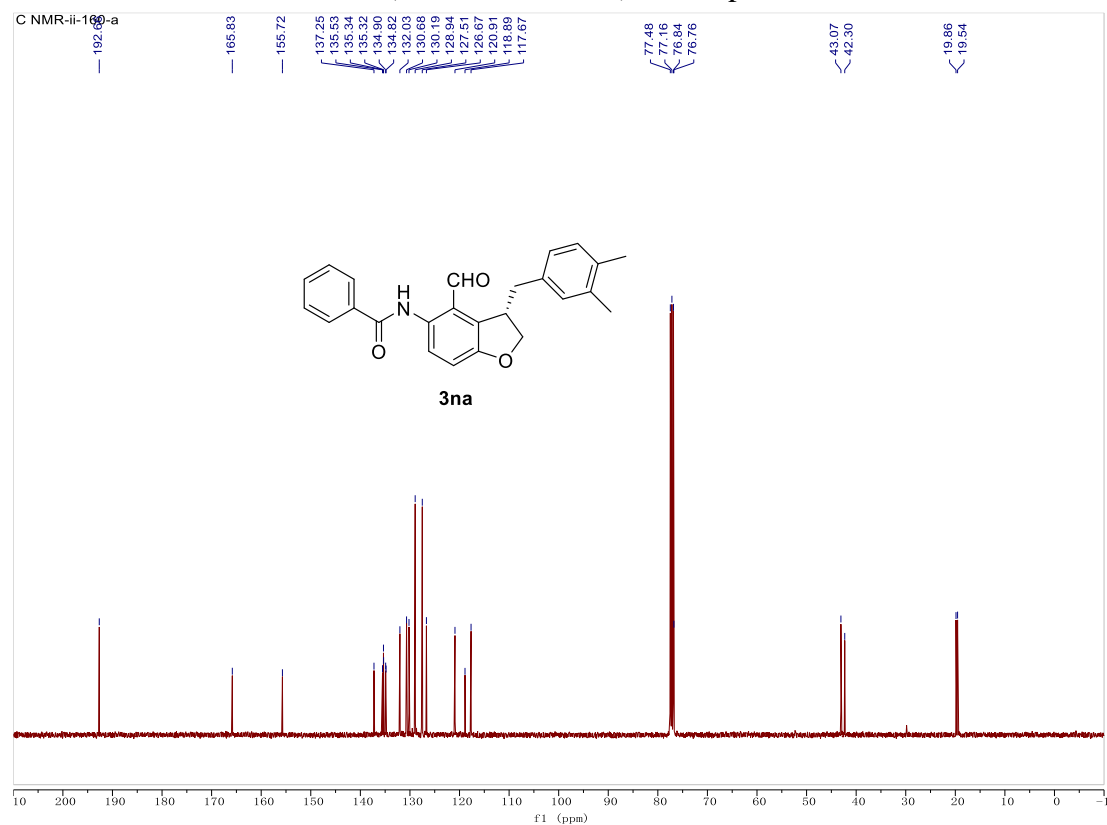

# HPLC spectra and data of compound 3na

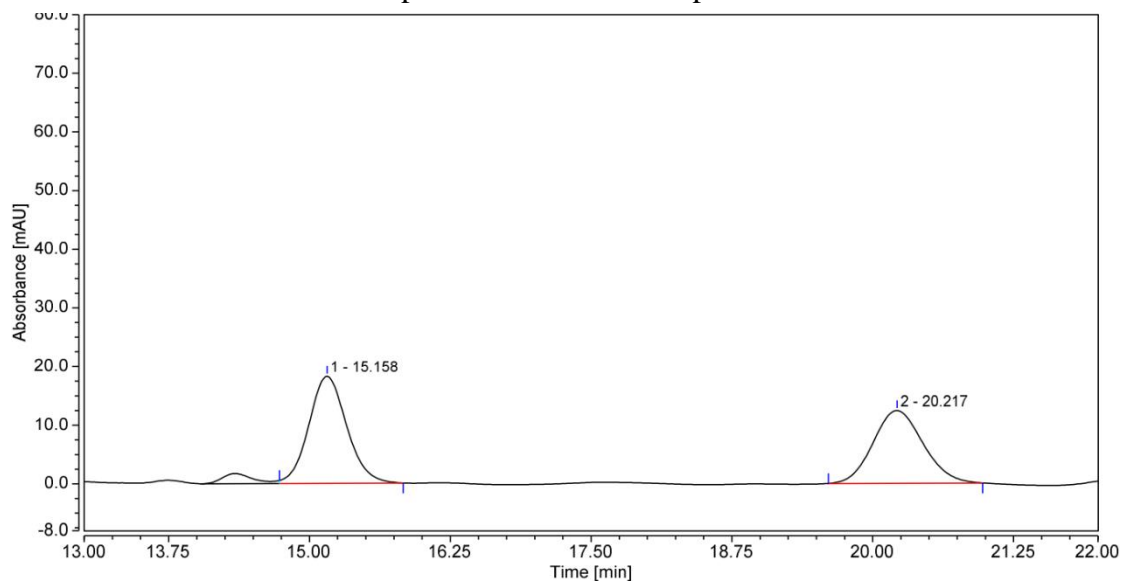

| Integration Results |           |                       |                 |               |                    |                      |                |
|---------------------|-----------|-----------------------|-----------------|---------------|--------------------|----------------------|----------------|
| No.                 | Peak Name | Retention Time<br>min | Area<br>mAU*min | Height<br>mAU | Relative Area<br>% | Relative Height<br>% | Amount<br>n.a. |
| 1                   |           | 15.158                | 7.114           | 18.246        | 52.70              | 59.52                | n.a.           |
| 2                   |           | 20.217                | 6.386           | 12.409        | 47.30              | 40.48                | n.a.           |
| Total:              |           |                       | 13.500          | 30.655        | 100.00             | 100.00               |                |

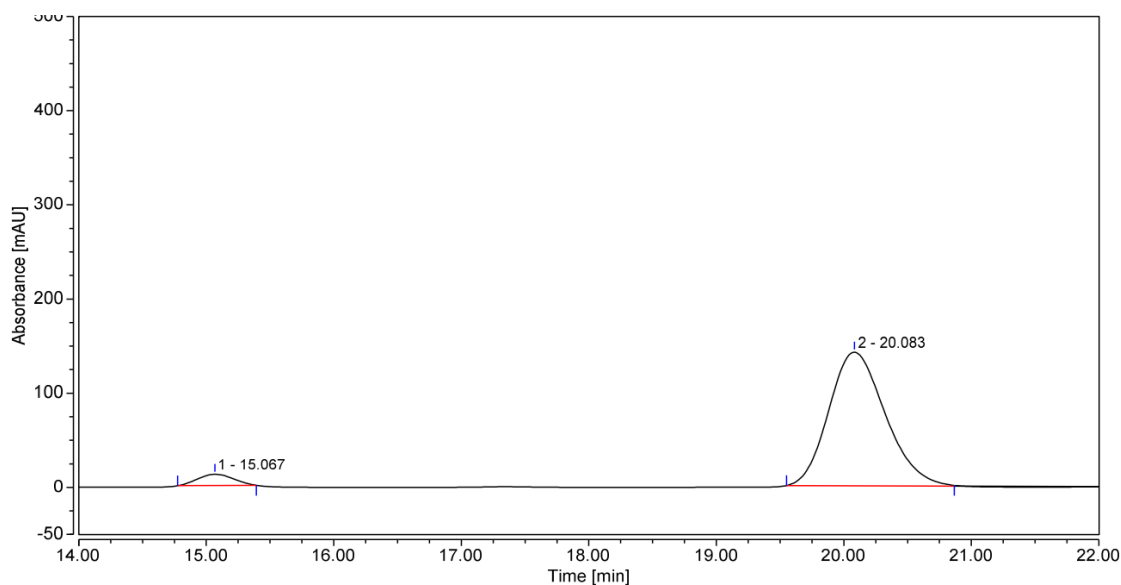

| Integration Results |           |                       |                 |               |                    |                      |                |
|---------------------|-----------|-----------------------|-----------------|---------------|--------------------|----------------------|----------------|
| No.                 | Peak Name | Retention Time<br>min | Area<br>mAU*min | Height<br>mAU | Relative Area<br>% | Relative Height<br>% | Amount<br>n.a. |
| 1                   |           | 15.067                | 3.865           | 11.947        | 5.05               | 7.77                 | n.a.           |
| 2                   |           | 20.083                | 72.670          | 141.898       | 94.95              | 92.23                | n.a.           |
| Total:              |           |                       | 76.534          | 153.845       | 100.00             | 100.00               |                |

<sup>1</sup>H NMR (400 MHz, CDCl<sub>3</sub>) of compound **3oa**

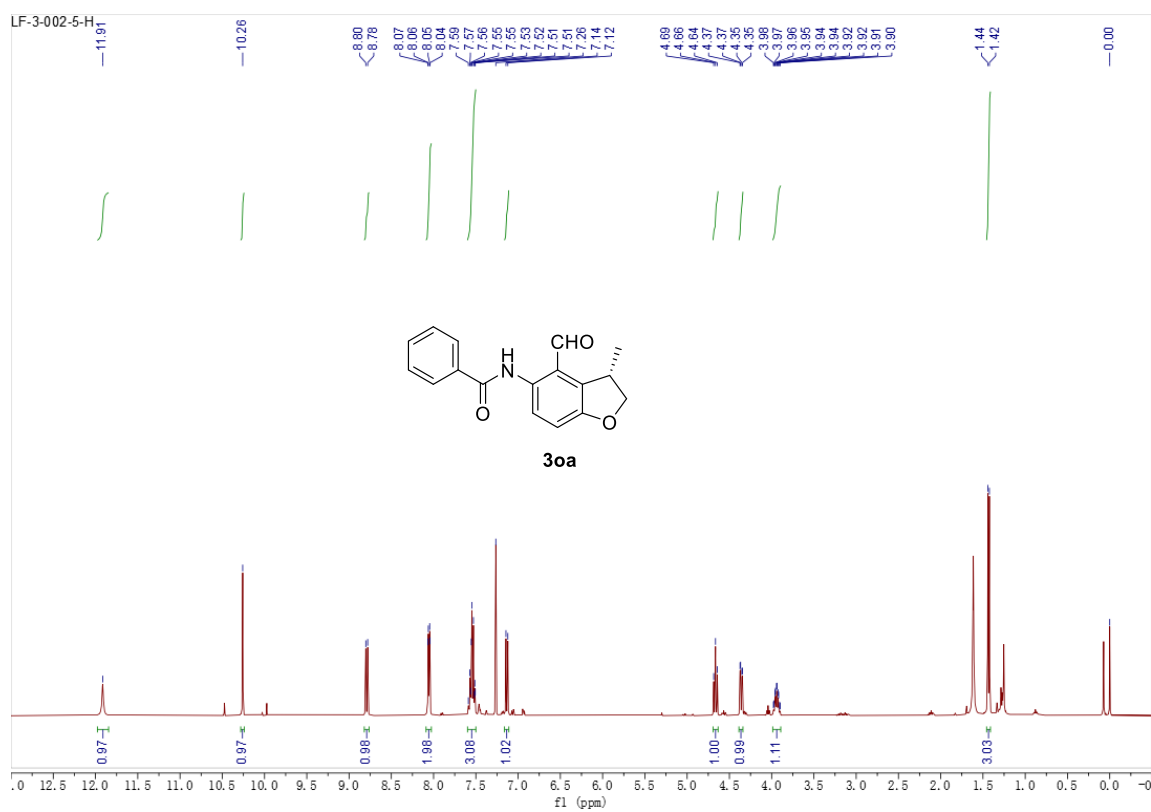

<sup>13</sup>C NMR (101 MHz, CDCl<sub>3</sub>) of compound **3oa**

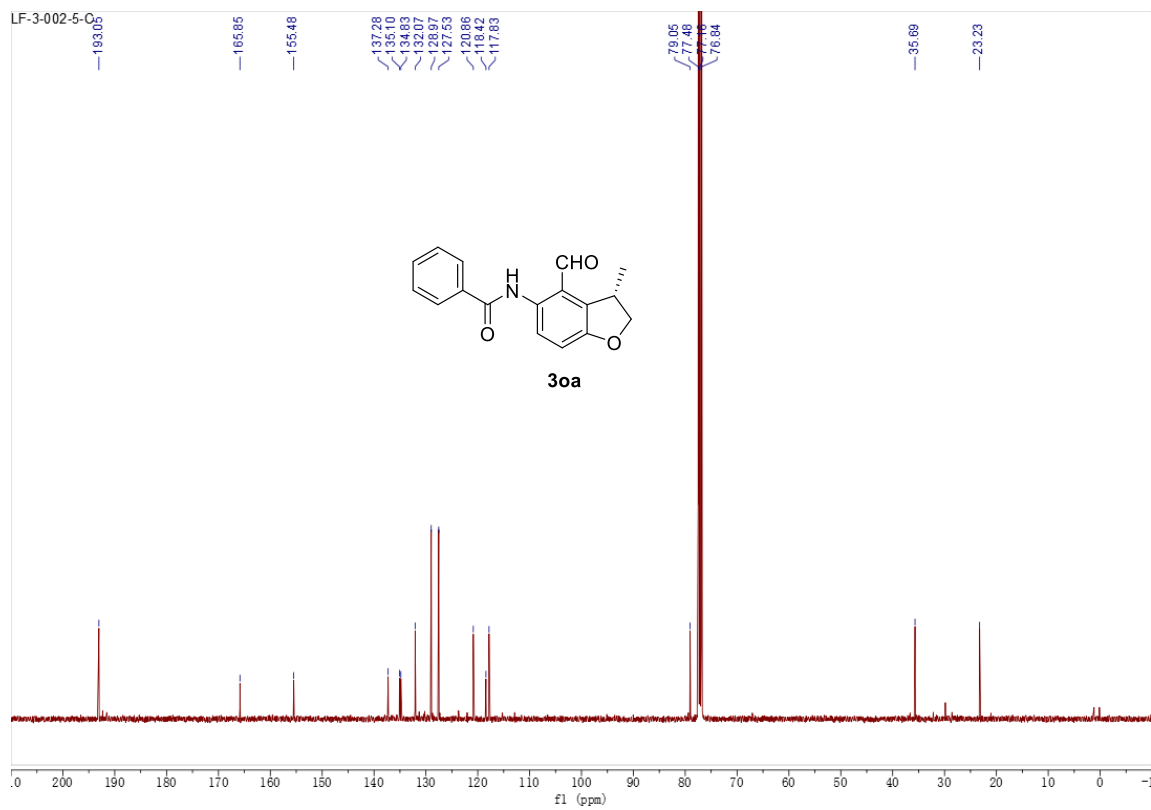

# HPLC spectra and data of compound **3oa**

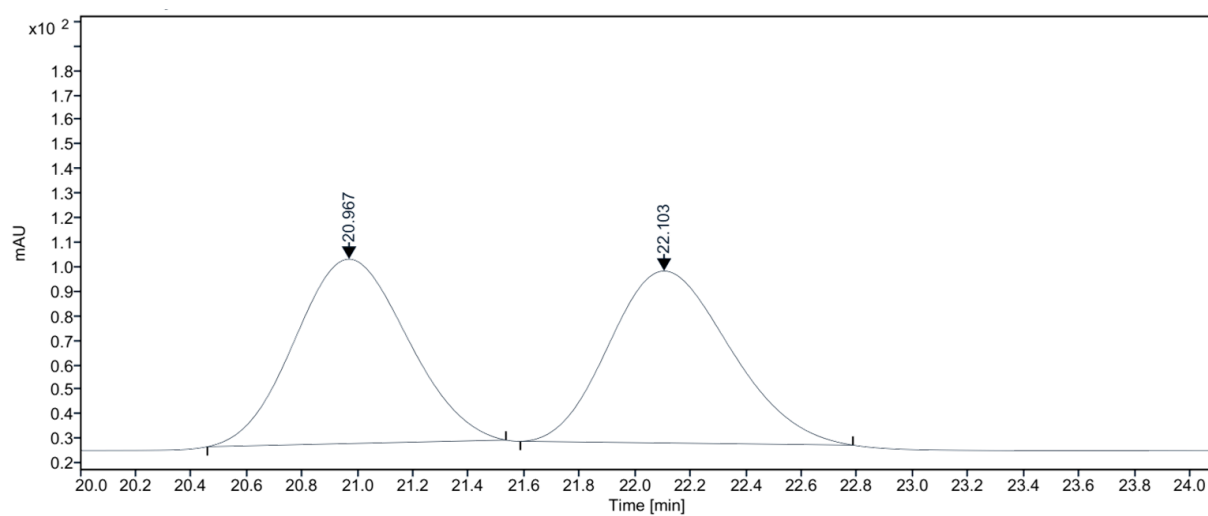

| RT [min] | Height | Height% | Area       | Area% |
|----------|--------|---------|------------|-------|
| 20.967   | 75.194 | 51.74   | 2124.55021 | 50.01 |
| 22.103   | 70.123 | 48.26   | 2123.67054 | 49.99 |

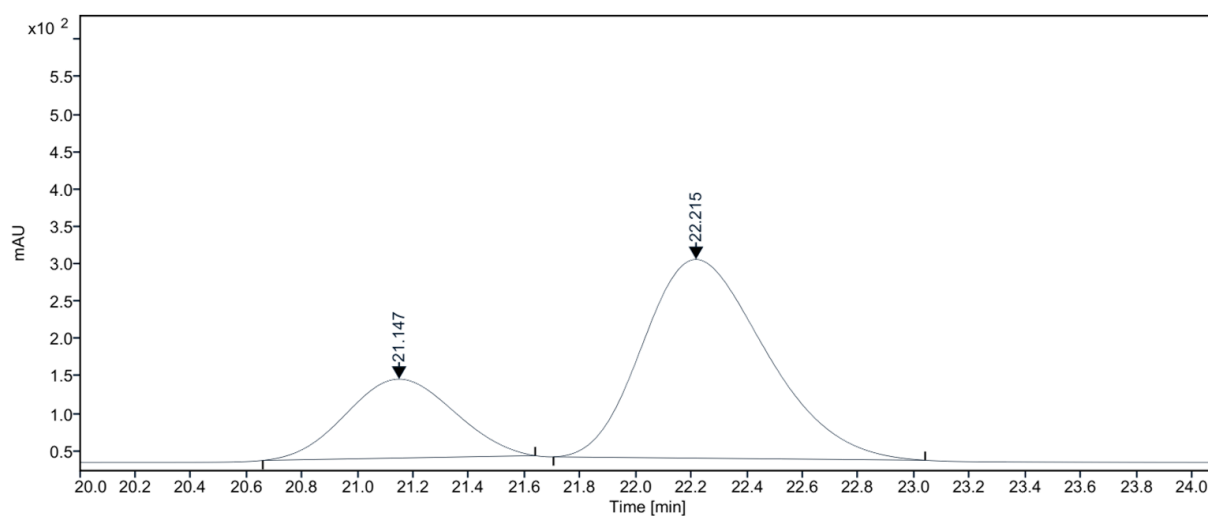

| RT [min] | Height  | Height% | Area       | Area% |
|----------|---------|---------|------------|-------|
| 21.147   | 99.553  | 28.29   | 2662.33526 | 25.63 |
| 22.215   | 252.332 | 71.71   | 7723.34120 | 74.37 |

<sup>1</sup>H NMR (400 MHz, CDCl<sub>3</sub>) of compound **3pa**

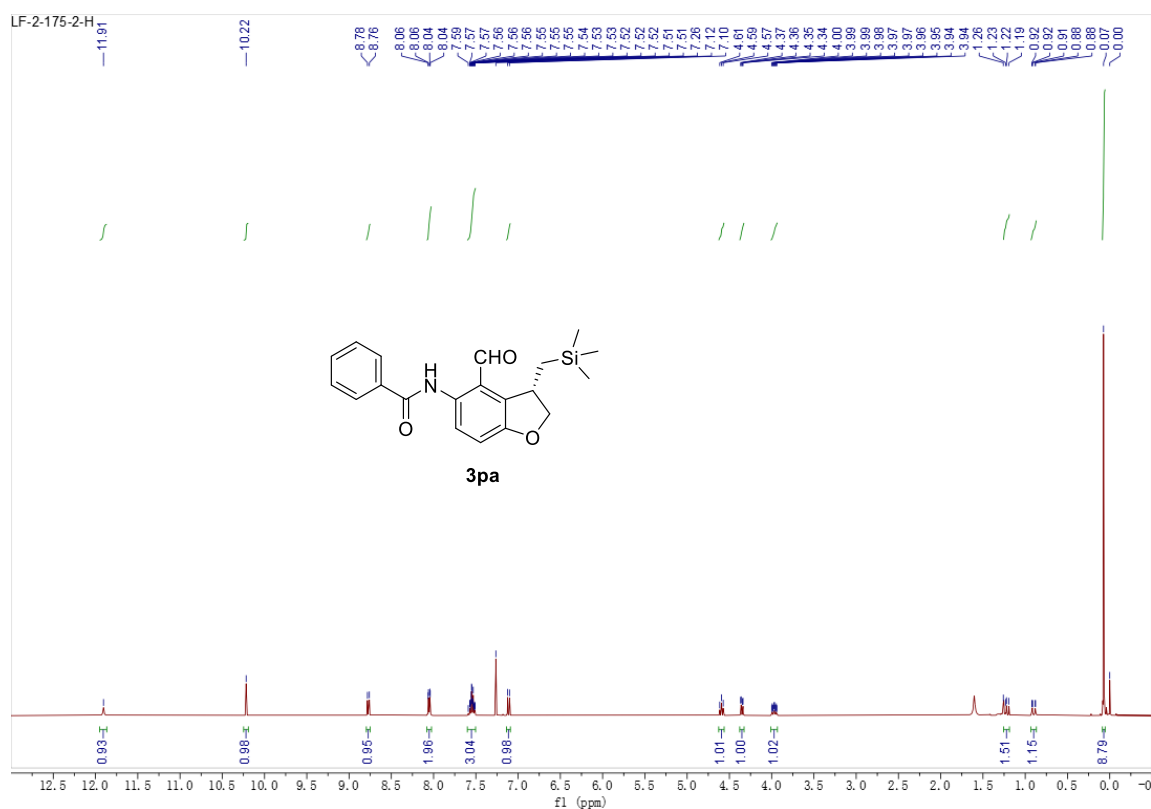

<sup>13</sup>C NMR (101 MHz, CDCl<sub>3</sub>) of compound **3pa**

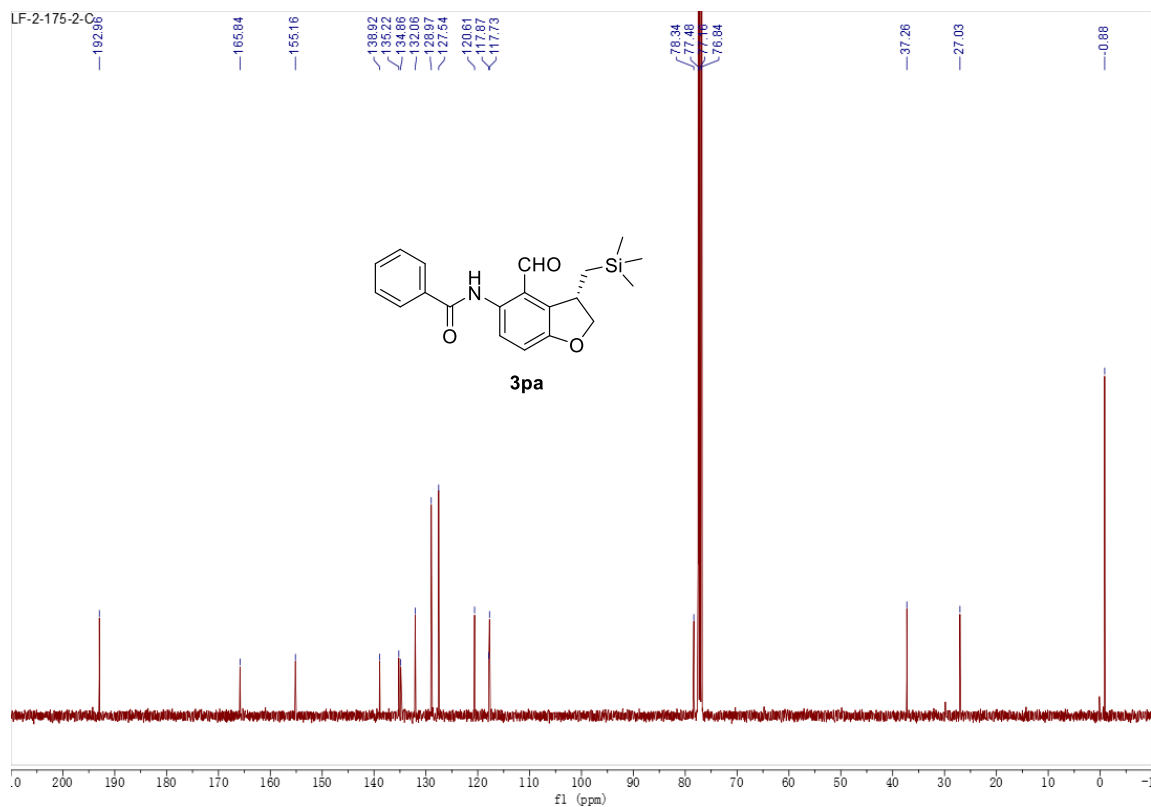

# HPLC spectra and data of compound **3pa**

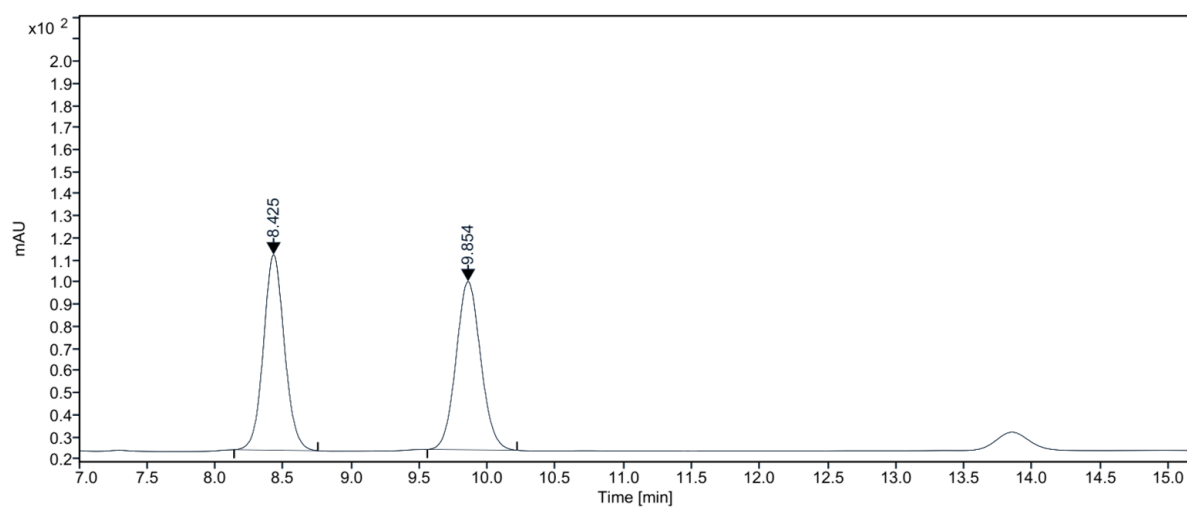

| RT [min] | Height | Height% | Area      | Area% |
|----------|--------|---------|-----------|-------|
| 8.425    | 88.466 | 53.73   | 949.70314 | 49.71 |
| 9.854    | 76.197 | 46.27   | 960.96245 | 50.29 |

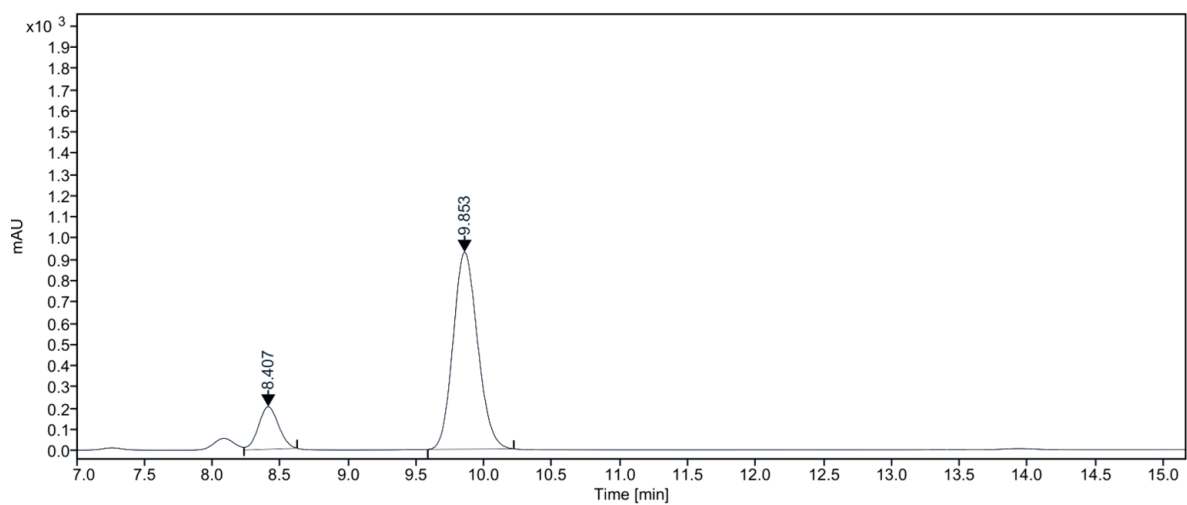

| RT [min] | Height  | Height% | Area        | Area% |
|----------|---------|---------|-------------|-------|
| 8.407    | 200.224 | 17.75   | 2063.29536  | 15.03 |
| 9.853    | 927.748 | 82.25   | 11664.83442 | 84.97 |

<sup>1</sup>H NMR (400 MHz, CDCl<sub>3</sub>) of compound **3qa**

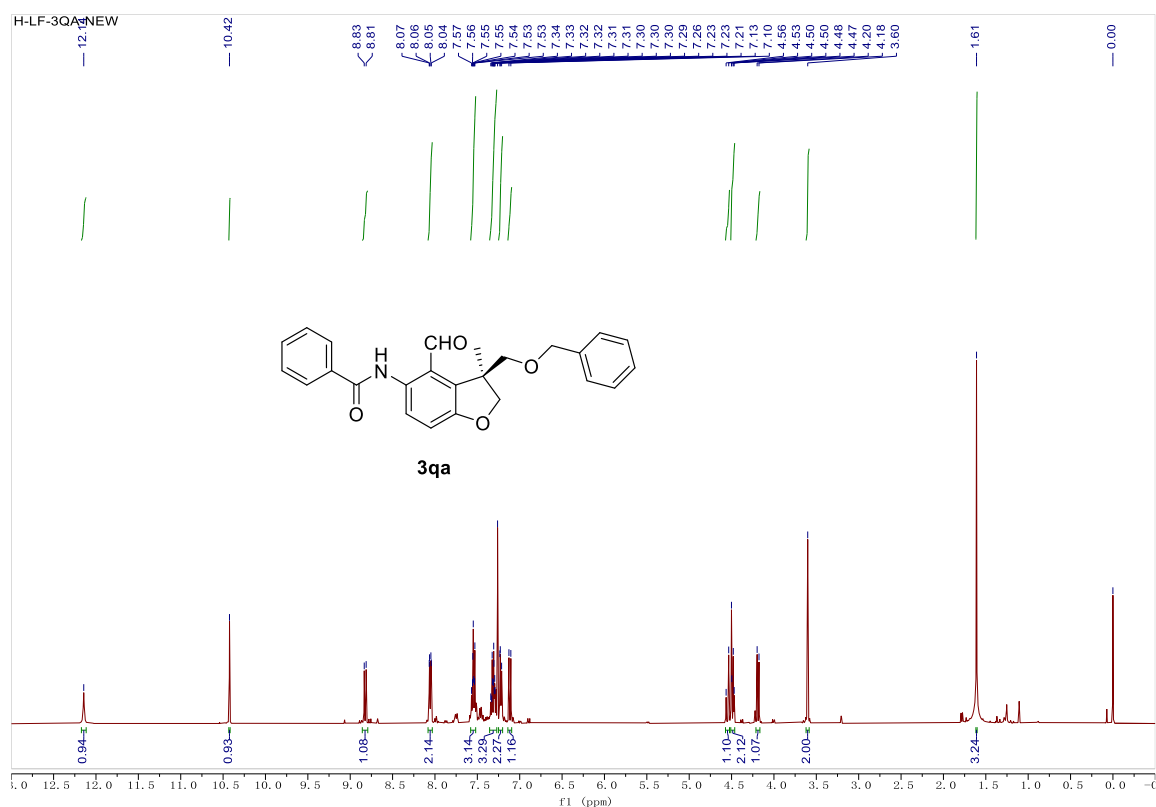

<sup>13</sup>C NMR (101 MHz, CDCl<sub>3</sub>) of compound **3qa**

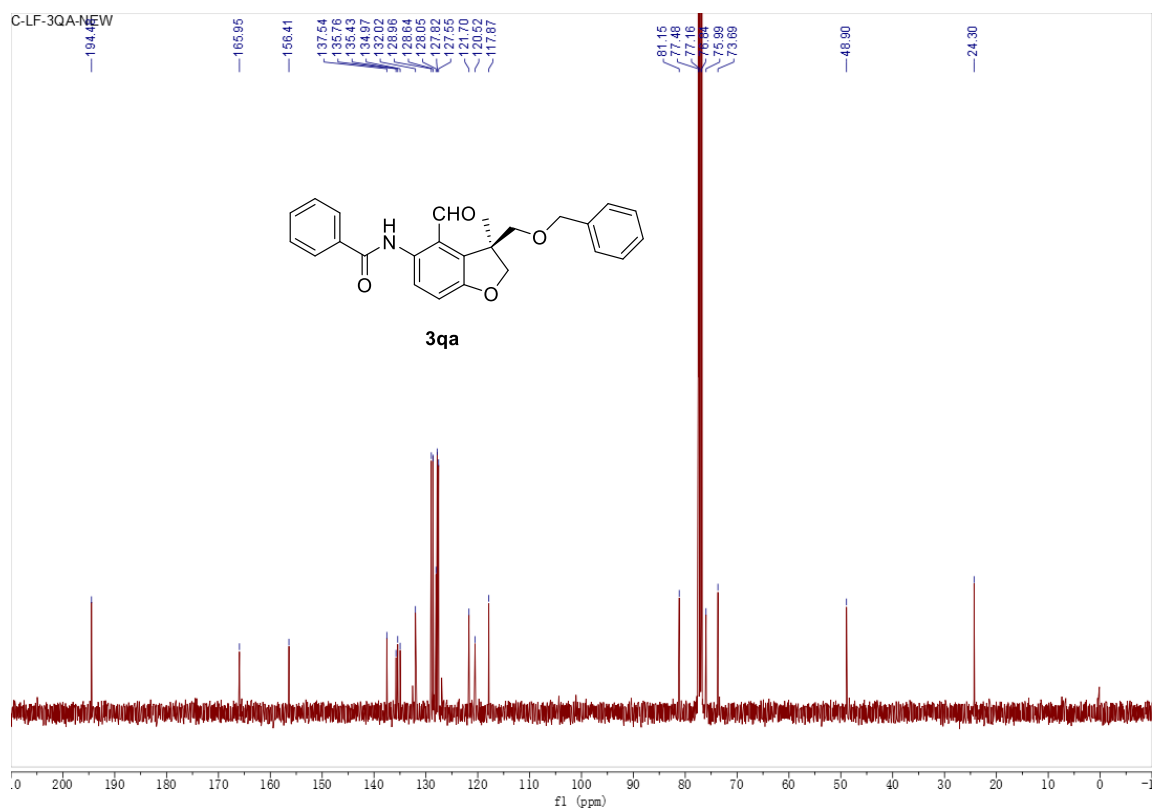

# HPLC spectra and data of compound **3qa**

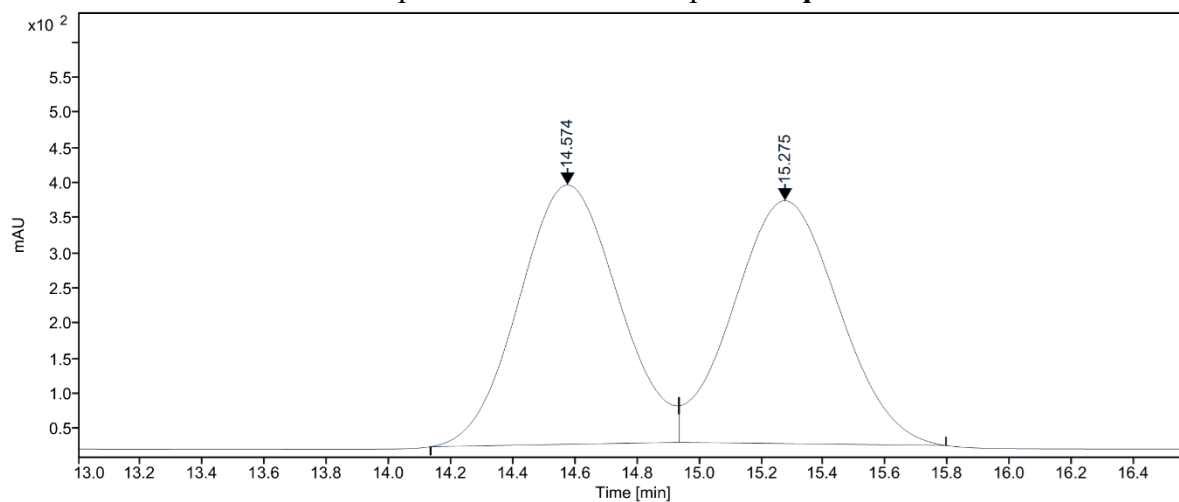

| RT [min] | Height  | Height% | Area       | Area% |
|----------|---------|---------|------------|-------|
| 14.574   | 368.844 | 51.64   | 8214.09034 | 50.09 |
| 15.275   | 345.387 | 48.36   | 8185.59269 | 49.91 |

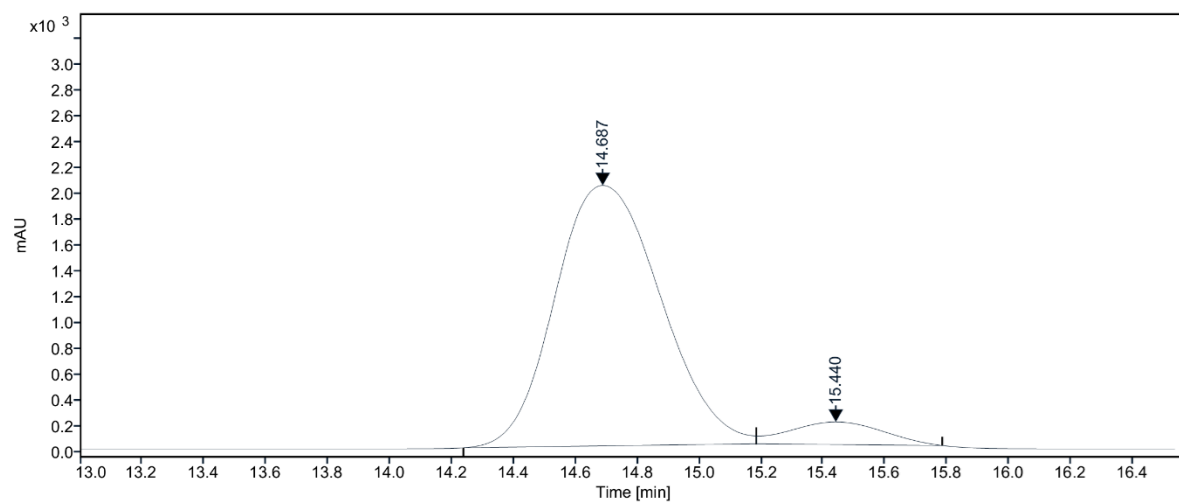

| RT [min] | Height   | Height% | Area        | Area% |
|----------|----------|---------|-------------|-------|
| 14.687   | 2023.190 | 92.03   | 48075.82572 | 92.85 |
| 15.440   | 175.164  | 7.97    | 3700.88422  | 7.15  |

<sup>1</sup>H NMR (400 MHz, CDCl<sub>3</sub>) of compound **3ra**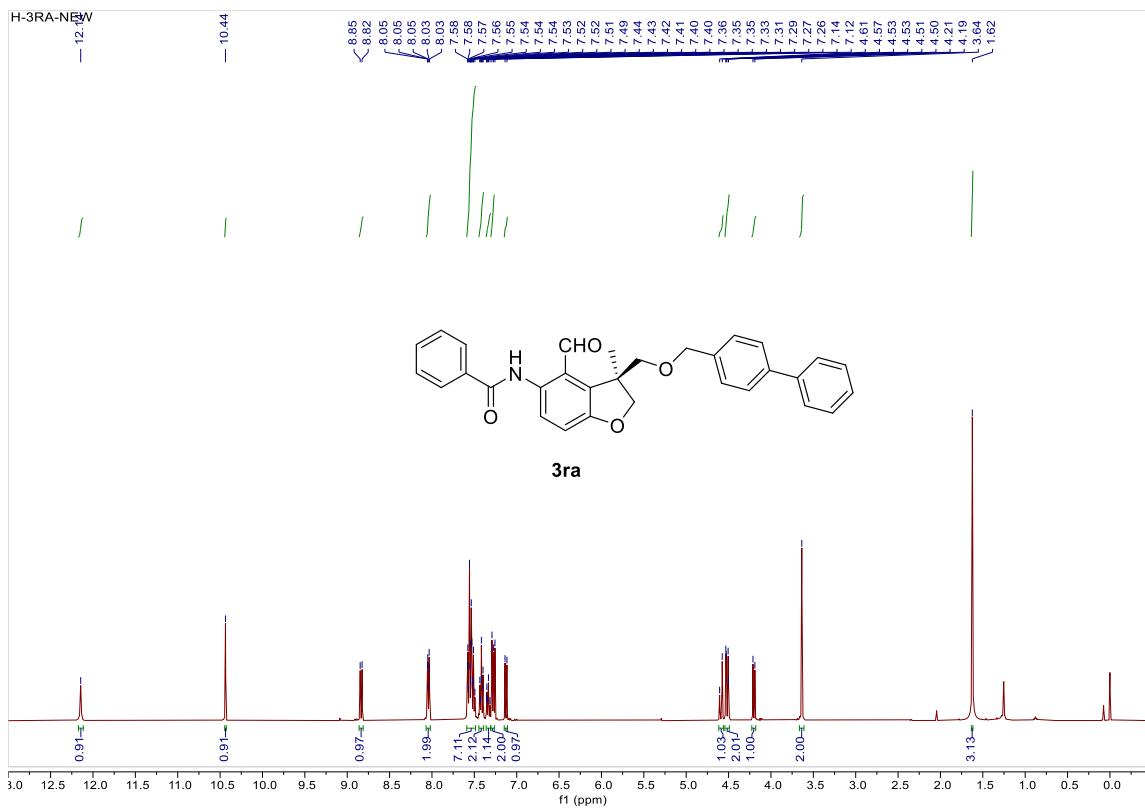 $^{13}\text{C}$  NMR (101 MHz,  $\text{CDCl}_3$ ) of compound **3ra**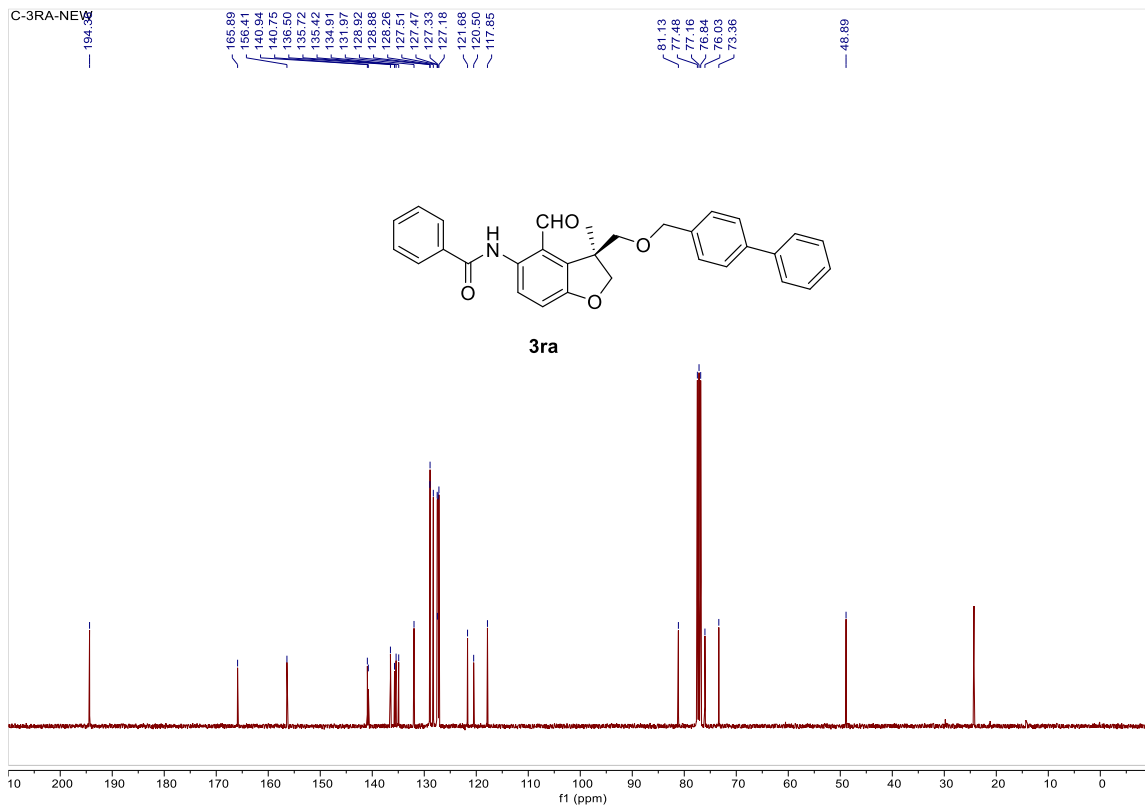

# HPLC spectra and data of compound 3ra

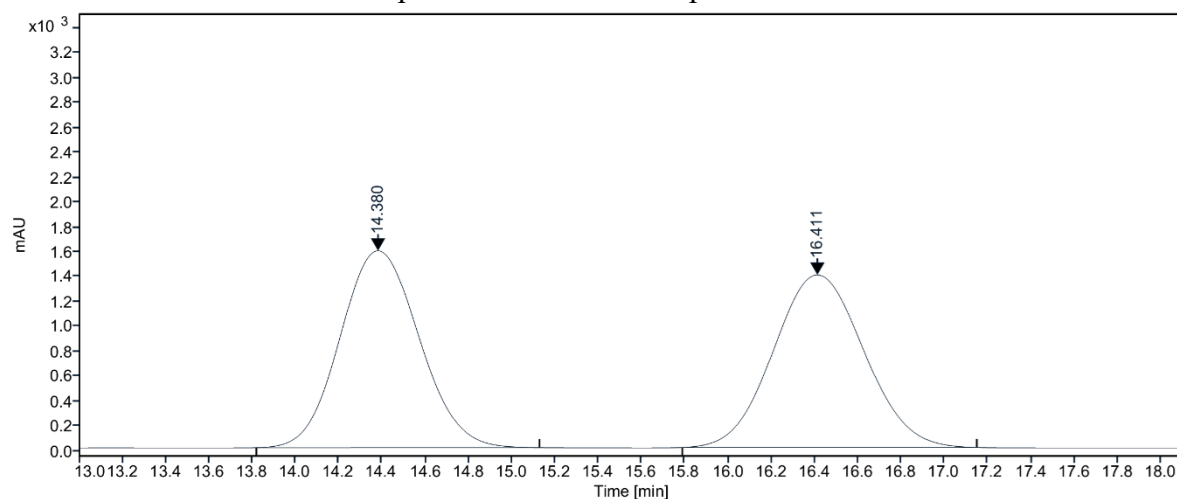

| RT [min] | Height   | Height% | Area        | Area% |
|----------|----------|---------|-------------|-------|
| 14.380   | 1584.672 | 53.29   | 40282.68269 | 49.86 |
| 16.411   | 1388.728 | 46.71   | 40515.44733 | 50.14 |

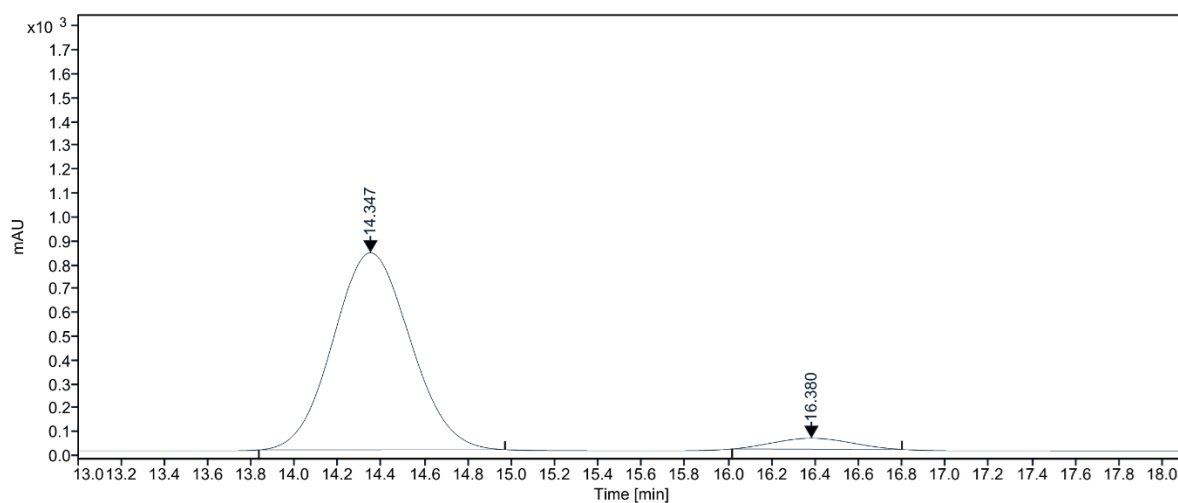

| RT [min] | Height  | Height% | Area        | Area% |
|----------|---------|---------|-------------|-------|
| 14.347   | 825.554 | 94.76   | 20424.59700 | 94.75 |
| 16.380   | 45.684  | 5.24    | 1130.61033  | 5.25  |

<sup>1</sup>H NMR (400 MHz, CDCl<sub>3</sub>) of compound **3sa**

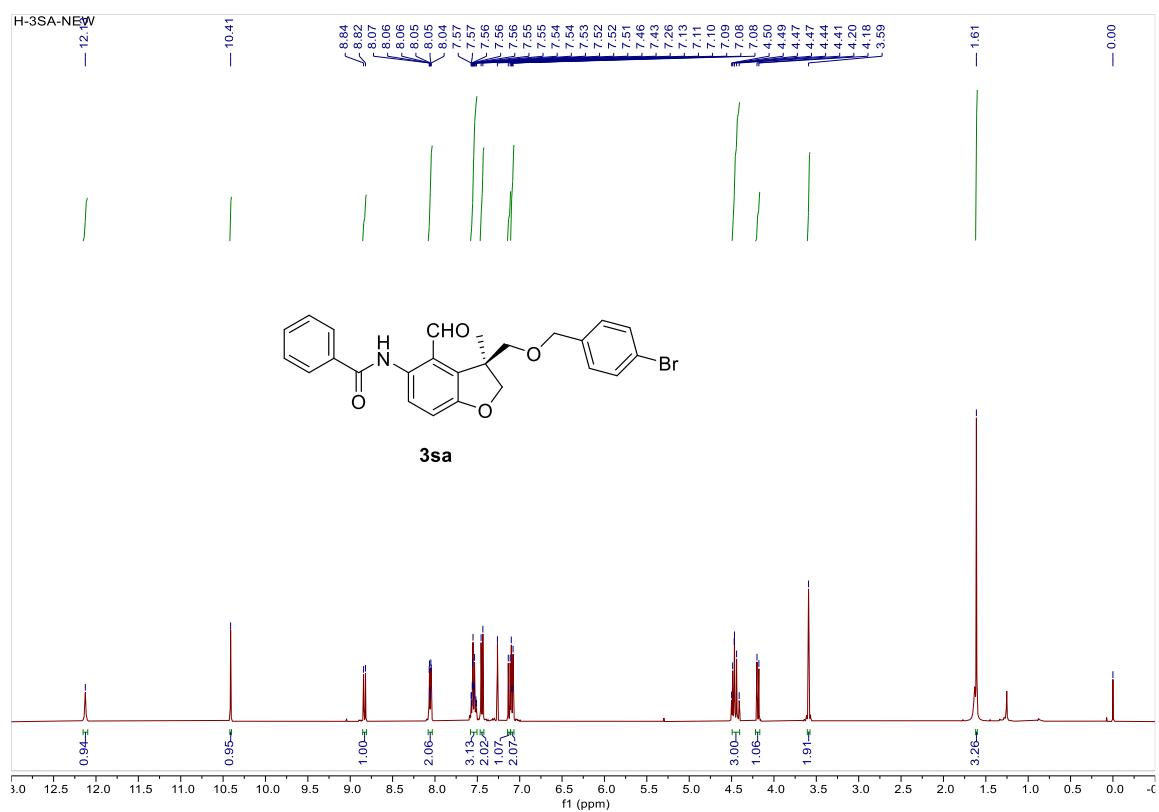

<sup>13</sup>C NMR (101 MHz, CDCl<sub>3</sub>) of compound **3sa**

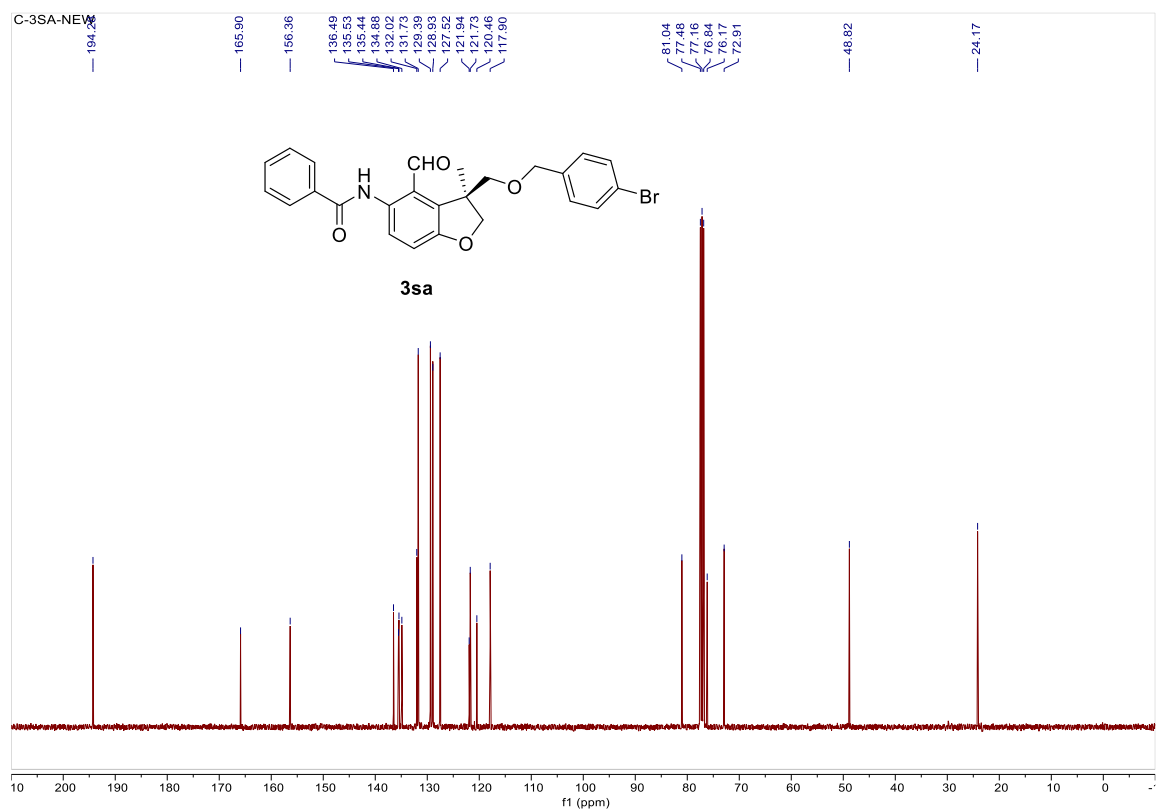

# HPLC spectra and data of compound 3sa

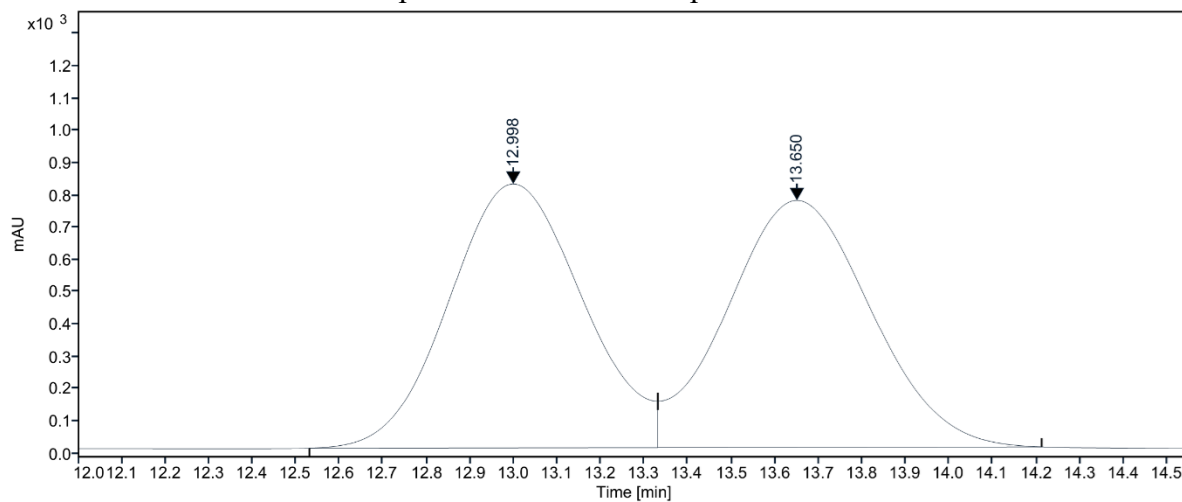

| RT [min] | Height  | Height% | Area        | Area% |
|----------|---------|---------|-------------|-------|
| 12.998   | 818.475 | 51.65   | 17484.81784 | 49.81 |
| 13.650   | 766.044 | 48.35   | 17617.69826 | 50.19 |

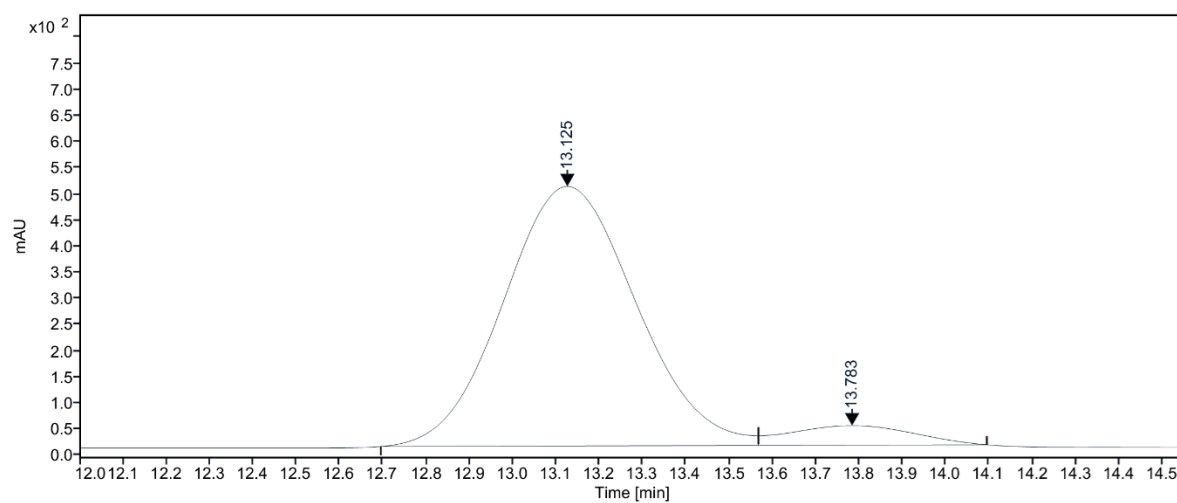

| RT [min] | Height  | Height% | Area        | Area% |
|----------|---------|---------|-------------|-------|
| 13.125   | 496.670 | 92.99   | 10560.05529 | 93.46 |
| 13.783   | 37.455  | 7.01    | 738.54995   | 6.54  |

<sup>1</sup>H NMR (400 MHz, CDCl<sub>3</sub>) of compound **3ta**

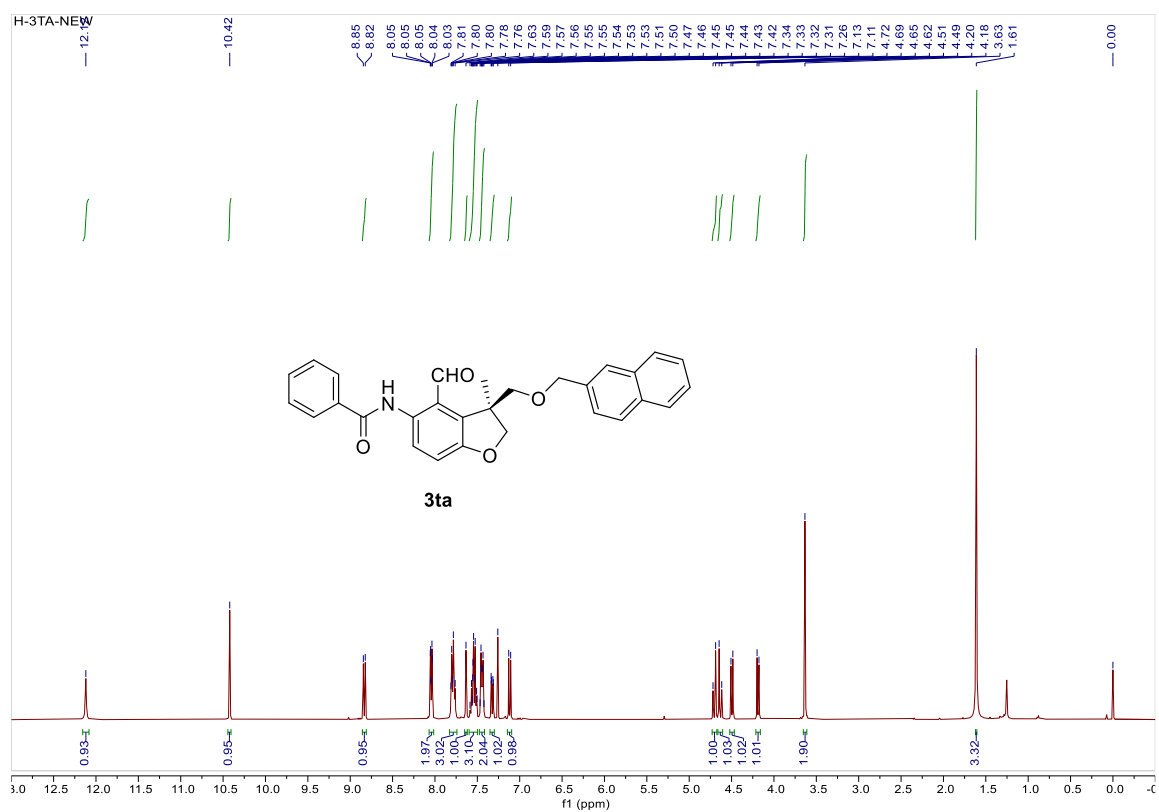

<sup>13</sup>C NMR (101 MHz, CDCl<sub>3</sub>) of compound **3ta**

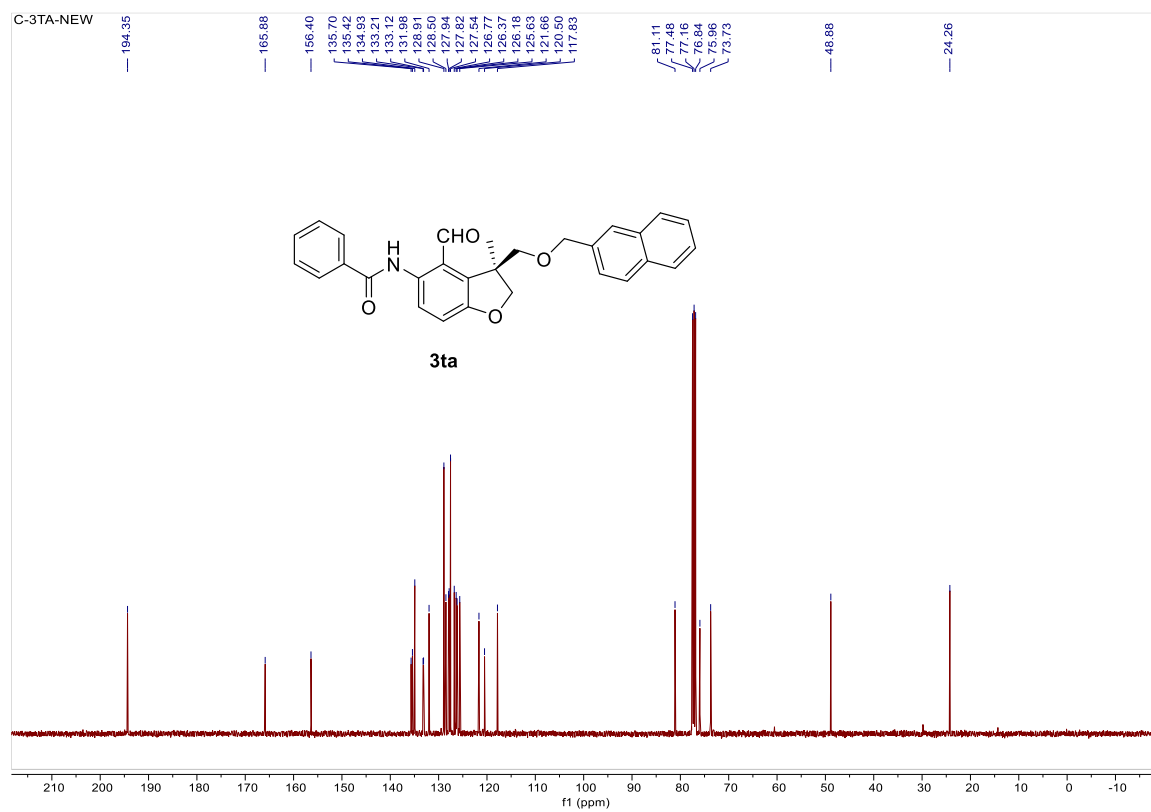

# HPLC spectra and data of compound **3ta**

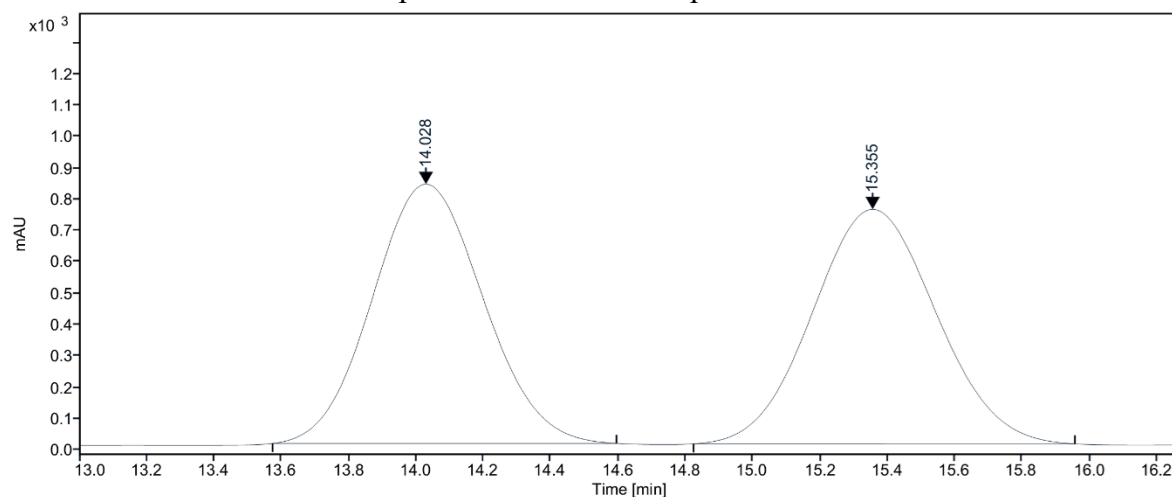

| RT [min] | Height  | Height% | Area        | Area% |
|----------|---------|---------|-------------|-------|
| 14.028   | 827.989 | 52.50   | 18987.04679 | 49.79 |
| 15.355   | 749.137 | 47.50   | 19148.00343 | 50.21 |

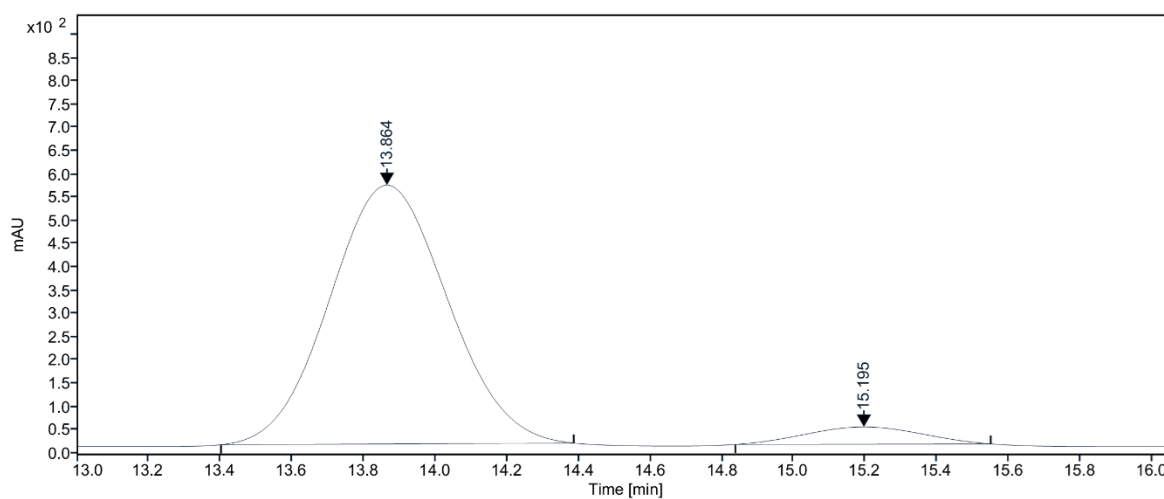

| RT [min] | Height  | Height% | Area        | Area% |
|----------|---------|---------|-------------|-------|
| 13.864   | 556.469 | 93.75   | 12737.52164 | 93.89 |
| 15.195   | 37.073  | 6.25    | 828.28386   | 6.11  |

<sup>1</sup>H NMR (400 MHz, CDCl<sub>3</sub>) of compound **3ua**

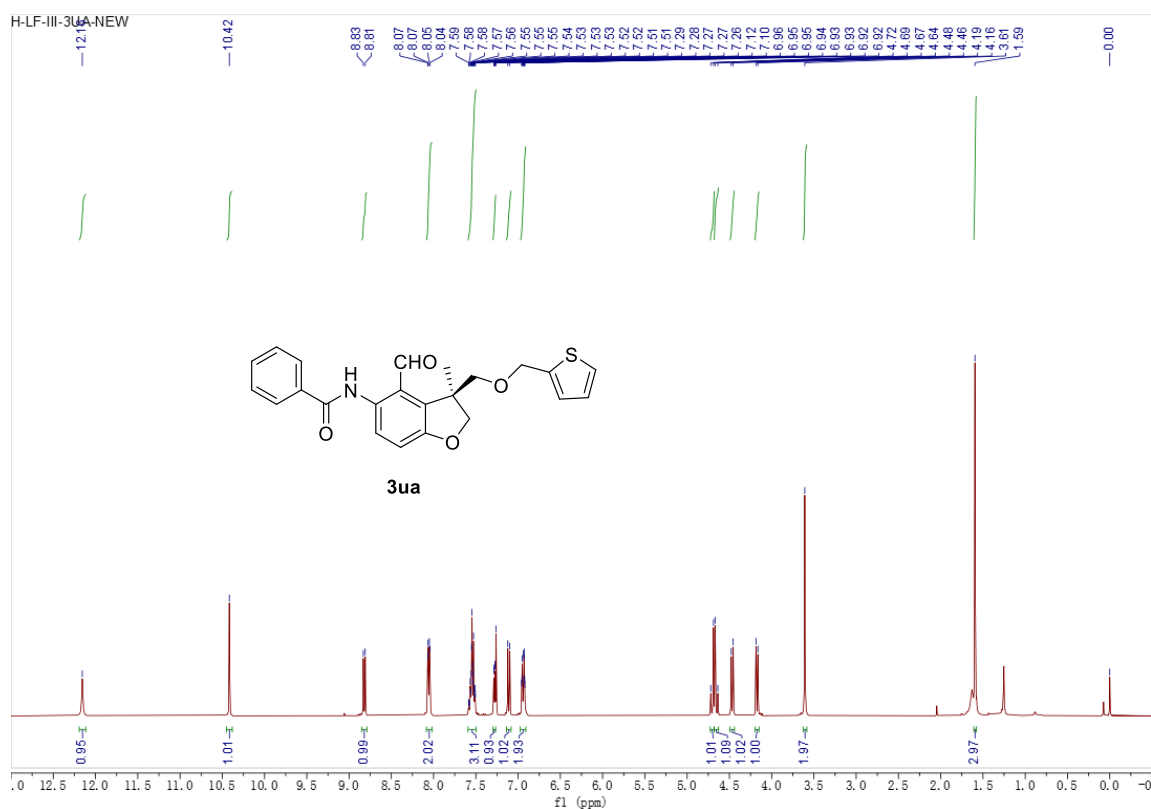

<sup>13</sup>C NMR (101 MHz, CDCl<sub>3</sub>) of compound **3ua**

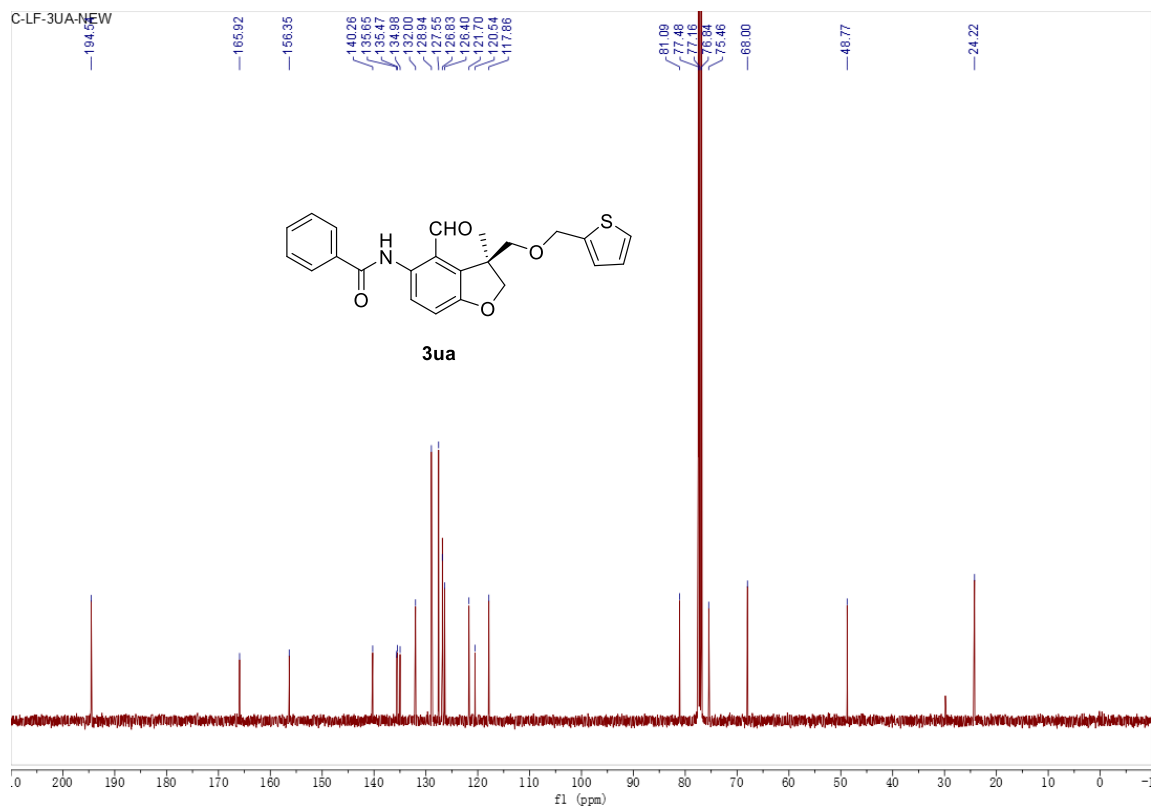

# HPLC spectra and data of compound 3ua

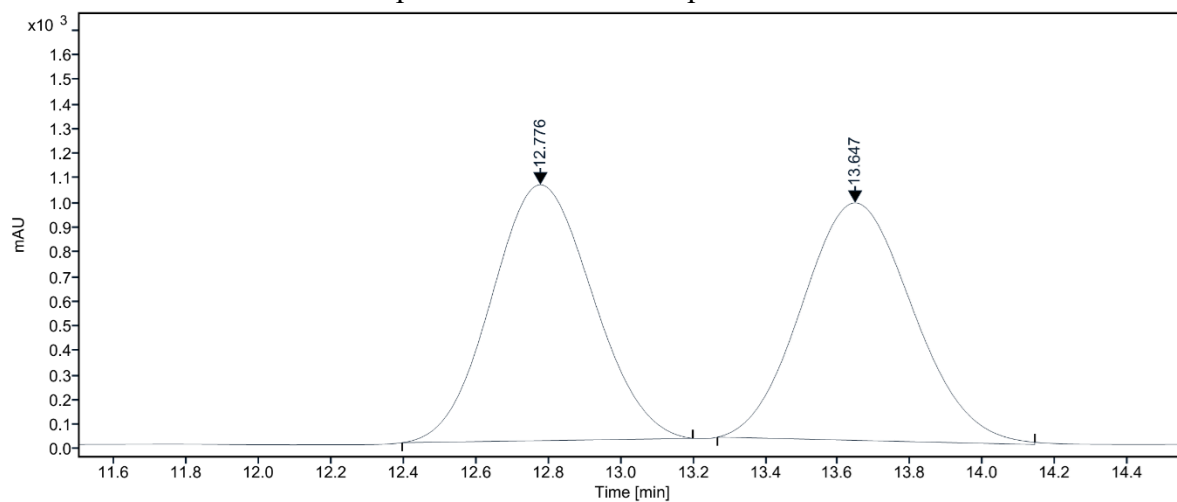

| RT [min] | Height   | Height% | Area        | Area% |
|----------|----------|---------|-------------|-------|
| 12.776   | 1038.551 | 51.87   | 20201.76839 | 49.53 |
| 13.647   | 963.668  | 48.13   | 20581.33836 | 50.47 |

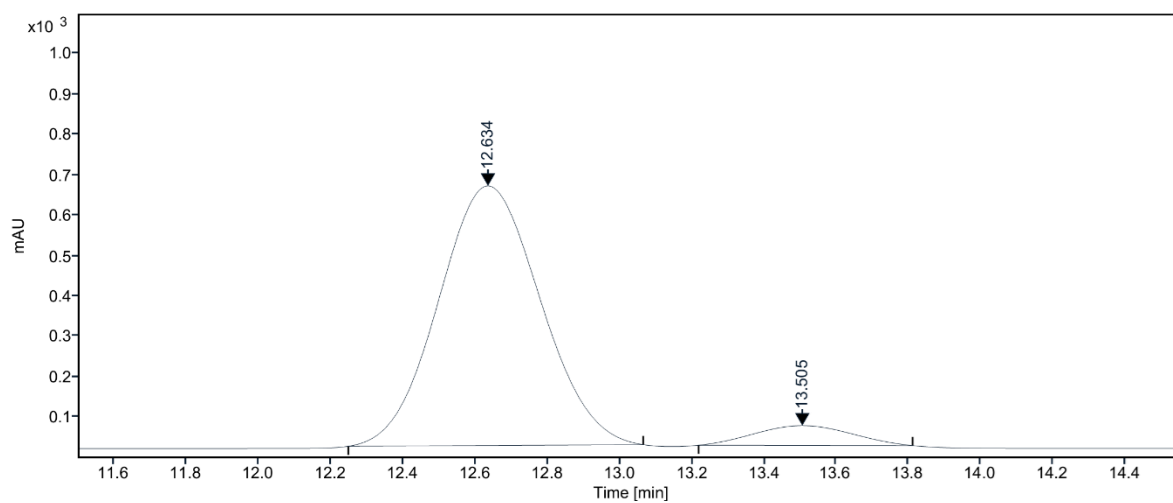

| RT [min] | Height  | Height% | Area        | Area% |
|----------|---------|---------|-------------|-------|
| 12.634   | 642.114 | 92.94   | 12570.84940 | 93.26 |
| 13.505   | 48.798  | 7.06    | 908.76650   | 6.74  |

<sup>1</sup>H NMR (400 MHz, CDCl<sub>3</sub>) of compound **3va**

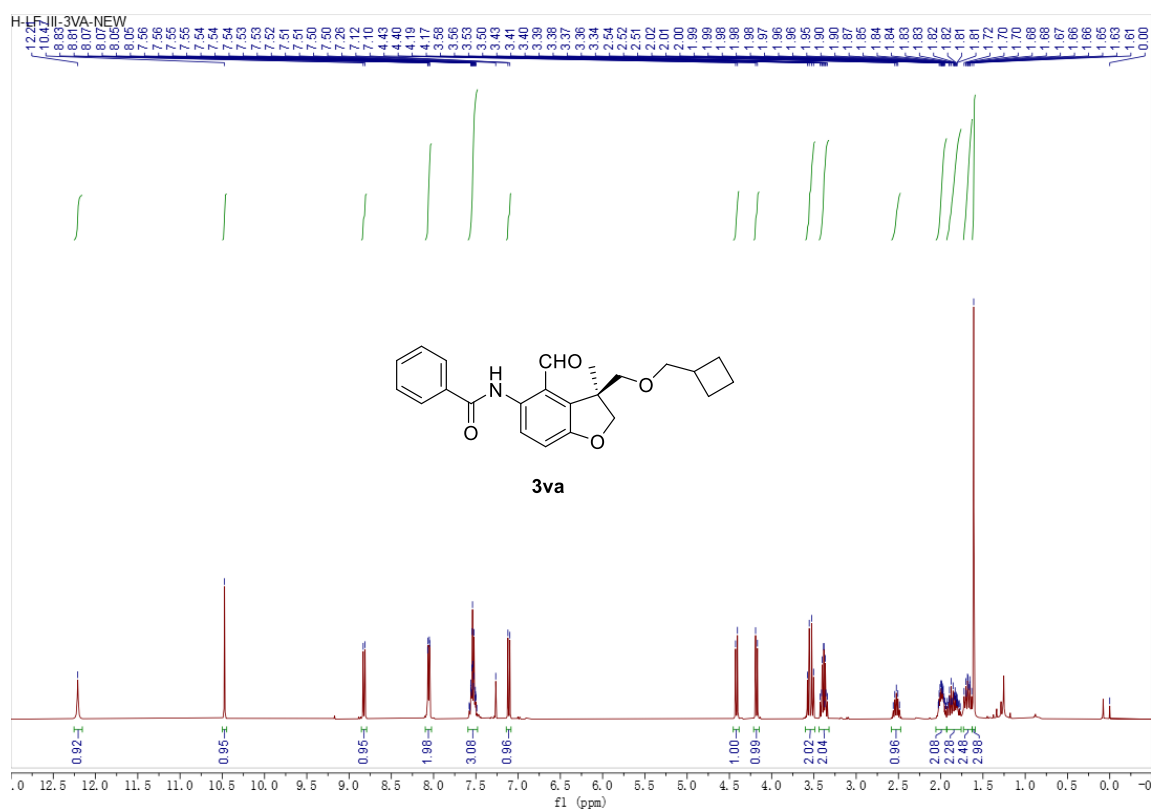

<sup>13</sup>C NMR (101 MHz, CDCl<sub>3</sub>) of compound **3va**

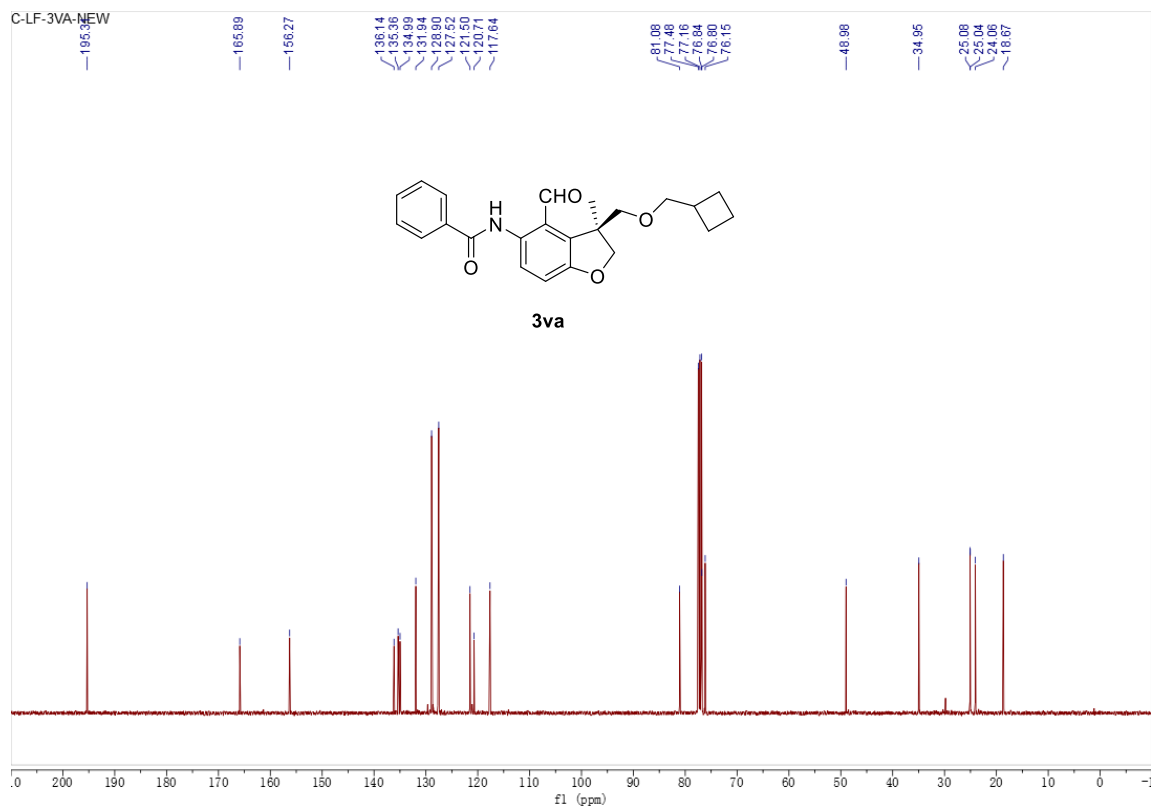

# HPLC spectra and data of compound 3va

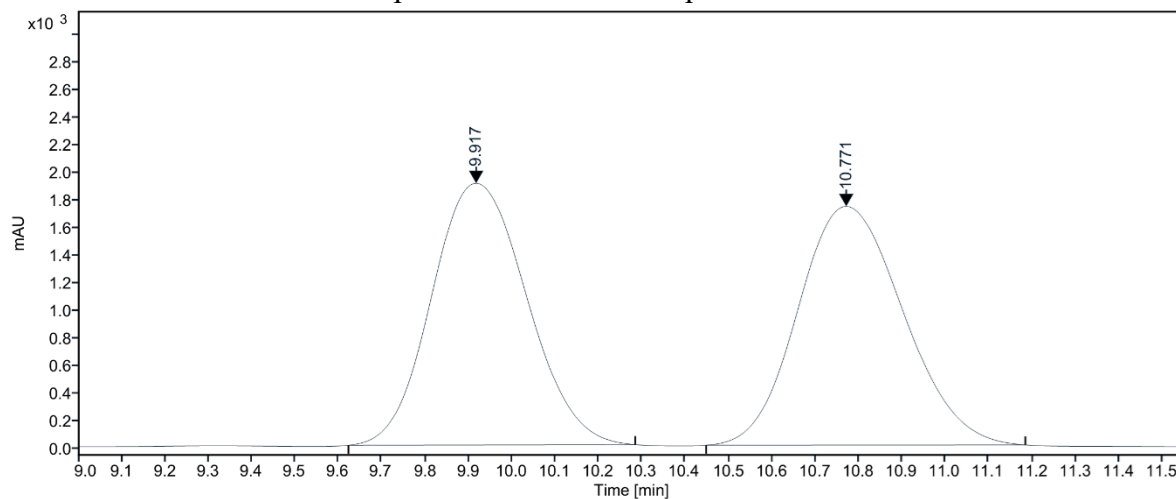

| RT [min] | Height   | Height% | Area        | Area% |
|----------|----------|---------|-------------|-------|
| 9.917    | 1901.956 | 52.30   | 29003.41422 | 49.78 |
| 10.771   | 1734.871 | 47.70   | 29259.35333 | 50.22 |

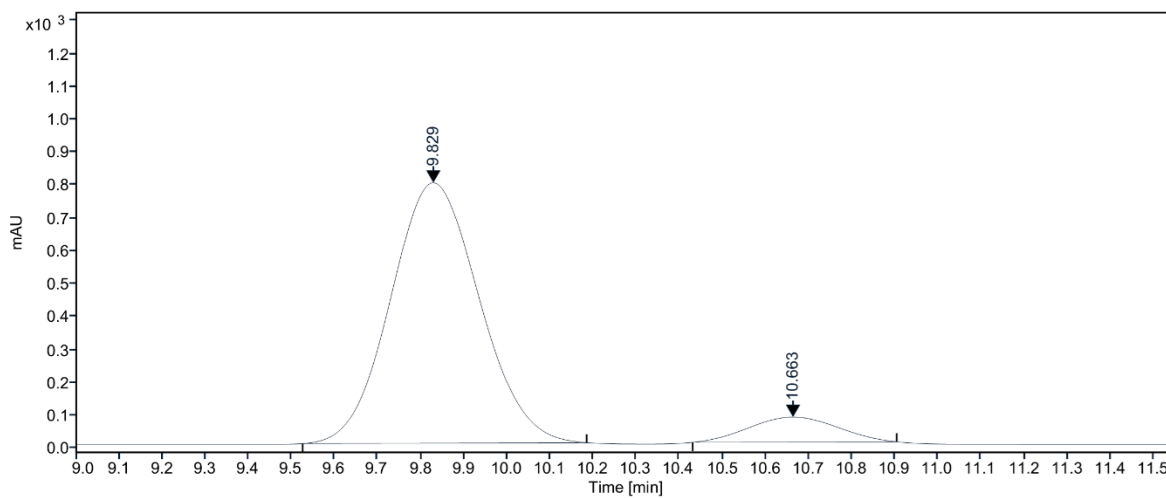

| RT [min] | Height  | Height% | Area        | Area% |
|----------|---------|---------|-------------|-------|
| 9.829    | 792.165 | 91.23   | 11316.13086 | 91.26 |
| 10.663   | 76.147  | 8.77    | 1084.28134  | 8.74  |

<sup>1</sup>H NMR (400 MHz, CDCl<sub>3</sub>) of compound **3wa**

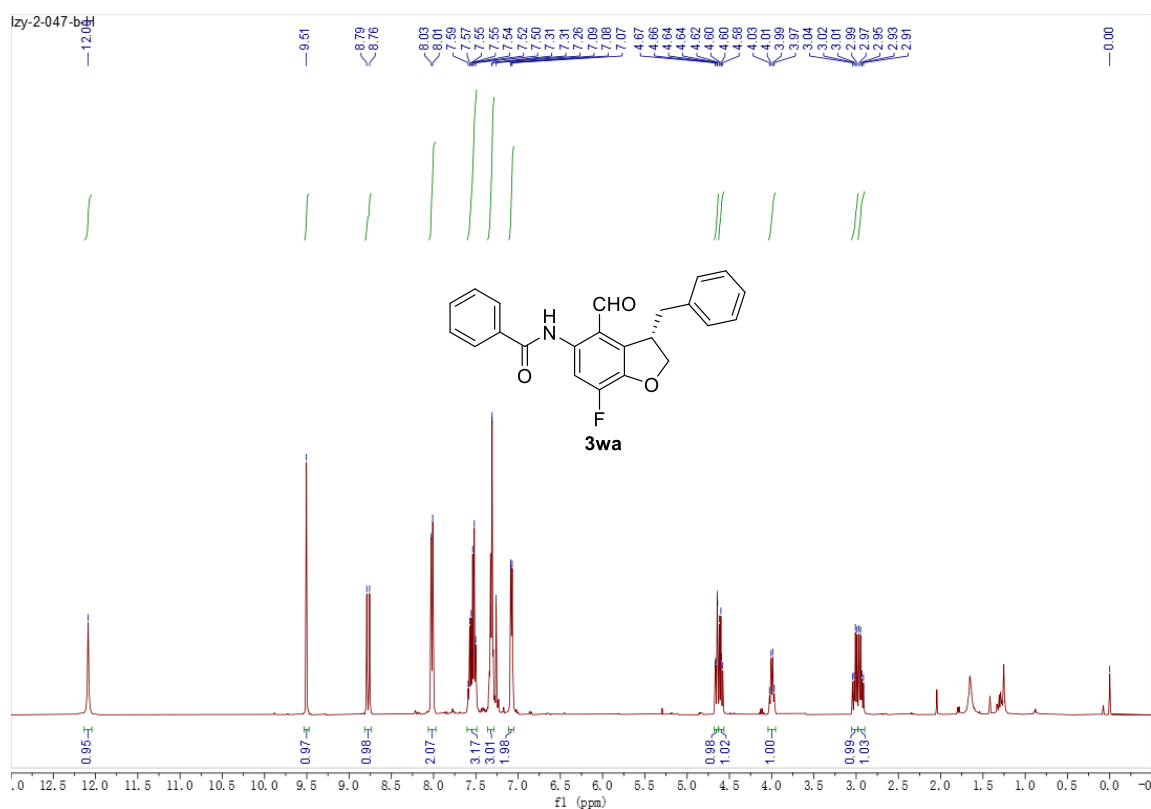

<sup>13</sup>C NMR (101 MHz, CDCl<sub>3</sub>) of compound **3wa**

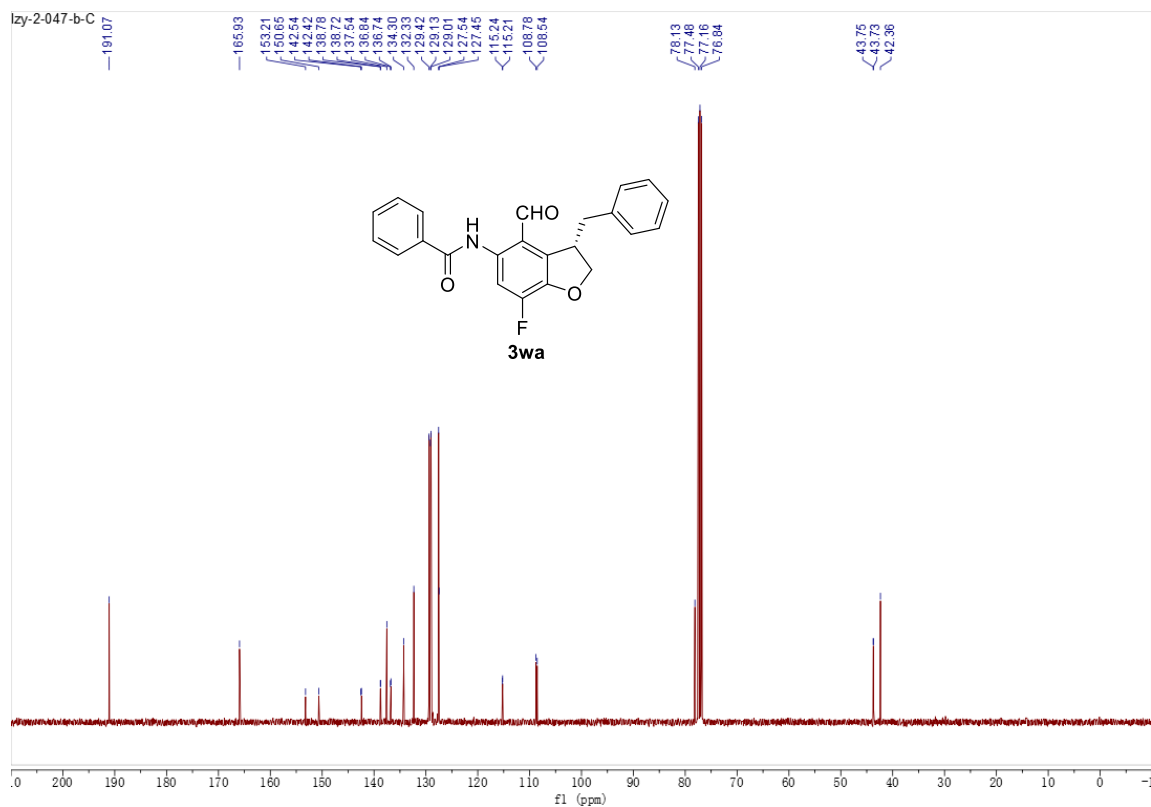

# HPLC spectra and data of compound 3wa

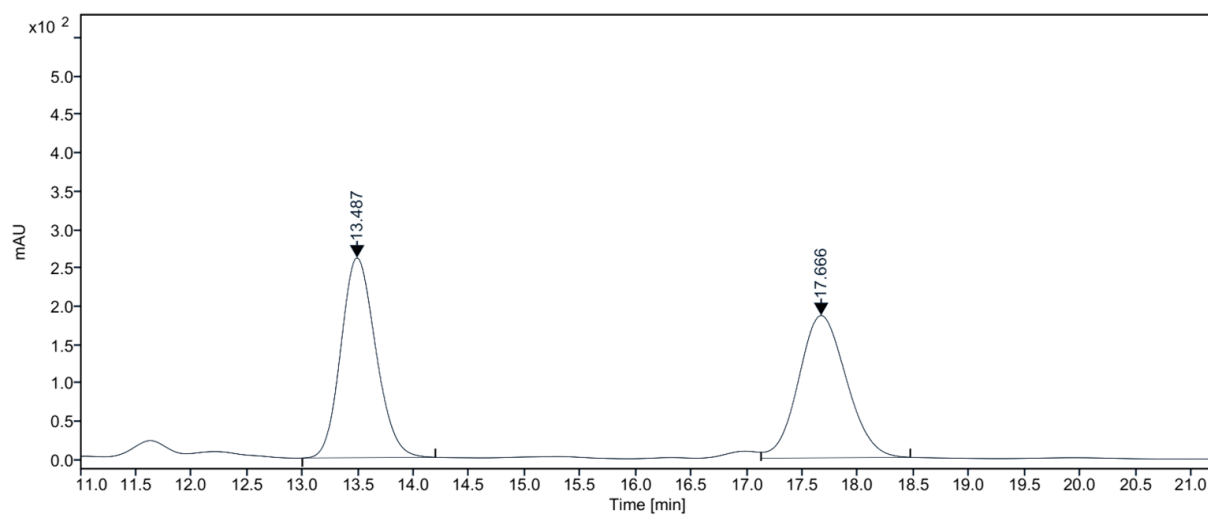

| RT [min] | Height  | Height% | Area       | Area% |
|----------|---------|---------|------------|-------|
| 13.487   | 260.464 | 58.39   | 5688.90916 | 50.56 |
| 17.666   | 185.625 | 41.61   | 5563.85477 | 49.44 |

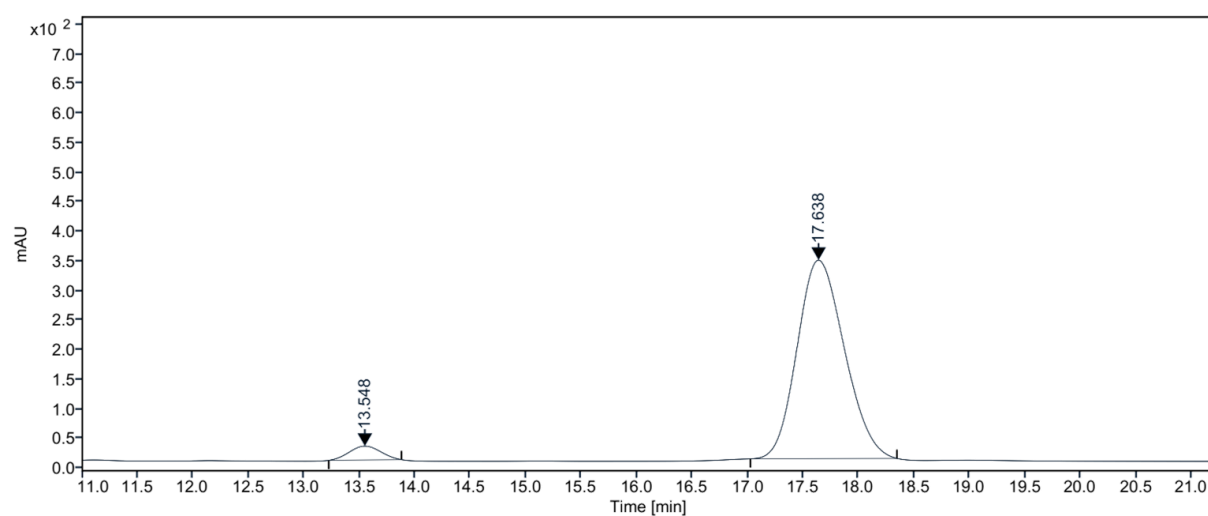

| RT [min] | Height  | Height% | Area       | Area% |
|----------|---------|---------|------------|-------|
| 13.548   | 23.461  | 6.54    | 460.32897  | 4.43  |
| 17.638   | 335.505 | 93.46   | 9939.02292 | 95.57 |

<sup>1</sup>H NMR (400 MHz, CDCl<sub>3</sub>) of compound **3xa**

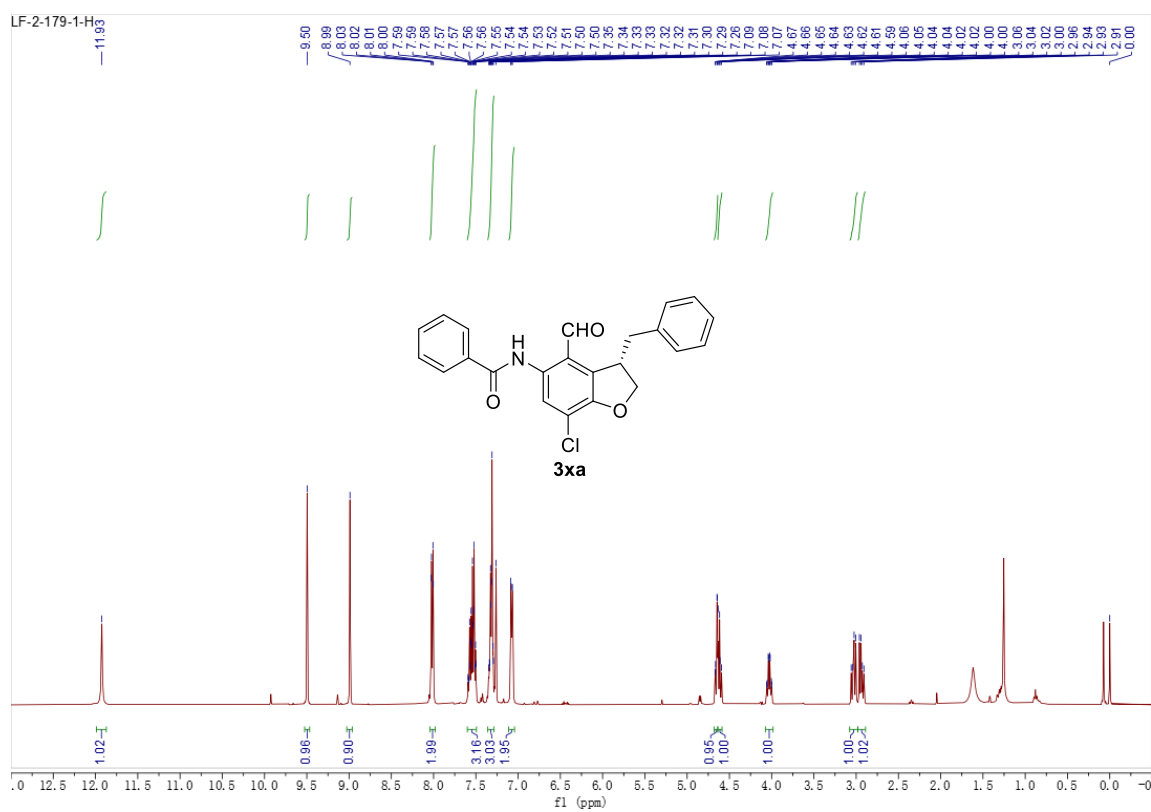

<sup>13</sup>C NMR (101 MHz, CDCl<sub>3</sub>) of compound **3xa**

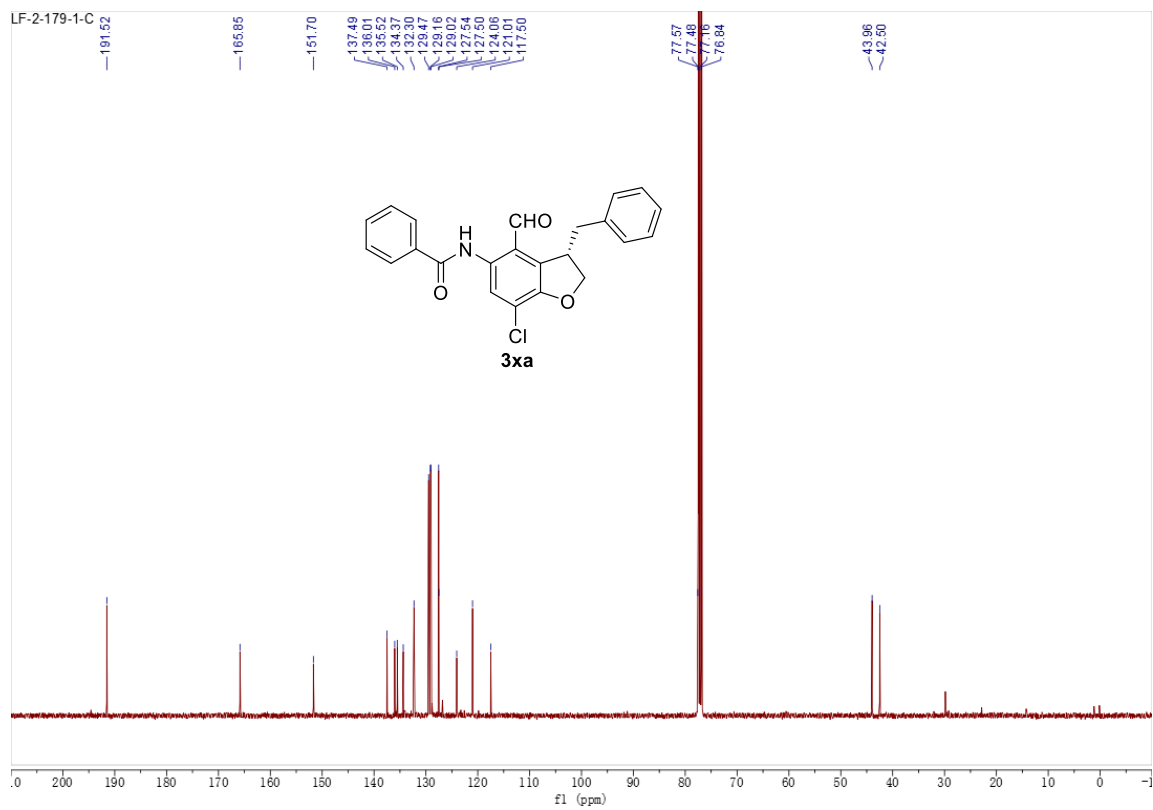

# HPLC spectra and data of compound **3xa**

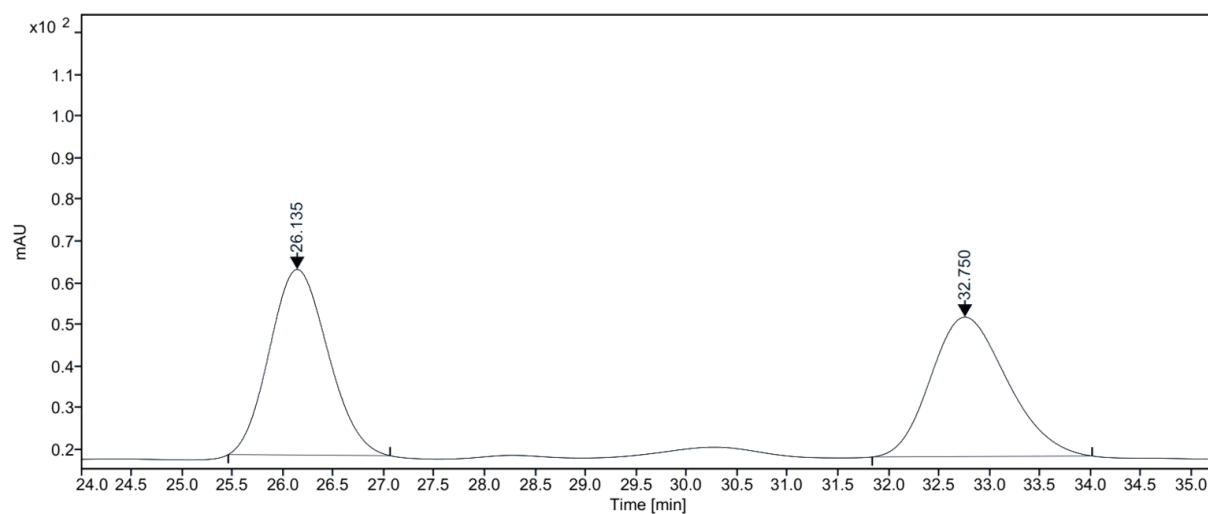

| RT [min] | Height | Height% | Area       | Area% |
|----------|--------|---------|------------|-------|
| 26.135   | 44.498 | 57.09   | 1790.07065 | 50.40 |
| 32.750   | 33.446 | 42.91   | 1761.55989 | 49.60 |

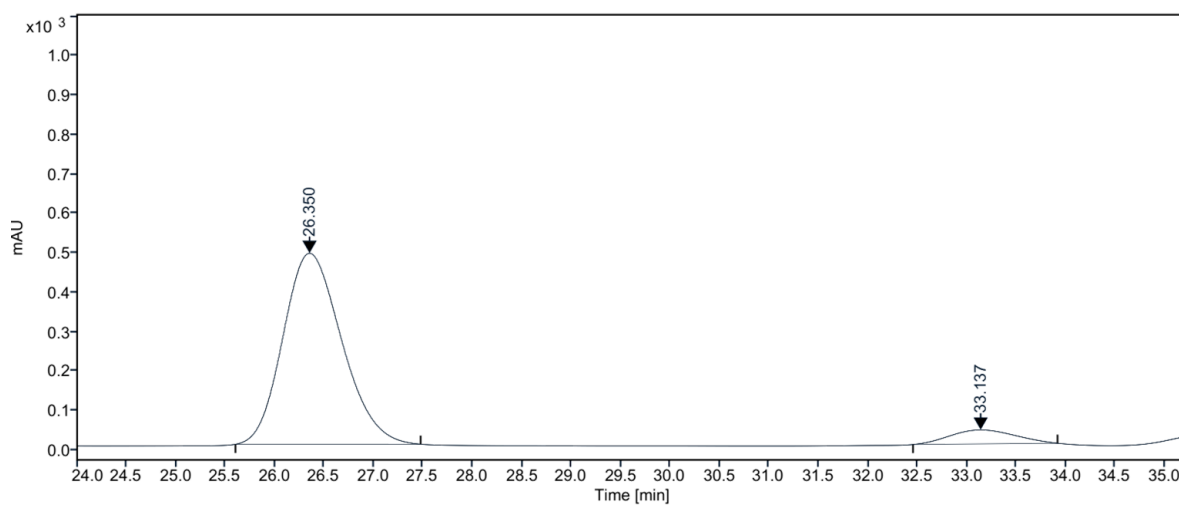

| RT [min] | Height  | Height% | Area        | Area% |
|----------|---------|---------|-------------|-------|
| 26.350   | 484.660 | 93.19   | 19989.82508 | 92.52 |
| 33.137   | 35.429  | 6.81    | 1616.67913  | 7.48  |

<sup>1</sup>H NMR (400 MHz, CDCl<sub>3</sub>) of compound **3ya**

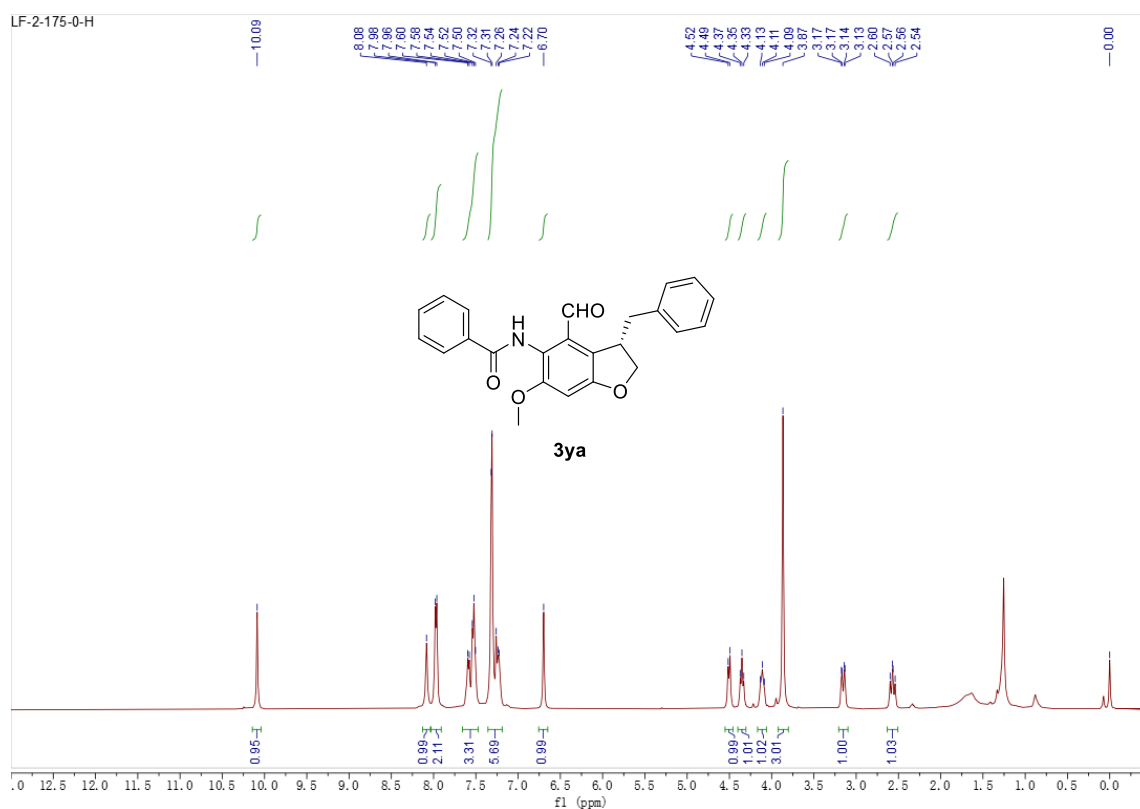

<sup>13</sup>C NMR (101 MHz, CDCl<sub>3</sub>) of compound **3ya**

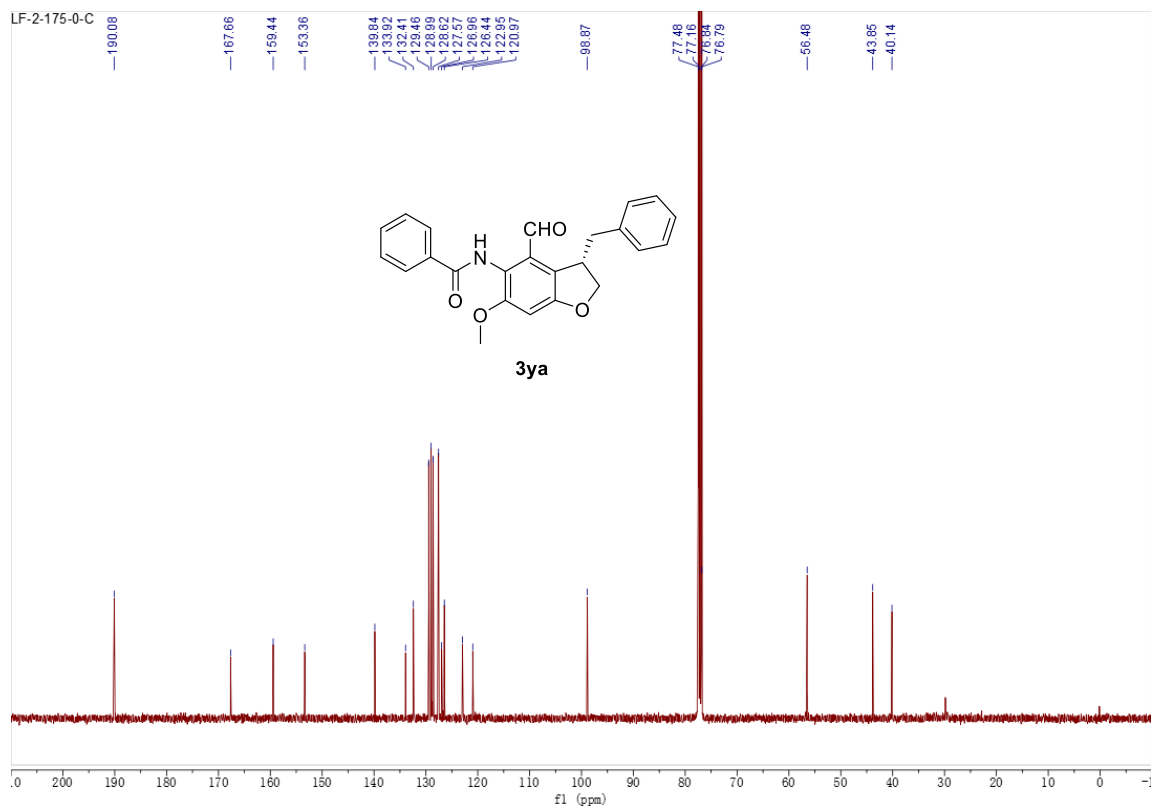

# HPLC spectra and data of compound **3ya**

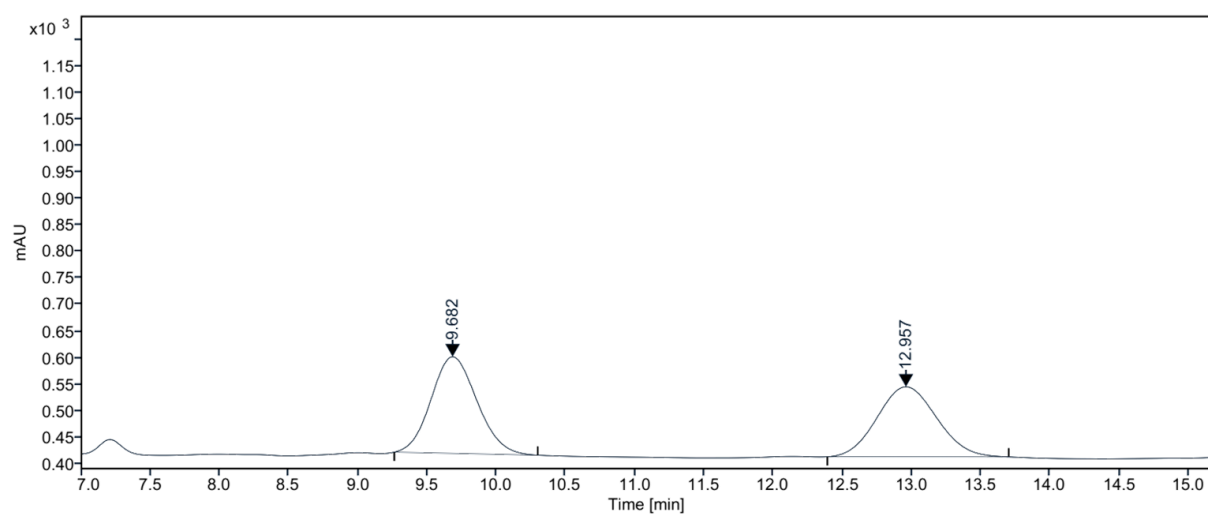

| RT [min] | Height  | Height% | Area       | Area% |
|----------|---------|---------|------------|-------|
| 9.682    | 182.063 | 57.98   | 4192.78467 | 51.53 |
| 12.957   | 131.961 | 42.02   | 3943.31139 | 48.47 |

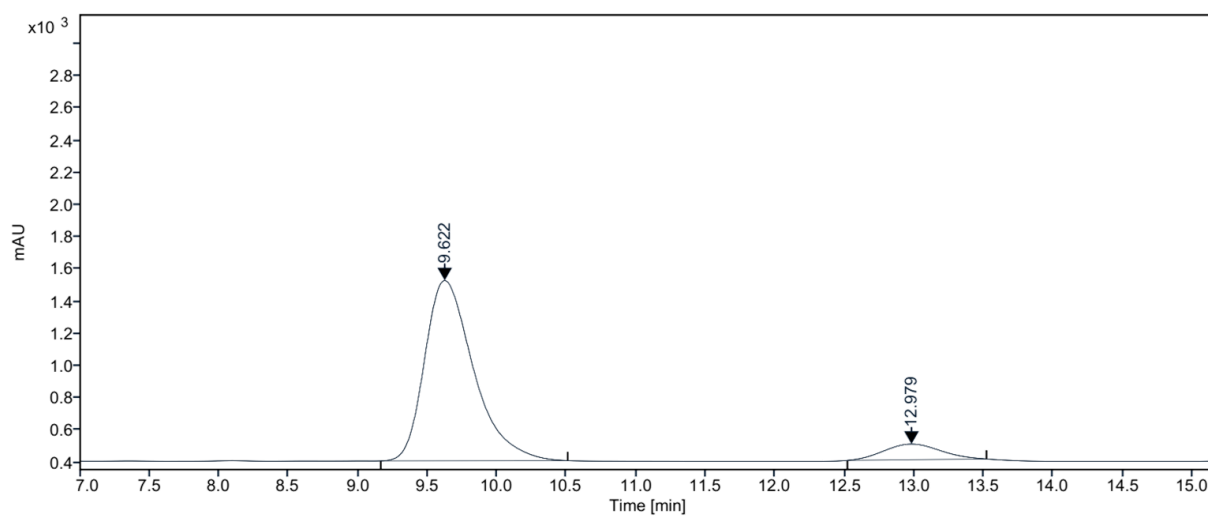

| RT [min] | Height   | Height% | Area        | Area% |
|----------|----------|---------|-------------|-------|
| 9.622    | 1120.270 | 92.00   | 27448.25459 | 90.86 |
| 12.979   | 97.430   | 8.00    | 2761.96801  | 9.14  |

<sup>1</sup>H NMR (400 MHz, CDCl<sub>3</sub>) of compound **3za**

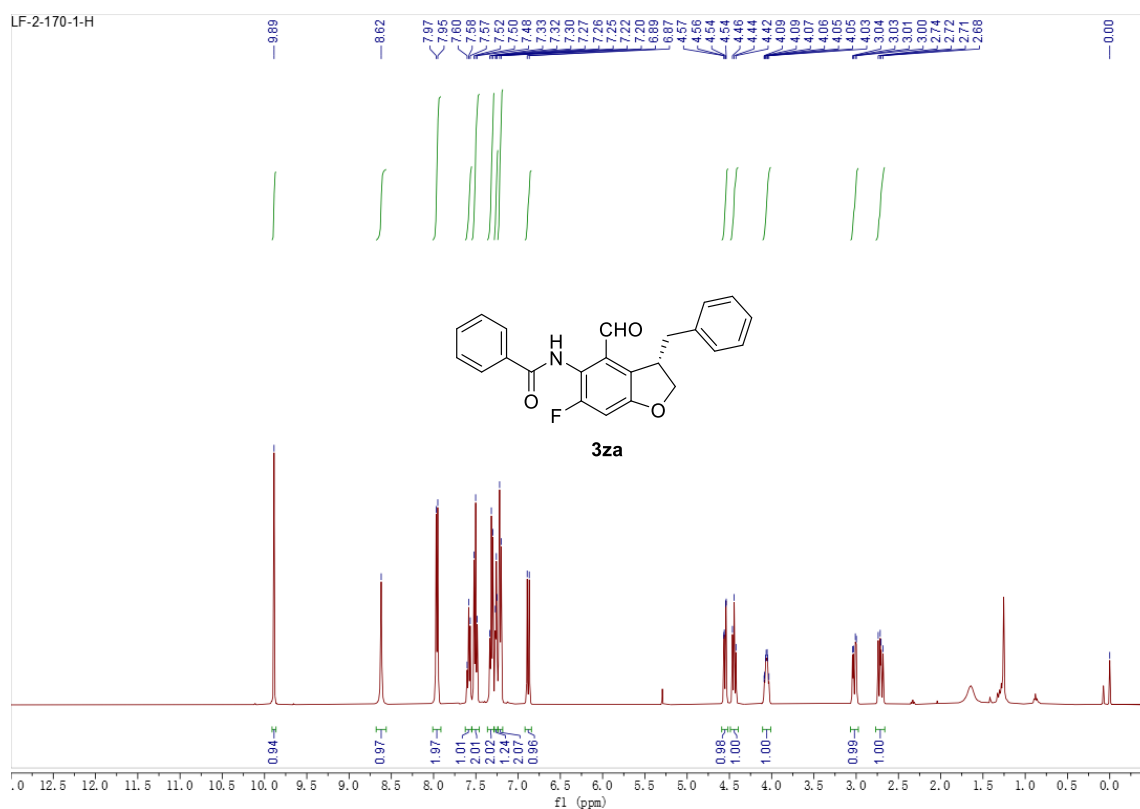

<sup>13</sup>C NMR (101 MHz, CDCl<sub>3</sub>) of compound **3za**

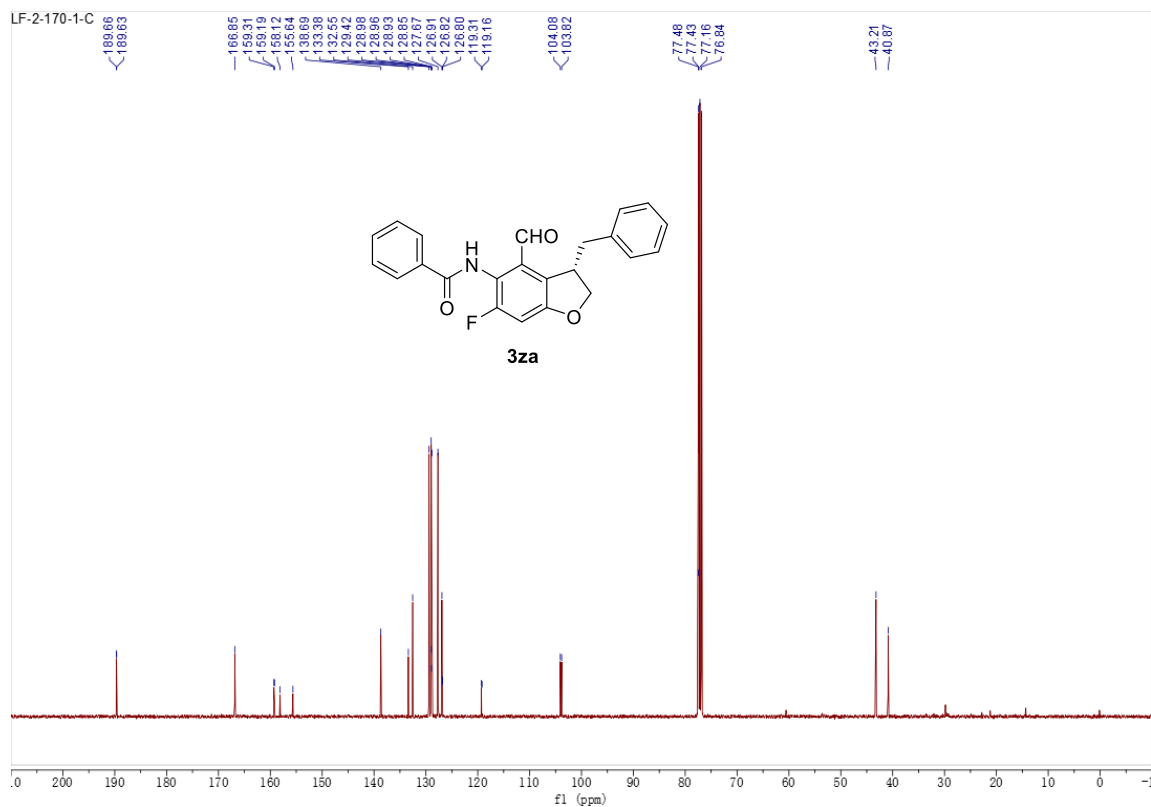

# HPLC spectra and data of compound **3za**

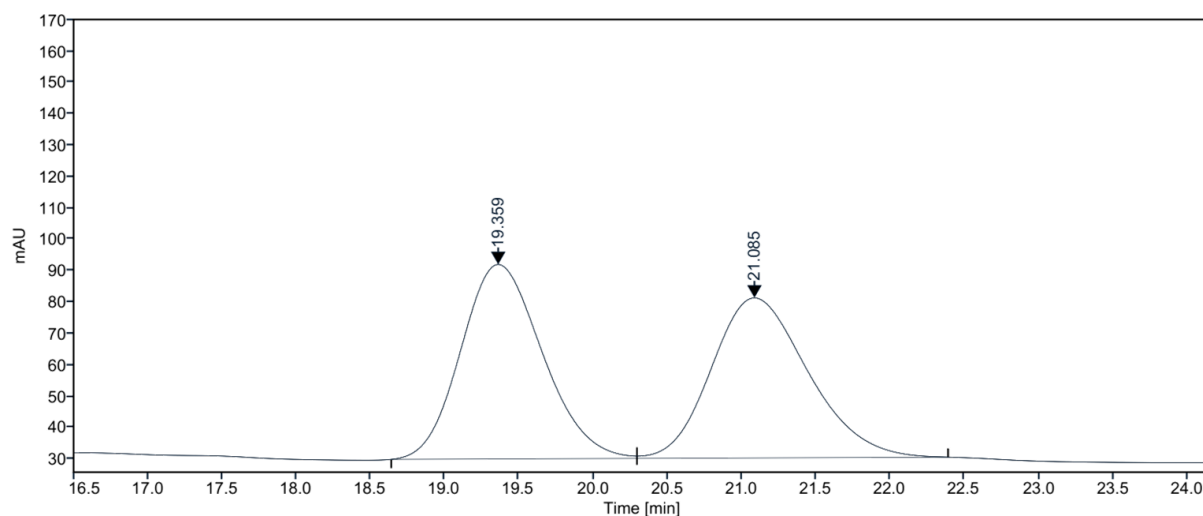

| RT [min] | Height | Height% | Area       | Area% |
|----------|--------|---------|------------|-------|
| 19.359   | 62.015 | 54.86   | 2364.68054 | 50.64 |
| 21.085   | 51.020 | 45.14   | 2304.98397 | 49.36 |

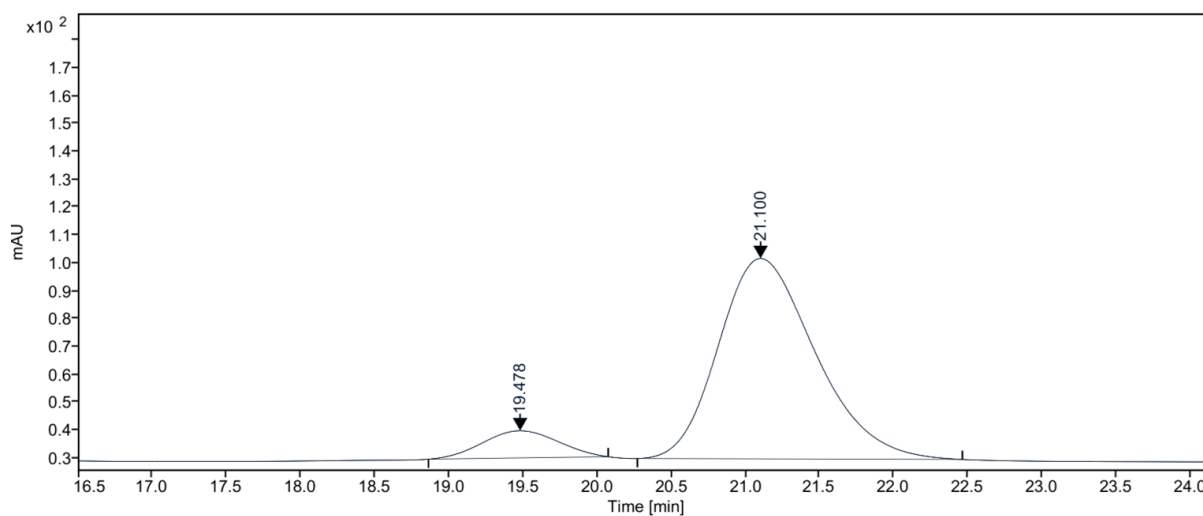

| RT [min] | Height | Height% | Area       | Area% |
|----------|--------|---------|------------|-------|
| 19.478   | 9.733  | 11.93   | 344.04322  | 9.54  |
| 21.100   | 71.859 | 88.07   | 3263.70923 | 90.46 |

<sup>1</sup>H NMR (400 MHz, CDCl<sub>3</sub>) of compound **3zaa**

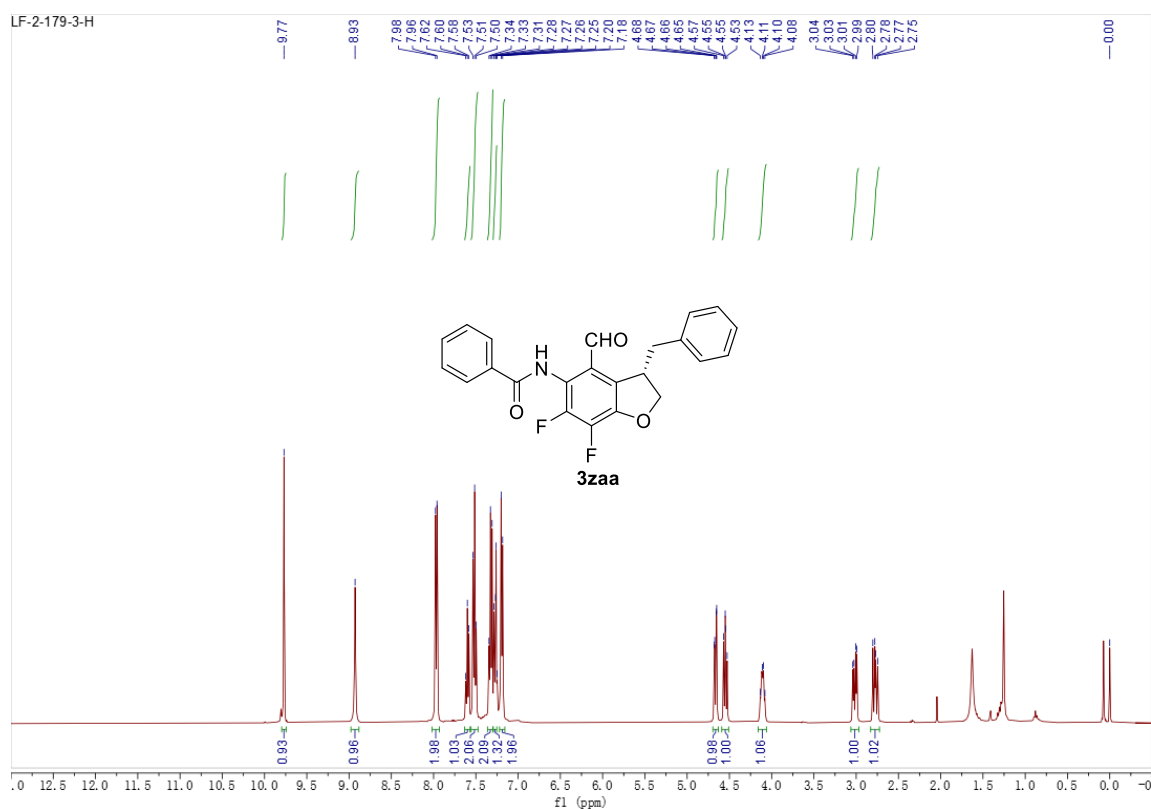

<sup>13</sup>C NMR (101 MHz, CDCl<sub>3</sub>) of compound **3zaa**

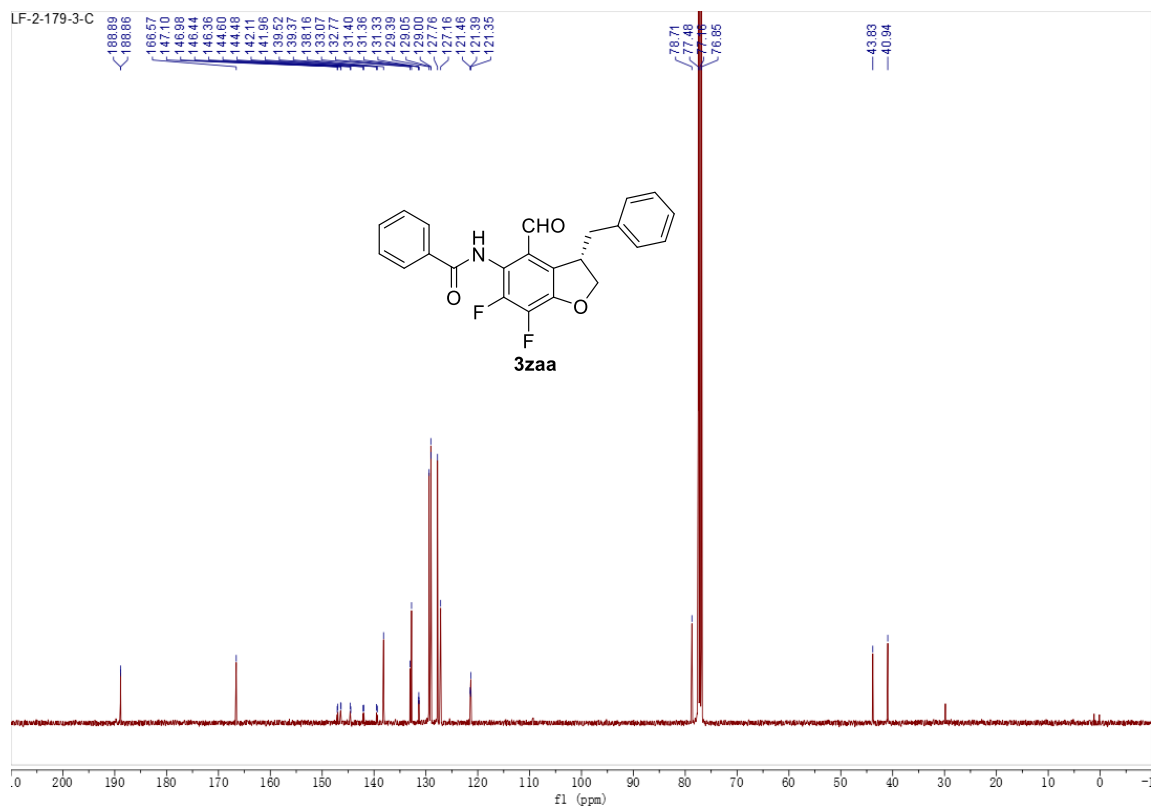

# HPLC spectra and data of compound **3zaa**

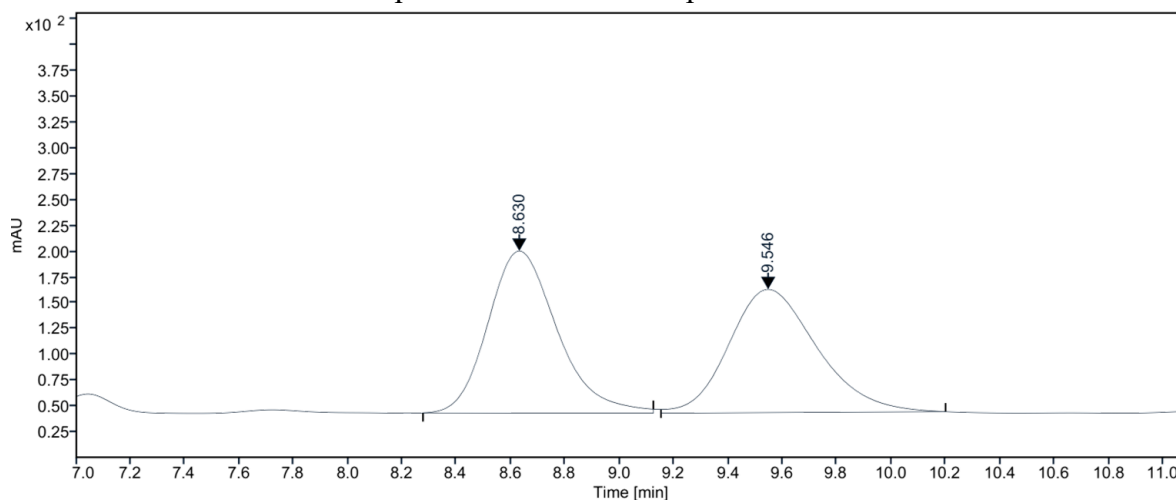

| RT [min] | Height  | Height% | Area       | Area% |
|----------|---------|---------|------------|-------|
| 8.630    | 156.681 | 56.79   | 2776.59394 | 50.78 |
| 9.546    | 119.207 | 43.21   | 2690.79094 | 49.22 |

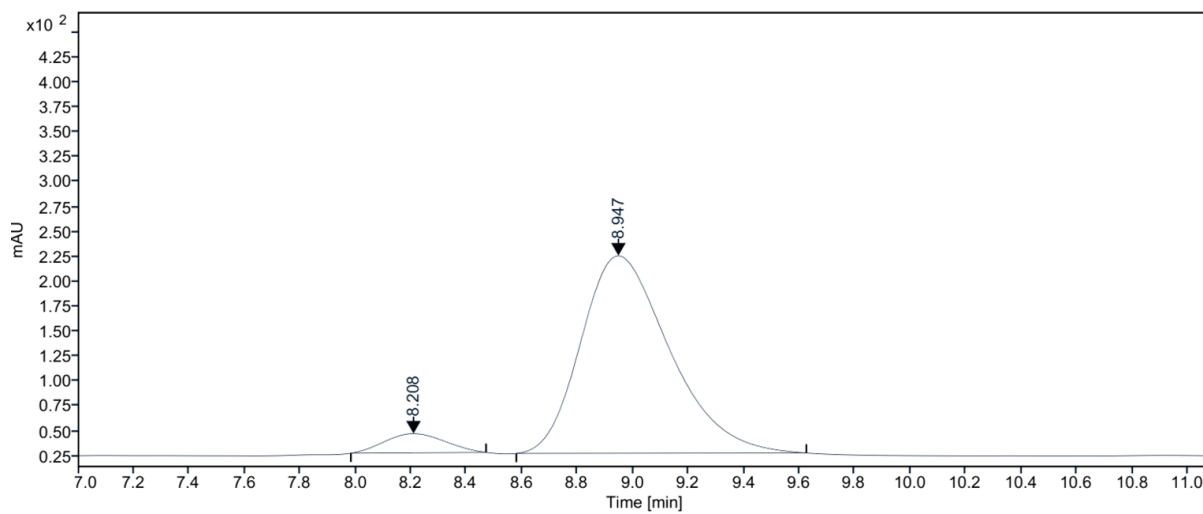

| RT [min] | Height  | Height% | Area       | Area% |
|----------|---------|---------|------------|-------|
| 8.208    | 19.178  | 8.83    | 290.41814  | 6.20  |
| 8.947    | 198.090 | 91.17   | 4396.15056 | 93.80 |

# <sup>1</sup>H NMR (400 MHz, CDCl<sub>3</sub>) of compound **3ab**

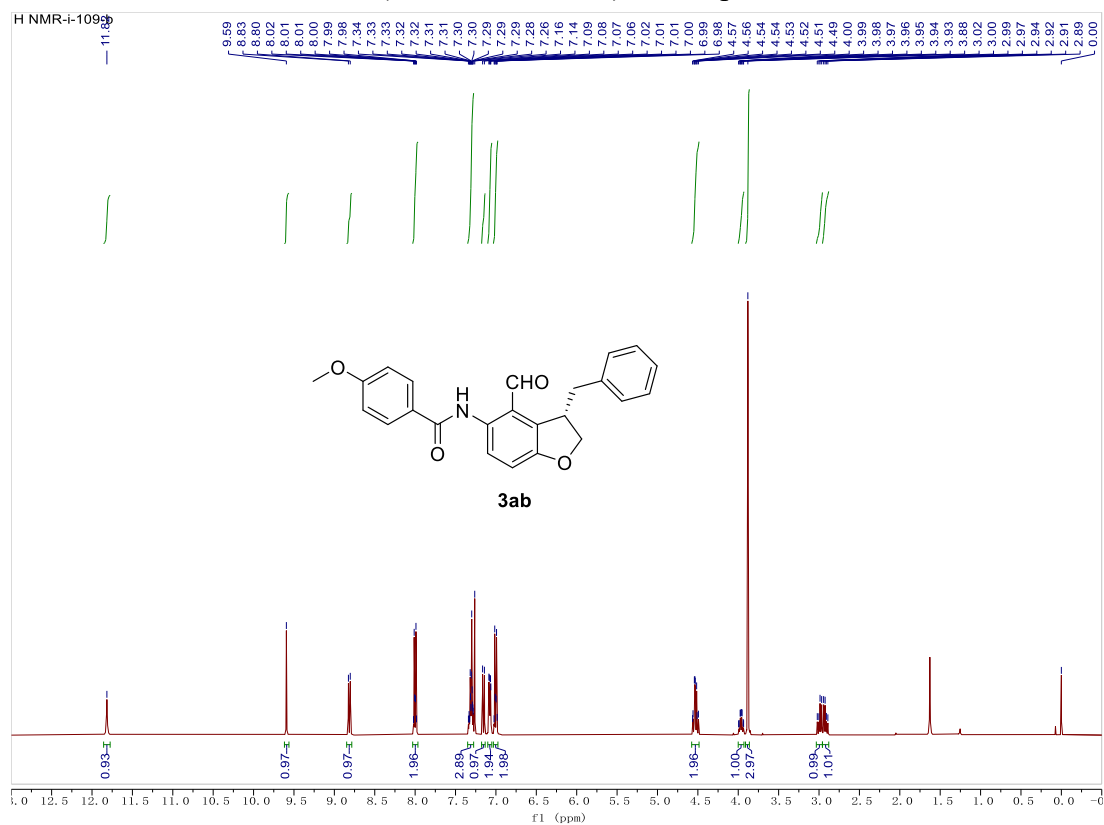

# <sup>13</sup>C NMR (101 MHz, CDCl<sub>3</sub>) of compound **3ab**

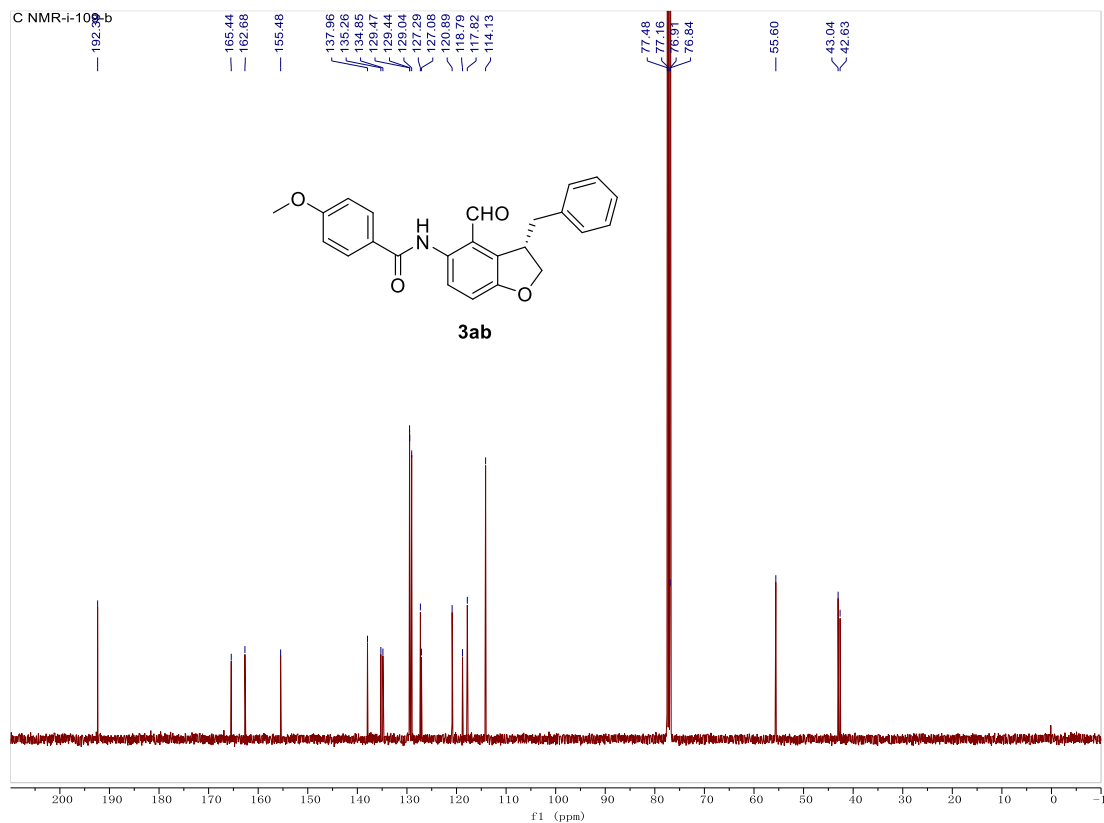

# HPLC spectra and data of compound **3ab**

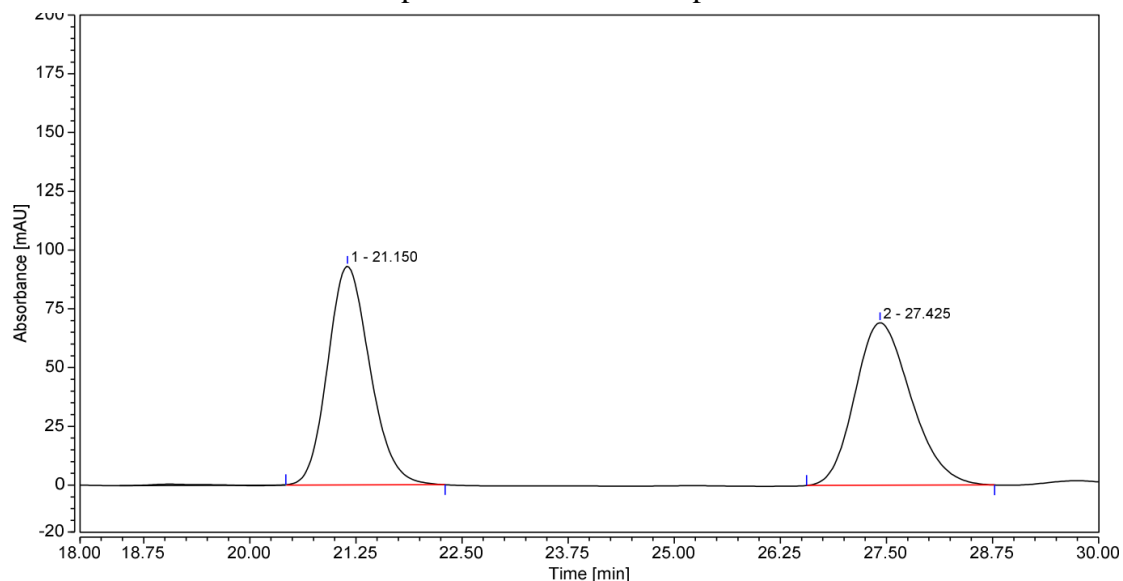

| Integration Results |           |                       |                 |               |                    |                      |                |
|---------------------|-----------|-----------------------|-----------------|---------------|--------------------|----------------------|----------------|
| No.                 | Peak Name | Retention Time<br>min | Area<br>mAU*min | Height<br>mAU | Relative Area<br>% | Relative Height<br>% | Amount<br>n.a. |
| 1                   |           | 21.150                | 53.775          | 93.035        | 50.32              | 57.36                | n.a.           |
| 2                   |           | 27.425                | 53.084          | 69.159        | 49.68              | 42.64                | n.a.           |
| Total:              |           |                       | 106.859         | 162.194       | 100.00             | 100.00               |                |

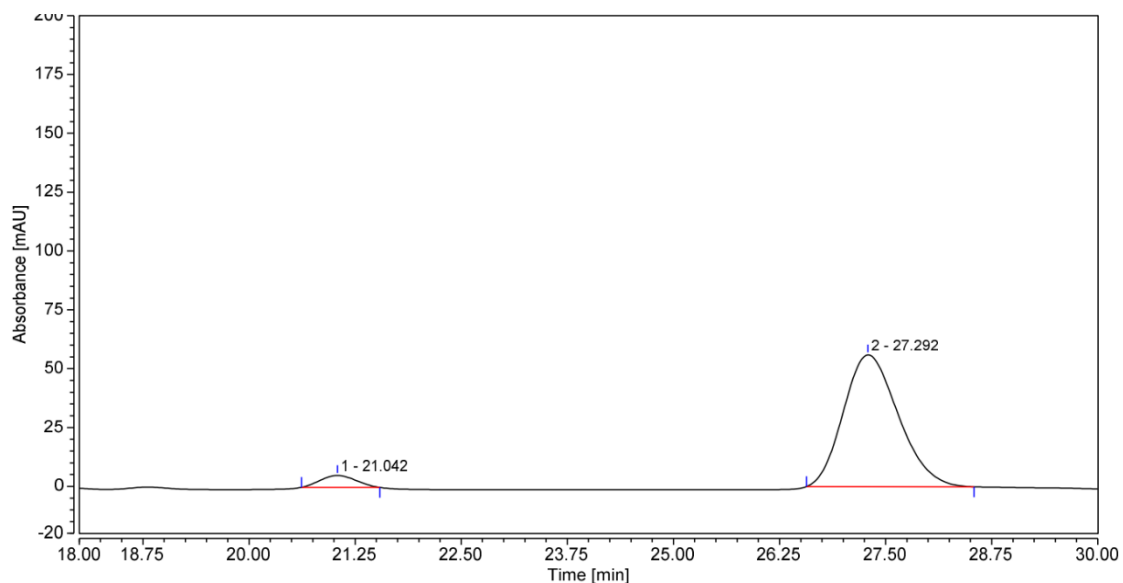

| Integration Results |           |                       |                 |               |                    |                      |                |
|---------------------|-----------|-----------------------|-----------------|---------------|--------------------|----------------------|----------------|
| No.                 | Peak Name | Retention Time<br>min | Area<br>mAU*min | Height<br>mAU | Relative Area<br>% | Relative Height<br>% | Amount<br>n.a. |
| 1                   |           | 21.042                | 2.457           | 5.038         | 5.53               | 8.25                 | n.a.           |
| 2                   |           | 27.292                | 41.947          | 56.004        | 94.47              | 91.75                | n.a.           |
| Total:              |           |                       | 44.404          | 61.042        | 100.00             | 100.00               |                |

<sup>1</sup>H NMR (400 MHz, CDCl<sub>3</sub>) of compound **3ac**

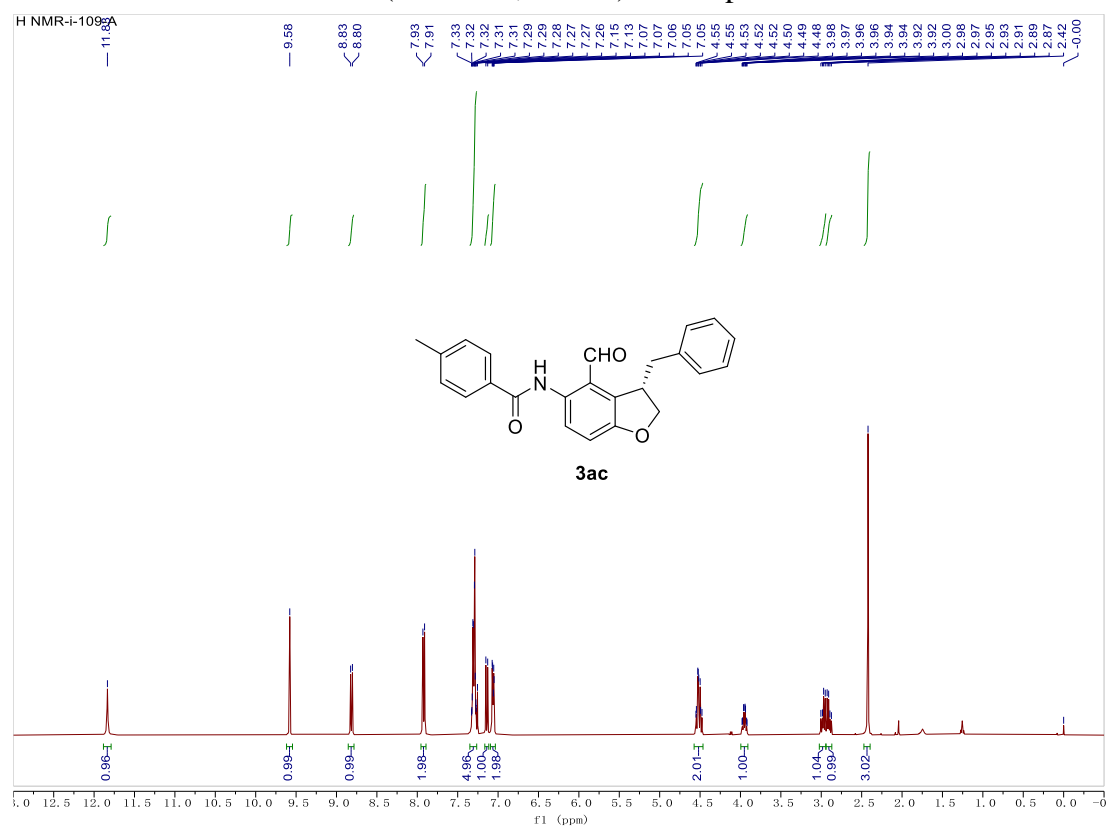

# HPLC spectra and data of compound 3ac

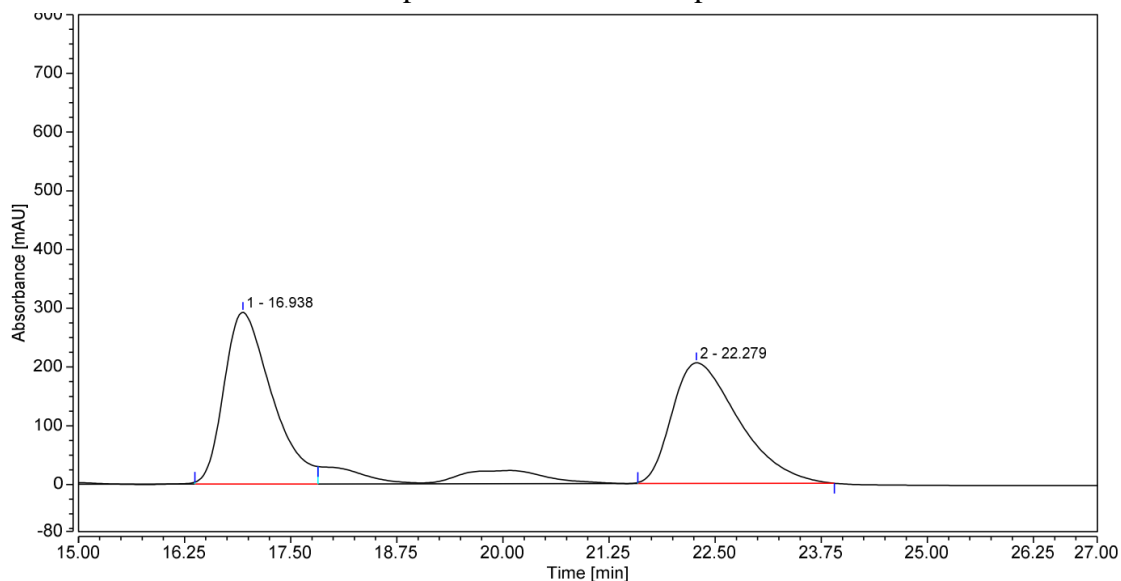

| Integration Results |           |                       |                 |               |                    |                      |                |
|---------------------|-----------|-----------------------|-----------------|---------------|--------------------|----------------------|----------------|
| No.                 | Peak Name | Retention Time<br>min | Area<br>mAU*min | Height<br>mAU | Relative Area<br>% | Relative Height<br>% | Amount<br>n.a. |
| 1                   |           | 16.938                | 191.293         | 292.406       | 50.56              | 58.74                | n.a.           |
| 2                   |           | 22.279                | 187.083         | 205.366       | 49.44              | 41.26                | n.a.           |
| Total:              |           |                       | 378.376         | 497.772       | 100.00             | 100.00               |                |

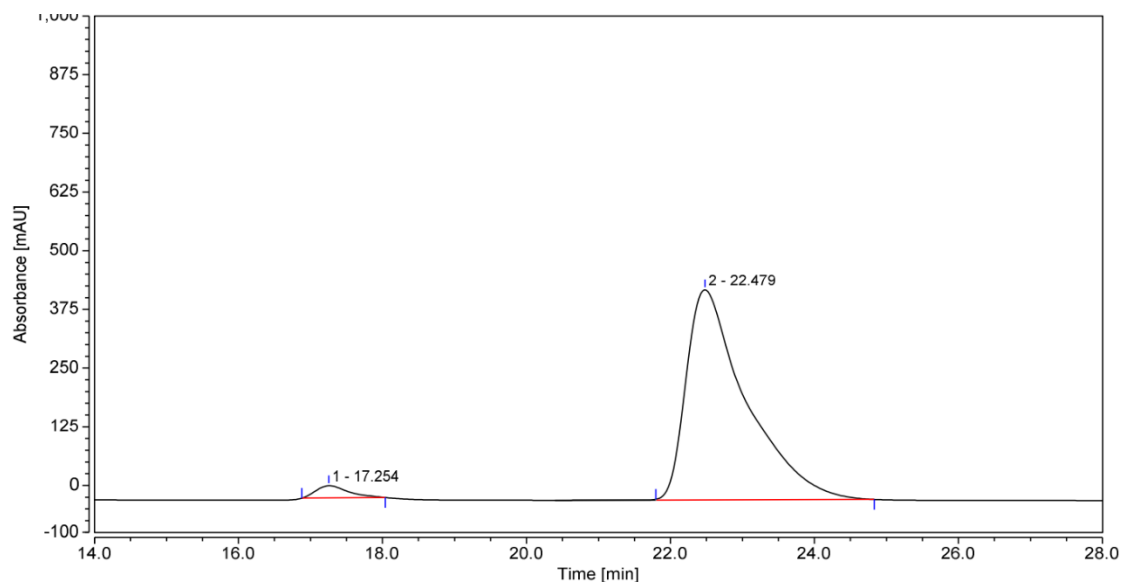

| Integration Results |           |                       |                 |               |                    |                      |                |
|---------------------|-----------|-----------------------|-----------------|---------------|--------------------|----------------------|----------------|
| No.                 | Peak Name | Retention Time<br>min | Area<br>mAU*min | Height<br>mAU | Relative Area<br>% | Relative Height<br>% | Amount<br>n.a. |
| 1                   |           | 17.254                | 13.687          | 26.002        | 3.09               | 5.49                 | n.a.           |
| 2                   |           | 22.479                | 429.470         | 447.652       | 96.91              | 94.51                | n.a.           |
| Total:              |           |                       | 443.157         | 473.654       | 100.00             | 100.00               |                |

<sup>1</sup>H NMR (400 MHz, CDCl<sub>3</sub>) of compound **3ad**

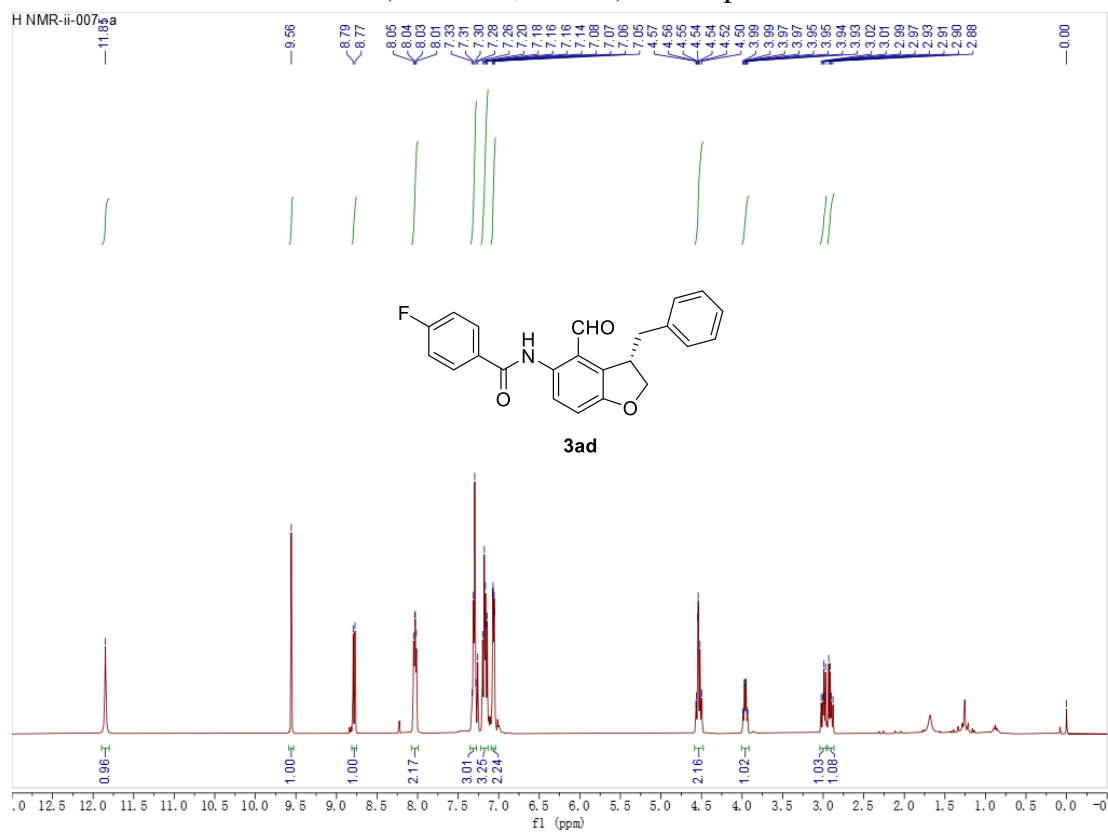

<sup>13</sup>C NMR (101 MHz, CDCl<sub>3</sub>) of compound **3ad**

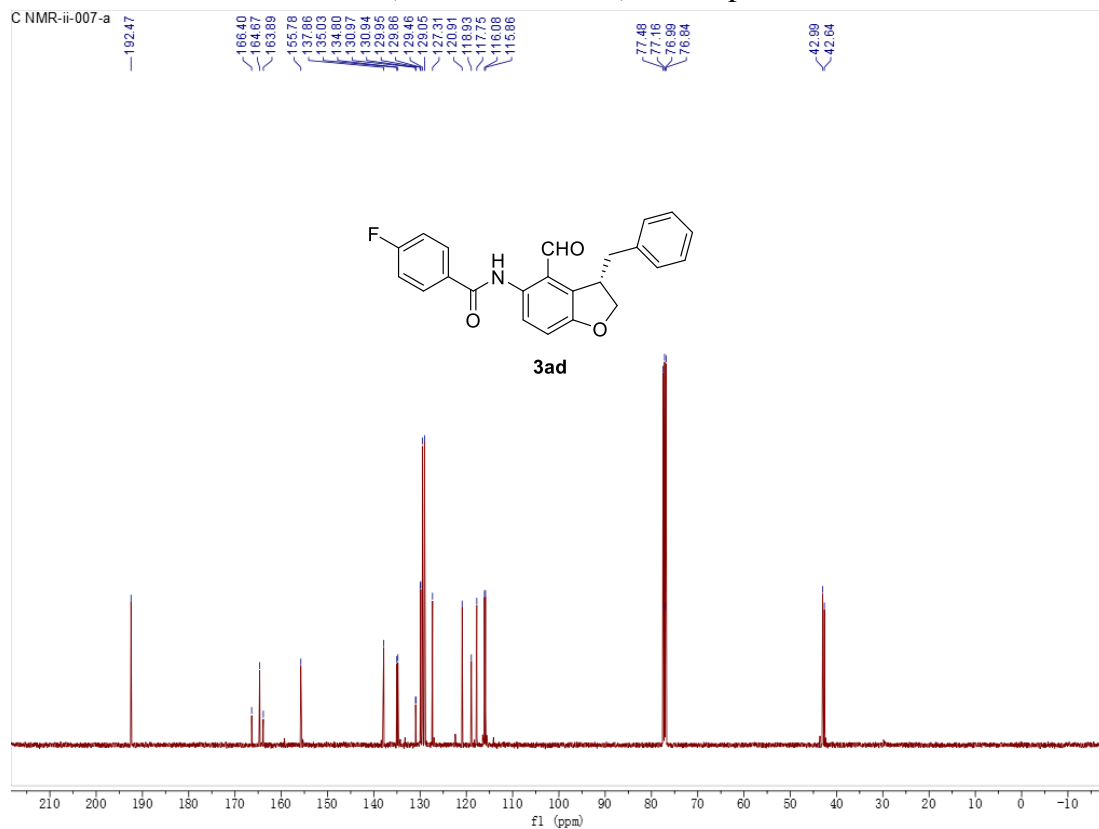

# HPLC spectra and data of compound 3ad

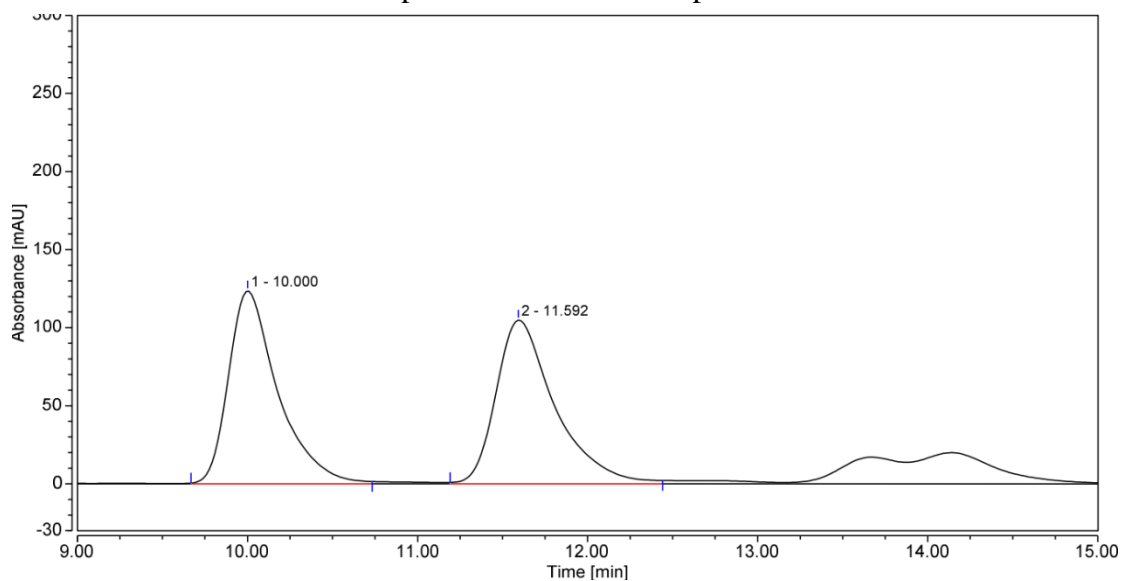

| Integration Results |           |                       |                 |               |                    |                      |                |
|---------------------|-----------|-----------------------|-----------------|---------------|--------------------|----------------------|----------------|
| No.                 | Peak Name | Retention Time<br>min | Area<br>mAU*min | Height<br>mAU | Relative Area<br>% | Relative Height<br>% | Amount<br>n.a. |
| 1                   |           | 10.000                | 41.655          | 123.588       | 49.72              | 54.09                | n.a.           |
| 2                   |           | 11.592                | 42.118          | 104.908       | 50.28              | 45.91                | n.a.           |
| Total:              |           |                       | 83.774          | 228.496       | 100.00             | 100.00               |                |

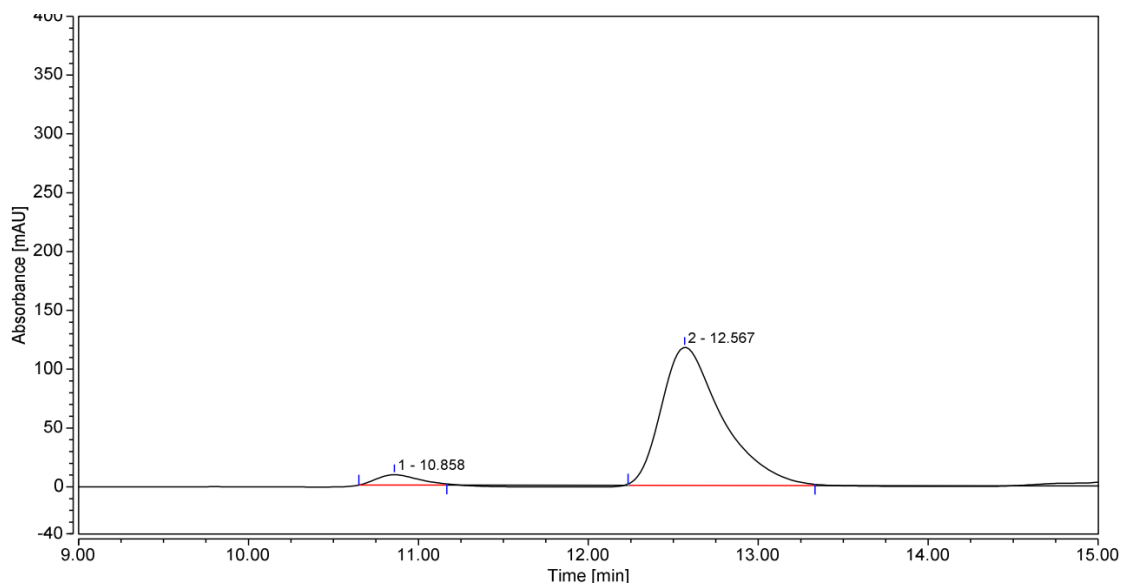

| Integration Results |           |                       |                 |               |                    |                      |                |
|---------------------|-----------|-----------------------|-----------------|---------------|--------------------|----------------------|----------------|
| No.                 | Peak Name | Retention Time<br>min | Area<br>mAU*min | Height<br>mAU | Relative Area<br>% | Relative Height<br>% | Amount<br>n.a. |
| 1                   |           | 10.858                | 2.520           | 8.804         | 4.93               | 6.98                 | n.a.           |
| 2                   |           | 12.567                | 48.577          | 117.382       | 95.07              | 93.02                | n.a.           |
| Total:              |           |                       | 51.097          | 126.186       | 100.00             | 100.00               |                |

<sup>1</sup>H NMR (400 MHz, CDCl<sub>3</sub>) of compound **3ae**

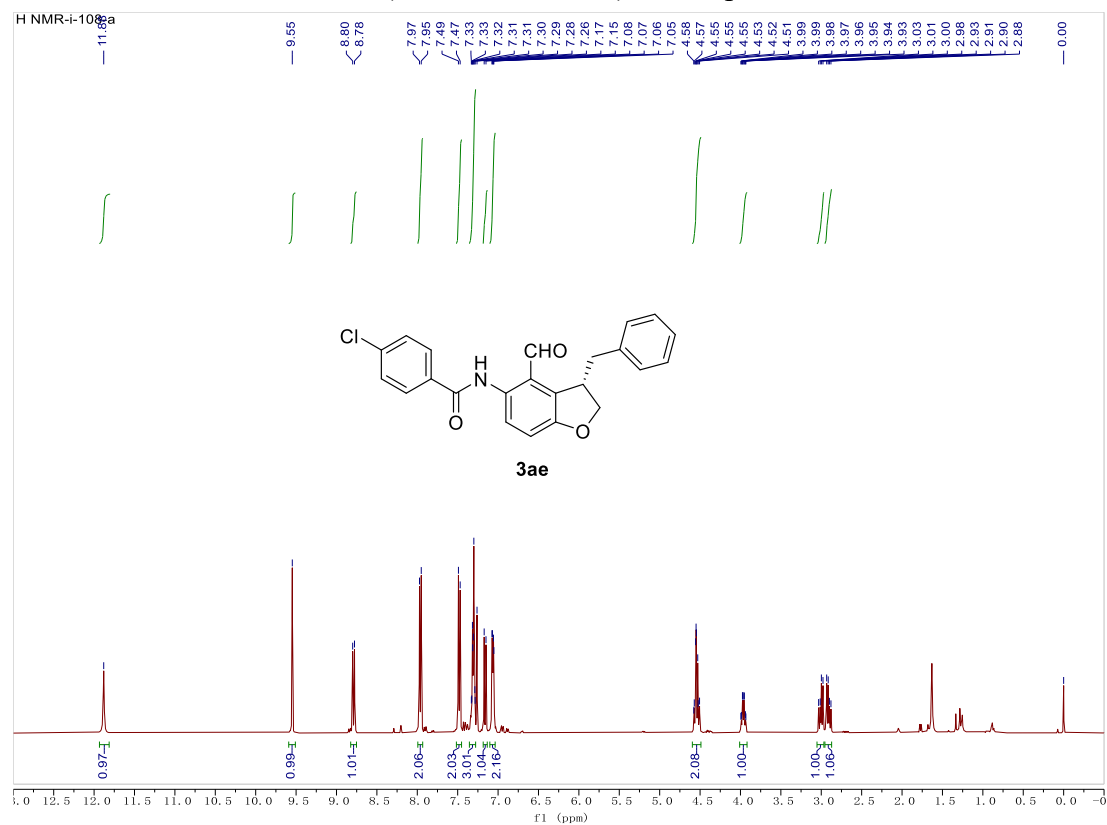

<sup>13</sup>C NMR (101 MHz, CDCl<sub>3</sub>) of compound **3ae**

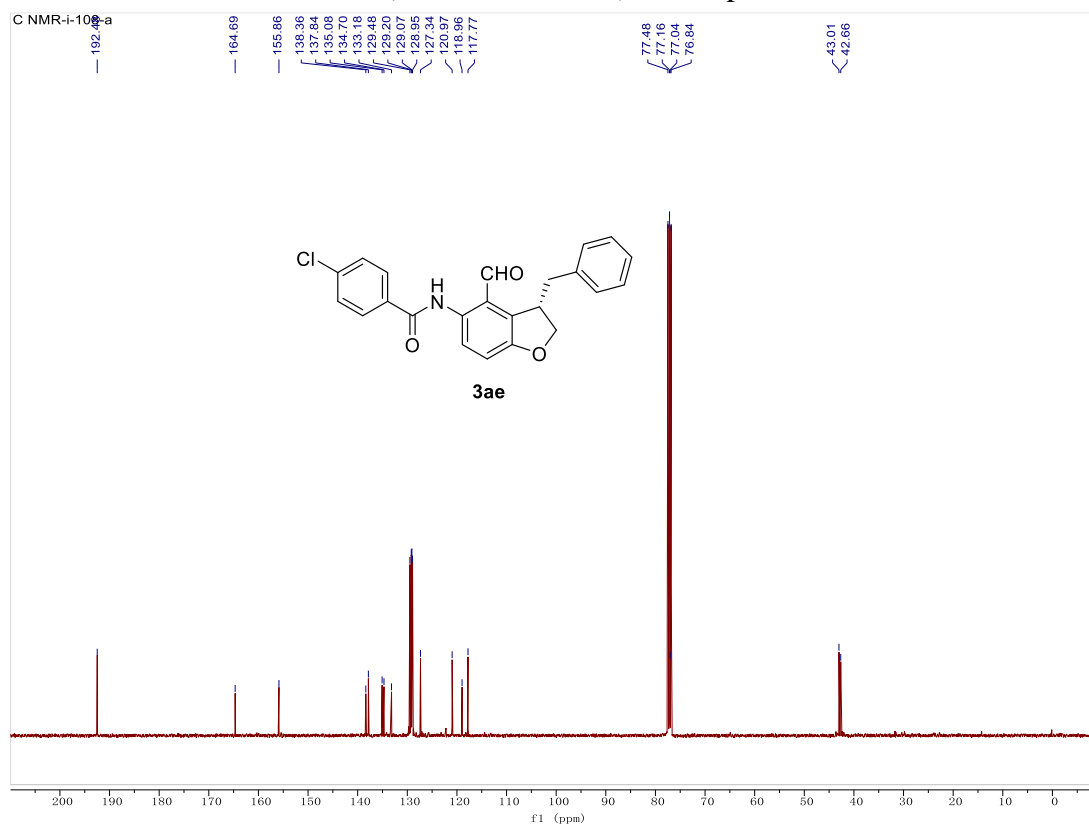

# HPLC spectra and data of compound 3ae

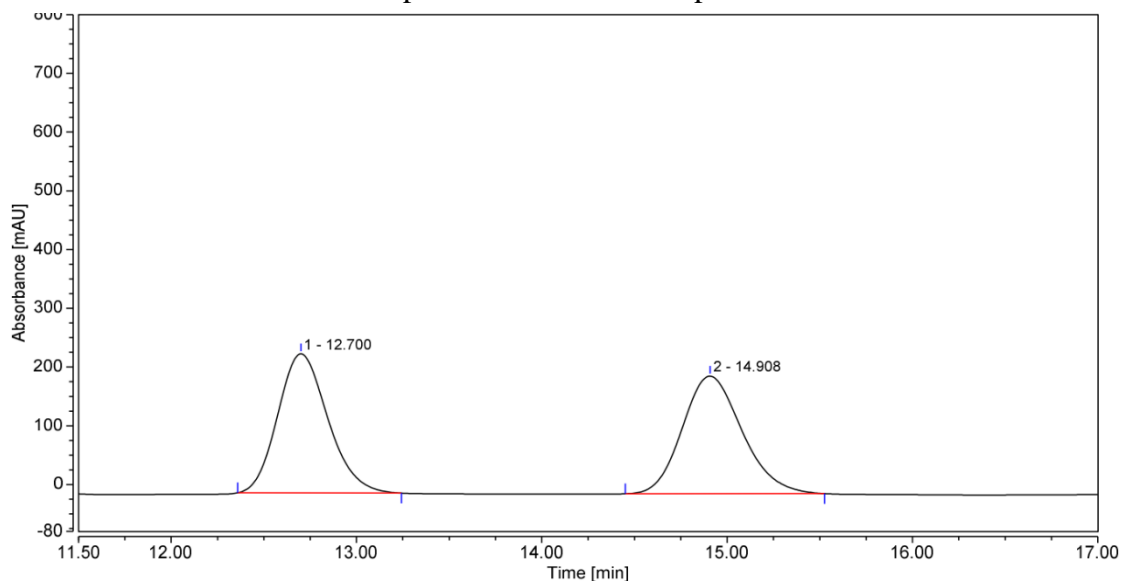

| Integration Results |           |                       |                 |               |                    |                      |                |
|---------------------|-----------|-----------------------|-----------------|---------------|--------------------|----------------------|----------------|
| No.                 | Peak Name | Retention Time<br>min | Area<br>mAU*min | Height<br>mAU | Relative Area<br>% | Relative Height<br>% | Amount<br>n.a. |
| 1                   |           | 12.700                | 74.411          | 236.826       | 49.85              | 54.18                | n.a.           |
| 2                   |           | 14.908                | 74.857          | 200.251       | 50.15              | 45.82                | n.a.           |
| Total:              |           |                       | 149.268         | 437.078       | 100.00             | 100.00               |                |

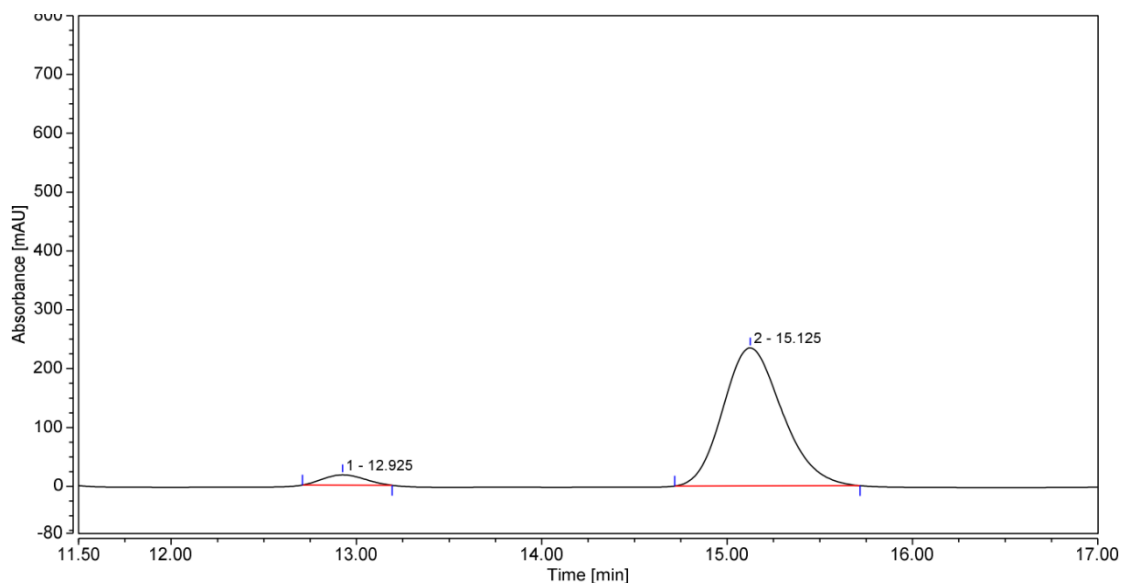

| Integration Results |           |                       |                 |               |                    |                      |                |
|---------------------|-----------|-----------------------|-----------------|---------------|--------------------|----------------------|----------------|
| No.                 | Peak Name | Retention Time<br>min | Area<br>mAU*min | Height<br>mAU | Relative Area<br>% | Relative Height<br>% | Amount<br>n.a. |
| 1                   |           | 12.925                | 4.510           | 17.475        | 4.93               | 6.93                 | n.a.           |
| 2                   |           | 15.125                | 86.898          | 234.639       | 95.07              | 93.07                | n.a.           |
| Total:              |           |                       | 91.408          | 252.113       | 100.00             | 100.00               |                |

<sup>1</sup>H NMR (400 MHz, CDCl<sub>3</sub>) of compound **3af**

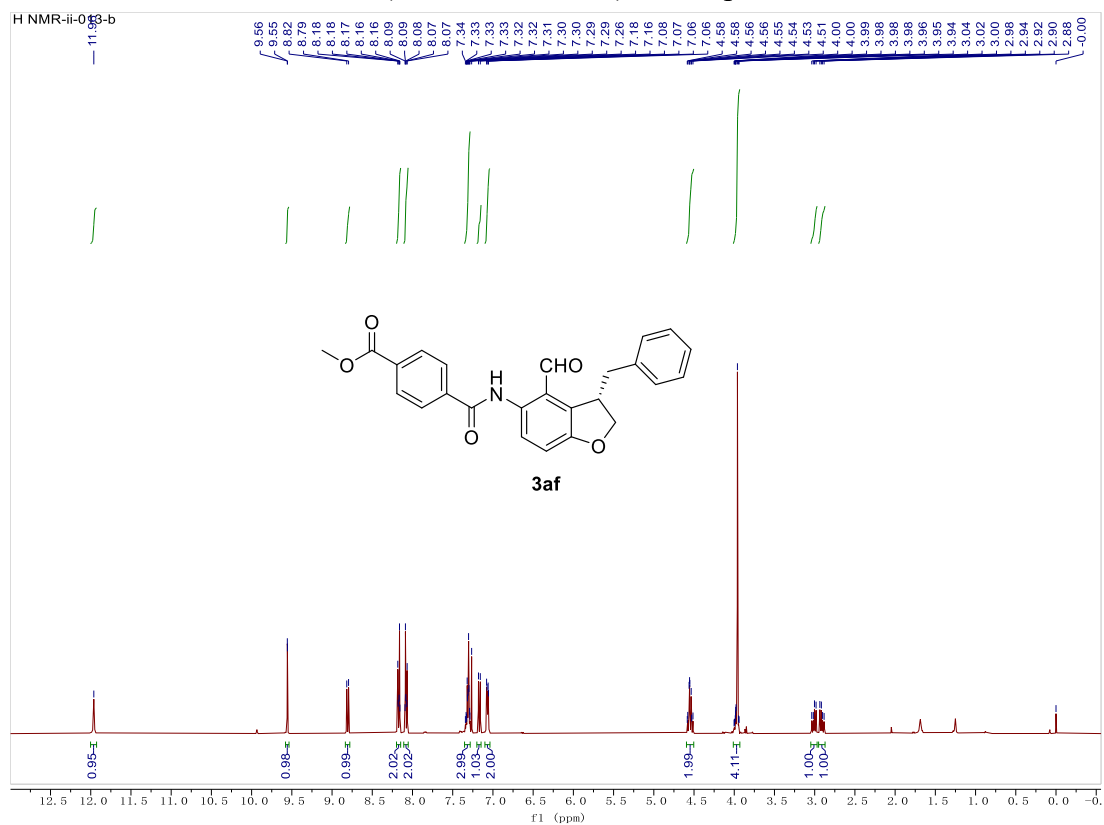

<sup>13</sup>C NMR (101 MHz, CDCl<sub>3</sub>) of compound **3af**

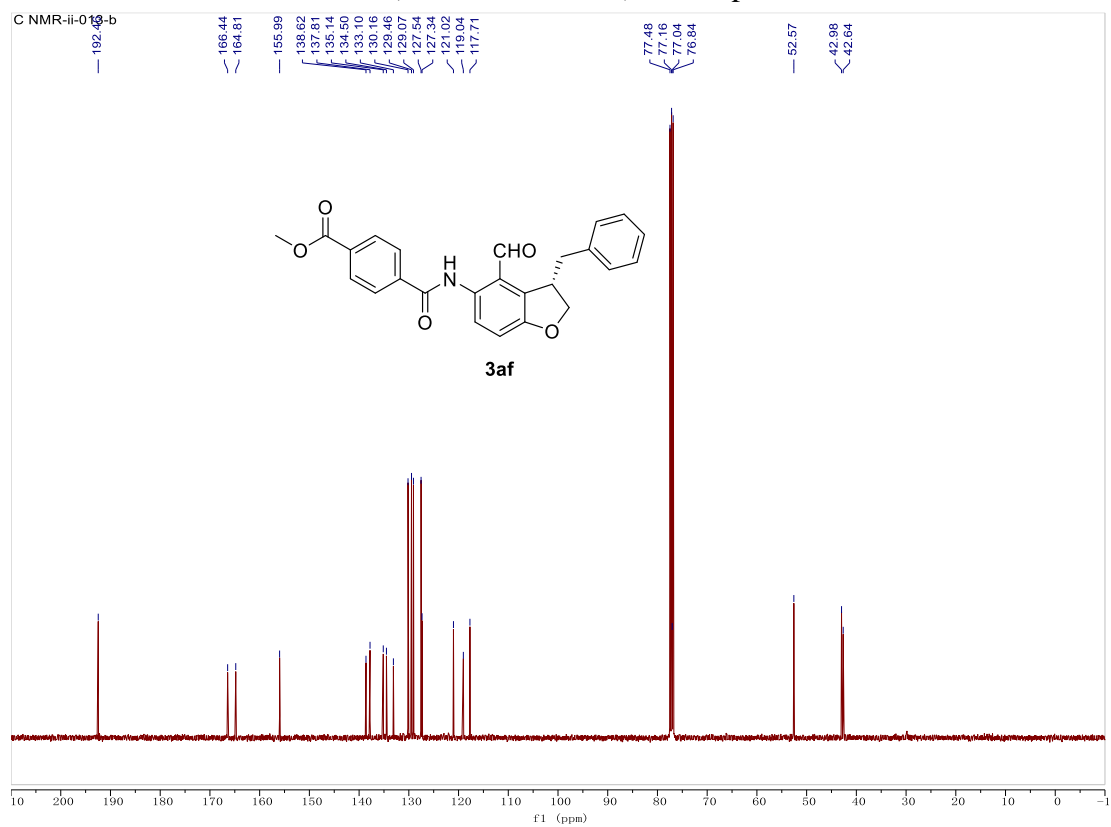

# HPLC spectra and data of compound 3af

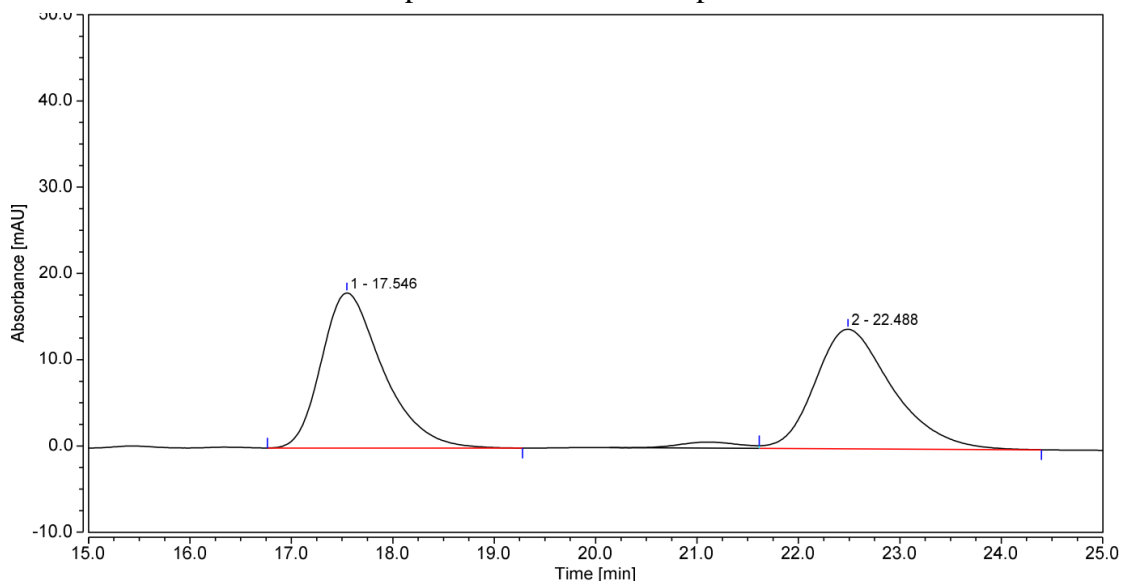

| Integration Results |           |                       |                 |               |                    |                      |                |
|---------------------|-----------|-----------------------|-----------------|---------------|--------------------|----------------------|----------------|
| No.                 | Peak Name | Retention Time<br>min | Area<br>mAU*min | Height<br>mAU | Relative Area<br>% | Relative Height<br>% | Amount<br>n.a. |
| 1                   |           | 17.546                | 12.631          | 17.970        | 50.77              | 56.44                | n.a.           |
| 2                   |           | 22.488                | 12.250          | 13.866        | 49.23              | 43.56                | n.a.           |
| Total:              |           |                       | 24.881          | 31.836        | 100.00             | 100.00               |                |

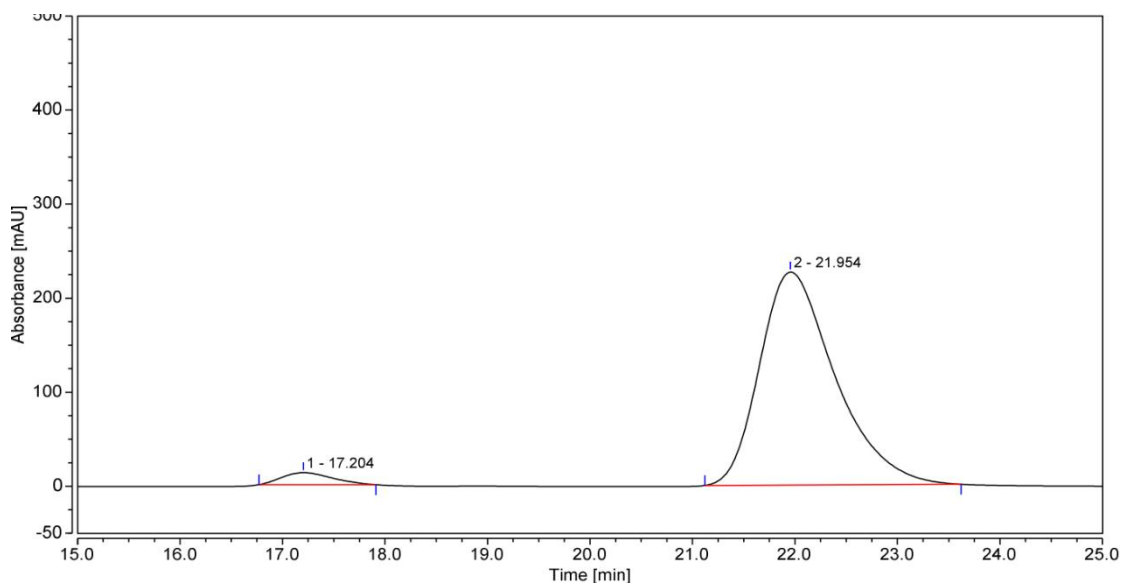

| Integration Results |           |                       |                 |               |                    |                      |                |
|---------------------|-----------|-----------------------|-----------------|---------------|--------------------|----------------------|----------------|
| No.                 | Peak Name | Retention Time<br>min | Area<br>mAU*min | Height<br>mAU | Relative Area<br>% | Relative Height<br>% | Amount<br>n.a. |
| 1                   |           | 17.204                | 7.229           | 12.740        | 3.61               | 5.33                 | n.a.           |
| 2                   |           | 21.954                | 192.889         | 226.473       | 96.39              | 94.67                | n.a.           |
| Total:              |           |                       | 200.118         | 239.213       | 100.00             | 100.00               |                |

<sup>1</sup>H NMR (400 MHz, CDCl<sub>3</sub>) of compound **3ag**

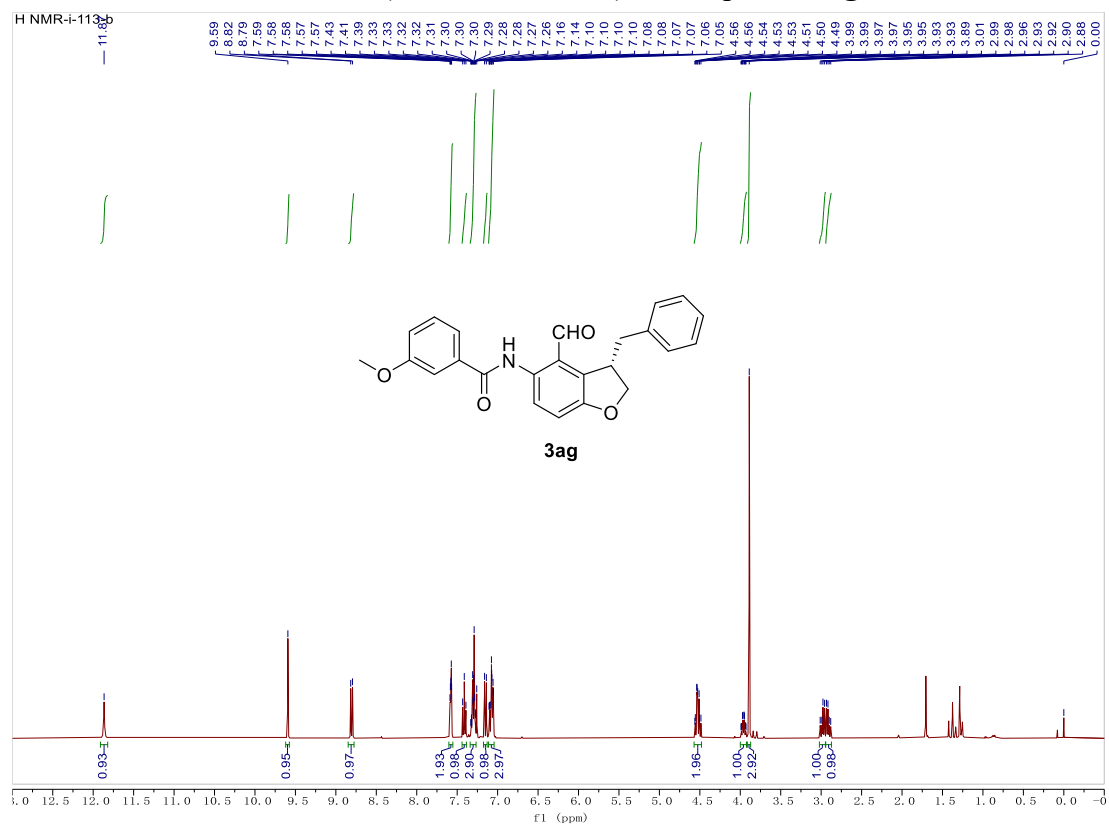

<sup>13</sup>C NMR (101 MHz, CDCl<sub>3</sub>) of compound **3ag**

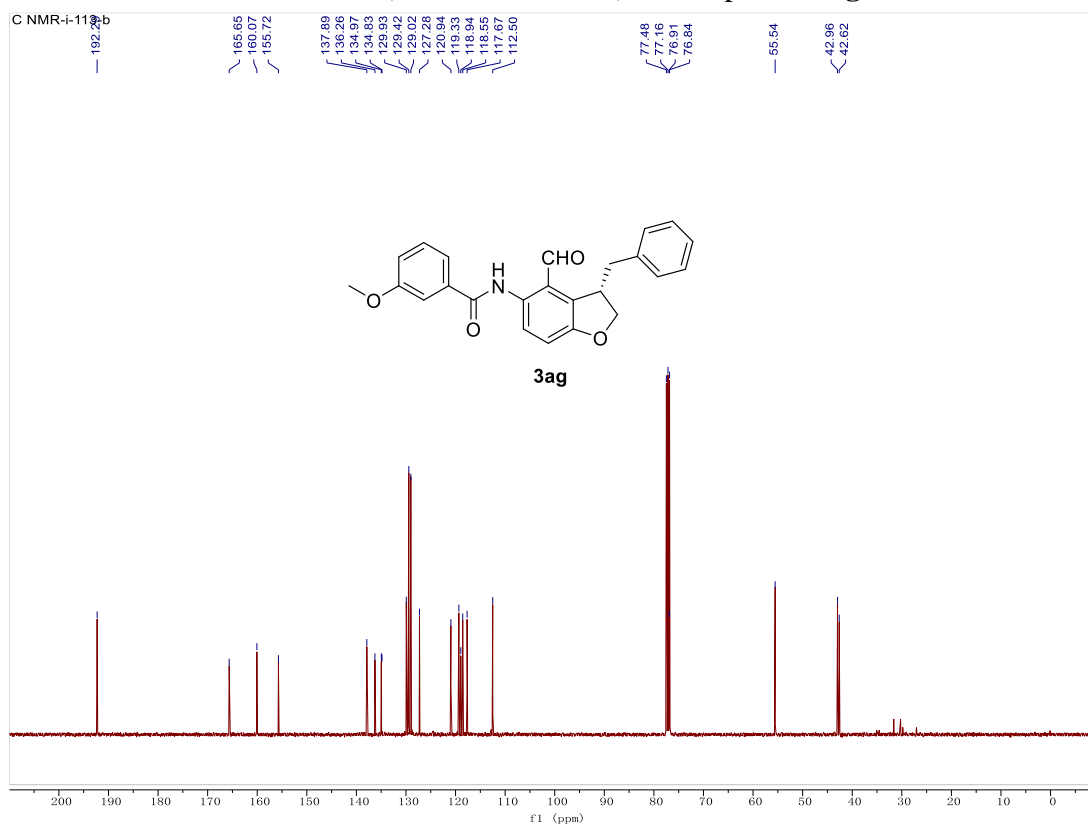

# HPLC spectra and data of compound 3ag

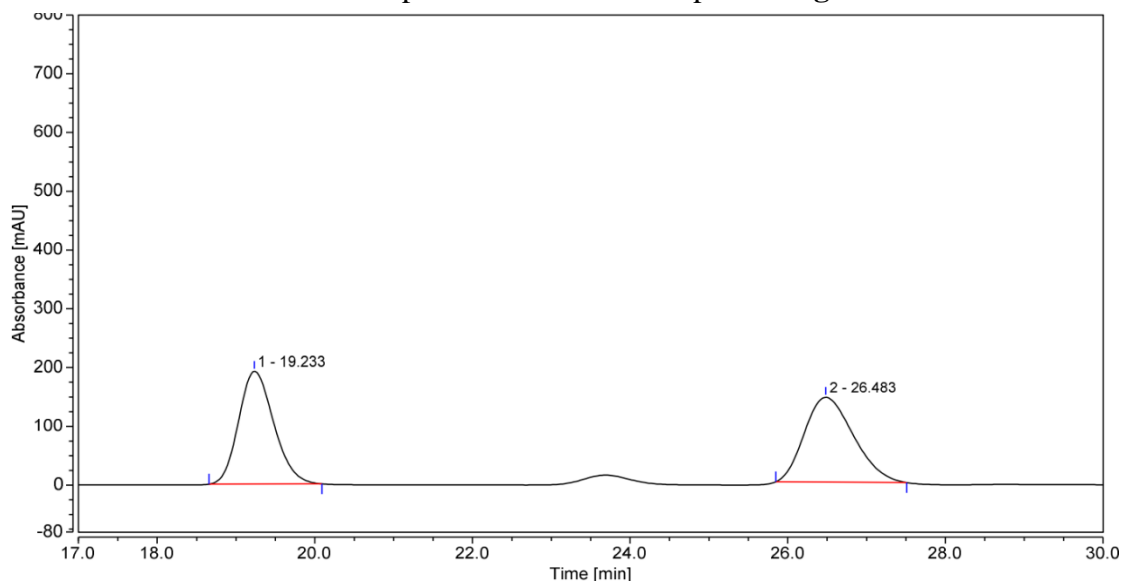

| Integration Results |           |                       |                 |               |                    |                      |                |
|---------------------|-----------|-----------------------|-----------------|---------------|--------------------|----------------------|----------------|
| No.                 | Peak Name | Retention Time<br>min | Area<br>mAU*min | Height<br>mAU | Relative Area<br>% | Relative Height<br>% | Amount<br>n.a. |
| 1                   |           | 19.233                | 99.132          | 192.029       | 48.86              | 57.11                | n.a.           |
| 2                   |           | 26.483                | 103.775         | 144.221       | 51.14              | 42.89                | n.a.           |
| Total:              |           |                       | 202.906         | 336.250       | 100.00             | 100.00               |                |

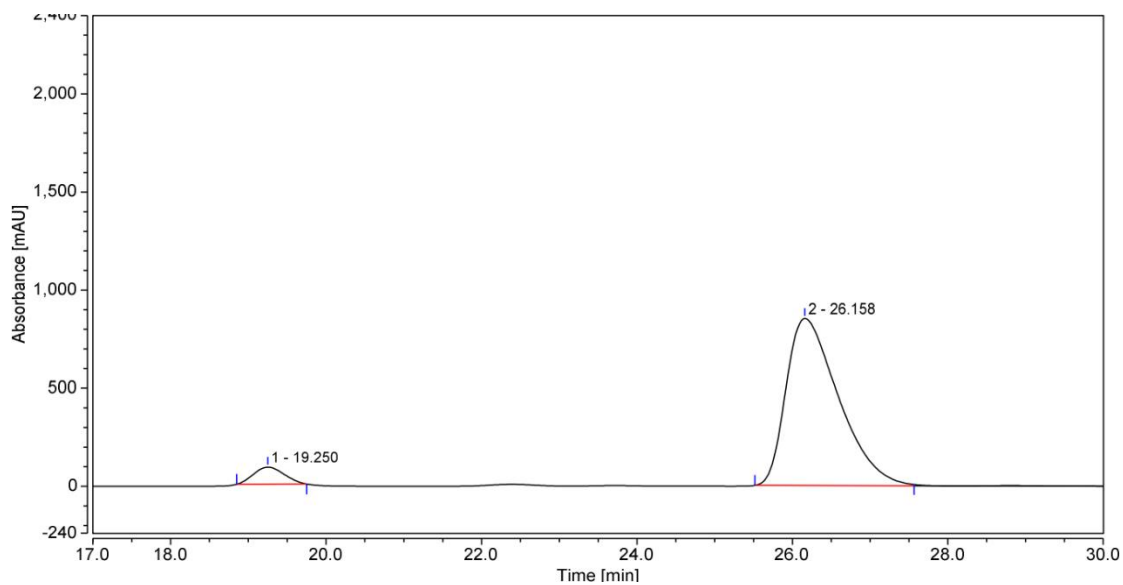

| Integration Results |           |                       |                 |               |                    |                      |                |
|---------------------|-----------|-----------------------|-----------------|---------------|--------------------|----------------------|----------------|
| No.                 | Peak Name | Retention Time<br>min | Area<br>mAU*min | Height<br>mAU | Relative Area<br>% | Relative Height<br>% | Amount<br>n.a. |
| 1                   |           | 19.250                | 39.405          | 86.408        | 5.59               | 9.21                 | n.a.           |
| 2                   |           | 26.158                | 665.562         | 852.076       | 94.41              | 90.79                | n.a.           |
| Total:              |           |                       | 704.967         | 938.484       | 100.00             | 100.00               |                |

<sup>1</sup>H NMR (400 MHz, CDCl<sub>3</sub>) of compound **3ah**

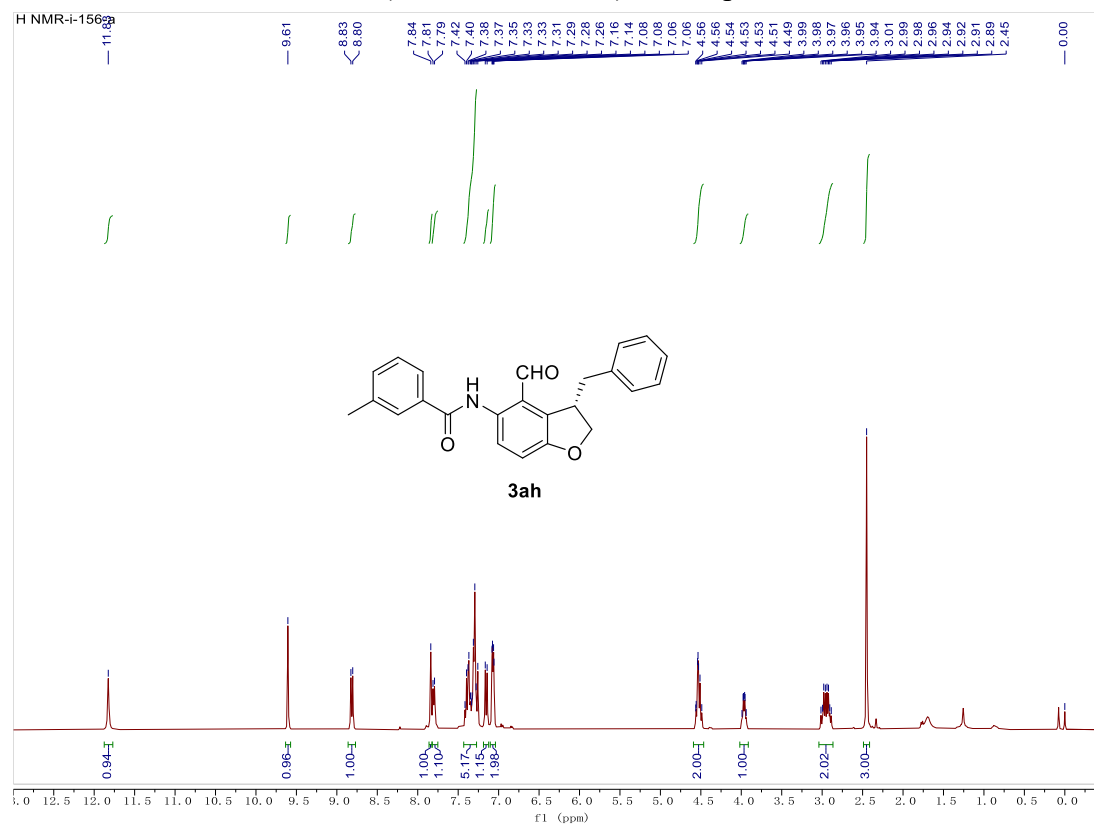

<sup>13</sup>C NMR (101 MHz, CDCl<sub>3</sub>) of compound **3ah**

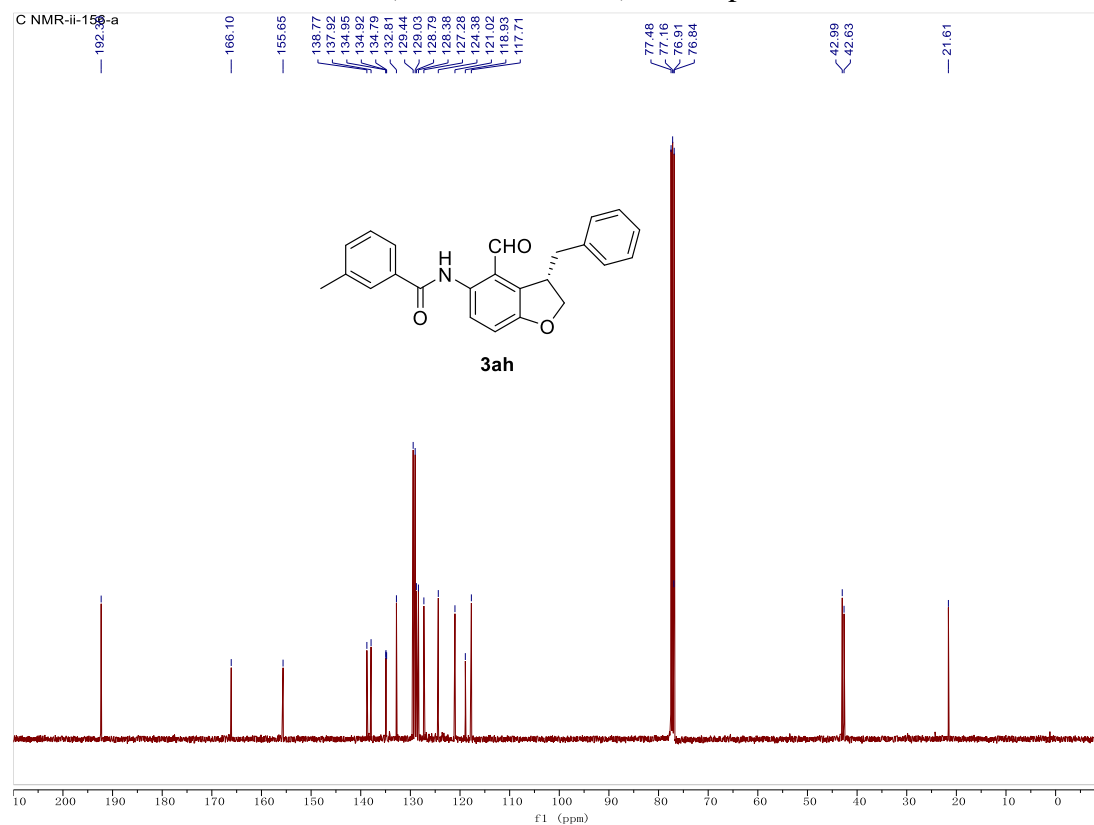

# HPLC spectra and data of compound 3ah

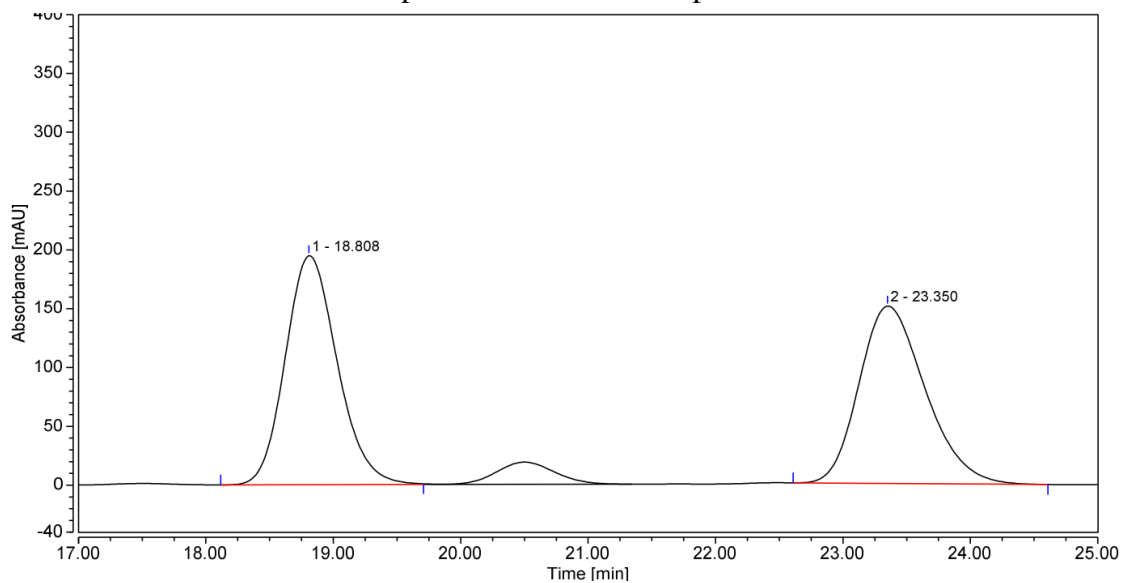

| Integration Results |           |                       |                 |               |                    |                      |                |
|---------------------|-----------|-----------------------|-----------------|---------------|--------------------|----------------------|----------------|
| No.                 | Peak Name | Retention Time<br>min | Area<br>mAU*min | Height<br>mAU | Relative Area<br>% | Relative Height<br>% | Amount<br>n.a. |
| 1                   |           | 18.808                | 92.165          | 194.780       | 50.42              | 56.36                | n.a.           |
| 2                   |           | 23.350                | 90.623          | 150.792       | 49.58              | 43.64                | n.a.           |
| Total:              |           |                       | 182.788         | 345.572       | 100.00             | 100.00               |                |

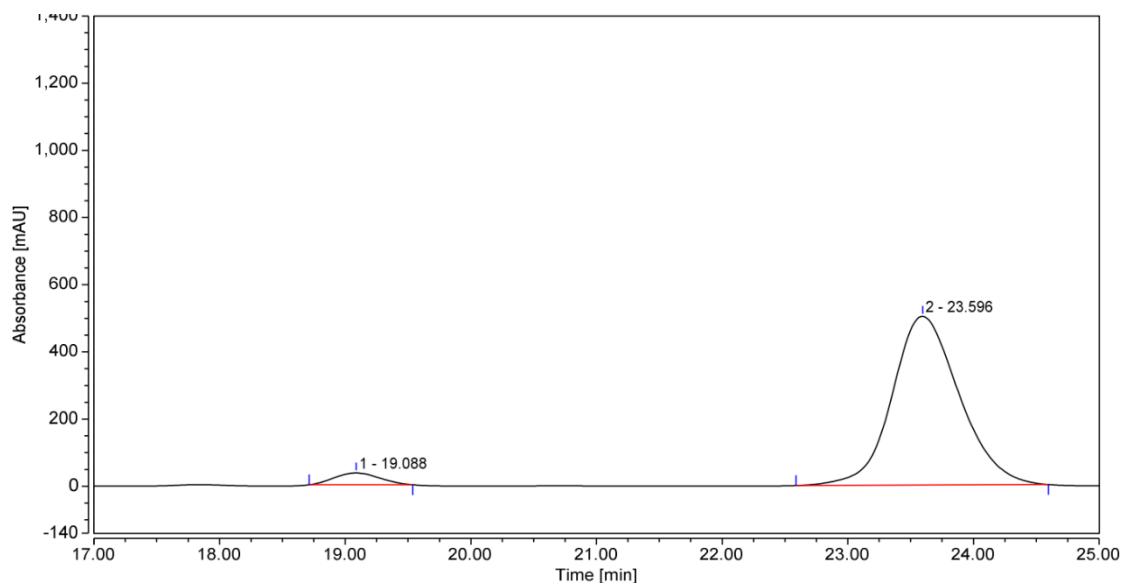

| Integration Results |           |                       |                 |               |                    |                      |                |
|---------------------|-----------|-----------------------|-----------------|---------------|--------------------|----------------------|----------------|
| No.                 | Peak Name | Retention Time<br>min | Area<br>mAU*min | Height<br>mAU | Relative Area<br>% | Relative Height<br>% | Amount<br>n.a. |
| 1                   |           | 19.088                | 14.608          | 35.177        | 4.48               | 6.54                 | n.a.           |
| 2                   |           | 23.596                | 311.522         | 502.748       | 95.52              | 93.46                | n.a.           |
| Total:              |           |                       | 326.130         | 537.925       | 100.00             | 100.00               |                |

<sup>1</sup>H NMR (400 MHz, CDCl<sub>3</sub>) of compound **3ai**

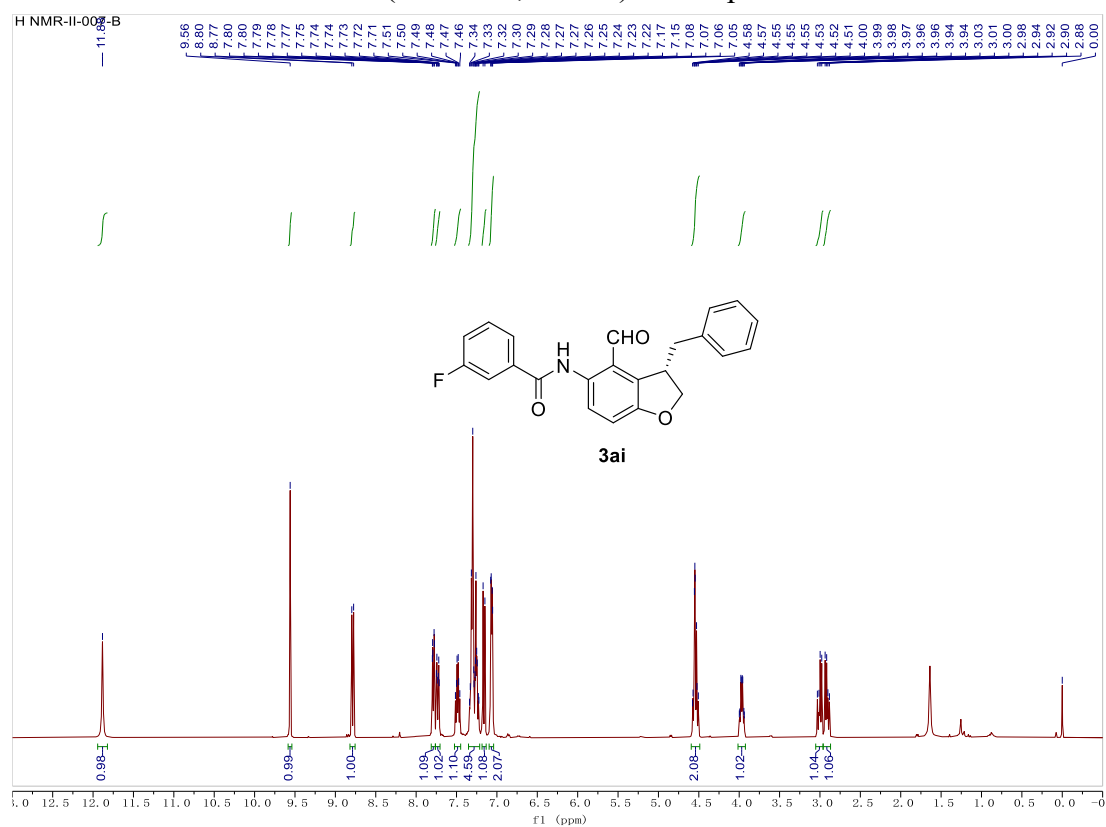

<sup>13</sup>C NMR (101 MHz, CDCl<sub>3</sub>) of compound **3ai**

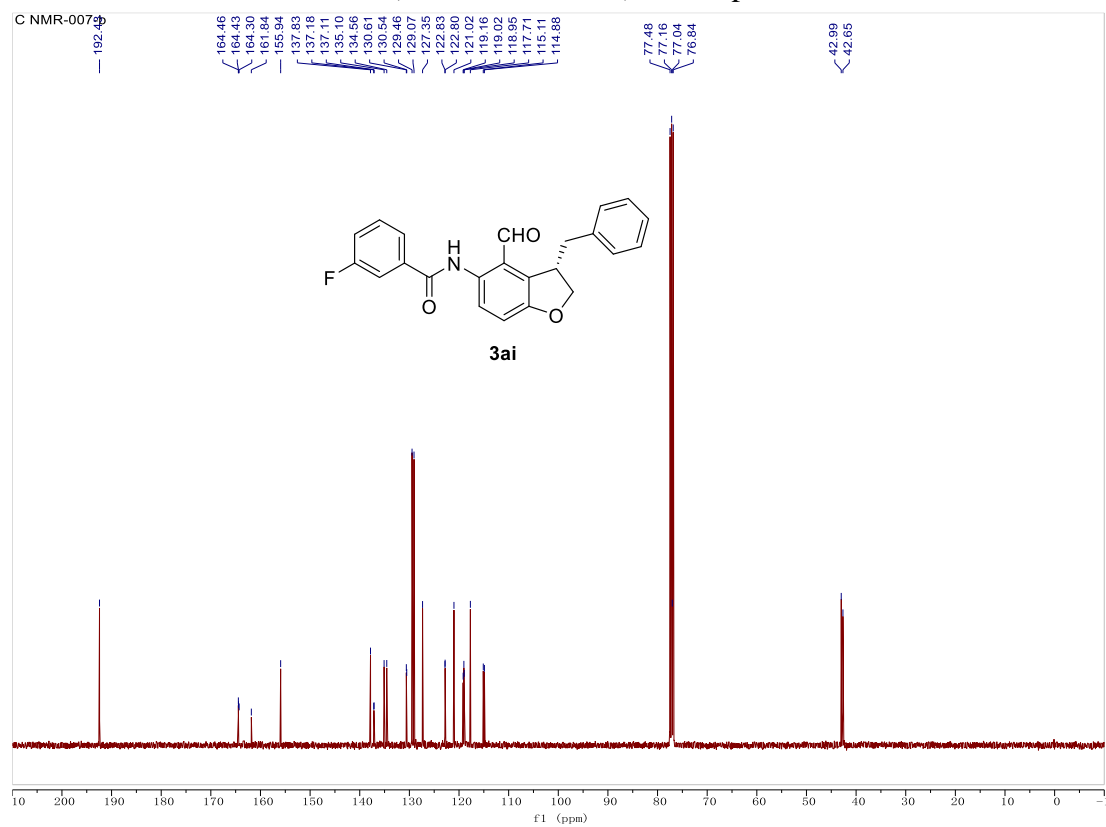

# HPLC spectra and data of compound 3ai

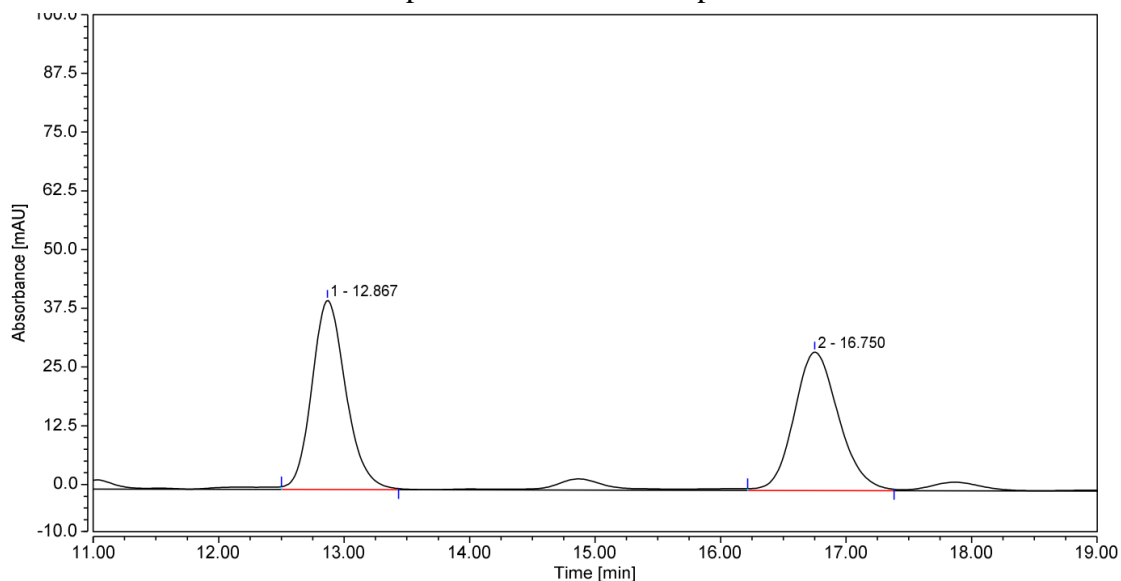

| Integration Results |           |                       |                 |               |                    |                      |                |
|---------------------|-----------|-----------------------|-----------------|---------------|--------------------|----------------------|----------------|
| No.                 | Peak Name | Retention Time<br>min | Area<br>mAU*min | Height<br>mAU | Relative Area<br>% | Relative Height<br>% | Amount<br>n.a. |
| 1                   |           | 12.867                | 12.681          | 40.276        | 51.08              | 57.74                | n.a.           |
| 2                   |           | 16.750                | 12.145          | 29.484        | 48.92              | 42.26                | n.a.           |
| Total:              |           |                       | 24.826          | 69.760        | 100.00             | 100.00               |                |

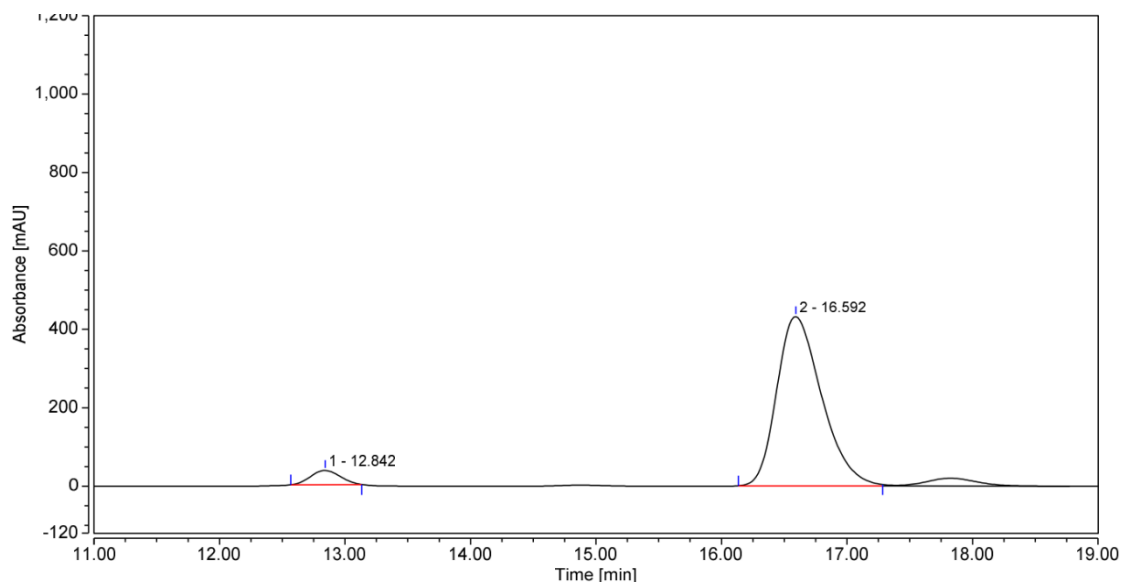

| Integration Results |           |                       |                 |               |                    |                      |                |
|---------------------|-----------|-----------------------|-----------------|---------------|--------------------|----------------------|----------------|
| No.                 | Peak Name | Retention Time<br>min | Area<br>mAU*min | Height<br>mAU | Relative Area<br>% | Relative Height<br>% | Amount<br>n.a. |
| 1                   |           | 12.842                | 9.935           | 36.422        | 5.26               | 7.78                 | n.a.           |
| 2                   |           | 16.592                | 178.865         | 431.953       | 94.74              | 92.22                | n.a.           |
| Total:              |           |                       | 188.800         | 468.375       | 100.00             | 100.00               |                |

<sup>1</sup>H NMR (400 MHz, CDCl<sub>3</sub>) of compound **3aj**

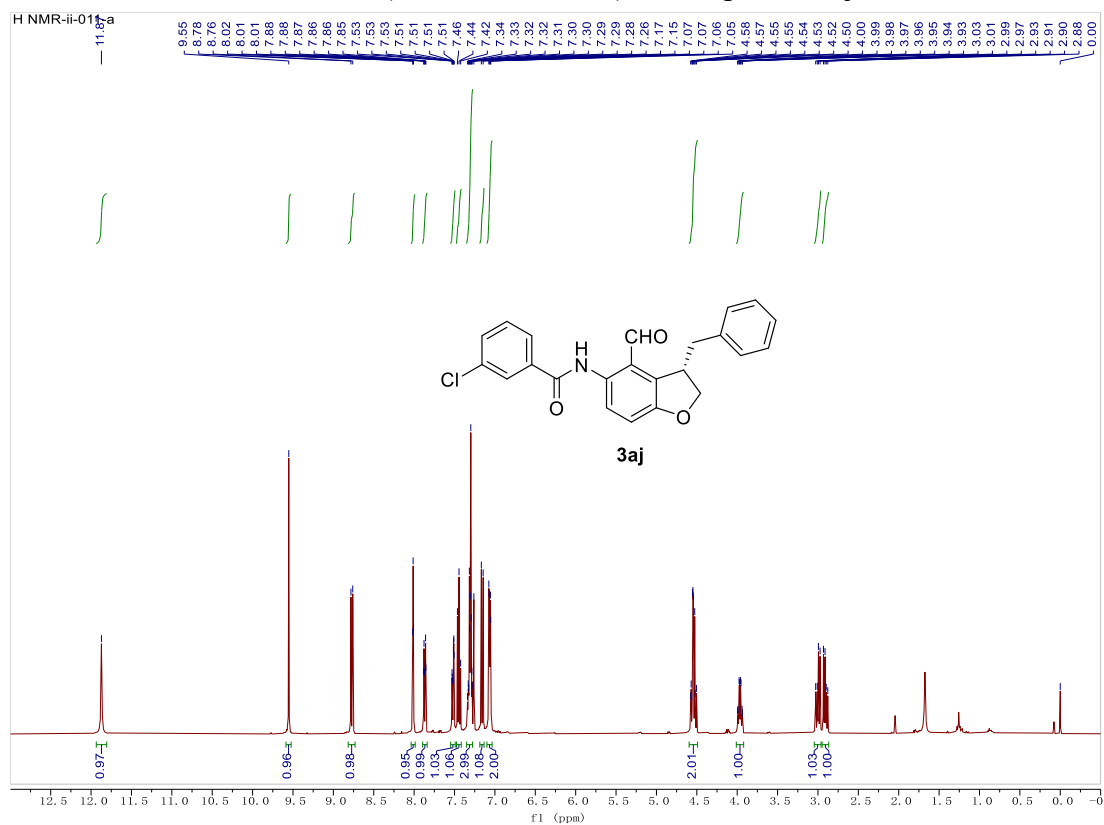

<sup>13</sup>C NMR (101 MHz, CDCl<sub>3</sub>) of compound **3aj**

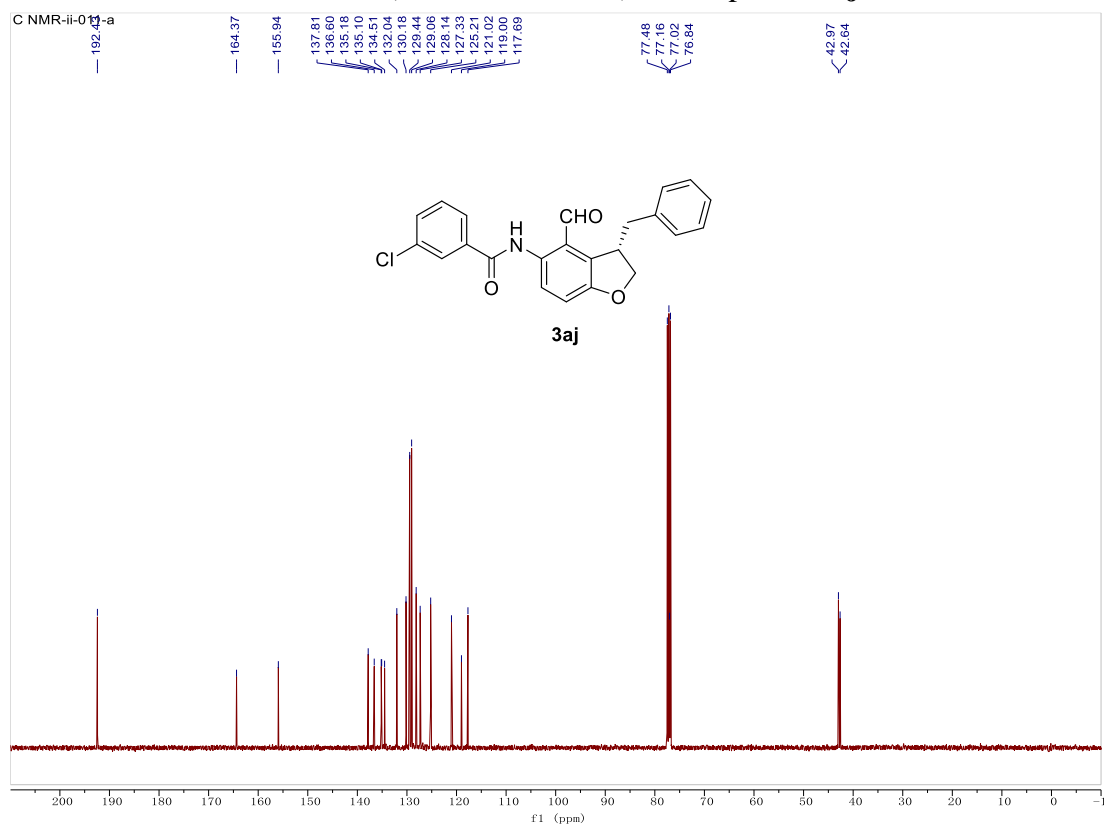

# HPLC spectra and data of compound 3aj

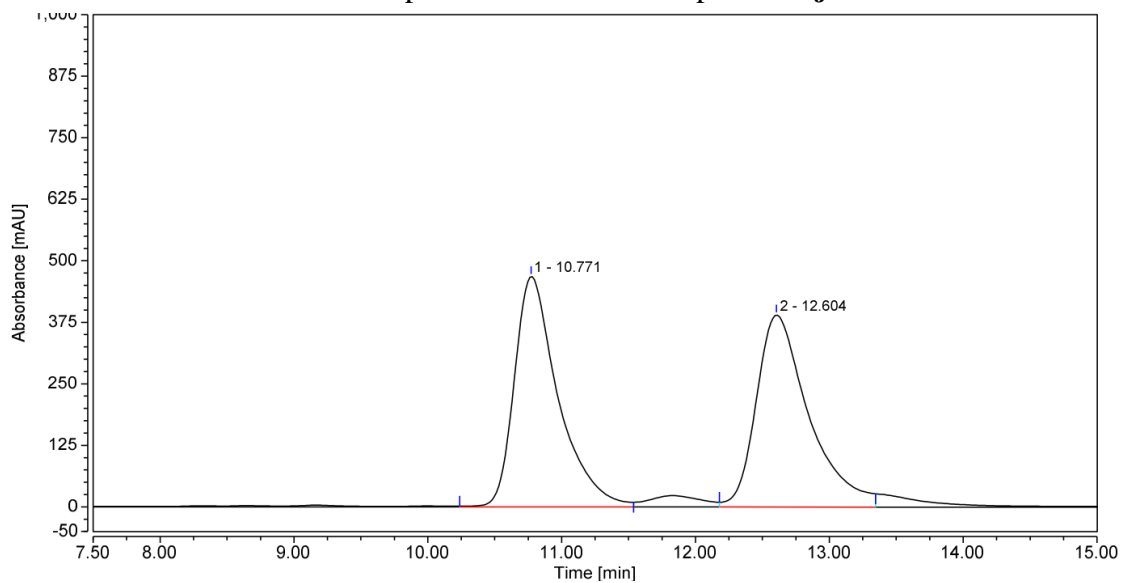

| Integration Results |           |                       |                 |               |                    |                      |                |
|---------------------|-----------|-----------------------|-----------------|---------------|--------------------|----------------------|----------------|
| No.                 | Peak Name | Retention Time<br>min | Area<br>mAU*min | Height<br>mAU | Relative Area<br>% | Relative Height<br>% | Amount<br>n.a. |
| 1                   |           | 10.771                | 177.317         | 468.253       | 50.00              | 54.55                | n.a.           |
| 2                   |           | 12.604                | 177.300         | 390.089       | 50.00              | 45.45                | n.a.           |
| Total:              |           |                       | 354.618         | 858.342       | 100.00             | 100.00               |                |

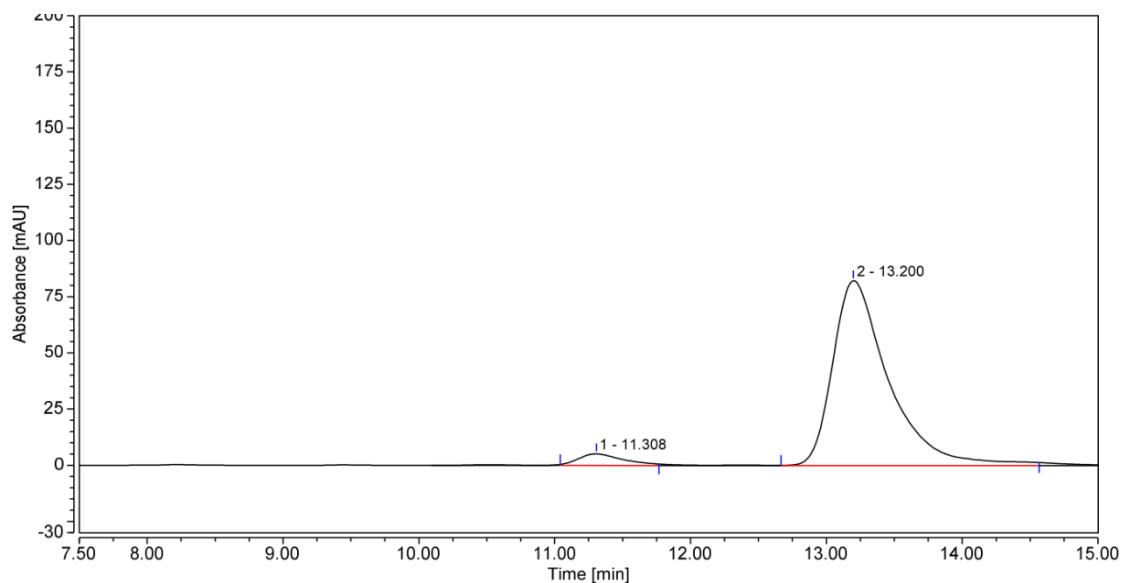

| Integration Results |           |                       |                 |               |                    |                      |                |
|---------------------|-----------|-----------------------|-----------------|---------------|--------------------|----------------------|----------------|
| No.                 | Peak Name | Retention Time<br>min | Area<br>mAU*min | Height<br>mAU | Relative Area<br>% | Relative Height<br>% | Amount<br>n.a. |
| 1                   |           | 11.308                | 1.956           | 5.165         | 4.75               | 5.91                 | n.a.           |
| 2                   |           | 13.200                | 39.180          | 82.243        | 95.25              | 94.09                | n.a.           |
| Total:              |           |                       | 41.136          | 87.409        | 100.00             | 100.00               |                |

<sup>1</sup>H NMR (400 MHz, CDCl<sub>3</sub>) of compound **3ak**

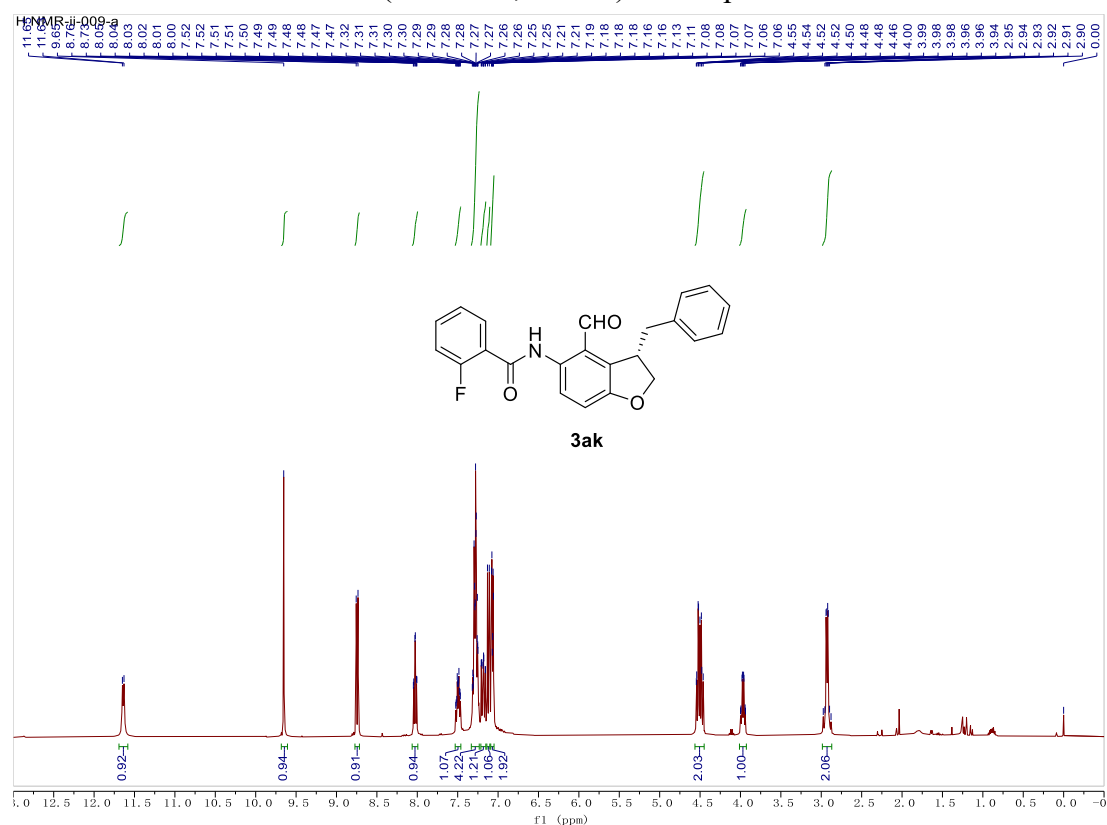

<sup>13</sup>C NMR (101 MHz, CDCl<sub>3</sub>) of compound **3ak**

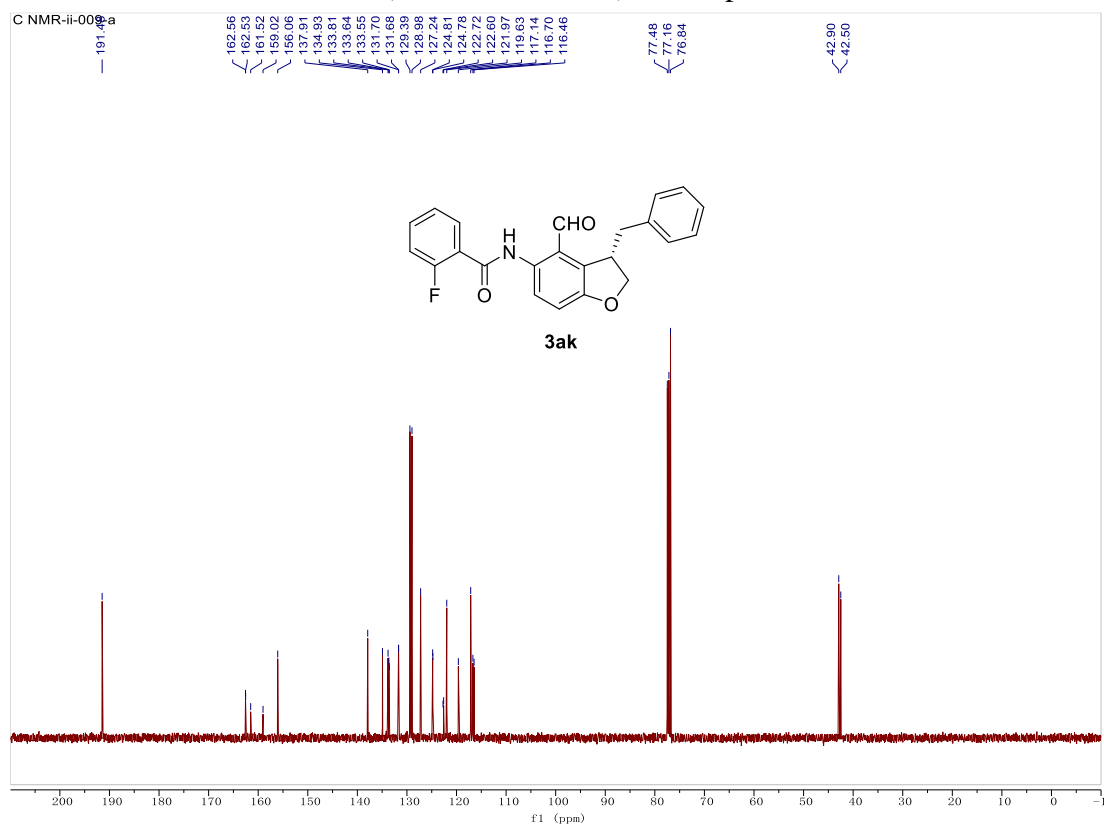

# HPLC spectra and data of compound 3ak

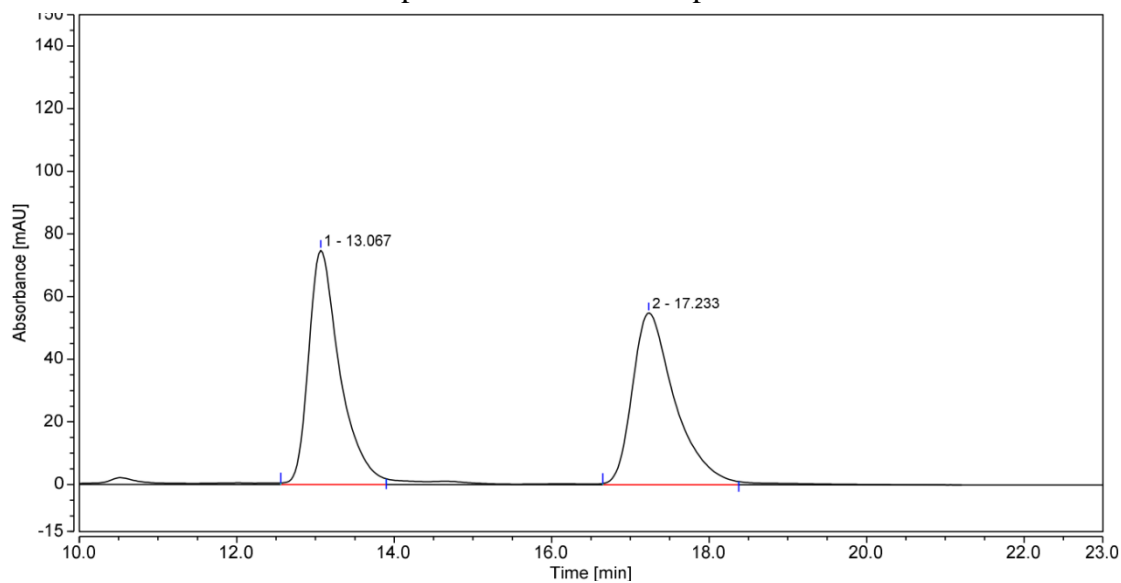

| Integration Results |           |                       |                 |               |                    |                      |                |
|---------------------|-----------|-----------------------|-----------------|---------------|--------------------|----------------------|----------------|
| No.                 | Peak Name | Retention Time<br>min | Area<br>mAU*min | Height<br>mAU | Relative Area<br>% | Relative Height<br>% | Amount<br>n.a. |
| 1                   |           | 13.067                | 34.260          | 74.776        | 50.04              | 57.67                | n.a.           |
| 2                   |           | 17.233                | 34.201          | 54.878        | 49.96              | 42.33                | n.a.           |
| Total:              |           |                       | 68.461          | 129.653       | 100.00             | 100.00               |                |

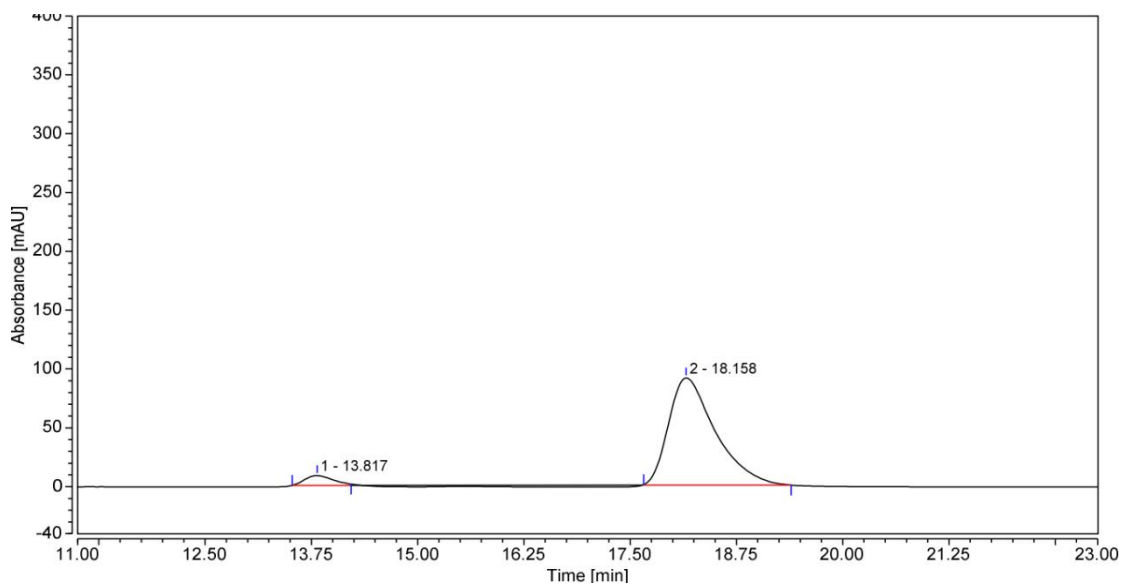

| Integration Results |           |                       |                 |               |                    |                      |                |
|---------------------|-----------|-----------------------|-----------------|---------------|--------------------|----------------------|----------------|
| No.                 | Peak Name | Retention Time<br>min | Area<br>mAU*min | Height<br>mAU | Relative Area<br>% | Relative Height<br>% | Amount<br>n.a. |
| 1                   |           | 13.817                | 3.196           | 8.290         | 5.22               | 8.34                 | n.a.           |
| 2                   |           | 18.158                | 58.016          | 91.162        | 94.78              | 91.66                | n.a.           |
| Total:              |           |                       | 61.213          | 99.452        | 100.00             | 100.00               |                |

<sup>1</sup>H NMR (400 MHz, CDCl<sub>3</sub>) of compound **3al**

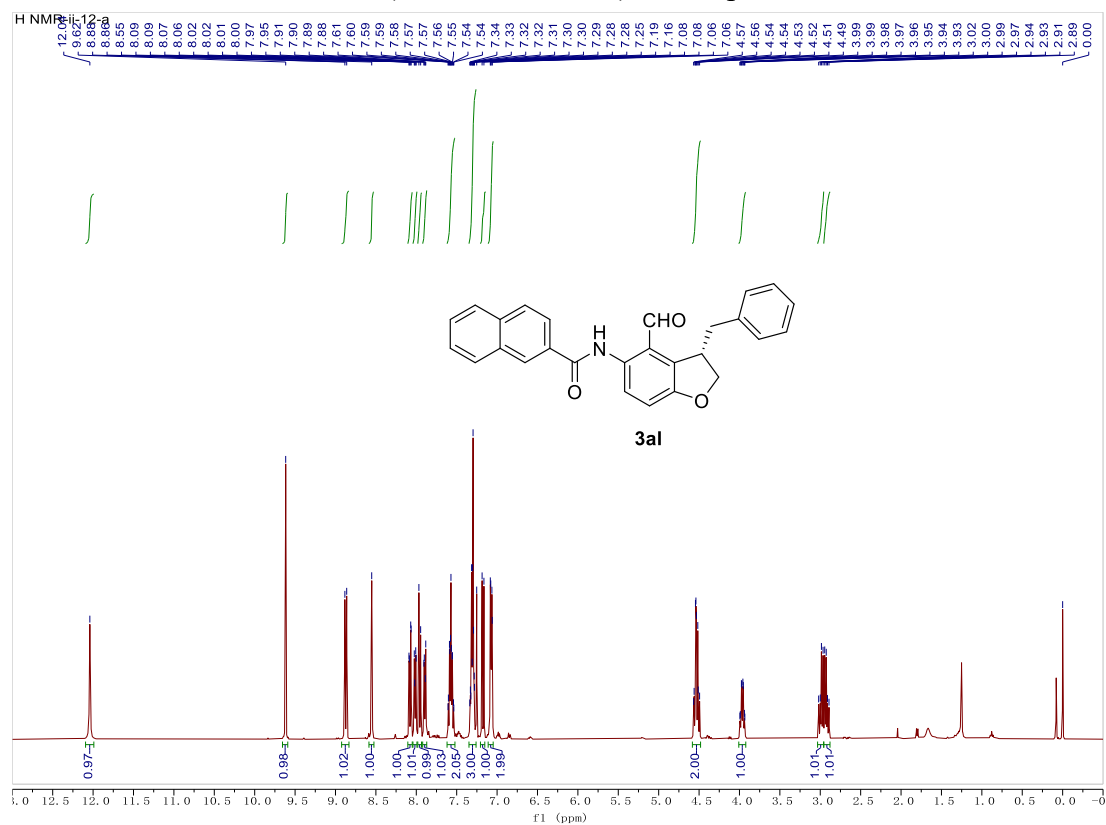

<sup>13</sup>C NMR (101 MHz, CDCl<sub>3</sub>) of compound **3al**

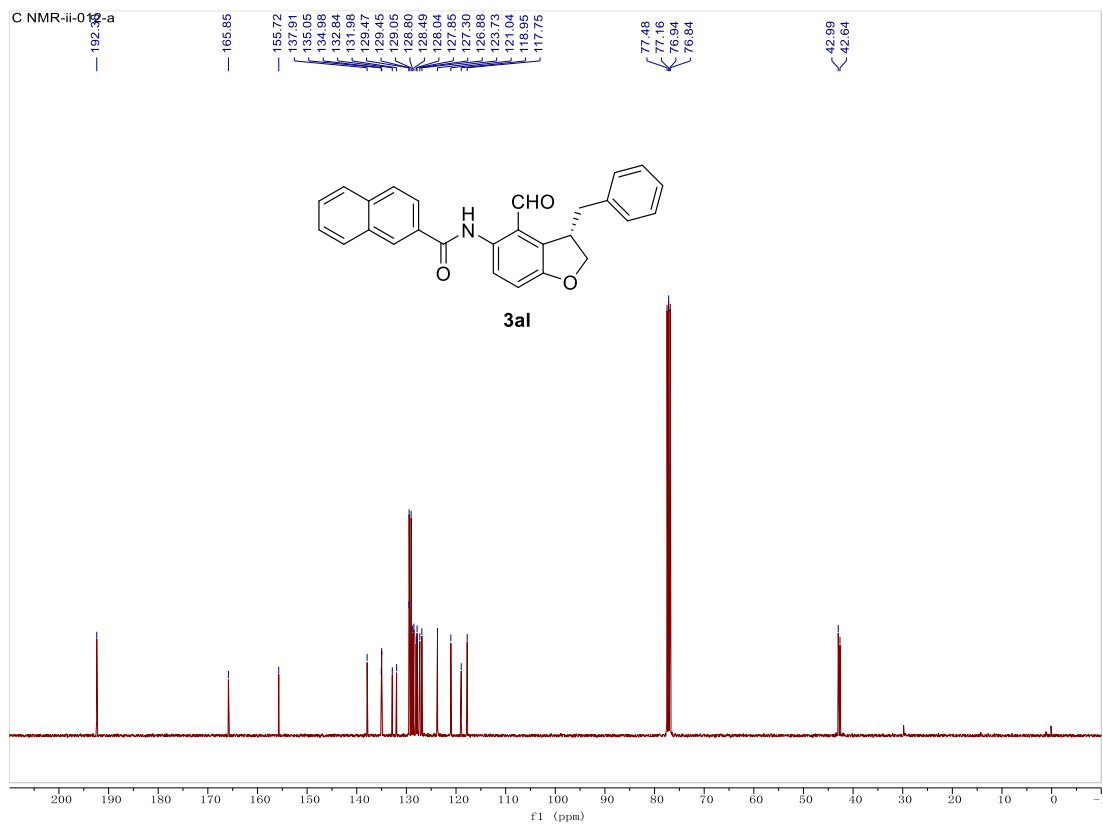

# HPLC spectra and data of compound 3aI

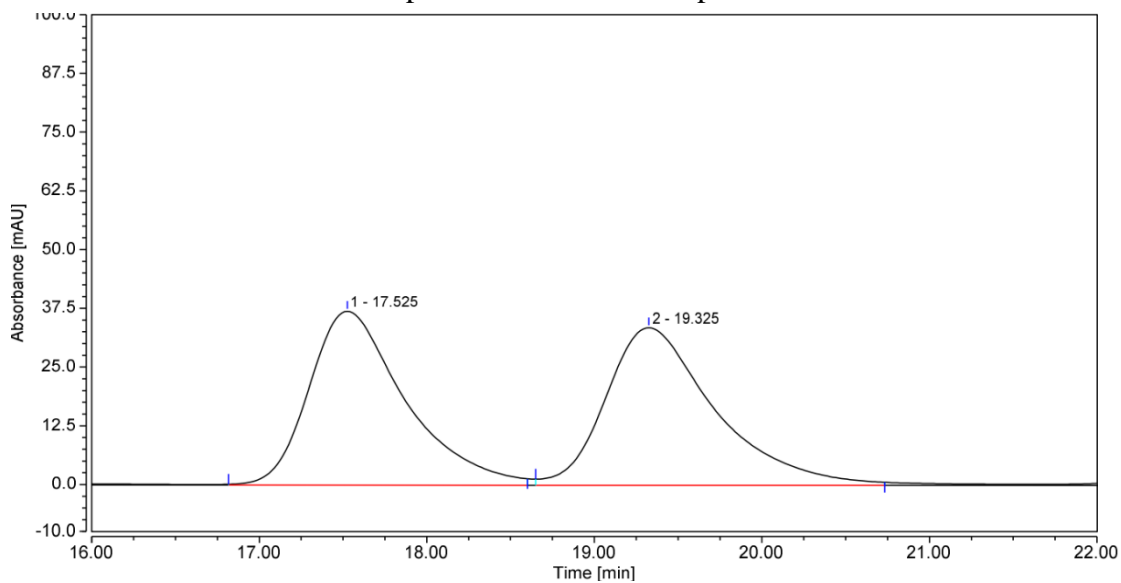

| Integration Results |           |                       |                 |               |                    |                      |                |
|---------------------|-----------|-----------------------|-----------------|---------------|--------------------|----------------------|----------------|
| No.                 | Peak Name | Retention Time<br>min | Area<br>mAU*min | Height<br>mAU | Relative Area<br>% | Relative Height<br>% | Amount<br>n.a. |
| 1                   |           | 17.525                | 24.551          | 37.017        | 49.31              | 52.47                | n.a.           |
| 2                   |           | 19.325                | 25.243          | 33.534        | 50.69              | 47.53                | n.a.           |
| Total:              |           |                       | 49.794          | 70.551        | 100.00             | 100.00               |                |

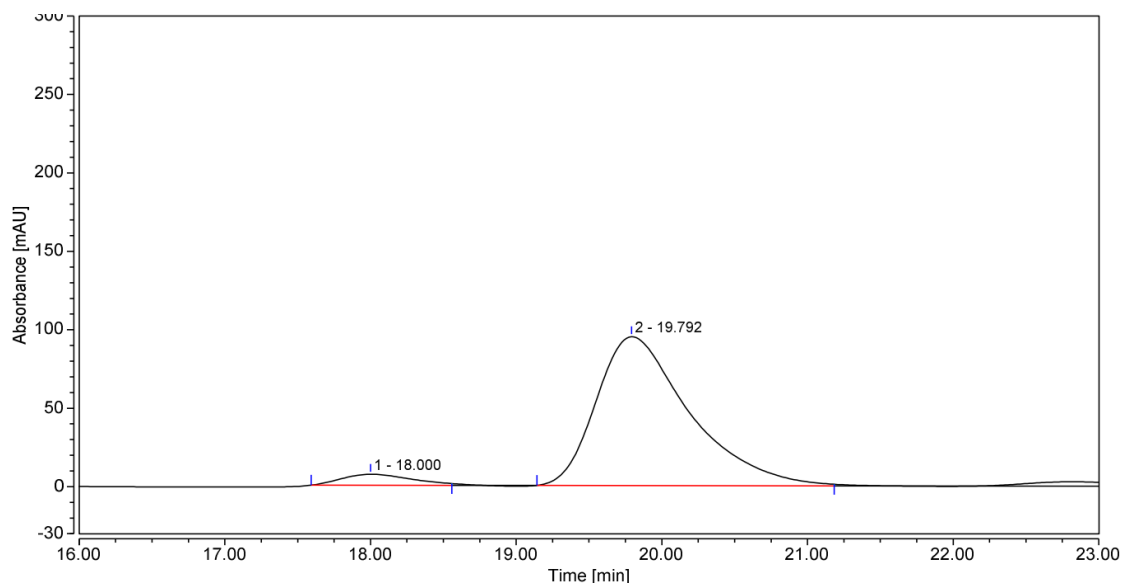

| Integration Results |           |                       |                 |               |                    |                      |                |
|---------------------|-----------|-----------------------|-----------------|---------------|--------------------|----------------------|----------------|
| No.                 | Peak Name | Retention Time<br>min | Area<br>mAU*min | Height<br>mAU | Relative Area<br>% | Relative Height<br>% | Amount<br>n.a. |
| 1                   |           | 18.000                | 3.874           | 7.010         | 5.24               | 6.88                 | n.a.           |
| 2                   |           | 19.792                | 70.103          | 94.877        | 94.76              | 93.12                | n.a.           |
| Total:              |           |                       | 73.978          | 101.887       | 100.00             | 100.00               |                |

<sup>1</sup>H NMR (400 MHz, CDCl<sub>3</sub>) of compound **3am**

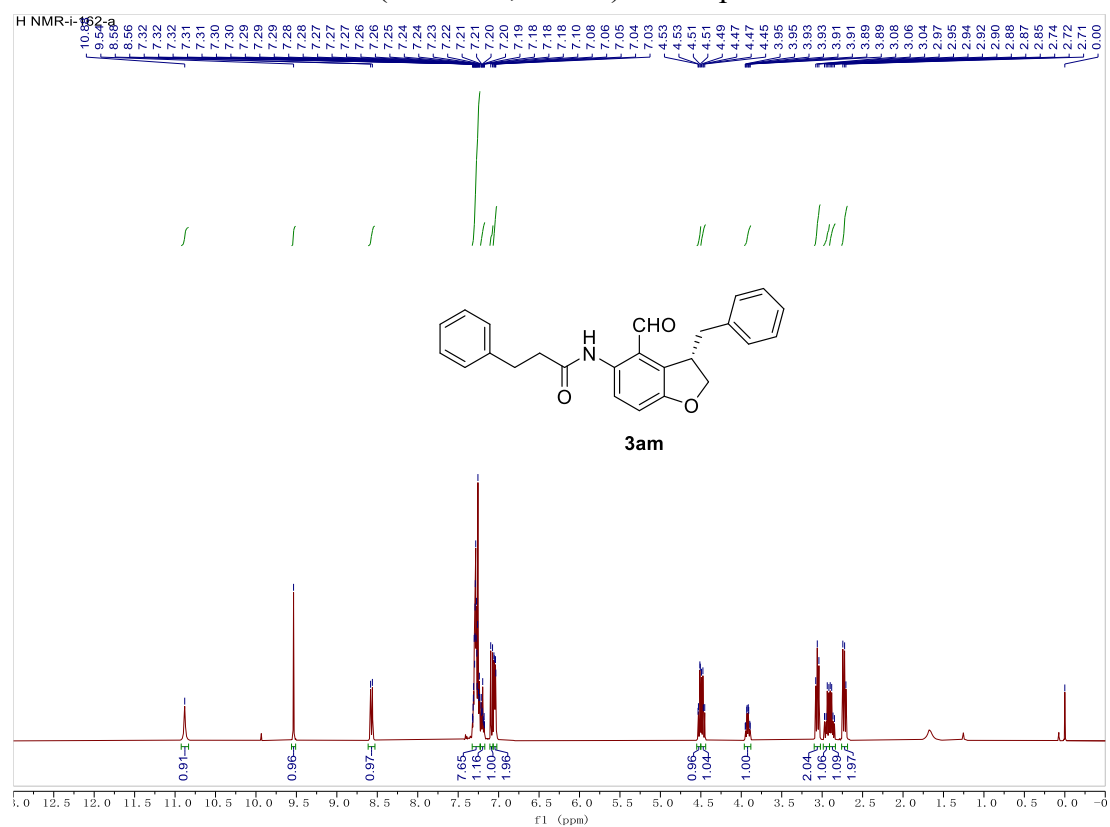

<sup>13</sup>C NMR (101 MHz, CDCl<sub>3</sub>) of compound **3am**

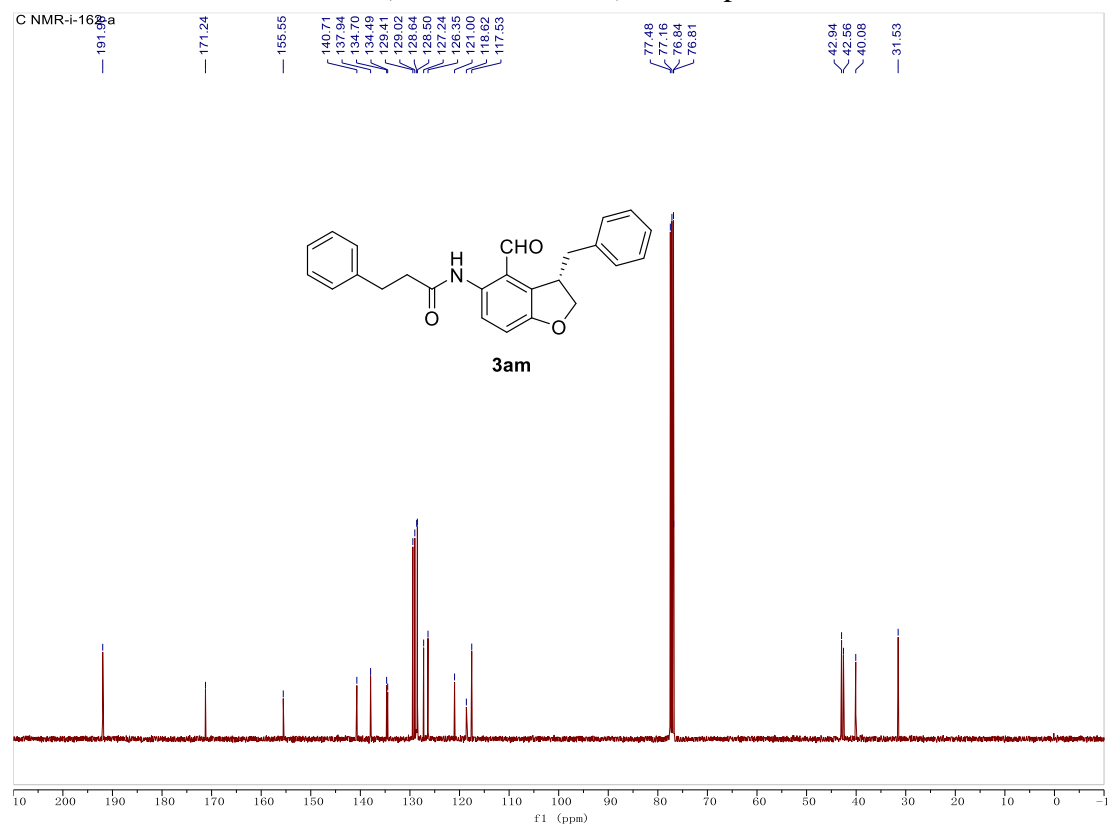

# HPLC spectra and data of compound 3am

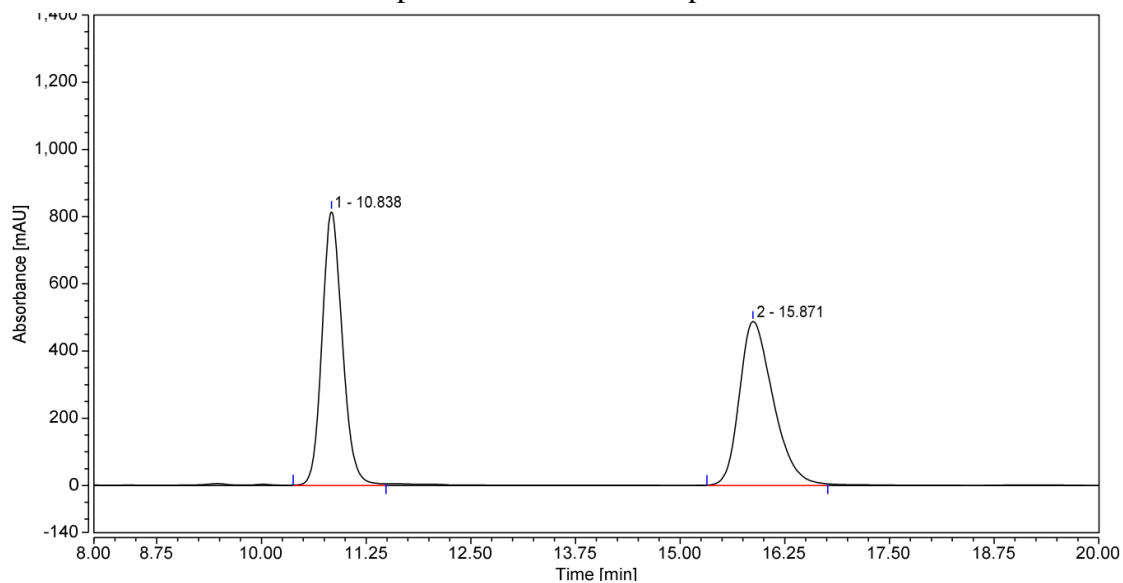

| Integration Results |           |                       |                 |               |                    |                      |                |
|---------------------|-----------|-----------------------|-----------------|---------------|--------------------|----------------------|----------------|
| No.                 | Peak Name | Retention Time<br>min | Area<br>mAU*min | Height<br>mAU | Relative Area<br>% | Relative Height<br>% | Amount<br>n.a. |
| 1                   |           | 10.838                | 229.109         | 815.419       | 50.06              | 62.54                | n.a.           |
| 2                   |           | 15.871                | 228.597         | 488.469       | 49.94              | 37.46                | n.a.           |
| Total:              |           |                       | 457.705         | 1303.889      | 100.00             | 100.00               |                |

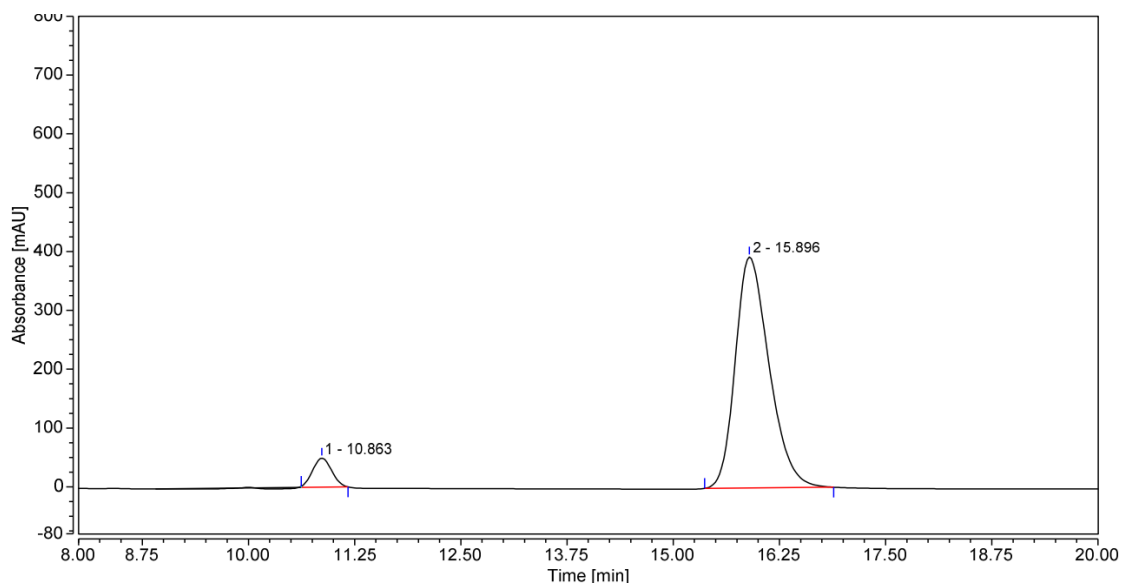

| Integration Results |           |                       |                 |               |                    |                      |                |
|---------------------|-----------|-----------------------|-----------------|---------------|--------------------|----------------------|----------------|
| No.                 | Peak Name | Retention Time<br>min | Area<br>mAU*min | Height<br>mAU | Relative Area<br>% | Relative Height<br>% | Amount<br>n.a. |
| 1                   |           | 10.863                | 12.885          | 49.541        | 6.63               | 11.20                | n.a.           |
| 2                   |           | 15.896                | 181.570         | 392.846       | 93.37              | 88.80                | n.a.           |
| Total:              |           |                       | 194.455         | 442.386       | 100.00             | 100.00               |                |

<sup>1</sup>H NMR (400 MHz, CDCl<sub>3</sub>) of compound **3an**

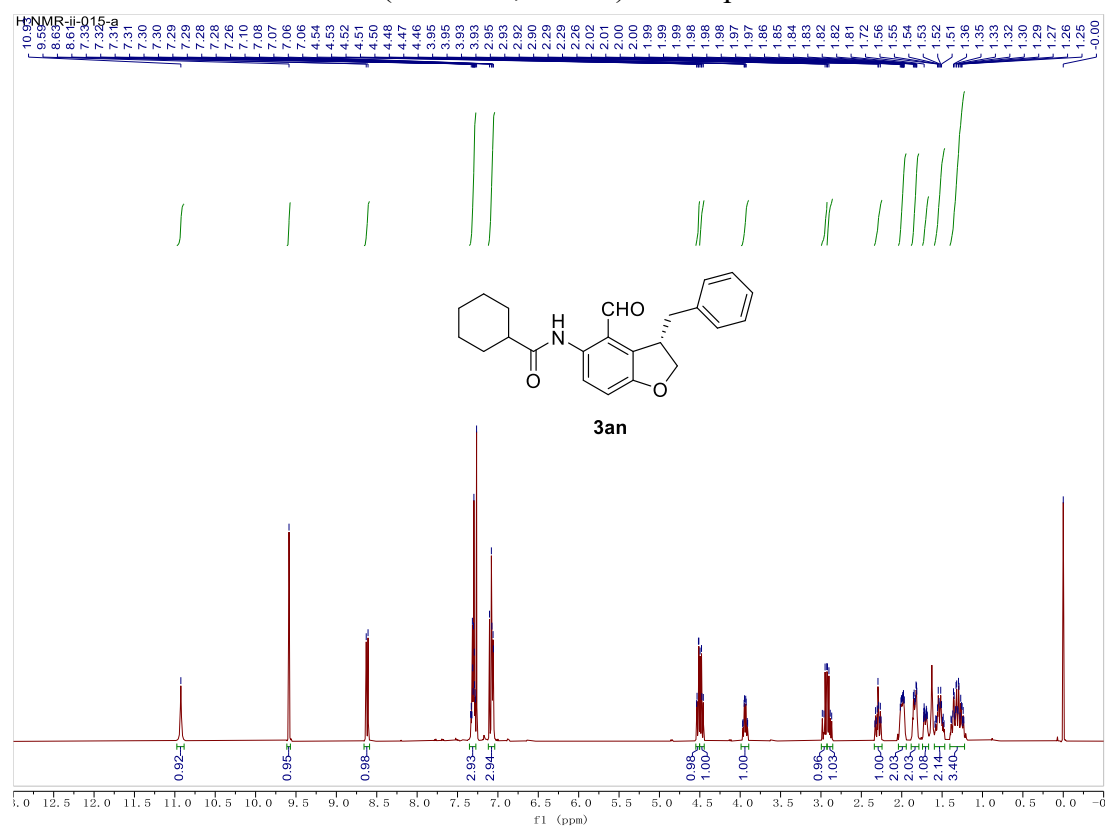

<sup>13</sup>C NMR (101 MHz, CDCl<sub>3</sub>) of compound **3an**

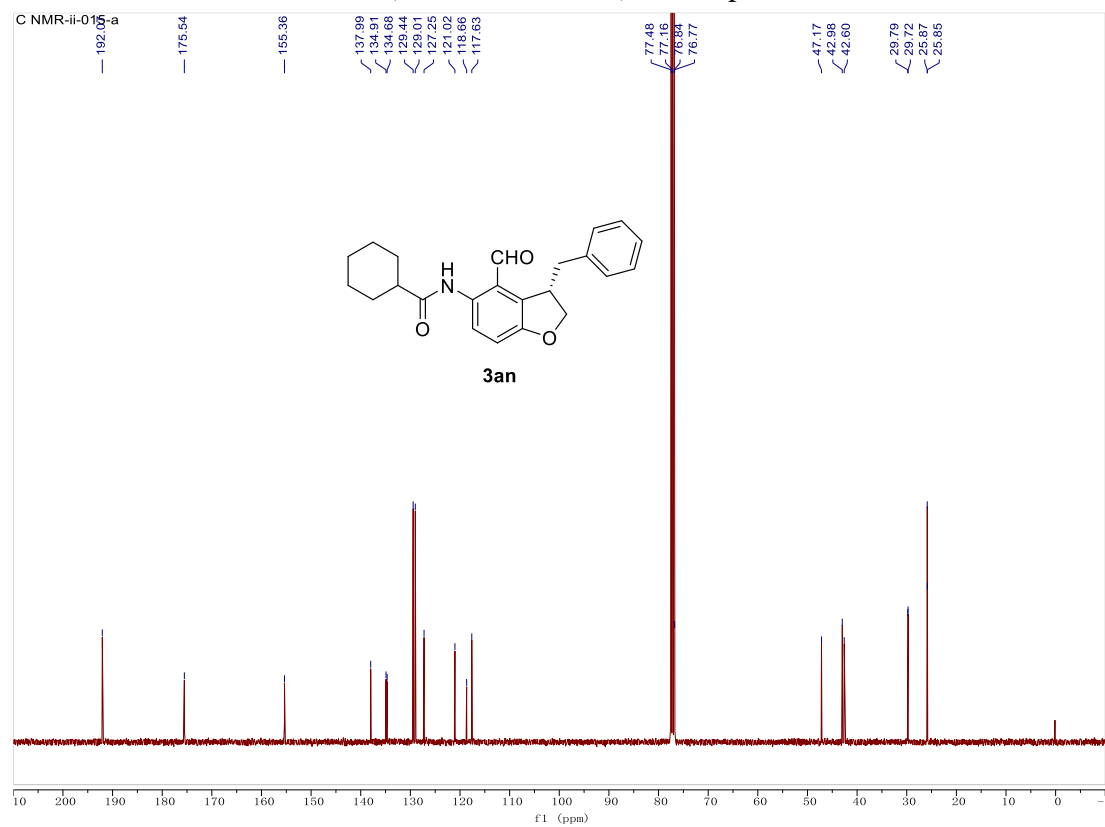

# HPLC spectra and data of compound 3an

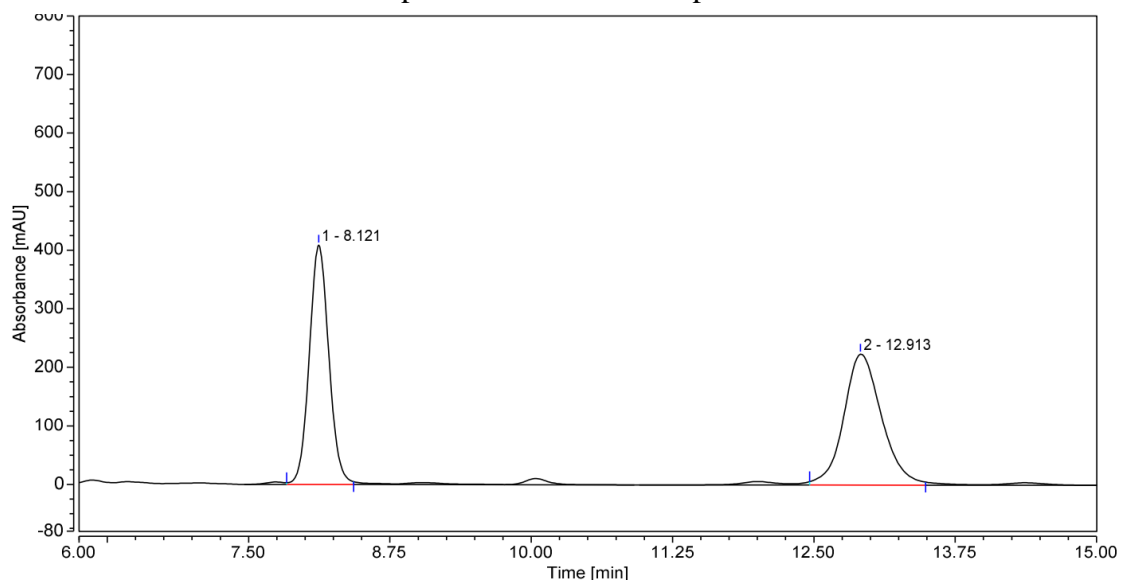

| Integration Results |           |                       |                 |               |                    |                      |                |
|---------------------|-----------|-----------------------|-----------------|---------------|--------------------|----------------------|----------------|
| No.                 | Peak Name | Retention Time<br>min | Area<br>mAU*min | Height<br>mAU | Relative Area<br>% | Relative Height<br>% | Amount<br>n.a. |
| 1                   |           | 8.121                 | 82.036          | 409.033       | 48.66              | 64.64                | n.a.           |
| 2                   |           | 12.913                | 86.558          | 223.792       | 51.34              | 35.36                | n.a.           |
| Total:              |           |                       | 168.594         | 632.825       | 100.00             | 100.00               |                |

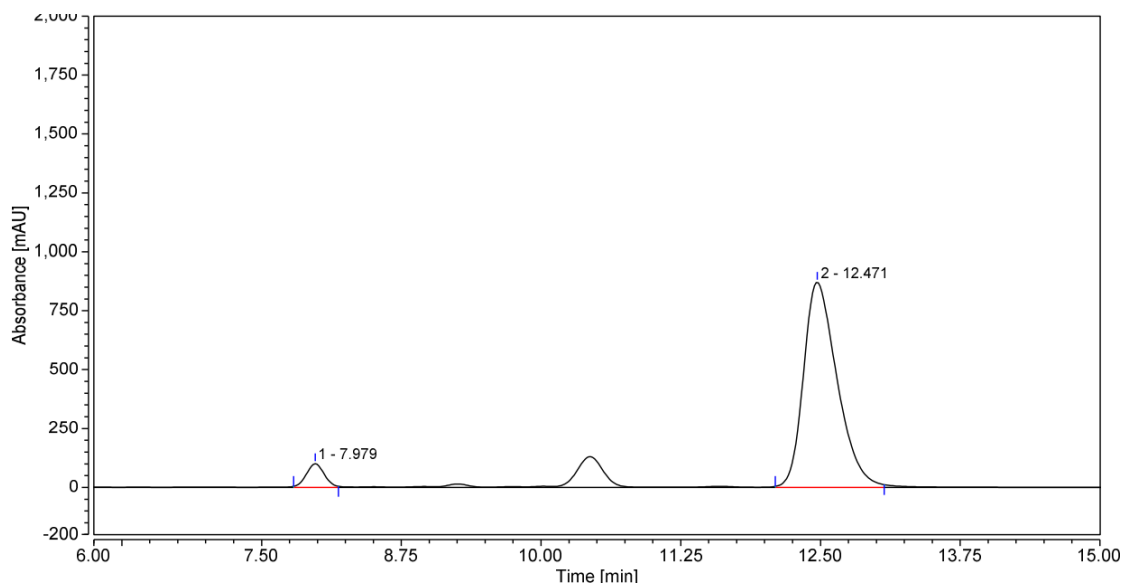

| Integration Results |           |                       |                 |               |                    |                      |                |
|---------------------|-----------|-----------------------|-----------------|---------------|--------------------|----------------------|----------------|
| No.                 | Peak Name | Retention Time<br>min | Area<br>mAU*min | Height<br>mAU | Relative Area<br>% | Relative Height<br>% | Amount<br>n.a. |
| 1                   |           | 7.979                 | 18.809          | 100.355       | 5.84               | 10.33                | n.a.           |
| 2                   |           | 12.471                | 303.221         | 870.753       | 94.16              | 89.67                | n.a.           |
| Total:              |           |                       | 322.030         | 971.108       | 100.00             | 100.00               |                |

<sup>1</sup>H NMR (400 MHz, CDCl<sub>3</sub>) of compound **3ao**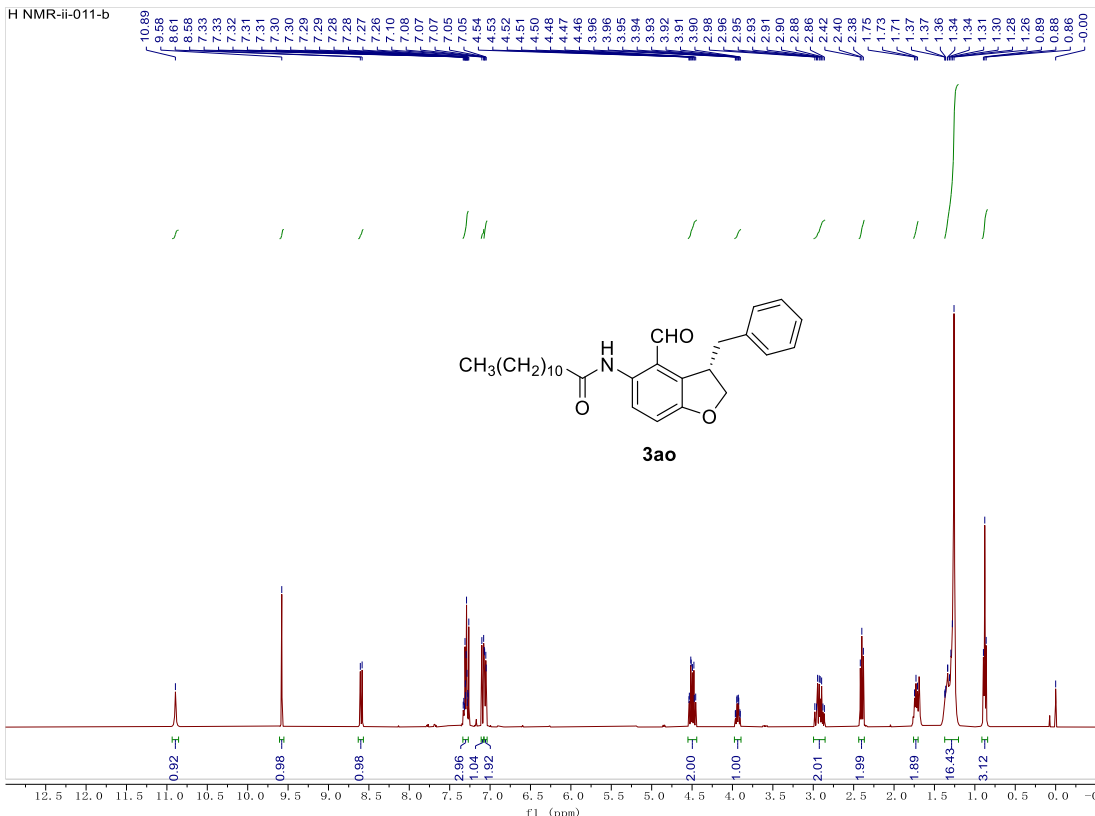 $^{13}\text{C}$  NMR (101 MHz,  $\text{CDCl}_3$ ) of compound **3ao**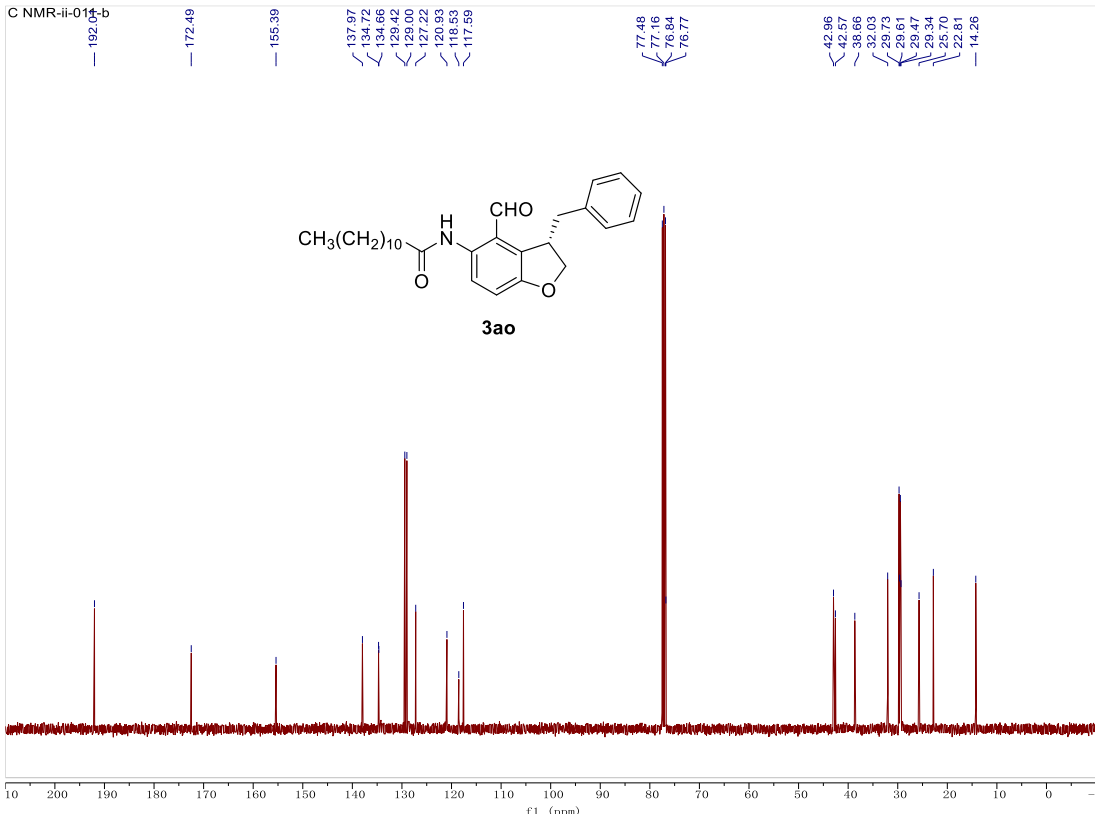

# HPLC spectra and data of compound 3ao

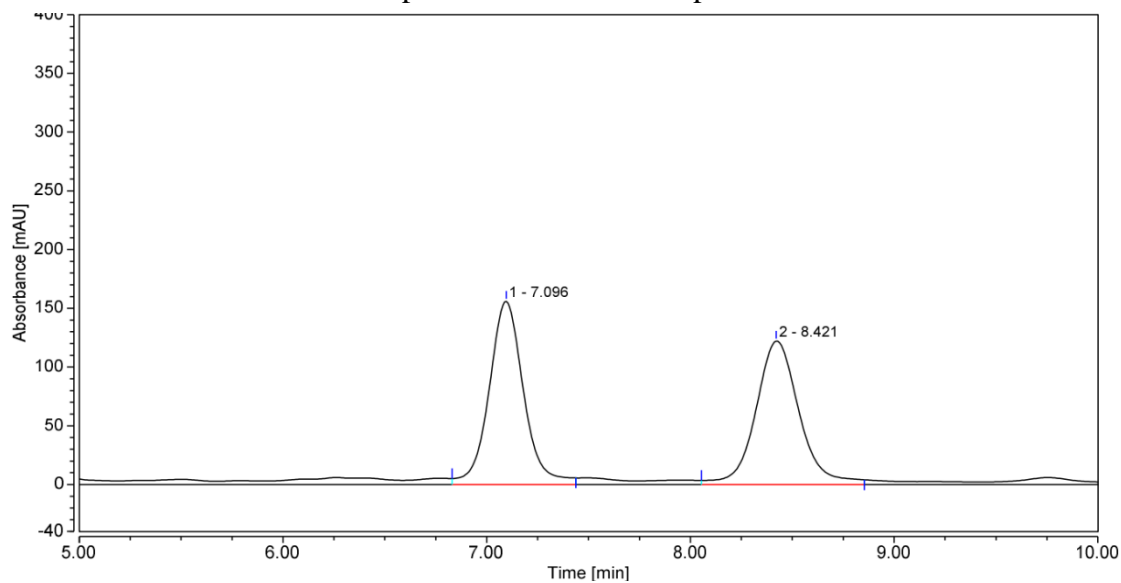

| Integration Results |           |                       |                 |               |                    |                      |                |
|---------------------|-----------|-----------------------|-----------------|---------------|--------------------|----------------------|----------------|
| No.                 | Peak Name | Retention Time<br>min | Area<br>mAU*min | Height<br>mAU | Relative Area<br>% | Relative Height<br>% | Amount<br>n.a. |
| 1                   |           | 7.096                 | 30.620          | 155.910       | 50.44              | 56.08                | n.a.           |
| 2                   |           | 8.421                 | 30.086          | 122.113       | 49.56              | 43.92                | n.a.           |
| Total:              |           |                       | 60.706          | 278.023       | 100.00             | 100.00               |                |

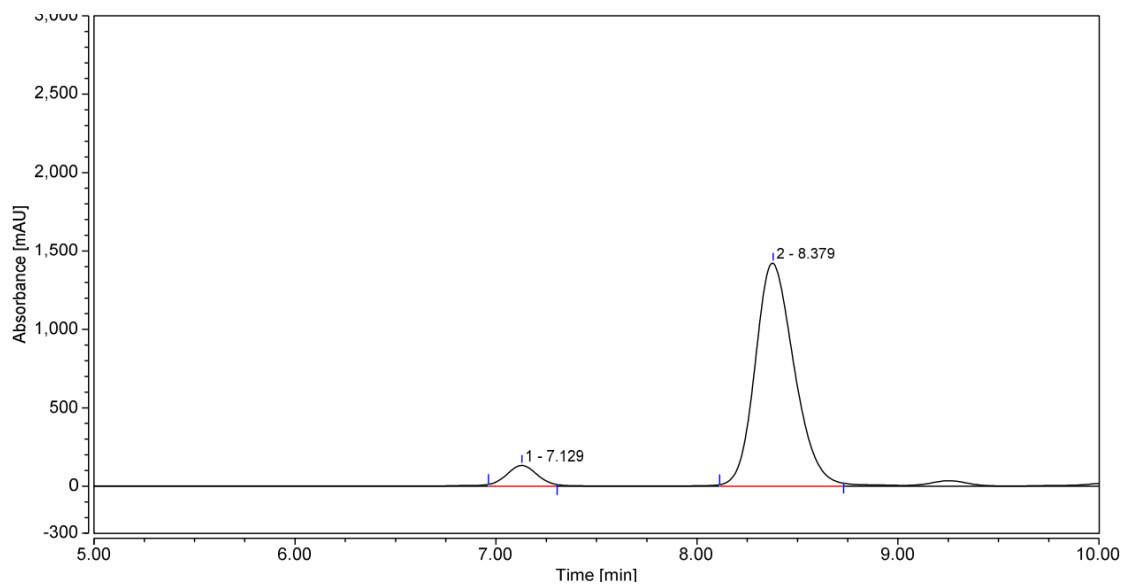

| Integration Results |           |                       |                 |               |                    |                      |                |
|---------------------|-----------|-----------------------|-----------------|---------------|--------------------|----------------------|----------------|
| No.                 | Peak Name | Retention Time<br>min | Area<br>mAU*min | Height<br>mAU | Relative Area<br>% | Relative Height<br>% | Amount<br>n.a. |
| 1                   |           | 7.129                 | 23.426          | 132.621       | 6.83               | 8.53                 | n.a.           |
| 2                   |           | 8.379                 | 319.519         | 1422.083      | 93.17              | 91.47                | n.a.           |
| Total:              |           |                       | 342.945         | 1554.704      | 100.00             | 100.00               |                |

<sup>1</sup>H NMR (400 MHz, CDCl<sub>3</sub>) of compound **Int-1**

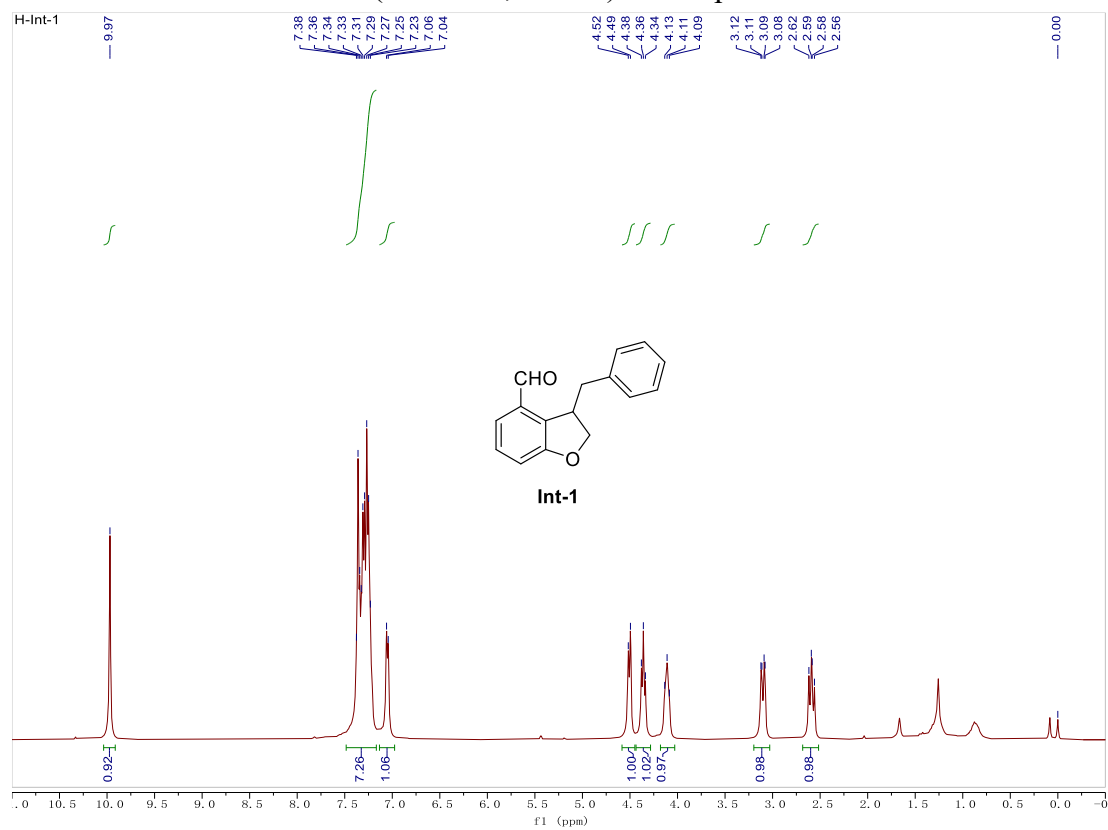

<sup>13</sup>C NMR (101 MHz, CDCl<sub>3</sub>) of compound **Int-1**

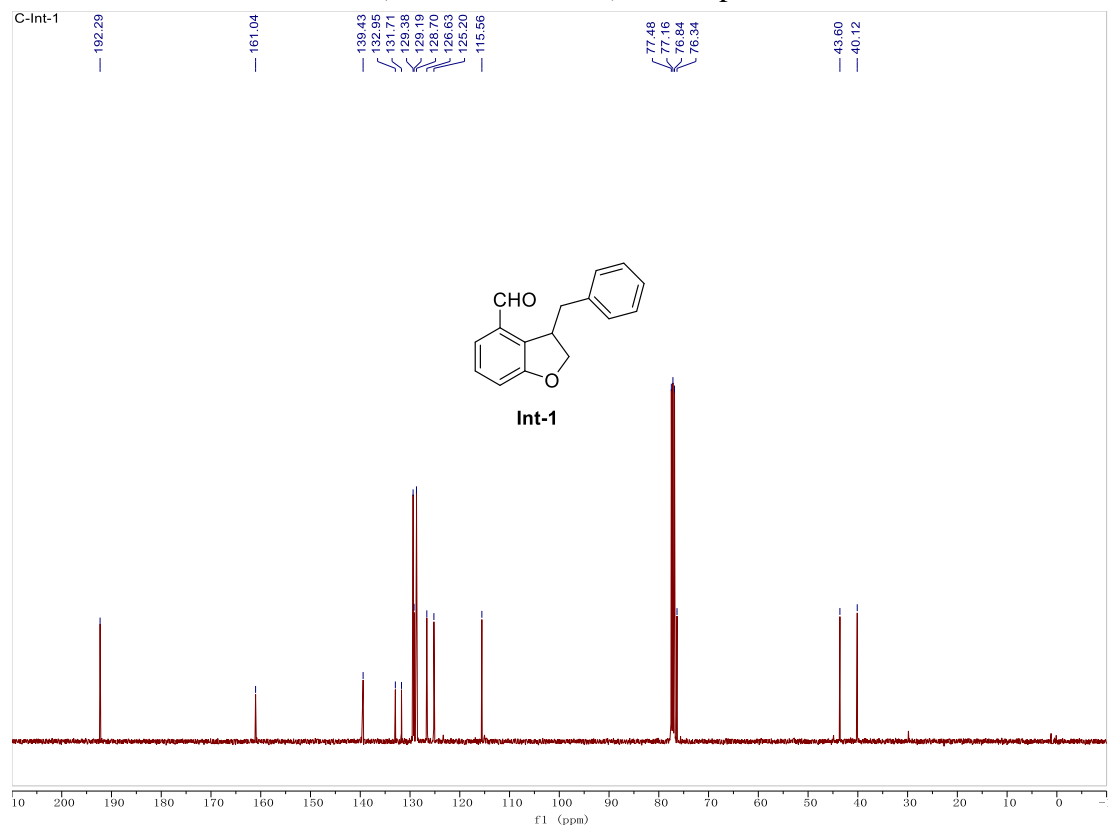

<sup>1</sup>H NMR (400 MHz, CDCl<sub>3</sub>) of compound **Int-1'**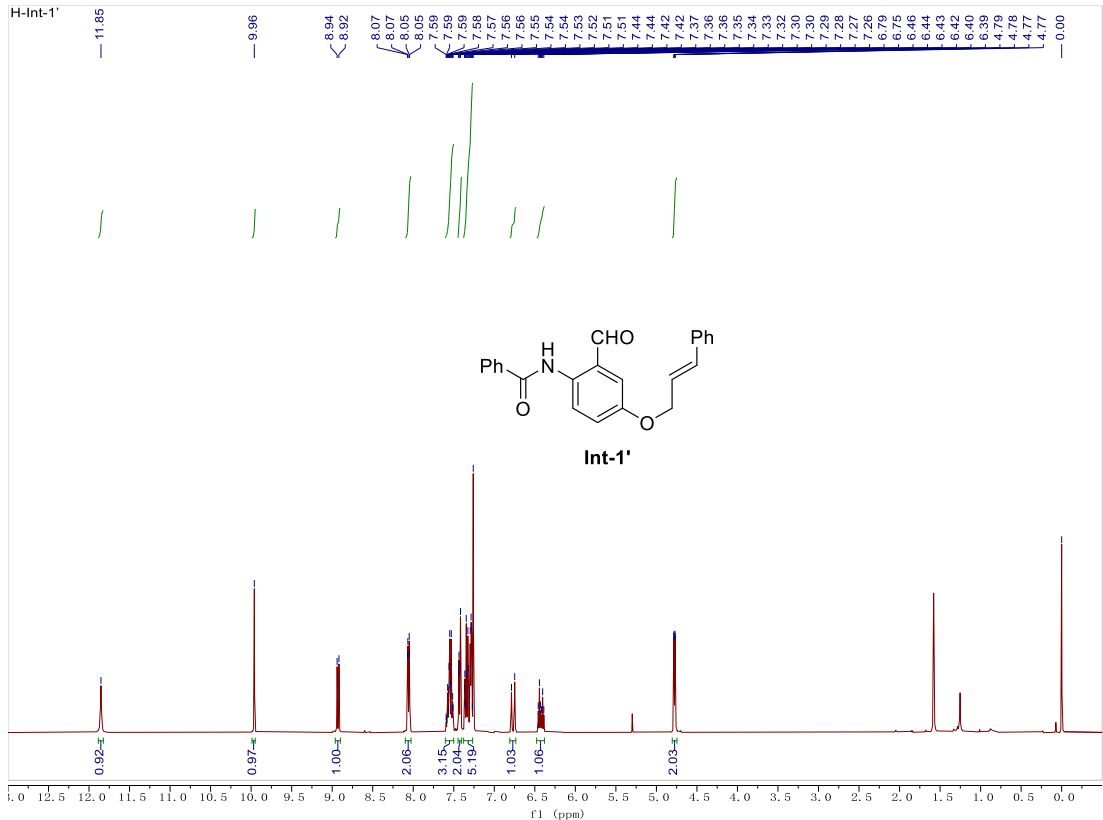<sup>13</sup>C NMR (101 MHz, CDCl<sub>3</sub>) of compound **Int-1'**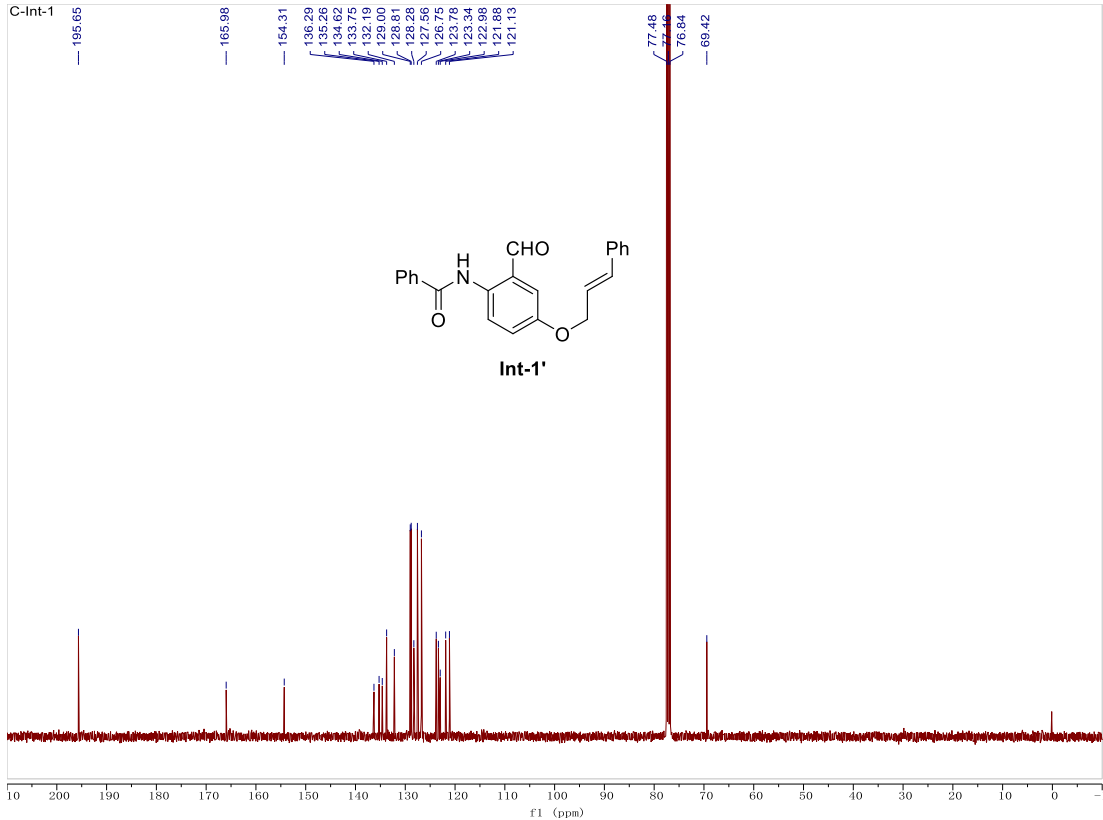

<sup>1</sup>H NMR (400 MHz, CDCl<sub>3</sub>) of compound **Int-2**

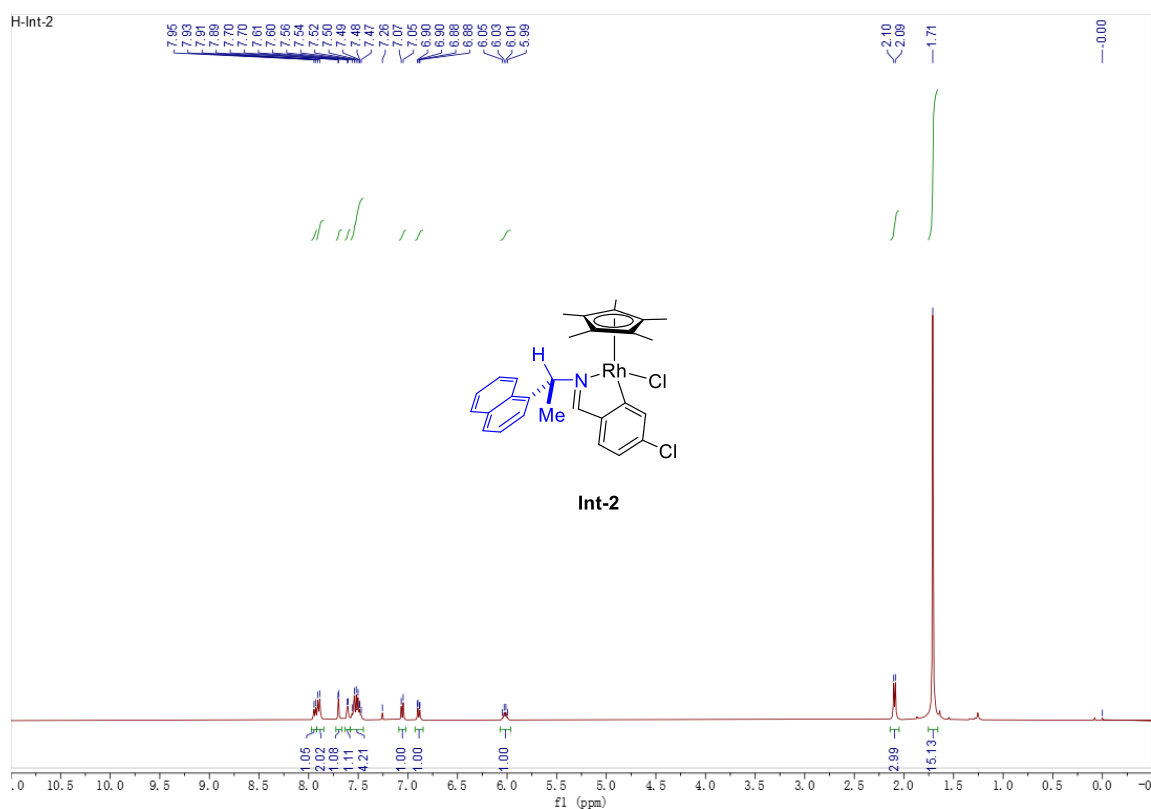

<sup>13</sup>C NMR (101 MHz, CDCl<sub>3</sub>) of compound **Int-2**

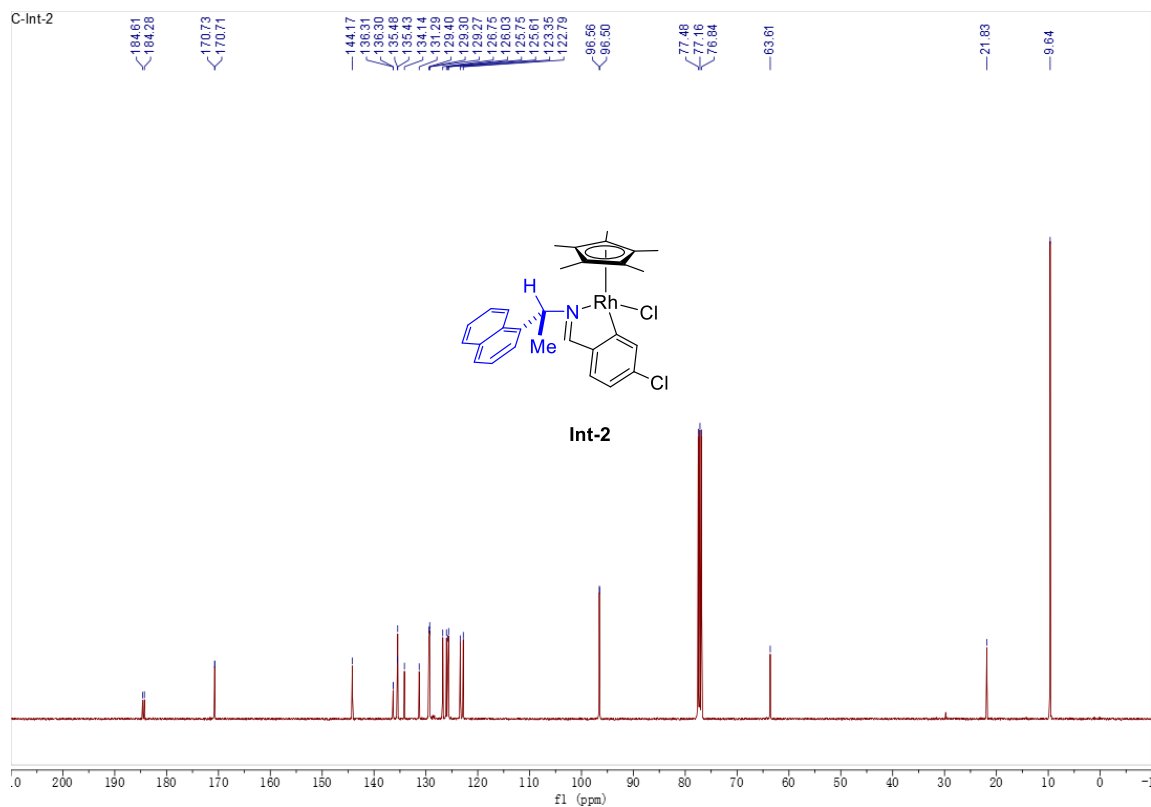

<sup>1</sup>H NMR (400 MHz, CDCl<sub>3</sub>) of compound **5**

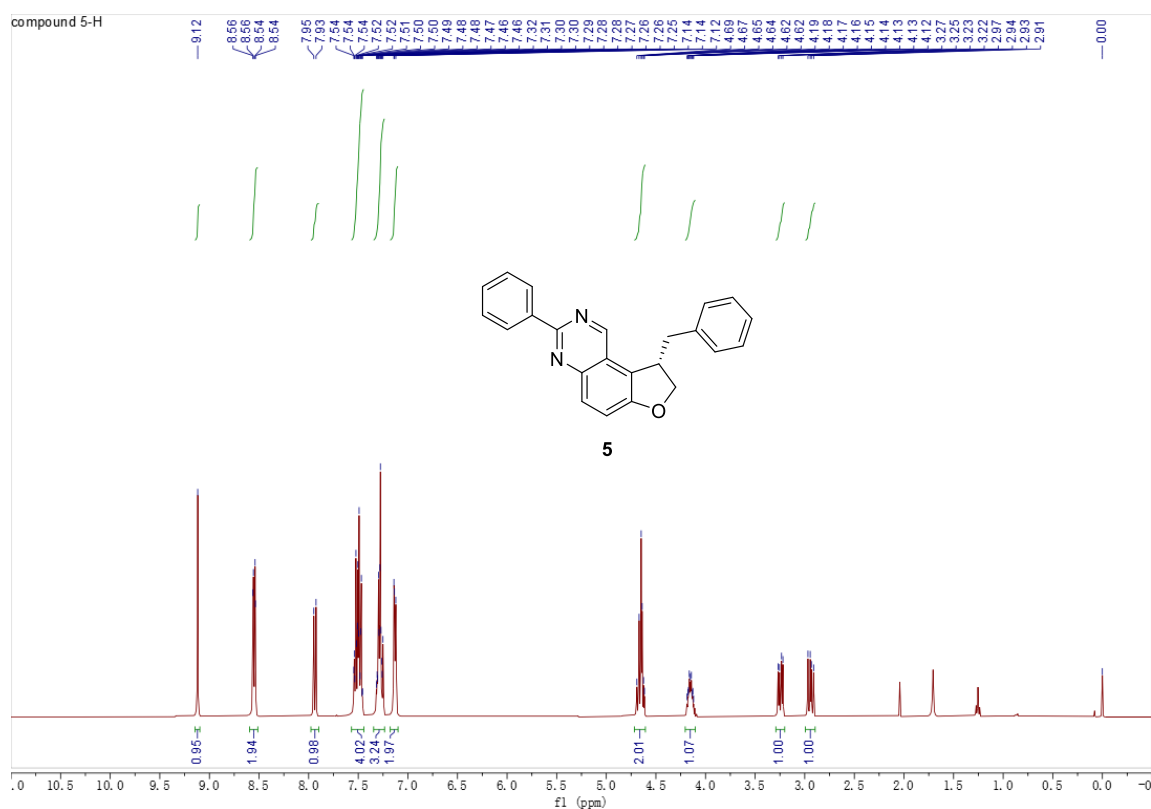

<sup>13</sup>C NMR (101 MHz, CDCl<sub>3</sub>) of compound **5**

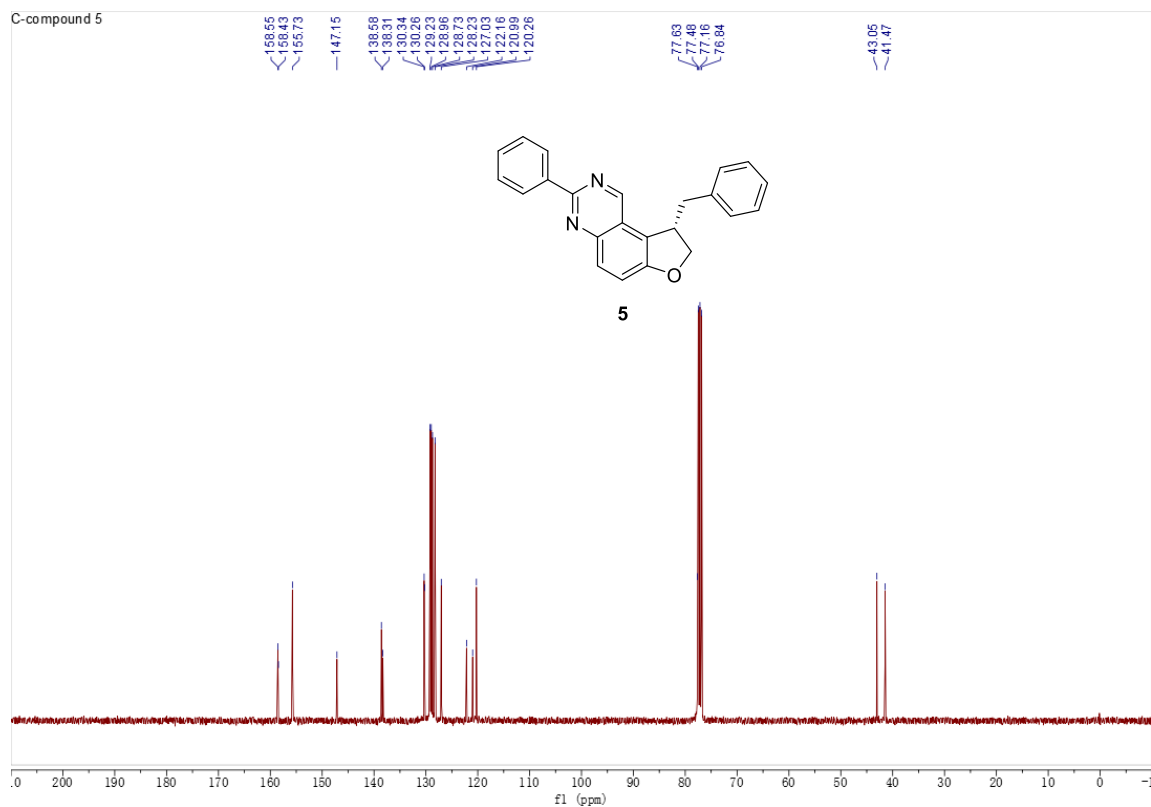

<sup>1</sup>H NMR (400 MHz, CDCl<sub>3</sub>) of compound **6**

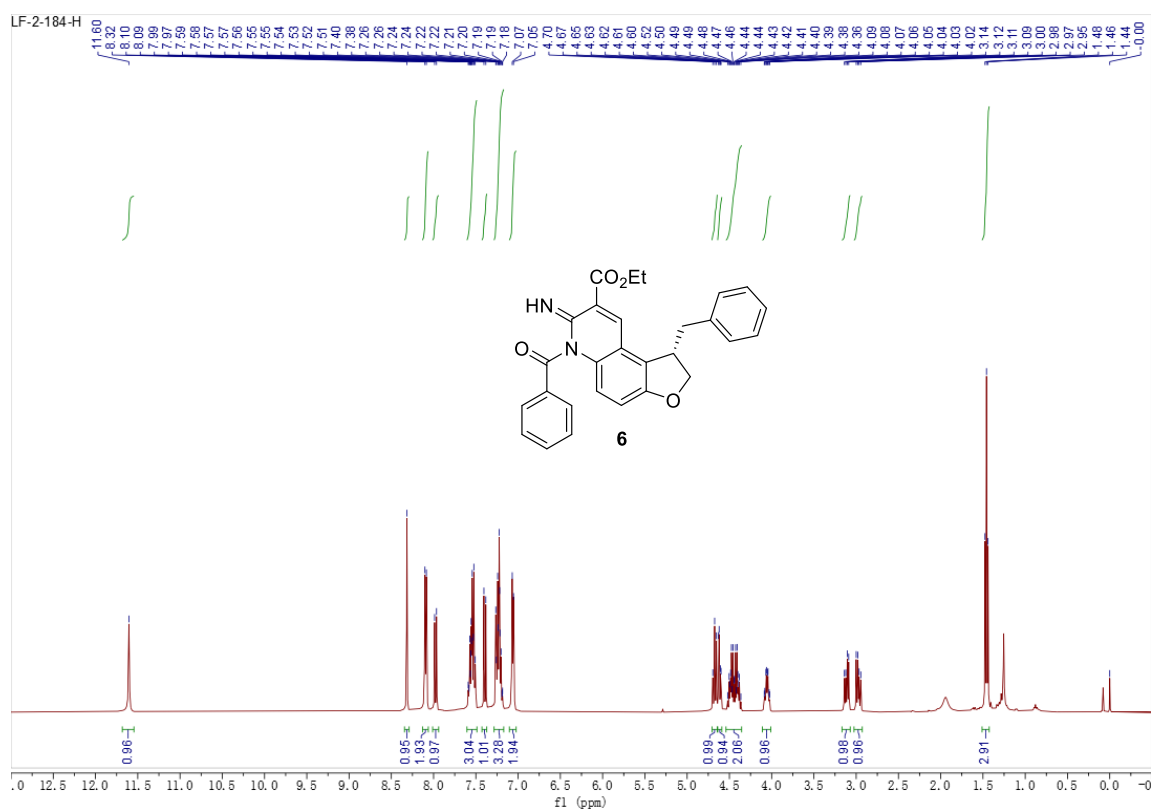

<sup>13</sup>C NMR (101 MHz, CDCl<sub>3</sub>) of compound **6**

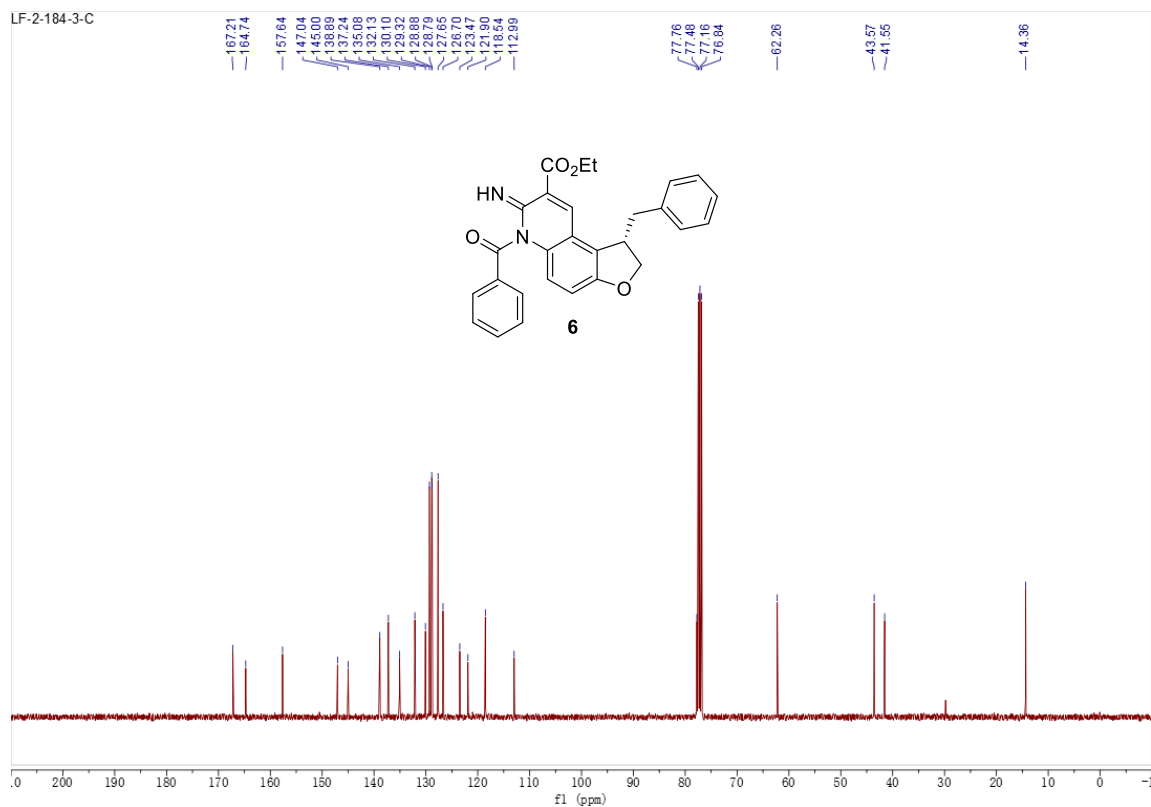

<sup>1</sup>H NMR (400 MHz, CDCl<sub>3</sub>) of compound **7**

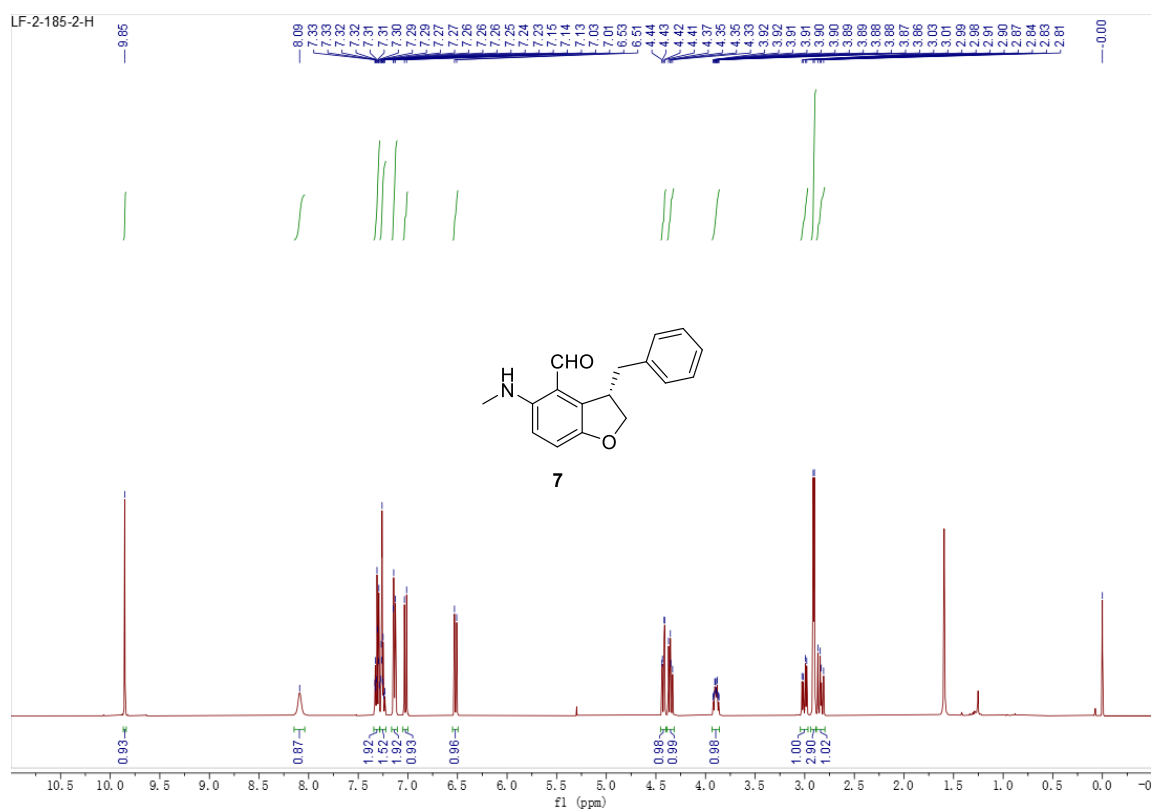

<sup>13</sup>C NMR (101 MHz, CDCl<sub>3</sub>) of compound **7**

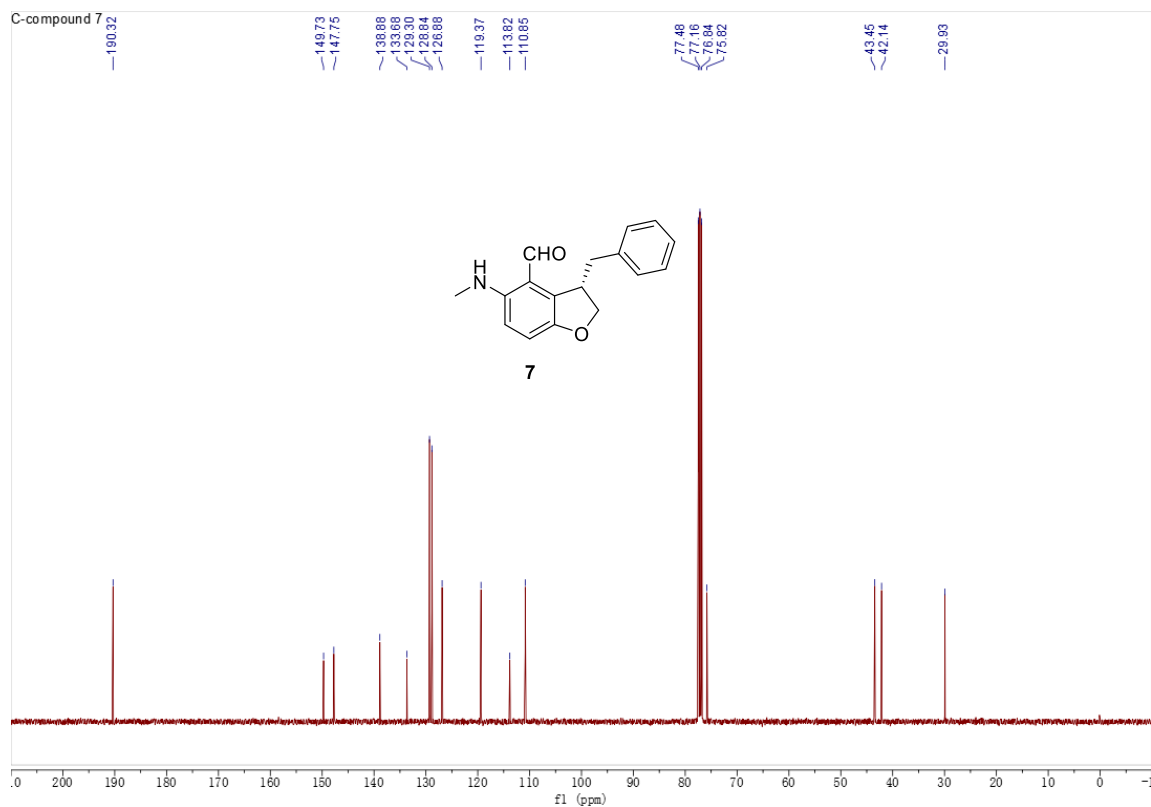

<sup>1</sup>H NMR (400 MHz, CDCl<sub>3</sub>) of compound **8**

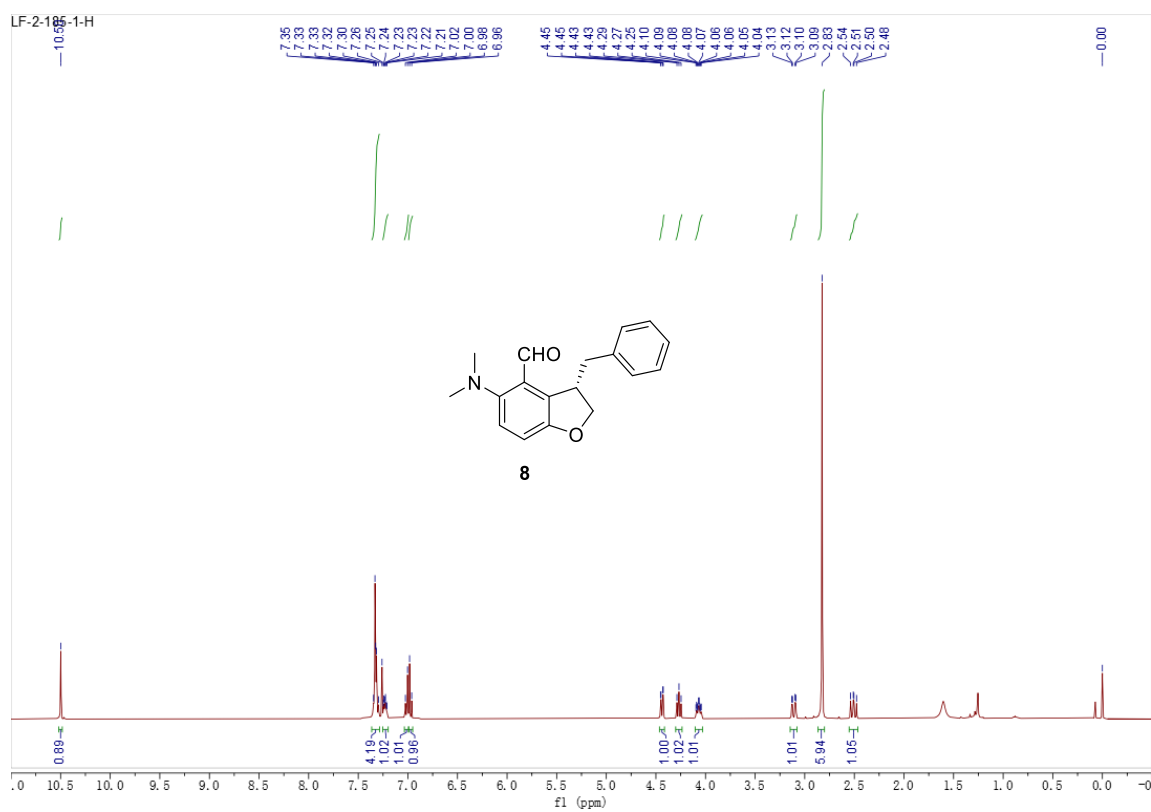

<sup>13</sup>C NMR (101 MHz, CDCl<sub>3</sub>) of compound **8**

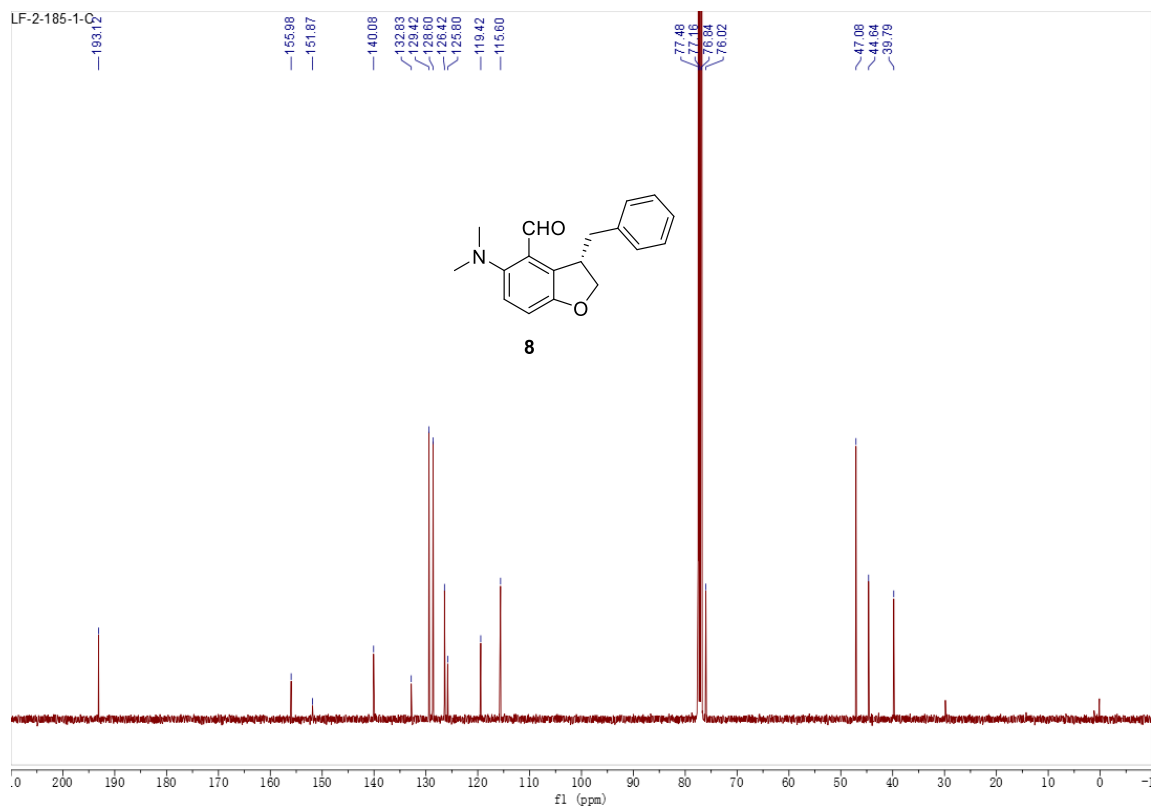

<sup>1</sup>H NMR (400 MHz, CDCl<sub>3</sub>) of compound **9**

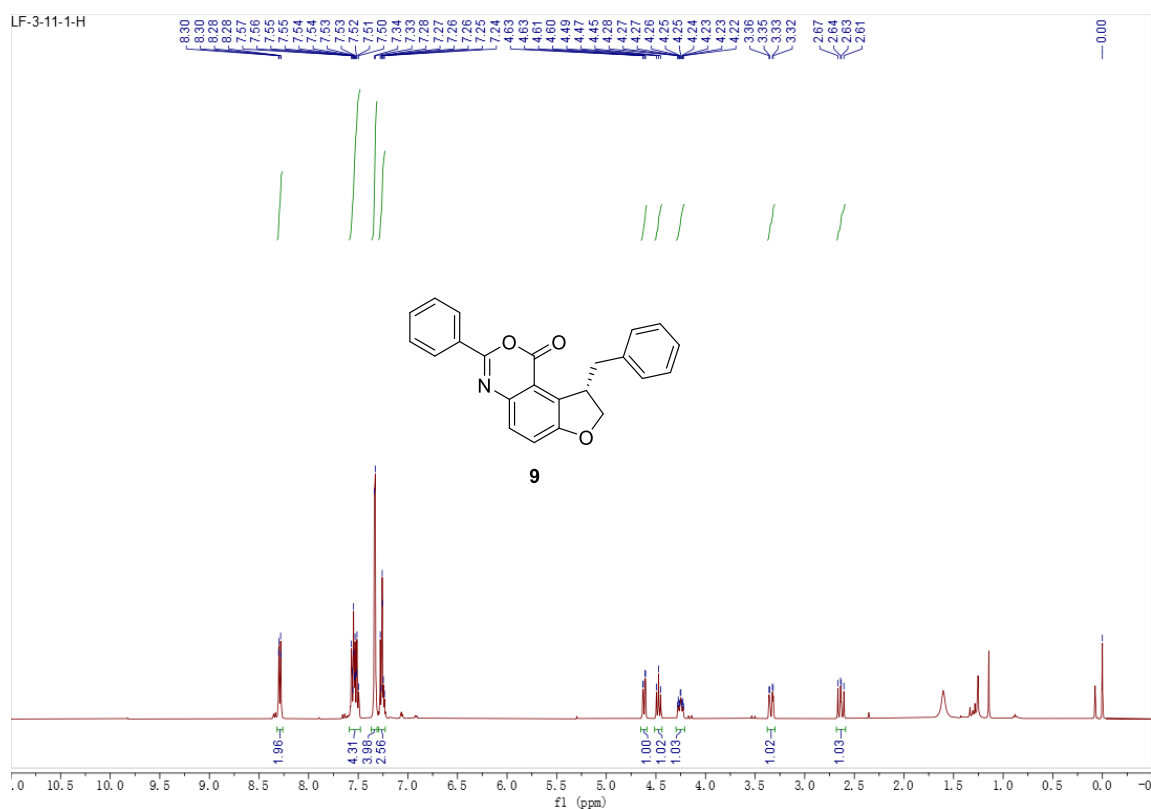

<sup>13</sup>C NMR (101 MHz, CDCl<sub>3</sub>) of compound **9**

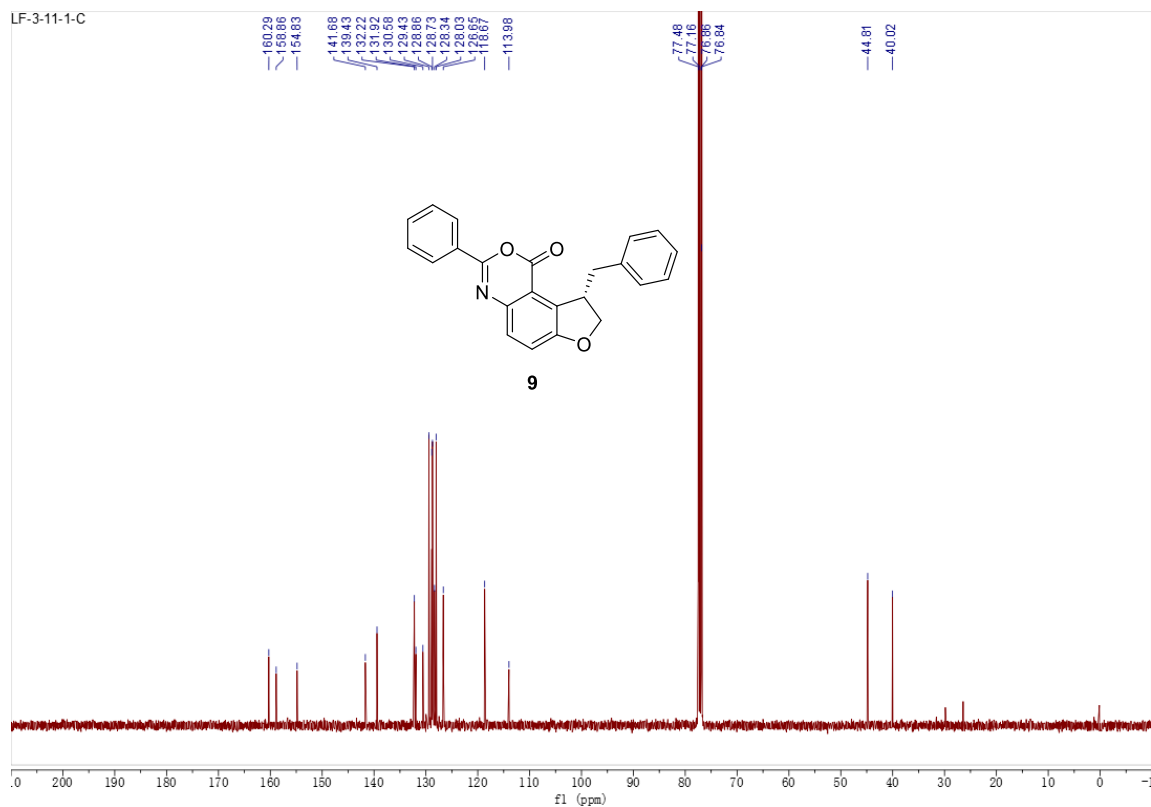

<sup>1</sup>H NMR (400 MHz, CDCl<sub>3</sub>) of compound **10d**

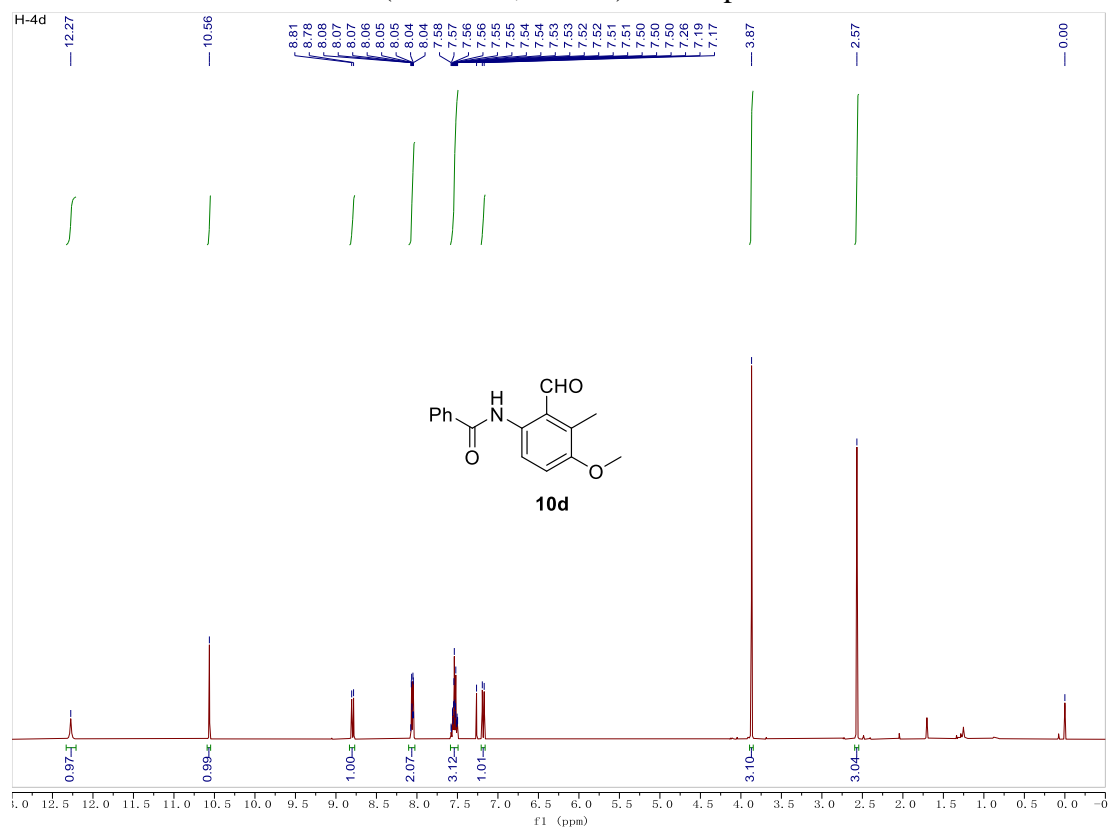

<sup>13</sup>C NMR (101 MHz, CDCl<sub>3</sub>) of compound **10d**

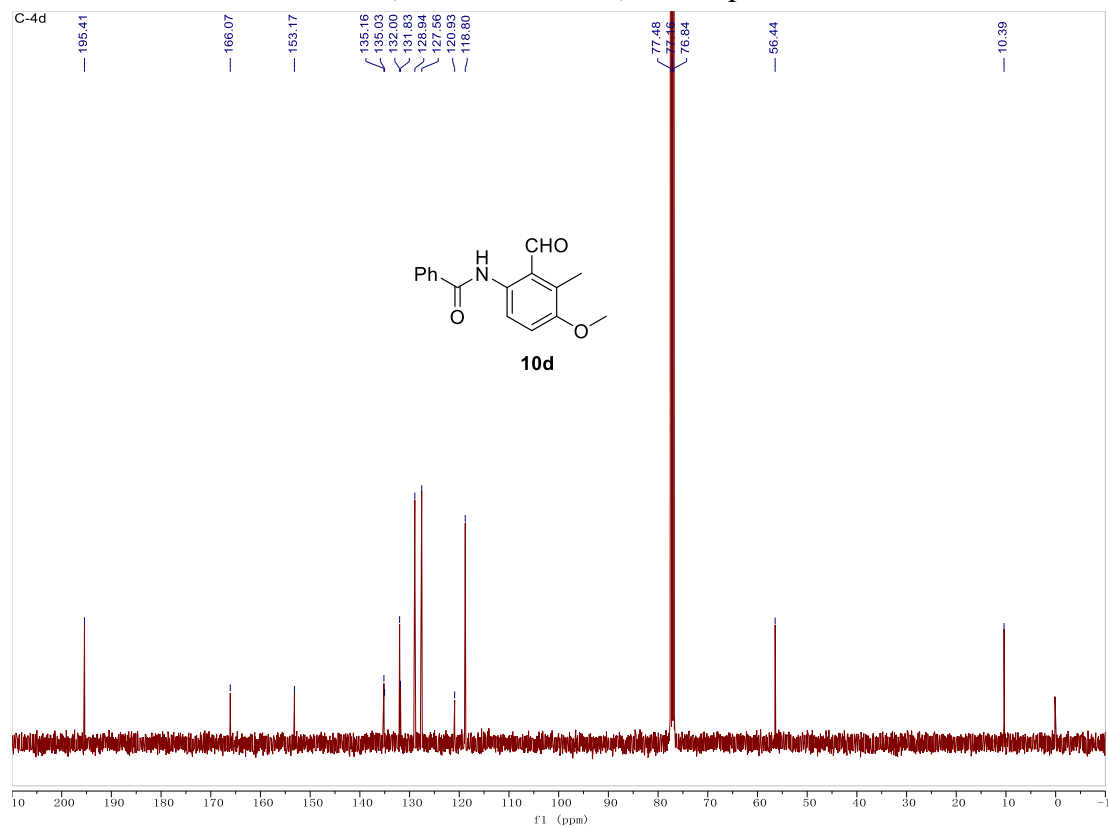

<sup>1</sup>H NMR (400 MHz, CDCl<sub>3</sub>) of compound **10e**

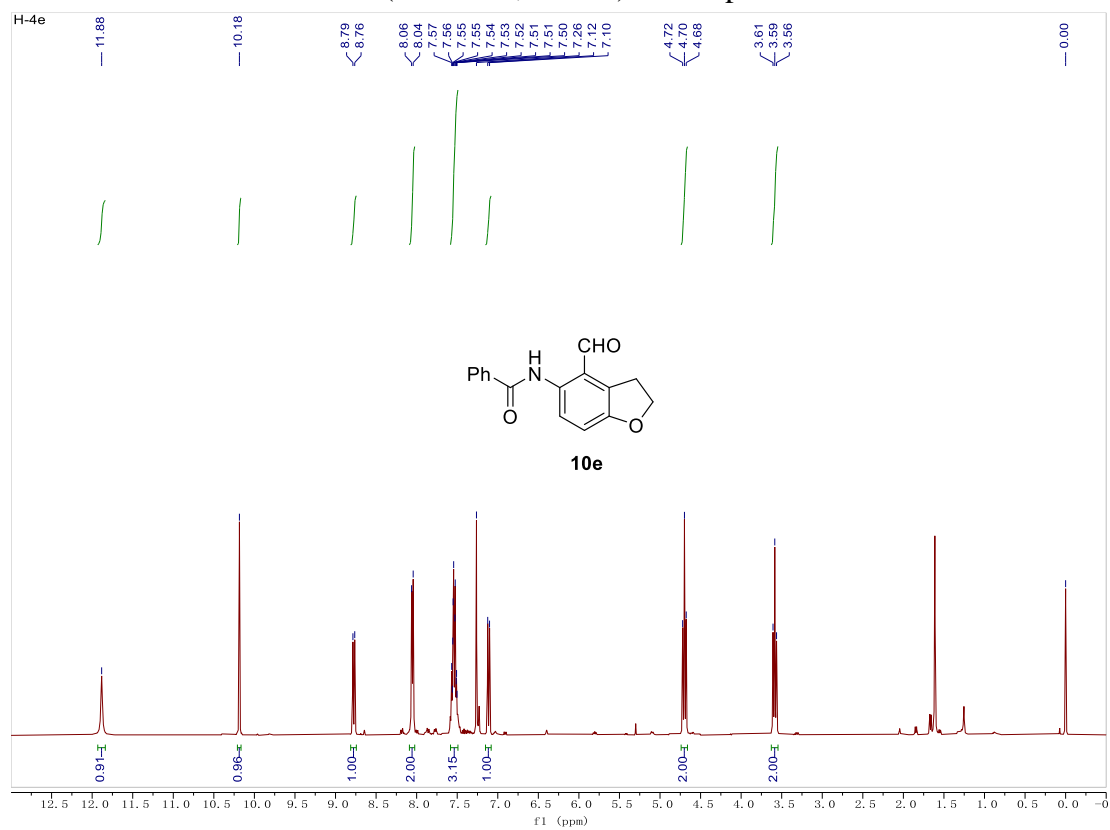

<sup>13</sup>C NMR (101 MHz, CDCl<sub>3</sub>) of compound **10e**

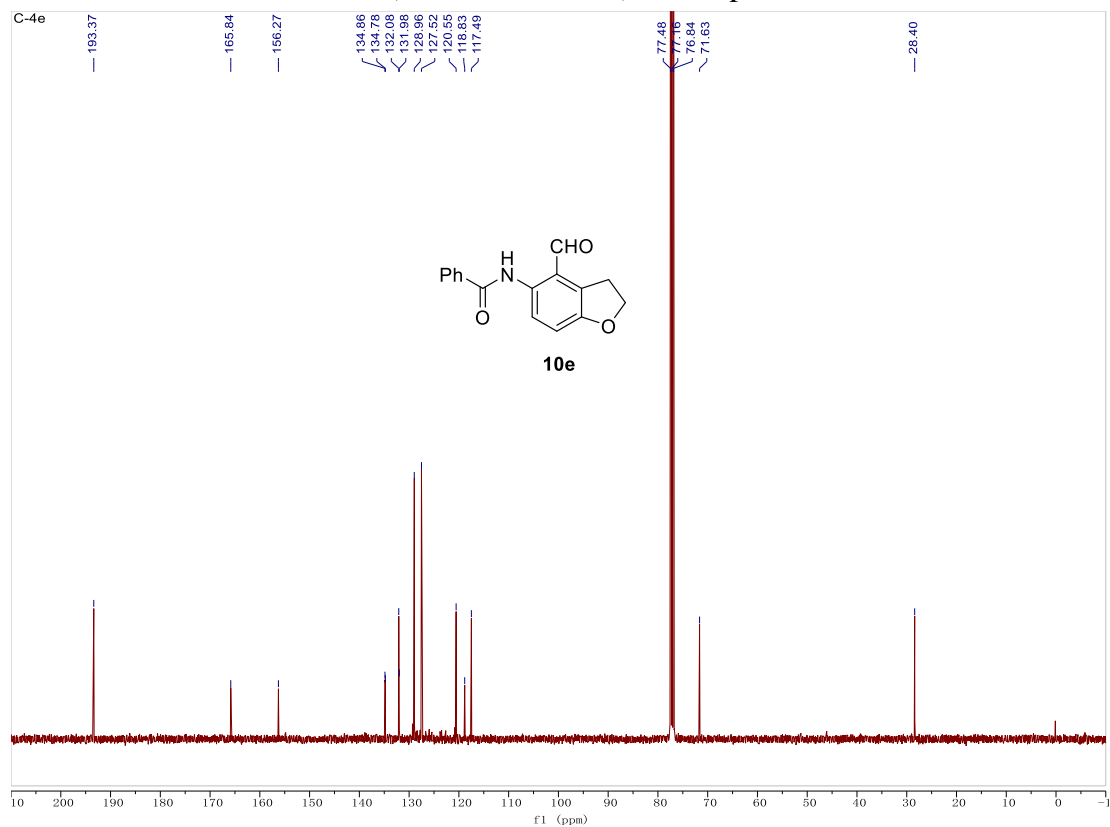

## 20. Crystallographic Data for **3aa**

Crystals of **3aa** (CCDC 2240386) suitable for X-ray analysis were obtained by slow evaporation of a concentrated solution of the compound in a mixture of DCM/Hexanes. Diffraction was performed on a Bruker SMART APEXII CCD area detector diffractometer using graphite-monochromated Cu-K $\alpha$  radiation ( $\lambda = 1.5418 \text{ \AA}$ ) at 273 K, with  $\varphi$  and  $\omega$  scan techniques. An empirical absorption correction was applied with the SADABS program. The structures were solved using Olex2<sup>1</sup> by direct methods using the ShelXT<sup>2</sup> structure solution program. Non-hydrogen atoms were anisotropically refined by full-matrix least-squares calculations based on  $F^2$  using the ShelXL program.<sup>3</sup> Hydrogen atom coordinates were calculated with SHELXTL by using an appropriate riding model with varied thermal parameters. The residual electron densities were not chemical significant. The corresponding data could be obtained from the Cambridge Crystallographic Data Centre via [www.ccdc.cam.ac.uk/data\\_request/cif](http://www.ccdc.cam.ac.uk/data_request/cif).

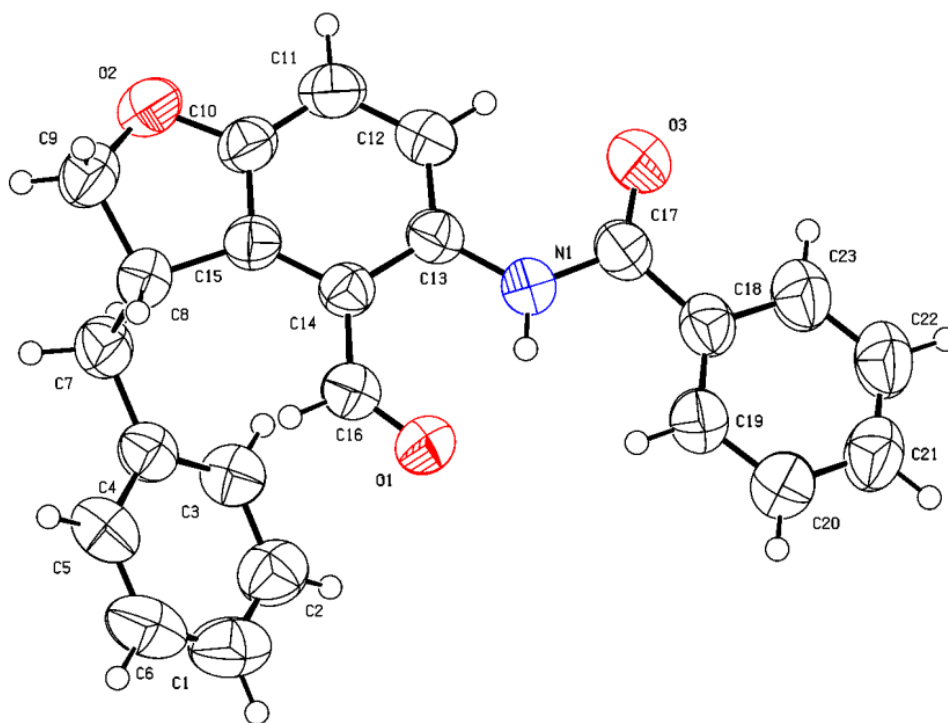

ORTEP diagram drawn with 50% ellipsoid probability of compound **3aa**

Bond precision: C-C = 0.0057 Å

Wavelength = 1.54178

Cell:      a = 5.0070 (1)      b = 17.1218 (4)      c = 21.1670 (4)  
             alpha = 90                beta = 90                gamma = 90

Temperature: 273 K

|                                     | Calculated                                      | Reported                                                       |
|-------------------------------------|-------------------------------------------------|----------------------------------------------------------------|
| Volume                              | 1814.62 (7)                                     | 1814.62 (7)                                                    |
| Space group                         | P 21 21 21                                      | P 21 21 21                                                     |
| Hall group                          | P 2ac 2ab                                       | P 2ac 2ab                                                      |
| Moiety formula                      | C <sub>23</sub> H <sub>19</sub> NO <sub>3</sub> | 4 (C <sub>23</sub> H <sub>19</sub> NO <sub>3</sub> )           |
| Sum formula                         | C <sub>23</sub> H <sub>19</sub> NO <sub>3</sub> | C <sub>92</sub> H <sub>76</sub> N <sub>4</sub> O <sub>12</sub> |
| Mr                                  | 357.39                                          | 1429.56                                                        |
| D <sub>x</sub> , g cm <sup>-3</sup> | 1.308                                           | 1.308                                                          |
| Z                                   | 4                                               | 1                                                              |
| Mu (mm <sup>-1</sup> )              | 0.698                                           | 0.698                                                          |
| F <sub>000</sub>                    | 752.0                                           | 752.0                                                          |
| F <sub>000</sub> '                  | 754.27                                          |                                                                |
| h,k,l <sub>max</sub>                | 5, 20, 25                                       | 5, 20, 25                                                      |
| N <sub>ref</sub>                    | 3201 [1894]                                     | 3196                                                           |
| T <sub>min</sub> , T <sub>max</sub> |                                                 | 0.646, 0.753                                                   |
| T <sub>min</sub> '                  |                                                 |                                                                |

Correction method= # Reported T Limits: T<sub>min</sub>= 0.646 T<sub>max</sub> = 0.753

AbsCorr = NONE

Data completeness= 1.69/1.00      Theta (max) = 66.732

R (reflections)= 0.0584 (2311)      wR<sub>2</sub> (reflections) = 0.1415 (3196)

S = 1.011      N<sub>par</sub>= 244

## 21. Crystallographic Data for Int-2

Crystals of **Int-2** (CCDC 2279645) suitable for X-ray analysis were obtained by slow evaporation of a concentrated solution of the compound in a mixture of DCM/Hexanes. Diffraction was performed on a Bruker SMART APEXII CCD area detector diffractometer using graphite-monochromated Mo-K $\alpha$  radiation ( $\lambda = 0.71073$  Å) at 297 K, with  $\varphi$  and  $\omega$  scan techniques. An empirical absorption correction was applied with the SADABS program. The structures were solved using Olex2<sup>1</sup> by direct methods using the ShelXT<sup>2</sup> structure solution program. Non-hydrogen atoms were anisotropically refined by full-matrix least-squares calculations based on  $F^2$  using the ShelXL program.<sup>3</sup> Hydrogen atom coordinates were calculated with SHELXTL by using an appropriate riding model with varied thermal parameters. The residual electron densities were not chemical significant. The corresponding data could be obtained from the Cambridge Crystallographic Data Centre via [www.ccdc.cam.ac.uk/data\\_request/cif](http://www.ccdc.cam.ac.uk/data_request/cif).

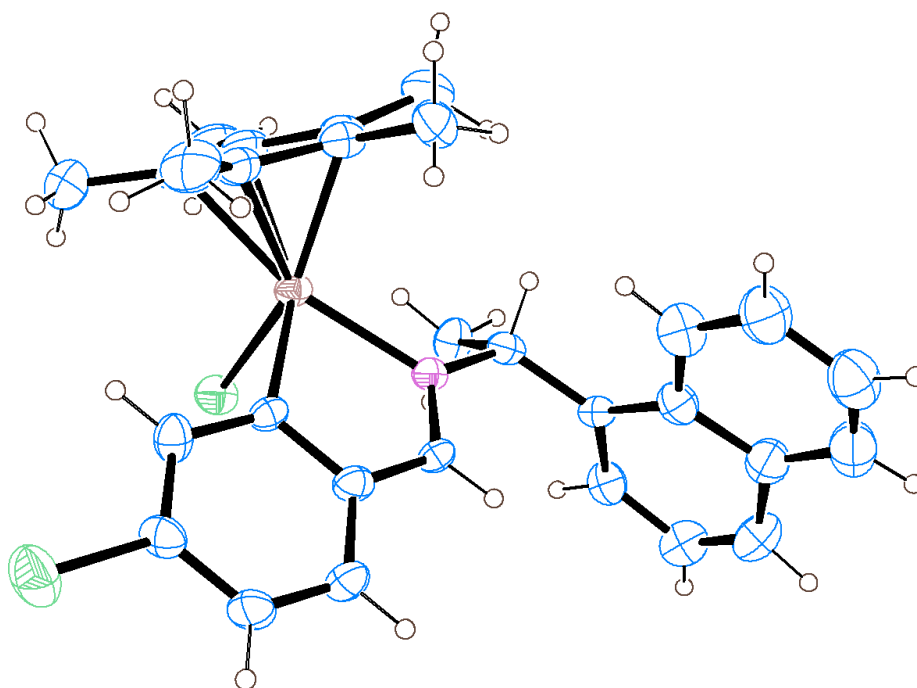

ORTEP diagram drawn with 30% ellipsoid probability of compound **Int-2**

Bond precision: C-C = 0.0177 Å

Wavelength= 0.71073

Cell:      a = 7.7412 (5)      b = 15.9286 (16)      c = 26.521 (3)  
              alpha = 90                beta = 90                gamma = 90

Temperature: 297 K

|                        | Calculated                                                    | Reported                                            |
|------------------------|---------------------------------------------------------------|-----------------------------------------------------|
| Volume                 | 3270.2 (5)                                                    | 3270.2 (5)                                          |
| Space group            | P 21 21 21                                                    | P 21 21 21                                          |
| Hall group             | P 2ac 2ab                                                     | P 2ac 2ab                                           |
| Moiety formula         | C <sub>29</sub> H <sub>30</sub> Cl <sub>2</sub> NRh[+solvent] | C <sub>29</sub> H <sub>30</sub> Cl <sub>2</sub> NRh |
| Sum formula            | C <sub>29</sub> H <sub>30</sub> Cl <sub>2</sub> NRh[+solvent] | C <sub>29</sub> H <sub>30</sub> Cl <sub>2</sub> NRh |
| Mr                     | 566.35                                                        | 566.35                                              |
| Dx, g cm <sup>-3</sup> | 1.150                                                         | 1.150                                               |
| Z                      | 4                                                             | 4                                                   |
| Mu (mm <sup>-1</sup> ) | 0.699                                                         | 0.699                                               |
| F000                   | 1160.0                                                        | 1160.0                                              |
| F000'                  | 1157.01                                                       |                                                     |
| h,k,lmax               | 9, 19, 32                                                     | 8, 19, 32                                           |
| Nref                   | 6099 [3469]                                                   | 5886                                                |
| Tmin,Tmax              | 0.857, 0.870                                                  | 0.618, 0.746                                        |
| Tmin'                  | 0.857                                                         |                                                     |

Correction method= # Reported T Limits: Tmin = 0.618 Tmax = 0.746

AbsCorr = NONE

Data completeness= 1.70/0.97      Theta (max) = 25.498

R (reflections)= 0.0713 (4478)      wR2 (reflections) = 0.2188 (5886)

S = 1.067      Npar = 284

## 22. Photophysical Spectra of 3aa-3zaa, 3ab-3ao, 7, 8 and 10a-10e

**Table S1. Photophysical properties of selected compounds in DCM.**

| compounds   | $\lambda_{\text{max}}^{\text{abs}}$ (nm) | $\lambda_{\text{max}}^{\text{em}}$ (nm) | $\epsilon_{\text{max}}^a$ | $\Phi^b$ | Stokes shift (cm <sup>-1</sup> ) |
|-------------|------------------------------------------|-----------------------------------------|---------------------------|----------|----------------------------------|
| <b>3aa</b>  | 394                                      | 500                                     | 7500                      | 0.223    | 5400                             |
| <b>3ba</b>  | 392                                      | 502                                     | 5700                      | 0.203    | 5600                             |
| <b>3ca</b>  | 396                                      | 501                                     | 6400                      | 0.223    | 5300                             |
| <b>3da</b>  | 394                                      | 500                                     | 5300                      | 0.228    | 5400                             |
| <b>3ea</b>  | 396                                      | 500                                     | 6100                      | 0.245    | 5300                             |
| <b>3fa</b>  | 394                                      | 502                                     | 6900                      | 0.188    | 5500                             |
| <b>3ga</b>  | 396                                      | 499                                     | 6400                      | 0.230    | 5200                             |
| <b>3ha</b>  | 396                                      | 496                                     | 7000                      | 0.204    | 5100                             |
| <b>3ia</b>  | 392                                      | 502                                     | 5800                      | 0.222    | 5600                             |
| <b>3ja</b>  | 394                                      | 498                                     | 7300                      | 0.220    | 5300                             |
| <b>3ka</b>  | 392                                      | 498                                     | 6400                      | 0.171    | 5400                             |
| <b>3la</b>  | 396                                      | 501                                     | 6100                      | 0.212    | 5300                             |
| <b>3ma</b>  | 396                                      | 497                                     | 6800                      | 0.199    | 5100                             |
| <b>3na</b>  | 396                                      | 502                                     | 7300                      | 0.203    | 5300                             |
| <b>3oa</b>  | 395                                      | 501                                     | 3100                      | 0.185    | 5400                             |
| <b>3pa</b>  | 398                                      | 505                                     | 6400                      | 0.191    | 5300                             |
| <b>3qa</b>  | 394                                      | 501                                     | 8400                      | 0.160    | 5400                             |
| <b>3ra</b>  | 394                                      | 501                                     | 3900                      | 0.153    | 5400                             |
| <b>3sa</b>  | 392                                      | 501                                     | 3900                      | 0.152    | 5600                             |
| <b>3ta</b>  | 394                                      | 501                                     | 3300                      | 0.151    | 5400                             |
| <b>3ua</b>  | 390                                      | 502                                     | 4700                      | 0.149    | 5700                             |
| <b>3va</b>  | 388                                      | 502                                     | 5900                      | 0.143    | 5900                             |
| <b>3wa</b>  | 375                                      | 477                                     | 7500                      | 0.225    | 5700                             |
| <b>3xa</b>  | 385                                      | 487                                     | 3900                      | 0.233    | 5400                             |
| <b>3ya</b>  | 363                                      | 496                                     | 200                       | 0.010    | 7400                             |
| <b>3za</b>  | 351                                      | 472                                     | 400                       | 0.026    | 7300                             |
| <b>3zaa</b> | 336                                      | 525                                     | 700                       | 0.041    | 10700                            |
| <b>3ab</b>  | 398                                      | 504                                     | 6600                      | 0.212    | 5300                             |
| <b>3ac</b>  | 396                                      | 504                                     | 8500                      | 0.245    | 5400                             |
| <b>3ad</b>  | 394                                      | 500                                     | 6000                      | 0.161    | 5400                             |
| <b>3ae</b>  | 394                                      | 502                                     | 600                       | 0.165    | 5500                             |
| <b>3af</b>  | 394                                      | 499                                     | 7600                      | 0.163    | 5300                             |
| <b>3ag</b>  | 396                                      | 503                                     | 6600                      | 0.214    | 5400                             |
| <b>3ah</b>  | 394                                      | 498                                     | 6200                      | 0.224    | 5300                             |
| <b>3ai</b>  | 394                                      | 499                                     | 6600                      | 0.136    | 5300                             |
| <b>3aj</b>  | 392                                      | 499                                     | 6200                      | 0.141    | 5500                             |
| <b>3ak</b>  | 388                                      | 495                                     | 6700                      | 0.092    | 5600                             |
| <b>3al</b>  | 394                                      | 502                                     | 7200                      | 0.178    | 5500                             |
| <b>3am</b>  | 390                                      | 498                                     | 5500                      | 0.196    | 5600                             |
| <b>3an</b>  | 388                                      | 498                                     | 5400                      | 0.258    | 5700                             |
| <b>3ao</b>  | 386                                      | 498                                     | 6200                      | 0.248    | 5800                             |
| <b>7</b>    | 442                                      | 538                                     | 5100                      | 0.056    | 3400                             |
| <b>8</b>    | 404                                      | 519                                     | 5400                      | 0.366    | 5500                             |
| <b>10a</b>  | 340                                      | 418, 544                                | 5200                      | 0.323    | 11000                            |

|            |     |          |      |       |       |
|------------|-----|----------|------|-------|-------|
| <b>10b</b> | 355 | 432, 556 | 5600 | 0.019 | 10200 |
| <b>10c</b> | 369 | 456      | 5500 | 0.287 | 5200  |
| <b>10d</b> | 386 | 500      | 7600 | 0.045 | 5900  |
| <b>10e</b> | 398 | 500      | 6800 | 0.232 | 5100  |

<sup>a</sup> Corresponding to the strongest absorption maximum, the unit for  $\epsilon$  is  $\text{M}^{-1} \text{cm}^{-1}$ . <sup>b</sup> Absolute fluorescence quantum yield.

**Table S2. Photophysical properties of compound 3aa in different solvents.**

| solvent | $\lambda_{\text{max}}^{\text{abs}}$ (nm) | $\lambda_{\text{max}}^{\text{em}}$ (nm) | $\epsilon_{\text{max}}^a$ | $\Phi^b$ | Stokes shift ( $\text{cm}^{-1}$ ) |
|---------|------------------------------------------|-----------------------------------------|---------------------------|----------|-----------------------------------|
| hexanes | 398                                      | 485                                     | 3900                      | 0.204    | 4500                              |
| toluene | 396                                      | 495                                     | 4600                      | 0.217    | 5100                              |
| THF     | 394                                      | 498                                     | 4300                      | 0.107    | 5300                              |
| DMSO    | 372                                      | 501                                     | 2000                      | 0.063    | 6900                              |

<sup>a</sup> Corresponding to the strongest absorption maximum, the unit for  $\epsilon$  is  $\text{M}^{-1} \text{cm}^{-1}$ . <sup>b</sup> Absolute fluorescence quantum yield.

**Figure S3. Absorption and emission spectra of 3aa in water/DMSO solution**

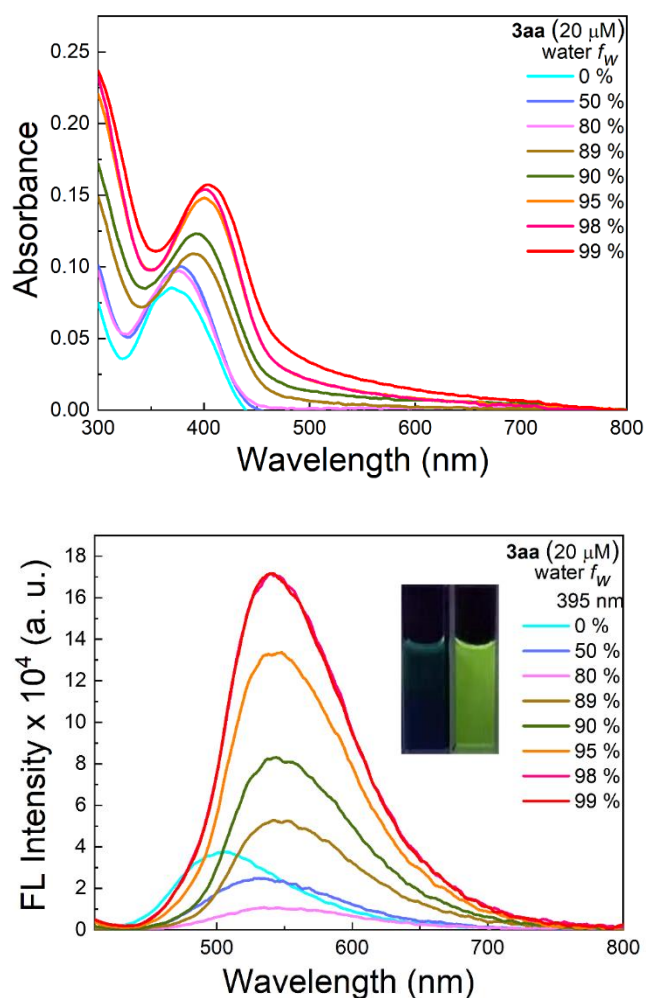

**Figure S4. Emission spectra of 10a in different solvents**

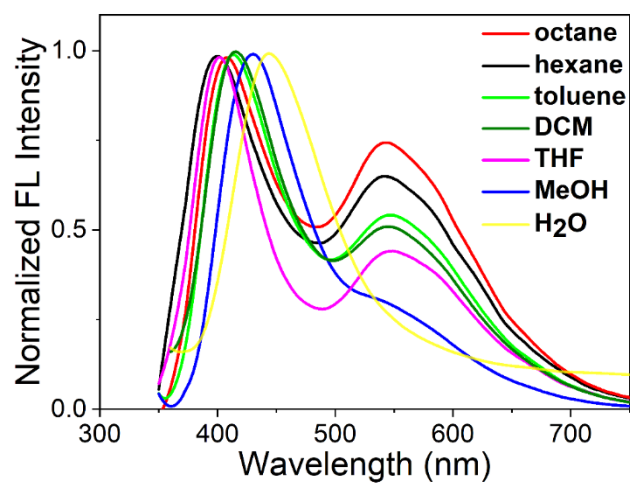

**Figure S5. Absorption and emission spectra of 7 and 8 in DCM solution**

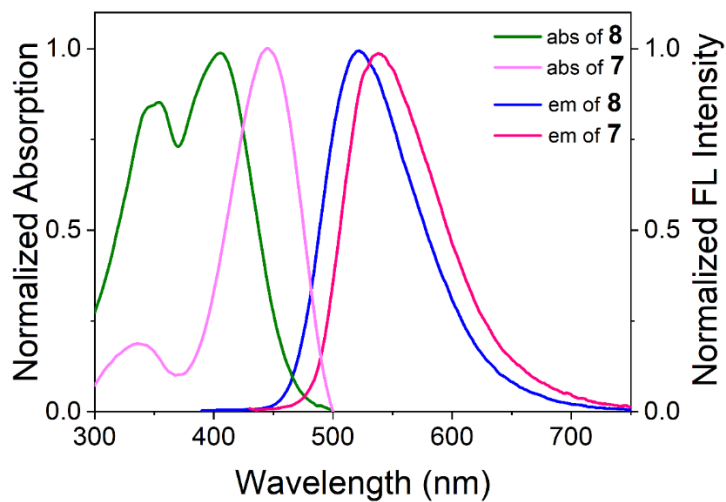

**Absorption and emission spectra of substrates**

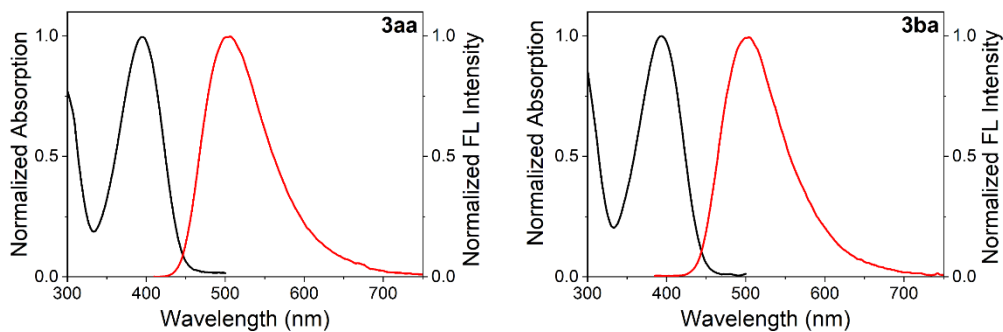

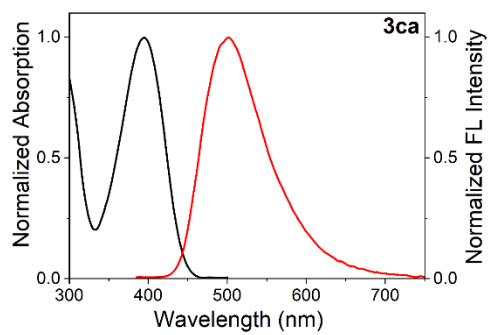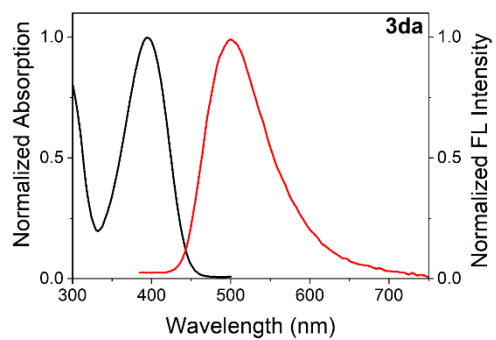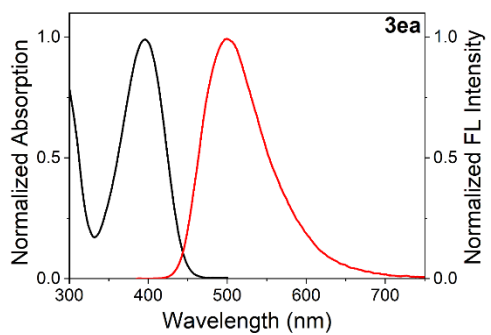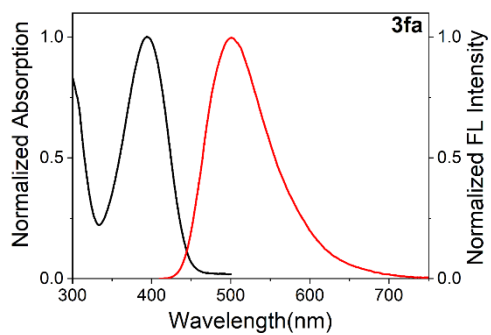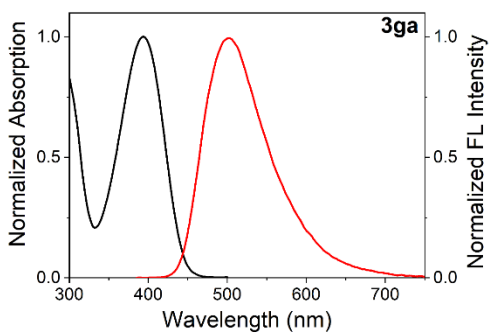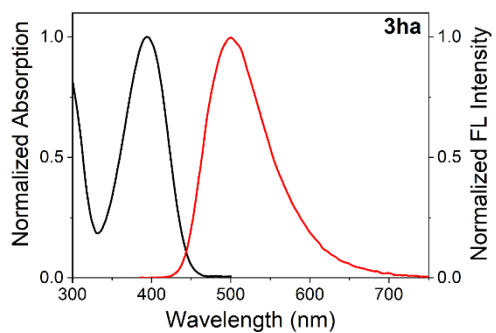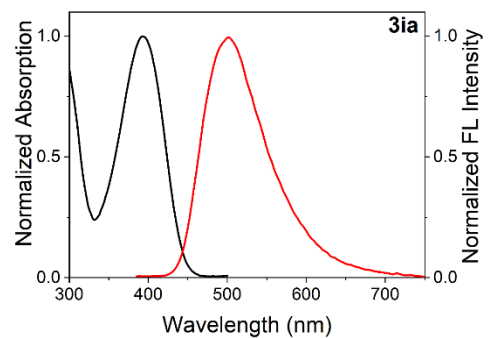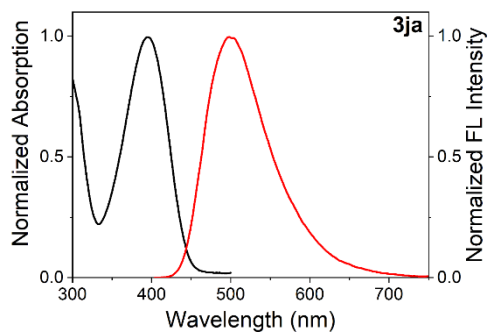

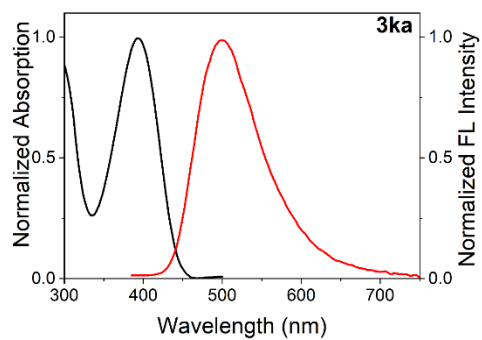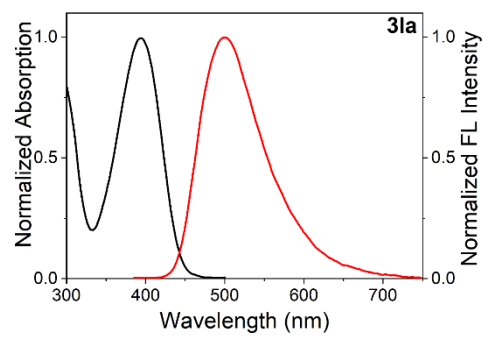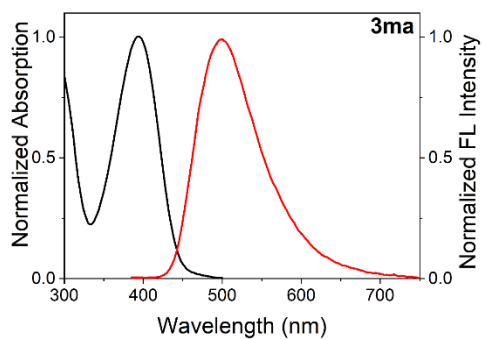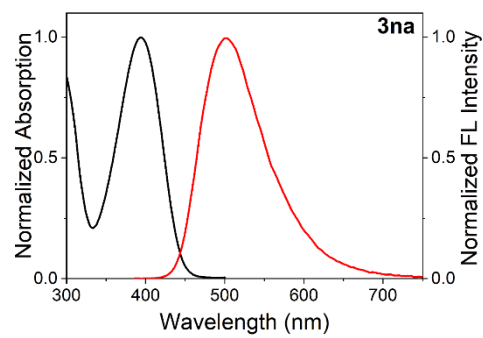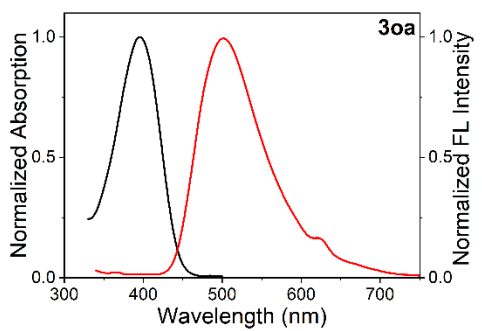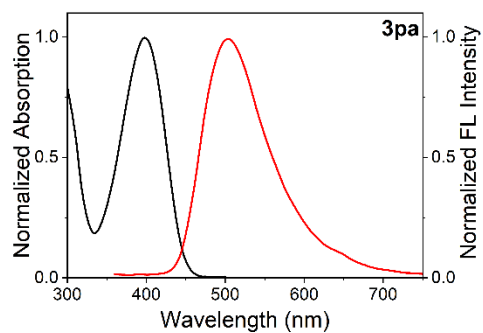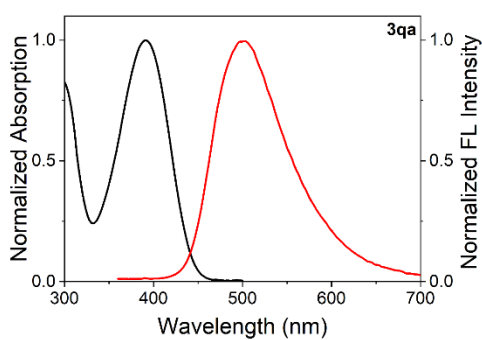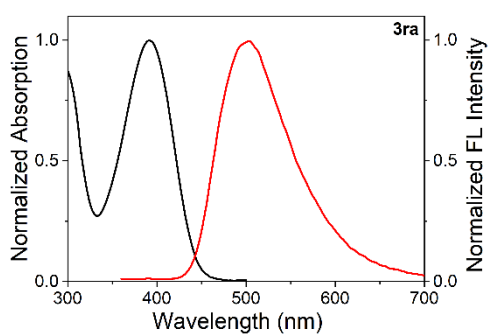

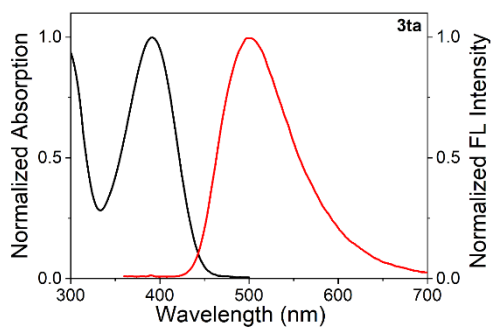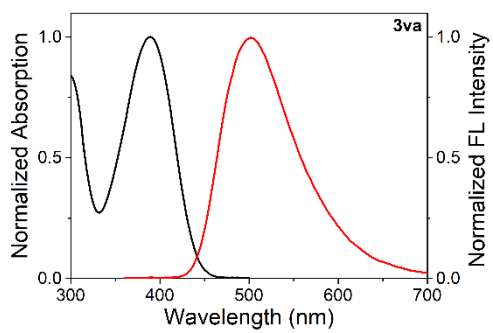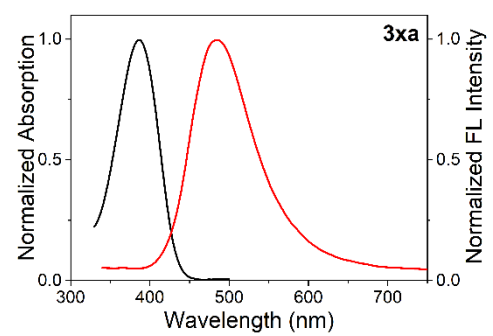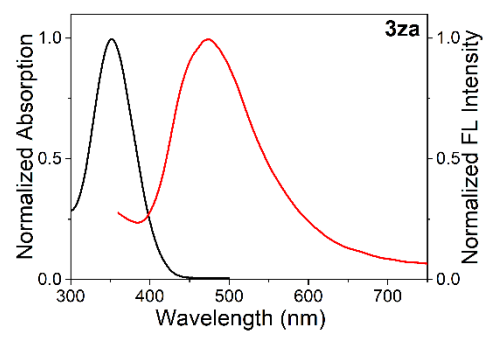

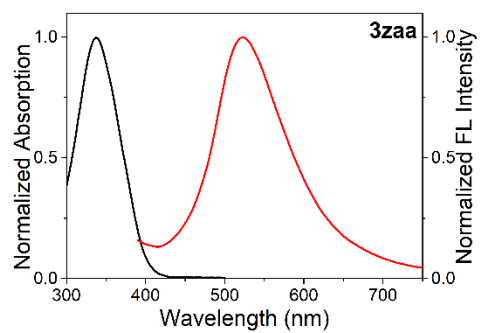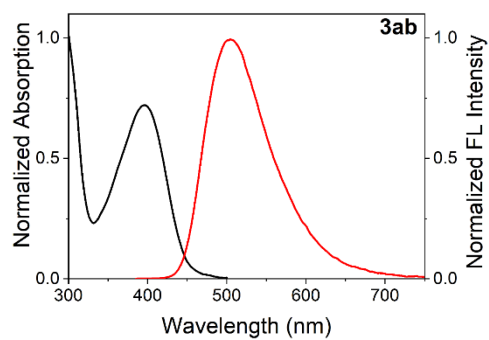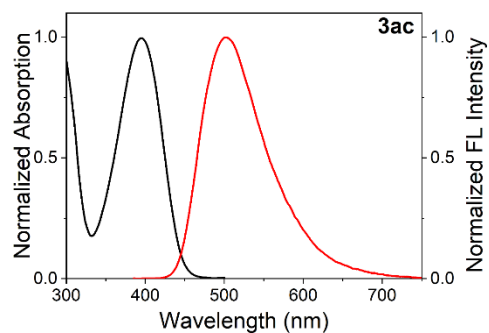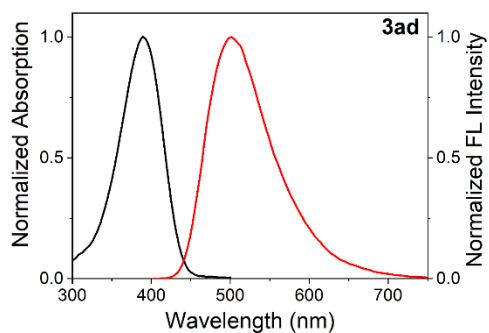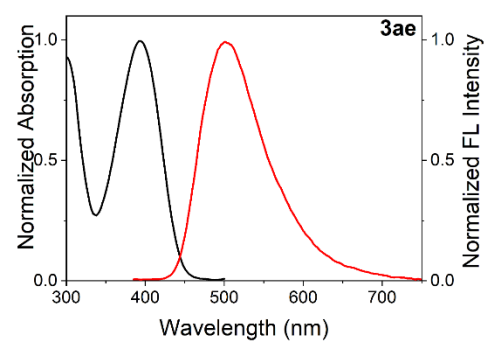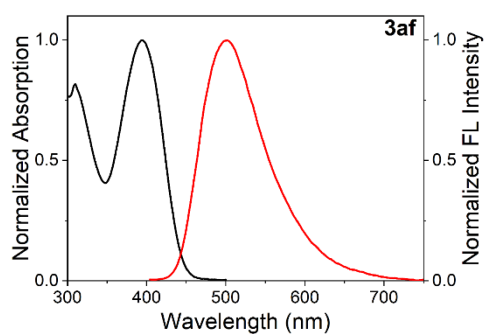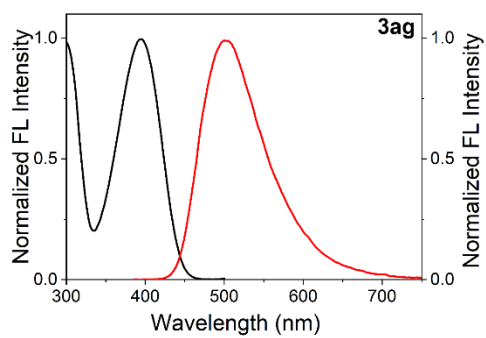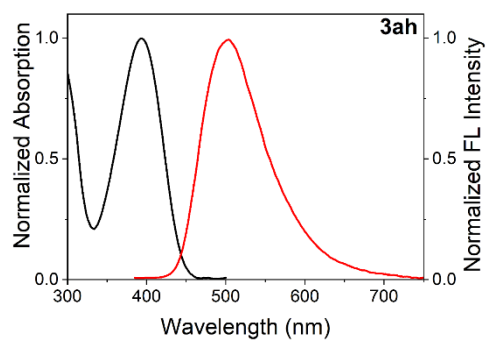

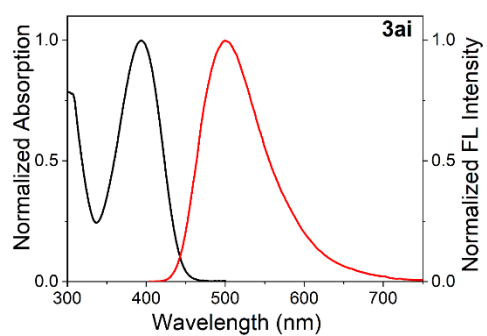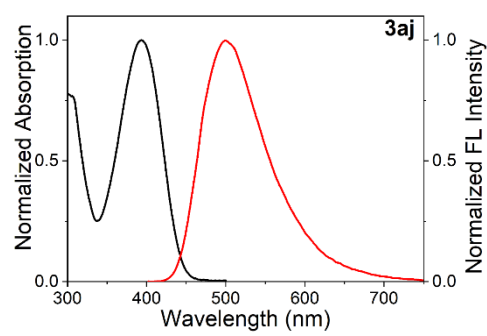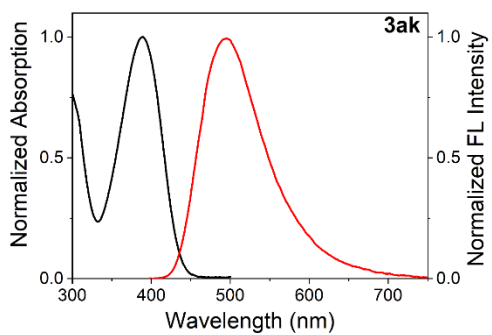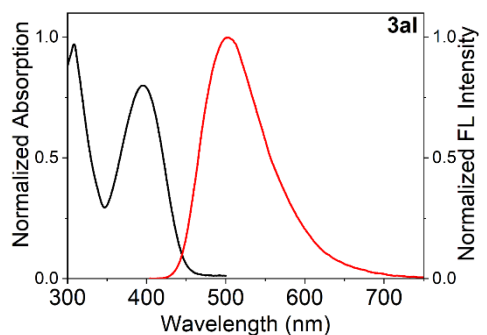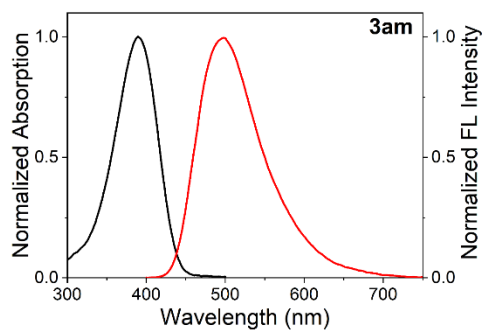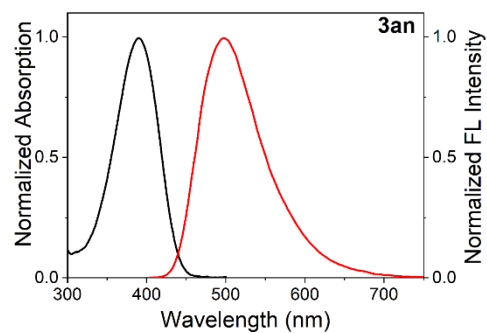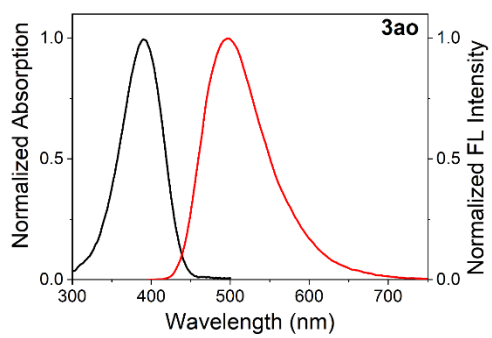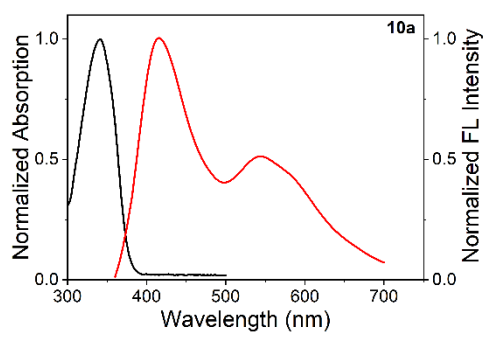

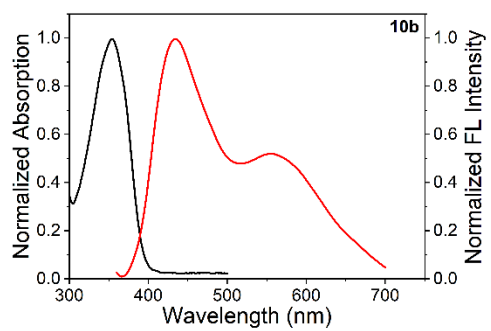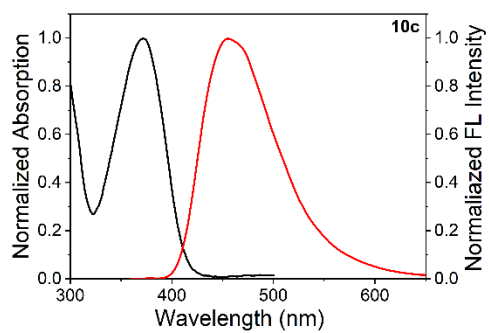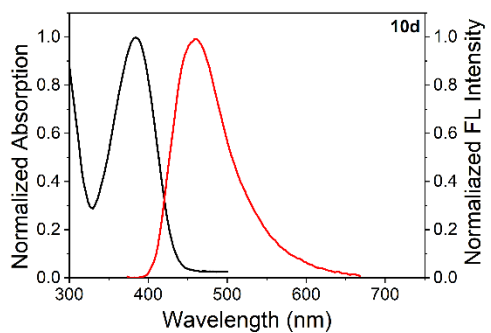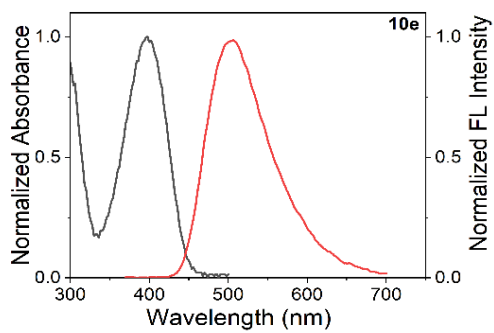

### 23. DFT Calculation of 10e.

The ground state geometry was optimized by using DFT method at B3LYP/6-31G(d,p) level. The same method was used for vibrational analysis to verify that the optimized structures correspond to local minima on the energy surface. TD-DFT computations were used the optimized ground state geometries under the B3LYP/6-31G(d,p) theoretical level. The calculated molecules in dichloromethane were done using the Self-Consistent Reaction Field (SCRF) method and Polarizable Continuum Model (PCM). The geometries of the lowest singlet (S1) excited states were also optimized at the TDB3LYP/6-31G(d,p) level of theory. All of the calculations were carried out by the methods implemented in Gaussian 09 package.<sup>4</sup>

**Table S2.** Main vertical singlet electronic energies,  $\Delta E$ , oscillator strengths,  $f$ , and main transitions for molecule **10e** calculated by B3LYP/6-31G(d,p) level in dichloromethane solvent.

| Dye                                                                                                                                                                                    | Electronic transition <sup>[a]</sup> | TD//B3LYP/6-31G(d, p) |                    |                            |                   |
|----------------------------------------------------------------------------------------------------------------------------------------------------------------------------------------|--------------------------------------|-----------------------|--------------------|----------------------------|-------------------|
|                                                                                                                                                                                        |                                      | $\Delta E$ (eV, nm)   | $f$ <sup>[b]</sup> | Composition <sup>[c]</sup> | CI <sup>[d]</sup> |
| <b>10e</b>                                                                                                                                                                             | S <sub>0</sub> →S <sub>1</sub>       | 3.0140 eV 411.37 nm   | 0.190<br>3         | HOMO → LUMO                | 0.701<br>3        |
|                                                                                                                                                                                        | S <sub>0</sub> →S <sub>2</sub>       | 3.7466 eV 330.93 nm   | 0.000<br>3         | HOMO -5 → LUMO             | 0.397<br>2        |
|                                                                                                                                                                                        |                                      |                       |                    | HOMO -3 → LUMO             | 0.412<br>8        |
|                                                                                                                                                                                        |                                      |                       |                    | HOMO -1 → LUMO             | 0.376<br>9        |
|                                                                                                                                                                                        | S <sub>0</sub> →S <sub>3</sub>       | 4.0118 eV 309.05 nm   | 0.216<br>0         | HOMO -4 → LUMO             | 0.114<br>5        |
|                                                                                                                                                                                        |                                      |                       |                    | HOMO → LUMO +1             | 0.693<br>4        |
|                                                                                                                                                                                        | S <sub>0</sub> →S <sub>7</sub>       | 4.7706 eV 259.89 nm   | 0.161<br>7         | HOMO -4 → LUMO             | 0.625<br>6        |
|                                                                                                                                                                                        |                                      |                       |                    | HOMO → LUMO +3             | 0.222<br>4        |
|                                                                                                                                                                                        | S <sub>0</sub> →S <sub>12</sub>      | 5.2698 eV 235.27 nm   | 0.333<br>7         | HOMO → LUMO +3             | 0.600<br>0        |
|                                                                                                                                                                                        |                                      |                       |                    | HOMO -4 → LUMO             | 0.236<br>0        |
|                                                                                                                                                                                        |                                      |                       |                    | HOMO -2 → LUMO +1          | 0.131<br>4        |
| [a] Only the selected low-lying excited states are presented. [b] Oscillator strength. [c] Only the main configurations are presented. [d] The CI coefficients are in absolute values. |                                      |                       |                    |                            |                   |

Optimized Geometries of the Compounds.

**10e**, optimized S<sub>0</sub> state Geometry.

|                         |             |               |             |
|-------------------------|-------------|---------------|-------------|
| O                       | -0.03982100 | 2.48212500    | 0.25719200  |
| O                       | -4.87468600 | -0.94321300   | -0.05231500 |
| N                       | 0.61728900  | -0.12454600   | 0.05328900  |
| H                       | 0.81563900  | 0.86746700    | 0.17755600  |
| O                       | 1.55797600  | -2.22257600   | -0.06503800 |
| C                       | -1.65645600 | 0.70766700    | 0.09397900  |
| C                       | -0.75417400 | -0.40354900   | 0.02877100  |
| C                       | -3.03808800 | 0.45319800    | 0.05353500  |
| C                       | -1.20958200 | 2.09562100    | 0.19806500  |
| H                       | -2.02077300 | 2.84450000    | 0.22507300  |
| C                       | 1.67744000  | -0.99663800   | -0.02249800 |
| C                       | -4.23627300 | 1.37486600    | 0.15352100  |
| H                       | -4.20535500 | 2.21924300    | -0.53999500 |
| C                       | -3.51283400 | -0.84937400   | -0.03931200 |
| C                       | 3.03404300  | -0.34979100   | -0.03911100 |
| C                       | -1.27019100 | -1.70748400   | -0.06228300 |
| H                       | -0.57835500 | -2.53487600   | -0.10644400 |
| C                       | -5.39637600 | 0.40913600    | -0.18791000 |
| H                       | -6.25399100 | 0.50205500    | 0.47987800  |
| H                       | -5.73225700 | 0.53648000    | -1.22251300 |
| C                       | -2.64601400 | -1.93697100   | -0.09808800 |
| H                       | -3.03291200 | -2.94781200   | -0.17016200 |
| C                       | 4.13042100  | -1.15515200   | 0.30274100  |
| H                       | 3.94863900  | -2.19042000   | 0.56926000  |
| C                       | 3.25517600  | 0.98719600    | -0.40537400 |
| H                       | 2.43200100  | 1.62634100    | -0.70869000 |
| C                       | 5.63317000  | 0.70262000    | -0.05730600 |
| H                       | 6.63905200  | 1.11157700    | -0.06333400 |
| C                       | 4.54934000  | 1.50758800    | -0.41372300 |
| H                       | 4.71029500  | 2.54079400    | -0.70548800 |
| C                       | 5.42080600  | -0.63155600   | 0.30025000  |
| H                       | 6.26064300  | -1.26228500   | 0.57543200  |
| H                       | -4.33384400 | 1.78379800    | 1.16614900  |
| SCF                     | done:       | -899.20368434 | Hartree     |
| No imaginary Frequency. |             |               |             |

**10e**, optimized S<sub>1</sub> state Geometry.

|   |             |             |             |
|---|-------------|-------------|-------------|
| O | -0.09752400 | 2.43377000  | -0.18170300 |
| O | 4.83271800  | -0.91191700 | 0.08515300  |
| N | -0.57185300 | -0.13930000 | -0.04606500 |
| H | -0.72851700 | 0.89052000  | -0.12879300 |
| O | -1.52602900 | -2.23668400 | -0.02472300 |
| C | 1.63988600  | 0.75279100  | -0.06059100 |
| C | 0.77725400  | -0.41353300 | -0.01747700 |

|     |             |               |             |
|-----|-------------|---------------|-------------|
| C   | 3.00514200  | 0.47804700    | -0.02131700 |
| C   | 1.14106000  | 2.11421600    | -0.13655800 |
| H   | 1.90083500  | 2.90664100    | -0.16169800 |
| C   | -1.65350600 | -1.00877500   | -0.01946500 |
| C   | 4.18466000  | 1.40640900    | -0.04114900 |
| H   | 4.17414900  | 2.09827000    | 0.81011300  |
| C   | 3.49660400  | -0.85470100   | 0.05646600  |
| C   | -2.99574300 | -0.35610700   | 0.00999200  |
| C   | 1.30304600  | -1.73407900   | 0.06106000  |
| H   | 0.59427000  | -2.54896700   | 0.08671400  |
| C   | 5.38466800  | 0.44199000    | 0.02150300  |
| H   | 6.02170700  | 0.47693700    | -0.86447500 |
| H   | 6.00365100  | 0.56777900    | 0.91184600  |
| C   | 2.67027200  | -1.98261700   | 0.09914100  |
| H   | 3.07655500  | -2.98385200   | 0.15749700  |
| C   | -4.11171400 | -1.18981900   | -0.18270400 |
| H   | -3.94210900 | -2.24745800   | -0.35022700 |
| C   | -3.20142100 | 1.01693700    | 0.24270300  |
| H   | -2.36875800 | 1.69007900    | 0.41839500  |
| C   | -5.59650300 | 0.69994200    | 0.06661300  |
| H   | -6.60165400 | 1.11025300    | 0.08619000  |
| C   | -4.49542100 | 1.53486800    | 0.27041800  |
| H   | -4.64297800 | 2.59445700    | 0.45528300  |
| C   | -5.40003000 | -0.66625600   | -0.15937900 |
| H   | -6.25225200 | -1.32053200   | -0.31626800 |
| H   | 4.20522900  | 2.02372800    | -0.94745500 |
| SCF | done:       | -897.89939488 | Hartree     |

No imaginary Frequency.

## 24. References

1. a) U. Kroesen, L. Knauer, C. Strohmman, *Angew. Chem. Int. Ed.* **2017**, *56*, 6232; b) M.-Y. Chang, M.-H. Wu, *Tetrahedron Lett.* **2012**, *53*, 3173; c) G. Li, Q. Liu, L. Vasamsetty, W. Guo, J. Wang, *Angew. Chem. Int. Ed.* **2020**, *59*, 3475.
2. W. Liu, W. Yang, J. Zhu, Y. Guo, N. Wang, J. Ke, P. Yu, C. He, *ACS Catal.* **2020**, *10*, 7207.
3. a) X. Wang, S. Song, N. Jiao, *Chin. J. Chem.* **2018**, *36*, 213. b) J. Ding, W. Jiang, H.-Y. Bai, T.-M. Ding, D. Gao, X. Bao, S.-Y. Zhang, *Chem. Commun.* **2018**, *54*, 8889.
4. Gaussian 09, Revision D.01, M. J. Frisch, G. W. Trucks, H. B. Schlegel, G. E. Scuseria, M. A. Robb, J. R. Cheeseman, G. Scalmani, V. Barone, B. Mennucci, G. A. Petersson, H. Nakatsuji, M. Caricato, X. Li, H. P. Hratchian, A. F. Izmaylov, J. Bloino, G. Zheng, J. L. Sonnenberg, M. Hada, M. Ehara, K. Toyota, R. Fukuda, J. Hasegawa, M. Ishida, T. Nakajima, Y. Honda, O. Kitao, H. Nakai, T. Vreven, J. A. Jr., Montgomery, J. E. Peralta, F. Ogliaro, M. Bearpark, J. J. Heyd, E. Brothers, K. N. Kudin, V. N. Staroverov, T. Keith, R. Kobayashi, J. Normand, K. Raghavachari, A. Rendell, J. C.

Burant, S. S. Iyengar, J. Tomasi, M. Cossi, N. Rega, J. M. Millam, M. Klene, J. E. Knox, J. B. Cross, V. Bakken, C. Adamo, J. Jaramillo, R. Gomperts, R. E. Stratmann, O. Yazyev, A. J. Austin, R. Cammi, C. Pomelli, J. W. Ochterski, R. L. Martin, K. Morokuma, V. G. Zakrzewski, G. A. Voth, P. Salvador, J. J. Dannenberg, S. Dapprich, A. D. Daniels, O. Farkas, J. B. Foresman, J. V. Ortiz, J. Cioslowski, D. J. Fox, Gaussian, Inc., Wallingford CT, 2013
